# Supplementary material
Source: publisher figshare collection journal article supplement (https://brill.figshare.com/ndownloader/files/34812739)
Supplement: Supplementary file 1 [file 34812739]

## Sheet: Sheet1
ID	A1	A2	A3	B1	B2	B3	C1	C2	C3	D1	D2	D3	E1	E2	E3	F1	F2	F3	NR_def	GO_ID	GO_term	KO_ID	KO_gene	Hyperlink	KEGG Pathway	Pathway ID	Kog_Annotation	Swiss-Prot_Id	Swiss-Prot_Annotation
LOC102462494	1.48657	1.45332	1.64316	1.71122	1.58354	1.63134	1.35392	1.38507	1.51904	1.39094	1.4239	1.31133	1.64493	1.59295	1.59106	1.58704	1.68476	1.65321	PREDICTED: tRNA dimethylallyltransferase, mitochondrial-like [Pelodiscus sinensis]	-	-	K00791	miaA,TRIT1	http://www.genome.jp/dbget-bin/www_bget?ko:K00791	Zeatin biosynthesis	ko00908	-	sp|Q80UN9|MOD5_MOUSE;gnl|BL_ORD_ID|93886	sp|Q80UN9|MOD5_MOUSE tRNA dimethylallyltransferase, mitochondrial OS=Mus musculus GN=Trit1 PE=2 SV=2;sp|Q80UN9|MOD5_MOUSE tRNA dimethylallyltransferase, mitochondrial OS=Mus musculus GN=Trit1 PE=2 SV=2
AQP3	1.78362	2.24927	1.70595	1.9525	1.99216	1.76035	2.27743	2.27068	2.2403	2.22024	1.99326	2.16259	2.49188	2.14283	2.48324	2.48952	2.41794	2.55682	PREDICTED: aquaporin-3 [Pelodiscus sinensis]	GO:0005737;GO:0005886;GO:0006810;GO:0032526;GO:0015250;GO:0005911;GO:0015793;GO:0005215;GO:0015254;GO:0016021;GO:0016020;GO:0042476;GO:0070295;GO:0016323;GO:0006833;GO:0015840;GO:0005634;GO:0002684	cytoplasm;plasma membrane;transport;response to retinoic acid;water channel activity;cell-cell junction;glycerol transport;transporter activity;glycerol channel activity;integral component of membrane;membrane;odontogenesis;renal water absorption;basolateral plasma membrane;water transport;urea transport;nucleus;positive regulation of immune system process	K09876	AQP3	http://www.genome.jp/dbget-bin/www_bget?ko:K09876	Vasopressin-regulated water reabsorption	ko04962	KOG0224(G)(Aquaporin (major intrinsic protein family))	sp|Q08DE6|AQP3_BOVIN;gnl|BL_ORD_ID|283377	sp|Q08DE6|AQP3_BOVIN Aquaporin-3 OS=Bos taurus GN=AQP3 PE=2 SV=1;sp|Q08DE6|AQP3_BOVIN Aquaporin-3 OS=Bos taurus GN=AQP3 PE=2 SV=1
LOC102463738	2.07192	2.46526	2.16367	2.67668	2.84354	2.30718	2.91863	2.98159	2.92413	2.97043	2.72151	2.67147	3.31714	2.82475	3.29175	3.53881	3.07199	3.40783	PREDICTED: aquaporin-2 isoform X3 [Callithrix jacchus];PREDICTED: aquaporin-2 [Pelodiscus sinensis]	GO:0006810;GO:0005215;GO:0016021;GO:0016020	transport;transporter activity;integral component of membrane;membrane	K09865	AQP2	http://www.genome.jp/dbget-bin/www_bget?ko:K09865	Vasopressin-regulated water reabsorption	ko04962	KOG0223(G)(Aquaporin (major intrinsic protein family))	sp|O62735|AQP2_SHEEP;sp|P79099|AQP2_BOVIN;gnl|BL_ORD_ID|276866	sp|O62735|AQP2_SHEEP Aquaporin-2 OS=Ovis aries GN=AQP2 PE=2 SV=1;sp|P79099|AQP2_BOVIN Aquaporin-2 OS=Bos taurus GN=AQP2 PE=2 SV=2;sp|O62735|AQP2_SHEEP Aquaporin-2 OS=Ovis aries GN=AQP2 PE=2 SV=1
ACADM	2.08282	2.08045	2.03914	1.68735	1.94601	1.6465	2.37771	2.31639	2.18441	2.25993	2.25597	2.12123	1.97067	2.32255	2.3373	2.00715	2.06262	2.12979	PREDICTED: medium-chain specific acyl-CoA dehydrogenase, mitochondrial [Chelonia mydas];PREDICTED: medium-chain specific acyl-CoA dehydrogenase, mitochondrial isoform X2 [Chrysemys picta bellii]	-	-	K00249	ACADM,acd	http://www.genome.jp/dbget-bin/www_bget?ko:K00249	Valine, leucine and isoleucine degradation;Propanoate metabolism;Fatty acid degradation;beta-Alanine metabolism;Carbon metabolism;Fatty acid metabolism;PPAR signaling pathway	ko00280,ko00640,ko00071,ko00410,ko01200,ko01212,ko03320	KOG0137(I)(Very-long-chain acyl-CoA dehydrogenase)	gnl|BL_ORD_ID|268647;sp|Q3SZB4|ACADM_BOVIN	sp|Q3SZB4|ACADM_BOVIN Medium-chain specific acyl-CoA dehydrogenase, mitochondrial OS=Bos taurus GN=ACADM PE=2 SV=1;sp|Q3SZB4|ACADM_BOVIN Medium-chain specific acyl-CoA dehydrogenase, mitochondrial OS=Bos taurus GN=ACADM PE=2 SV=1
BCKDHA	1.67089	1.59028	1.80767	2.1014	2.14897	2.32862	1.60163	1.61773	1.70114	1.54937	1.59073	1.60021	1.78017	1.8053	1.93877	1.95236	1.84671	1.90069	PREDICTED: 2-oxoisovalerate dehydrogenase subunit alpha, mitochondrial [Pelodiscus sinensis]	-	-	K00166	BCKDHA,bkdA1	http://www.genome.jp/dbget-bin/www_bget?ko:K00166	Valine, leucine and isoleucine degradation;Propanoate metabolism	ko00280,ko00640	KOG1182(C)(Branched chain alpha-keto acid dehydrogenase complex, alpha subunit)	sp|P11178|ODBA_BOVIN;gnl|BL_ORD_ID|423446	sp|P11178|ODBA_BOVIN 2-oxoisovalerate dehydrogenase subunit alpha, mitochondrial OS=Bos taurus GN=BCKDHA PE=1 SV=1;sp|P11178|ODBA_BOVIN 2-oxoisovalerate dehydrogenase subunit alpha, mitochondrial OS=Bos taurus GN=BCKDHA PE=1 SV=1
ALDH6A1	2.10646	1.96965	2.06956	1.89014	2.06435	1.93008	2.31716	2.28058	2.22201	2.25455	2.28196	2.10212	2.03451	2.38839	2.39534	2.07405	2.17208	2.17522	PREDICTED: methylmalonate-semialdehyde dehydrogenase [acylating], mitochondrial [Pelodiscus sinensis]	-	-	K00140	mmsA,iolA,ALDH6A1	http://www.genome.jp/dbget-bin/www_bget?ko:K00140	Valine, leucine and isoleucine degradation;Inositol phosphate metabolism;Propanoate metabolism;beta-Alanine metabolism;Carbon metabolism	ko00280,ko00562,ko00640,ko00410,ko01200	KOG2450(C)(Aldehyde dehydrogenase);KOG2451(C)(Aldehyde dehydrogenase)	gnl|BL_ORD_ID|95068;sp|Q07536|MMSA_BOVIN;sp|Q02252|MMSA_HUMAN	sp|Q02252|MMSA_HUMAN Methylmalonate-semialdehyde dehydrogenase [acylating], mitochondrial OS=Homo sapiens GN=ALDH6A1 PE=1 SV=2;sp|Q07536|MMSA_BOVIN Methylmalonate-semialdehyde dehydrogenase [acylating], mitochondrial OS=Bos taurus GN=ALDH6A1 PE=1 SV=1;sp|Q02252|MMSA_HUMAN Methylmalonate-semialdehyde dehydrogenase [acylating], mitochondrial OS=Homo sapiens GN=ALDH6A1 PE=1 SV=2
ACAA2	2.25339	2.34953	2.23623	2.18687	2.13402	2.2259	2.43675	2.37927	2.29429	2.33887	2.40897	2.38485	2.29327	2.43122	2.4135	2.11995	2.22464	2.32465	PREDICTED: 3-ketoacyl-CoA thiolase, mitochondrial [Pelodiscus sinensis]	GO:0070062;GO:0008152;GO:0003824;GO:0005743;GO:0005739;GO:0016747;GO:0044822;GO:1901029;GO:0016740;GO:0071456;GO:0016746;GO:1902109	extracellular exosome;metabolic process;catalytic activity;mitochondrial inner membrane;mitochondrion;transferase activity, transferring acyl groups other than amino-acyl groups;RNA binding;negative regulation of mitochondrial outer membrane permeabilization involved in apoptotic signaling pathway;transferase activity;cellular response to hypoxia;transferase activity, transferring acyl groups;neg…	K07508	ACAA2	http://www.genome.jp/dbget-bin/www_bget?ko:K07508	Valine, leucine and isoleucine degradation;Fatty acid degradation;Fatty acid elongation;Fatty acid metabolism	ko00280,ko00071,ko00062,ko01212	KOG1390(I)(Acetyl-CoA acetyltransferase)	sp|Q3T0R7|THIM_BOVIN;sp|Q8BWT1|THIM_MOUSE;gnl|BL_ORD_ID|513852	sp|Q3T0R7|THIM_BOVIN 3-ketoacyl-CoA thiolase, mitochondrial OS=Bos taurus GN=ACAA2 PE=2 SV=1;sp|Q8BWT1|THIM_MOUSE 3-ketoacyl-CoA thiolase, mitochondrial OS=Mus musculus GN=Acaa2 PE=1 SV=3;sp|Q3T0R7|THIM_BOVIN 3-ketoacyl-CoA thiolase, mitochondrial OS=Bos taurus GN=ACAA2 PE=2 SV=1
ACADS	2.19457	2.21423	1.99423	1.74225	1.56949	1.88553	2.17114	2.20028	2.03427	1.87818	1.87892	1.8697	2.11093	2.35307	2.318	1.8512	1.84535	1.93425	PREDICTED: short-chain specific acyl-CoA dehydrogenase, mitochondrial isoform X1 [Pelodiscus sinensis];PREDICTED: short-chain specific acyl-CoA dehydrogenase, mitochondrial isoform X2 [Pelodiscus sinensis]	-	-	K00248	ACADS,bcd	http://www.genome.jp/dbget-bin/www_bget?ko:K00248	Valine, leucine and isoleucine degradation;Butanoate metabolism;Fatty acid degradation;Carbon metabolism;Fatty acid metabolism	ko00280,ko00650,ko00071,ko01200,ko01212	KOG0137(I)(Very-long-chain acyl-CoA dehydrogenase)	sp|P15651|ACADS_RAT;gnl|BL_ORD_ID|261344	sp|P15651|ACADS_RAT Short-chain specific acyl-CoA dehydrogenase, mitochondrial OS=Rattus norvegicus GN=Acads PE=1 SV=2;sp|P15651|ACADS_RAT Short-chain specific acyl-CoA dehydrogenase, mitochondrial OS=Rattus norvegicus GN=Acads PE=1 SV=2
HERC2	1.70808	1.75641	1.64797	1.74453	1.62055	1.70749	1.51028	1.52892	1.62818	1.55799	1.55157	1.4853	1.6852	1.67779	1.70629	1.78576	1.72049	1.6981	PREDICTED: E3 ubiquitin-protein ligase HERC2 [Pelodiscus sinensis]	-	-	K10595	HERC2	http://www.genome.jp/dbget-bin/www_bget?ko:K10595	Ubiquitin mediated proteolysis	ko04120	KOG0940(O)(Ubiquitin protein ligase RSP5/NEDD4);KOG1426(S)(FOG: RCC1 domain);KOG0941(O)(E3 ubiquitin protein ligase)	sp|Q4U2R1|HERC2_MOUSE;gnl|BL_ORD_ID|27417;sp|O95714|HERC2_HUMAN	sp|Q4U2R1|HERC2_MOUSE E3 ubiquitin-protein ligase HERC2 OS=Mus musculus GN=Herc2 PE=1 SV=3;sp|O95714|HERC2_HUMAN E3 ubiquitin-protein ligase HERC2 OS=Homo sapiens GN=HERC2 PE=1 SV=2;sp|O95714|HERC2_HUMAN E3 ubiquitin-protein ligase HERC2 OS=Homo sapiens GN=HERC2 PE=1 SV=2
LOC102453533	1.60638	1.58478	1.50732	1.96567	2.12966	2.23099	1.89459	1.51508	1.7417	1.75128	1.81974	1.74827	1.67477	1.67422	1.79906	1.79546	1.54765	1.84267	PREDICTED: cullin-9-like [Pelodiscus sinensis];Cullin-7 [Chelonia mydas];PREDICTED: cullin-7 [Chelonia mydas]	-	-	K10613;K11970	CUL7;CUL9,PARC	http://www.genome.jp/dbget-bin/www_bget?ko:K10613;http://www.genome.jp/dbget-bin/www_bget?ko:K11970	Ubiquitin mediated proteolysis	ko04120	-	gnl|BL_ORD_ID|348039;sp|Q8IWT3|CUL9_HUMAN	sp|Q8IWT3|CUL9_HUMAN Cullin-9 OS=Homo sapiens GN=CUL9 PE=1 SV=2;sp|Q8IWT3|CUL9_HUMAN Cullin-9 OS=Homo sapiens GN=CUL9 PE=1 SV=2
LOC102462252	2.38546	2.25239	2.48153	2.60066	2.30367	2.49643	2.02938	2.07306	2.22456	2.06378	2.02898	2.16864	1.8341	1.65147	1.72419	1.70817	2.0959	1.88343	PREDICTED: ubiquitin-conjugating enzyme E2 C isoform X2 [Chrysemys picta bellii];PREDICTED: ubiquitin-conjugating enzyme E2 C-like [Pelodiscus sinensis]	GO:0005524;GO:0000166	ATP binding;nucleotide binding	K06688	UBE2C,UBC11	http://www.genome.jp/dbget-bin/www_bget?ko:K06688	Ubiquitin mediated proteolysis	ko04120	KOG0417(O)(Ubiquitin-protein ligase);KOG0421(O)(Ubiquitin-protein ligase);KOG0419(O)(Ubiquitin-protein ligase)	sp|Q4R9D1|UBE2C_MACFA;sp|O00762|UBE2C_HUMAN;gnl|BL_ORD_ID|239489	sp|Q4R9D1|UBE2C_MACFA Ubiquitin-conjugating enzyme E2 C OS=Macaca fascicularis GN=UBE2C PE=2 SV=1;sp|O00762|UBE2C_HUMAN Ubiquitin-conjugating enzyme E2 C OS=Homo sapiens GN=UBE2C PE=1 SV=1;sp|Q4R9D1|UBE2C_MACFA Ubiquitin-conjugating enzyme E2 C OS=Macaca fascicularis GN=UBE2C PE=2 SV=1
LOC106732298	1.35411	1.23019	1.41963	1.88321	1.91693	1.84167	1.53857	1.56217	1.57496	1.54937	1.60756	1.53339	1.4553	1.47465	1.55108	1.37273	1.38346	1.47914	PREDICTED: rho-related BTB domain-containing protein 2-like [Chrysemys picta bellii]	-	-	K07868	RHOBTB1_2	http://www.genome.jp/dbget-bin/www_bget?ko:K07868	Ubiquitin mediated proteolysis	ko04120	-	gnl|BL_ORD_ID|163651	sp|Q9BYZ6|RHBT2_HUMAN Rho-related BTB domain-containing protein 2 OS=Homo sapiens GN=RHOBTB2 PE=1 SV=2
RRP8	1.6067	1.50569	1.50529	1.7956	1.82458	1.85345	1.4128	1.59605	1.67173	1.62521	1.68079	1.53845	1.51733	1.447	1.48116	1.60021	1.463	1.54986	F-box/WD repeat-containing protein 7 [Chelonia mydas];PREDICTED: ribosomal RNA-processing protein 8, partial [Pelodiscus sinensis]	-	-	K14850;K10260	RRP8;FBXW7,SEL10	http://www.genome.jp/dbget-bin/www_bget?ko:K14850;http://www.genome.jp/dbget-bin/www_bget?ko:K10260	Ubiquitin mediated proteolysis	ko04120	KOG3045(A)(Predicted RNA methylase involved in rRNA processing)	gnl|BL_ORD_ID|187858;sp|Q5U4F0|RRP8_RAT	sp|O43159|RRP8_HUMAN Ribosomal RNA-processing protein 8 OS=Homo sapiens GN=RRP8 PE=1 SV=2;sp|Q5U4F0|RRP8_RAT Ribosomal RNA-processing protein 8 OS=Rattus norvegicus GN=Rrp8 PE=1 SV=1
SAE1	1.64078	1.455	1.50961	1.92552	1.82872	1.96109	1.45362	1.60423	1.70544	1.65312	1.65244	1.67587	1.37088	1.48601	1.5392	1.3587	1.46938	1.33566	PREDICTED: SUMO-activating enzyme subunit 1 [Pelodiscus sinensis]	-	-	K10684	UBLE1A,SAE1	http://www.genome.jp/dbget-bin/www_bget?ko:K10684	Ubiquitin mediated proteolysis	ko04120	KOG2016(O)(NEDD8-activating complex, APP-BP1/UBA5 component);KOG2014(O)(SMT3/SUMO-activating complex, AOS1/RAD31 component)	gnl|BL_ORD_ID|487302;sp|A2VE14|SAE1_BOVIN	sp|A2VE14|SAE1_BOVIN SUMO-activating enzyme subunit 1 OS=Bos taurus GN=SAE1 PE=2 SV=1;sp|A2VE14|SAE1_BOVIN SUMO-activating enzyme subunit 1 OS=Bos taurus GN=SAE1 PE=2 SV=1
NQO1	1.794	1.5293	1.83872	1.92516	2.09992	1.65447	2.02682	1.81928	1.97868	2.13586	2.00268	1.93566	2.20575	2.22755	2.48504	2.34661	2.28614	2.37504	PREDICTED: NAD(P)H dehydrogenase [quinone] 1 [Pelodiscus sinensis]	GO:0005737;GO:0003955;GO:0070062;GO:0042802;GO:0043086;GO:0044822;GO:0006979	cytoplasm;NAD(P)H dehydrogenase (quinone) activity;extracellular exosome;identical protein binding;negative regulation of catalytic activity;RNA binding;response to oxidative stress	K00355	NQO1	http://www.genome.jp/dbget-bin/www_bget?ko:K00355	Ubiquinone and other terpenoid-quinone biosynthesis	ko00130	-	gnl|BL_ORD_ID|421839;sp|P05982|NQO1_RAT	sp|P05982|NQO1_RAT NAD(P)H dehydrogenase [quinone] 1 OS=Rattus norvegicus GN=Nqo1 PE=1 SV=4;sp|P05982|NQO1_RAT NAD(P)H dehydrogenase [quinone] 1 OS=Rattus norvegicus GN=Nqo1 PE=1 SV=4
GSTZ1	1.56514	1.35984	1.44091	1.46538	1.57357	1.36154	1.60981	1.71181	1.50215	1.73239	1.71908	1.64454	1.69644	2.19637	2.10514	1.6505	2.00022	1.94846	PREDICTED: maleylacetoacetate isomerase isoform X1 [Pelodiscus sinensis];PREDICTED: maleylacetoacetate isomerase isoform X2 [Pelodiscus sinensis]	GO:0005737;GO:0003824;GO:0009072;GO:0005739	cytoplasm;catalytic activity;aromatic amino acid family metabolic process;mitochondrion	K01800	maiA,GSTZ1	http://www.genome.jp/dbget-bin/www_bget?ko:K01800	Tyrosine metabolism;Styrene degradation	ko00350,ko00643	KOG0868(O)(Glutathione S-transferase)	gnl|BL_ORD_ID|82021;sp|O43708|MAAI_HUMAN;gnl|BL_ORD_ID|404114;sp|P57113|MAAI_RAT	sp|O43708|MAAI_HUMAN Maleylacetoacetate isomerase OS=Homo sapiens GN=GSTZ1 PE=1 SV=3;sp|O43708|MAAI_HUMAN Maleylacetoacetate isomerase OS=Homo sapiens GN=GSTZ1 PE=1 SV=3;sp|P57113|MAAI_RAT Maleylacetoacetate isomerase OS=Rattus norvegicus GN=Gstz1 PE=1 SV=2;sp|P57113|MAAI_RAT Maleylacetoacetate isomerase OS=Rattus norvegicus GN=Gstz1 PE=1 SV=2
LOC102463576	2.51363	2.51045	2.48468	2.4391	2.55511	2.50142	2.51772	2.67049	2.64846	2.51508	2.49189	2.45685	2.62087	2.74345	2.86311	2.63511	2.7468	2.58288	alcohol dehydrogenase class III [Pelodiscus sinensis];PREDICTED: alcohol dehydrogenase class-3 [Pelodiscus sinensis]	GO:0051903;GO:0055114;GO:0016491;GO:0006069;GO:0008270;GO:0046872	S-(hydroxymethyl)glutathione dehydrogenase activity;oxidation-reduction process;oxidoreductase activity;ethanol oxidation;zinc ion binding;metal ion binding	K00121	frmA,ADH5,adhC	http://www.genome.jp/dbget-bin/www_bget?ko:K00121	Tyrosine metabolism;Glycolysis / Gluconeogenesis;Methane metabolism;Fatty acid degradation;Retinol metabolism;Carbon metabolism;Degradation of aromatic compounds;Chloroalkane and chloroalkene degradation;Drug metabolism - cytochrome P450;Metabolism of xenobiotics by cytochrome P450;Naphthalene degradation	ko00350,ko00010,ko00680,ko00071,ko00830,ko01200,ko01220,ko00625,ko00982,ko00980,ko00626	KOG0022(Q)(Alcohol dehydrogenase, class III)	gnl|BL_ORD_ID|270418;sp|P80467|ADHX_SAAHA	sp|P80467|ADHX_SAAHA Alcohol dehydrogenase class-3 OS=Saara hardwickii PE=1 SV=1;sp|P80467|ADHX_SAAHA Alcohol dehydrogenase class-3 OS=Saara hardwickii PE=1 SV=1
LOC102451983	1.96628	2.0436	1.8861	1.7542	1.80161	1.89675	2.05115	1.95918	1.95075	2.00225	2.03234	2.02522	2.11093	2.08508	2.21005	2.02596	2.11143	2.19137	PREDICTED: alcohol dehydrogenase 1 [Pelodiscus sinensis]<>CCQ25770.1 alcohol dehydrogenase class VII [Pelodiscus sinensis]	GO:0055114;GO:0016491;GO:0008270;GO:0046872	oxidation-reduction process;oxidoreductase activity;zinc ion binding;metal ion binding	K13951	ADH1_7	http://www.genome.jp/dbget-bin/www_bget?ko:K13951	Tyrosine metabolism;Glycolysis / Gluconeogenesis;Fatty acid degradation;Retinol metabolism;Drug metabolism - cytochrome P450;Metabolism of xenobiotics by cytochrome P450	ko00350,ko00010,ko00071,ko00830,ko00982,ko00980	KOG0022(Q)(Alcohol dehydrogenase, class III)	gnl|BL_ORD_ID|272791;sp|P86883|ADH1_COLLI	sp|P86883|ADH1_COLLI Alcohol dehydrogenase 1 OS=Columba livia GN=ADH1 PE=1 SV=1;sp|P86883|ADH1_COLLI Alcohol dehydrogenase 1 OS=Columba livia GN=ADH1 PE=1 SV=1
LOC102452388	2.18517	1.78462	1.98444	1.96769	2.1873	1.84862	2.39324	2.24998	2.50028	2.4383	2.41164	2.27852	2.7021	2.85673	2.96558	2.75192	2.64001	2.80074	PREDICTED: alcohol dehydrogenase 1 [Pelodiscus sinensis]<>CCQ25767.1 alcohol dehydrogenase class I [Pelodiscus sinensis]	GO:0055114;GO:0016491;GO:0008270;GO:0046872	oxidation-reduction process;oxidoreductase activity;zinc ion binding;metal ion binding	K13951	ADH1_7	http://www.genome.jp/dbget-bin/www_bget?ko:K13951	Tyrosine metabolism;Glycolysis / Gluconeogenesis;Fatty acid degradation;Retinol metabolism;Drug metabolism - cytochrome P450;Metabolism of xenobiotics by cytochrome P450	ko00350,ko00010,ko00071,ko00830,ko00982,ko00980	KOG0022(Q)(Alcohol dehydrogenase, class III)	gnl|BL_ORD_ID|273696	sp|P80338|ADH1_STRCA Alcohol dehydrogenase 1 OS=Struthio camelus GN=ADH1 PE=1 SV=1
FAHD1	1.58206	1.6026	1.56301	1.50229	1.61204	1.64098	1.69574	1.61458	1.74445	1.63033	1.4615	1.49624	1.68142	1.79511	1.98941	1.6668	1.72041	1.72835	PREDICTED: acylpyruvase FAHD1, mitochondrial [Pelodiscus sinensis]	GO:0005737;GO:0005654;GO:0008152;GO:0003824;GO:0005743;GO:0005739;GO:0018773;GO:0034545;GO:0005829;GO:0008948;GO:0016787	cytoplasm;nucleoplasm;metabolic process;catalytic activity;mitochondrial inner membrane;mitochondrion;acetylpyruvate hydrolase activity;fumarylpyruvate hydrolase activity;cytosol;oxaloacetate decarboxylase activity;hydrolase activity	K01557	FAHD1	http://www.genome.jp/dbget-bin/www_bget?ko:K01557	Tyrosine metabolism	ko00350	KOG1535(R)(Predicted fumarylacetoacetate hydralase)	gnl|BL_ORD_ID|390541	sp|Q6AYQ8|FAHD1_RAT Acylpyruvase FAHD1, mitochondrial OS=Rattus norvegicus GN=Fahd1 PE=1 SV=1
LOC102457585	1.57415	1.43759	1.35641	1.45818	1.74687	1.58309	1.90784	1.85594	1.76065	1.94438	1.85431	1.95342	1.7605	1.98195	1.88542	1.88007	1.8374	1.93982	PREDICTED: LOW QUALITY PROTEIN: alkaline phosphatase, tissue-nonspecific isozyme-like [Pelodiscus sinensis]	GO:0016020;GO:0001649;GO:0016791;GO:0070062;GO:0008152;GO:0003824;GO:0003006;GO:0005886;GO:0001958;GO:0046677;GO:0016787;GO:0016462;GO:0033280;GO:0004035;GO:0065010;GO:0071407;GO:0005578	membrane;osteoblast differentiation;phosphatase activity;extracellular exosome;metabolic process;catalytic activity;developmental process involved in reproduction;plasma membrane;endochondral ossification;response to antibiotic;hydrolase activity;pyrophosphatase activity;response to vitamin D;alkaline phosphatase activity;extracellular membrane-bounded organelle;cellular response to organic cycli…	K01077	E3.1.3.1,phoA,phoB	http://www.genome.jp/dbget-bin/www_bget?ko:K01077	Two-component system;Folate biosynthesis;Thiamine metabolism;Aminobenzoate degradation	ko02020,ko00790,ko00730,ko00627	KOG4126(P)(Alkaline phosphatase)	gnl|BL_ORD_ID|136116;sp|Q92058|PPBT_CHICK;sp|Q29486|PPBT_FELCA	sp|P09487|PPBT_BOVIN Alkaline phosphatase, tissue-nonspecific isozyme OS=Bos taurus GN=ALPL PE=1 SV=2;sp|Q92058|PPBT_CHICK Alkaline phosphatase, tissue-nonspecific isozyme OS=Gallus gallus GN=ALPL PE=2 SV=1;sp|Q29486|PPBT_FELCA Alkaline phosphatase, tissue-nonspecific isozyme OS=Felis catus GN=ALPL PE=1 SV=1
CCBL1	1.98682	1.82556	1.82924	1.60119	1.63458	1.44592	2.19081	2.10707	1.95899	1.93531	1.9489	1.89092	1.84677	2.35009	2.37227	1.88264	1.89966	2.25445	PREDICTED: kynurenine--oxoglutarate transaminase 1 isoform X3 [Pelodiscus sinensis];PREDICTED: kynurenine--oxoglutarate transaminase 1 isoform X4 [Pelodiscus sinensis];PREDICTED: kynurenine--oxoglutarate transaminase 1 isoform X2 [Pelodiscus sinensis];PREDICTED: kynurenine--oxoglutarate transaminase 1 isoform X1 [Pelodiscus sinensis]	GO:0005737;GO:0005654;GO:0003824;GO:0030170;GO:0009058	cytoplasm;nucleoplasm;catalytic activity;pyridoxal phosphate binding;biosynthetic process	K00816	CCBL	http://www.genome.jp/dbget-bin/www_bget?ko:K00816	Tryptophan metabolism;Selenocompound metabolism	ko00380,ko00450	KOG0257(E)(Kynurenine aminotransferase, glutamine transaminase K)	gnl|BL_ORD_ID|71225;sp|Q16773|KAT1_HUMAN;gnl|BL_ORD_ID|66119	sp|Q08415|KAT1_RAT Kynurenine--oxoglutarate transaminase 1, mitochondrial OS=Rattus norvegicus GN=Kyat1 PE=1 SV=1;sp|Q16773|KAT1_HUMAN Kynurenine--oxoglutarate transaminase 1 OS=Homo sapiens GN=KYAT1 PE=1 SV=1;sp|Q16773|KAT1_HUMAN Kynurenine--oxoglutarate transaminase 1 OS=Homo sapiens GN=KYAT1 PE=1 SV=1
CLDN10	1.55133	1.42423	1.33143	1.29929	1.48869	1.60119	1.75511	1.70766	1.6653	1.771	1.65543	1.48799	1.63548	2.15761	1.98009	1.65196	1.73743	1.73791	PREDICTED: claudin-10 isoform X1 [Pelodiscus sinensis];PREDICTED: claudin-10 isoform X2 [Pelodiscus sinensis]	GO:0005737;GO:0005886;GO:0030054;GO:0016021;GO:0016020;GO:0005198;GO:0005923	cytoplasm;plasma membrane;cell junction;integral component of membrane;membrane;structural molecule activity;bicellular tight junction	K06087	CLDN	http://www.genome.jp/dbget-bin/www_bget?ko:K06087	Tight junction;Cell adhesion molecules (CAMs);Leukocyte transendothelial migration	ko04530,ko04514,ko04670	-	sp|Q5E9L0|CLD10_BOVIN;gnl|BL_ORD_ID|330127	sp|Q5E9L0|CLD10_BOVIN Claudin-10 OS=Bos taurus GN=CLDN10 PE=2 SV=1;sp|Q5E9L0|CLD10_BOVIN Claudin-10 OS=Bos taurus GN=CLDN10 PE=2 SV=1
CLDN7	1.83404	1.9914	1.99625	1.77408	1.81525	1.97626	1.97676	1.97424	1.98843	2.06524	1.94571	1.92179	2.09985	2.26364	2.04485	2.10044	2.0553	2.06092	PREDICTED: claudin-7 [Pelodiscus sinensis]	GO:0016020;GO:0016328;GO:0005886;GO:0005198;GO:0016323;GO:0030054;GO:0016327;GO:0098792;GO:0016021;GO:0005923;GO:0002230	membrane;lateral plasma membrane;plasma membrane;structural molecule activity;basolateral plasma membrane;cell junction;apicolateral plasma membrane;xenophagy;integral component of membrane;bicellular tight junction;positive regulation of defense response to virus by host	K06087	CLDN	http://www.genome.jp/dbget-bin/www_bget?ko:K06087	Tight junction;Cell adhesion molecules (CAMs);Leukocyte transendothelial migration	ko04530,ko04514,ko04670	-	gnl|BL_ORD_ID|332750	sp|Q9YH92|CLD7B_DANRE Claudin-7-B OS=Danio rerio GN=cldn7b PE=2 SV=1
F11R	1.63639	1.51162	1.65734	1.70995	1.79358	1.77895	1.81451	1.70663	1.78254	1.80665	1.8238	1.75427	1.90075	1.93217	1.83136	1.91259	1.85661	1.87927	PREDICTED: junctional adhesion molecule A [Pelodiscus sinensis]	-	-	K06089	F11R,JAM1	http://www.genome.jp/dbget-bin/www_bget?ko:K06089	Tight junction;Cell adhesion molecules (CAMs);Leukocyte transendothelial migration	ko04530,ko04514,ko04670	-	sp|O88792|JAM1_MOUSE;sp|Q9JHY1|JAM1_RAT;gnl|BL_ORD_ID|60901	sp|O88792|JAM1_MOUSE Junctional adhesion molecule A OS=Mus musculus GN=F11r PE=1 SV=2;sp|Q9JHY1|JAM1_RAT Junctional adhesion molecule A OS=Rattus norvegicus GN=F11r PE=1 SV=1;sp|Q9JHY1|JAM1_RAT Junctional adhesion molecule A OS=Rattus norvegicus GN=F11r PE=1 SV=1
LOC102454797	0.964731	1.14675	1.29535	1.42374	1.53605	1.76701	1.67742	1.7007	1.70578	1.82334	1.74036	1.436	2.08375	2.02678	1.75458	2.22881	1.92752	2.09635	PREDICTED: claudin-3 [Pelodiscus sinensis]	GO:0070062;GO:0042802;GO:0005886;GO:0051291;GO:0030054;GO:0051260;GO:0016021;GO:0003382;GO:0016020;GO:0016328;GO:0005198;GO:0016327;GO:0001666;GO:0070830;GO:0016338;GO:0005923	extracellular exosome;identical protein binding;plasma membrane;protein heterooligomerization;cell junction;protein homooligomerization;integral component of membrane;epithelial cell morphogenesis;membrane;lateral plasma membrane;structural molecule activity;apicolateral plasma membrane;response to hypoxia;bicellular tight junction assembly;calcium-independent cell-cell adhesion via plasma membra…	K06087	CLDN	http://www.genome.jp/dbget-bin/www_bget?ko:K06087	Tight junction;Cell adhesion molecules (CAMs);Leukocyte transendothelial migration	ko04530,ko04514,ko04670	-	gnl|BL_ORD_ID|333335	sp|Q95KM5|CLD3_CANLF Claudin-3 OS=Canis lupus familiaris GN=CLDN3 PE=2 SV=1
LOC102458879	1.77735	1.73006	1.26269	1.81624	2.01824	2.12594	1.70697	1.79581	1.80393	1.82737	1.9135	1.72843	1.91724	1.93495	1.51759	2.05721	1.59229	1.46909	PREDICTED: claudin-9 [Pelodiscus sinensis]	GO:0016020;GO:0005886;GO:0005198;GO:0030054;GO:0005923;GO:0016021	membrane;plasma membrane;structural molecule activity;cell junction;bicellular tight junction;integral component of membrane	K06087	CLDN	http://www.genome.jp/dbget-bin/www_bget?ko:K06087	Tight junction;Cell adhesion molecules (CAMs);Leukocyte transendothelial migration	ko04530,ko04514,ko04670	-	gnl|BL_ORD_ID|327803;sp|O95484|CLD9_HUMAN;sp|Q9Z0S7|CLD9_MOUSE	sp|Q9Z0S7|CLD9_MOUSE Claudin-9 OS=Mus musculus GN=Cldn9 PE=2 SV=2;sp|O95484|CLD9_HUMAN Claudin-9 OS=Homo sapiens GN=CLDN9 PE=1 SV=1;sp|Q9Z0S7|CLD9_MOUSE Claudin-9 OS=Mus musculus GN=Cldn9 PE=2 SV=2
LOC102460547	2.78992	2.66053	2.69218	3.42449	3.39805	3.55531	3.04881	3.11499	3.15927	3.08538	3.11549	3.11201	2.88763	3.01344	2.65447	2.8929	2.58841	2.82307	PREDICTED: claudin-9-like [Pelodiscus sinensis]	GO:0016020;GO:0005886;GO:0005198;GO:0030054;GO:0005923;GO:0016021	membrane;plasma membrane;structural molecule activity;cell junction;bicellular tight junction;integral component of membrane	K06087	CLDN	http://www.genome.jp/dbget-bin/www_bget?ko:K06087	Tight junction;Cell adhesion molecules (CAMs);Leukocyte transendothelial migration	ko04530,ko04514,ko04670	-	sp|O95484|CLD9_HUMAN;gnl|BL_ORD_ID|330135	sp|O95484|CLD9_HUMAN Claudin-9 OS=Homo sapiens GN=CLDN9 PE=1 SV=1;sp|O95484|CLD9_HUMAN Claudin-9 OS=Homo sapiens GN=CLDN9 PE=1 SV=1
CRB3	1.40088	1.36267	1.44122	1.58377	1.73862	1.63579	1.58195	1.61023	1.56538	1.617	1.74155	1.38148	1.97754	2.09286	2.05285	1.8638	1.95569	1.91529	PREDICTED: protein crumbs homolog 3 [Pelodiscus sinensis]	GO:0042491;GO:0016021;GO:0016020	auditory receptor cell differentiation;integral component of membrane;membrane	K06090	CRB3	http://www.genome.jp/dbget-bin/www_bget?ko:K06090	Tight junction	ko04530	-	gnl|BL_ORD_ID|339008;sp|Q9BUF7|CRUM3_HUMAN	sp|Q9BUF7|CRUM3_HUMAN Protein crumbs homolog 3 OS=Homo sapiens GN=CRB3 PE=1 SV=3;sp|Q9BUF7|CRUM3_HUMAN Protein crumbs homolog 3 OS=Homo sapiens GN=CRB3 PE=1 SV=3
DIO1	1.745	1.63739	1.77034	1.09691	1.58961	1.28981	2.05633	1.98214	1.91561	1.98874	1.95226	1.86641	1.58647	2.05549	2.11113	1.62603	1.78433	1.87933	PREDICTED: type I iodothyronine deiodinase isoform X2 [Pelodiscus sinensis];PREDICTED: type I iodothyronine deiodinase isoform X1 [Pelodiscus sinensis]	-	-	K01562	DIO1	http://www.genome.jp/dbget-bin/www_bget?ko:K01562	Thyroid hormone signaling pathway	ko04919	-	gnl|BL_ORD_ID|49276;sp|O42411|IOD1_CHICK	sp|O42411|IOD1_CHICK Type I iodothyronine deiodinase (Fragment) OS=Gallus gallus GN=DIO1 PE=2 SV=3;sp|O42411|IOD1_CHICK Type I iodothyronine deiodinase (Fragment) OS=Gallus gallus GN=DIO1 PE=2 SV=3
MPST	1.7626	1.70036	1.55691	1.71983	1.69949	1.72989	1.98272	1.88349	1.90439	1.98318	1.82465	1.89779	1.77173	2.00458	1.96052	1.85144	1.83257	1.95458	PREDICTED: LOW QUALITY PROTEIN: 3-mercaptopyruvate sulfurtransferase [Pelodiscus sinensis]	-	-	K01011	TST,MPST,sseA	http://www.genome.jp/dbget-bin/www_bget?ko:K01011	Sulfur relay system;Cysteine and methionine metabolism;Sulfur metabolism	ko04122,ko00270,ko00920	KOG1529(V)(Mercaptopyruvate sulfurtransferase/thiosulfate sulfurtransferase)	sp|P25325|THTM_HUMAN;gnl|BL_ORD_ID|511555	sp|P25325|THTM_HUMAN 3-mercaptopyruvate sulfurtransferase OS=Homo sapiens GN=MPST PE=1 SV=3;sp|P25325|THTM_HUMAN 3-mercaptopyruvate sulfurtransferase OS=Homo sapiens GN=MPST PE=1 SV=3
ISYNA1	2.06296	2.25239	2.07188	2.62041	2.31498	2.3886	2.74697	2.61752	2.93409	2.97374	3.11898	2.75208	3.67063	3.58411	4.07326	3.88095	3.62682	3.67035	PREDICTED: LOW QUALITY PROTEIN: inositol-3-phosphate synthase 1 [Pelodiscus sinensis]	-	-	K01858	INO1,ISYNA1	http://www.genome.jp/dbget-bin/www_bget?ko:K01858	Streptomycin biosynthesis;Inositol phosphate metabolism	ko00521,ko00562	KOG0693(I)(Myo-inositol-1-phosphate synthase)	sp|Q7ZXY0|INO1A_XENLA;gnl|BL_ORD_ID|52007	sp|Q7ZXY0|INO1A_XENLA Inositol-3-phosphate synthase 1-A OS=Xenopus laevis GN=isyna1-a PE=2 SV=1;sp|Q2NL29|INO1_BOVIN Inositol-3-phosphate synthase 1 OS=Bos taurus GN=ISYNA1 PE=2 SV=1
LOC102444001	2.23106	1.87058	2.1747	2.20507	2.44599	2.49328	2.42766	2.44579	2.52046	2.50852	2.6715	2.33692	2.48022	2.56036	2.82645	2.32968	2.3662	2.53696	PREDICTED: retinol dehydrogenase 16-like, partial [Pelodiscus sinensis];PREDICTED: 17-beta-hydroxysteroid dehydrogenase type 6-like [Pelodiscus sinensis]	-	-	K13369	HSD17B6	http://www.genome.jp/dbget-bin/www_bget?ko:K13369	Steroid hormone biosynthesis;Retinol metabolism	ko00140,ko00830	KOG1610(QR)(Corticosteroid 11-beta-dehydrogenase and related short chain-type dehydrogenases)	gnl|BL_ORD_ID|36352;sp|O75452|RDH16_HUMAN;sp|O14756|H17B6_HUMAN	sp|O14756|H17B6_HUMAN 17-beta-hydroxysteroid dehydrogenase type 6 OS=Homo sapiens GN=HSD17B6 PE=1 SV=1;sp|O75452|RDH16_HUMAN Retinol dehydrogenase 16 OS=Homo sapiens GN=RDH16 PE=1 SV=2;sp|O14756|H17B6_HUMAN 17-beta-hydroxysteroid dehydrogenase type 6 OS=Homo sapiens GN=HSD17B6 PE=1 SV=1
LOC102453351	2.36244	1.97313	2.19844	2.08636	2.42234	2.29343	2.48156	2.58045	2.5539	2.56477	2.44863	2.48532	2.38274	2.63212	2.87404	2.42604	2.3458	2.44539	PREDICTED: 17-beta-hydroxysteroid dehydrogenase type 6-like [Pelodiscus sinensis]	-	-	K13369	HSD17B6	http://www.genome.jp/dbget-bin/www_bget?ko:K13369	Steroid hormone biosynthesis;Retinol metabolism	ko00140,ko00830	KOG1610(QR)(Corticosteroid 11-beta-dehydrogenase and related short chain-type dehydrogenases)	gnl|BL_ORD_ID|36352;sp|O14756|H17B6_HUMAN	sp|O14756|H17B6_HUMAN 17-beta-hydroxysteroid dehydrogenase type 6 OS=Homo sapiens GN=HSD17B6 PE=1 SV=1;sp|O14756|H17B6_HUMAN 17-beta-hydroxysteroid dehydrogenase type 6 OS=Homo sapiens GN=HSD17B6 PE=1 SV=1
LOC102454079	1.81571	1.76305	1.85285	1.71391	1.93601	1.7421	2.15728	2.18811	2.21307	2.16791	2.18307	2.07737	2.16224	2.44796	2.53767	2.21738	2.21872	2.33989	PREDICTED: 17-beta-hydroxysteroid dehydrogenase type 6-like [Pelodiscus sinensis]	-	-	K13369	HSD17B6	http://www.genome.jp/dbget-bin/www_bget?ko:K13369	Steroid hormone biosynthesis;Retinol metabolism	ko00140,ko00830	KOG1610(QR)(Corticosteroid 11-beta-dehydrogenase and related short chain-type dehydrogenases)	sp|P50169|RDH3_RAT;sp|Q3T001|H17B6_BOVIN;gnl|BL_ORD_ID|28758	sp|P50169|RDH3_RAT Retinol dehydrogenase 3 OS=Rattus norvegicus GN=Rdh3 PE=1 SV=1;sp|Q3T001|H17B6_BOVIN 17-beta-hydroxysteroid dehydrogenase type 6 OS=Bos taurus GN=HSD17B6 PE=2 SV=1;sp|Q3T001|H17B6_BOVIN 17-beta-hydroxysteroid dehydrogenase type 6 OS=Bos taurus GN=HSD17B6 PE=2 SV=1
LOC102459465	1.9993	1.83639	1.74084	1.64137	1.96133	1.67339	1.7558	2.26036	1.91482	1.91761	2.212	2.11578	1.64345	2.46199	2.32062	1.78219	1.98345	1.92283	PREDICTED: corticosteroid 11-beta-dehydrogenase isozyme 1-like isoform X2 [Pelodiscus sinensis];PREDICTED: corticosteroid 11-beta-dehydrogenase isozyme 1-like isoform X1 [Pelodiscus sinensis]<>XP_006118821.1 PREDICTED: corticosteroid 11-beta-dehydrogenase isozyme 1-like isoform X1 [Pelodiscus sinensis]<>XP_006118822.1 PREDICTED: corticosteroid 11-beta-dehydrogenase isozyme 1-like isoform X1 [Pelo…	GO:0016491	oxidoreductase activity	K15680	HSD11B1	http://www.genome.jp/dbget-bin/www_bget?ko:K15680	Steroid hormone biosynthesis;Metabolism of xenobiotics by cytochrome P450	ko00140,ko00980	KOG1210(Q)(Predicted 3-ketosphinganine reductase);KOG0725(R)(Reductases with broad range of substrate specificities)	gnl|BL_ORD_ID|356306;gnl|BL_ORD_ID|358125;sp|P28845|DHI1_HUMAN	sp|P28845|DHI1_HUMAN Corticosteroid 11-beta-dehydrogenase isozyme 1 OS=Homo sapiens GN=HSD11B1 PE=1 SV=3;sp|Q29608|DHI1_SAISC Corticosteroid 11-beta-dehydrogenase isozyme 1 OS=Saimiri sciureus GN=HSD11B1 PE=2 SV=3;sp|P28845|DHI1_HUMAN Corticosteroid 11-beta-dehydrogenase isozyme 1 OS=Homo sapiens GN=HSD11B1 PE=1 SV=3
EBP	1.80564	1.67043	1.56086	1.38578	1.80421	1.62469	1.95109	1.92952	1.98421	2.04766	2.02514	1.88053	2.13545	2.41323	2.51518	2.13088	2.18991	2.10853	PREDICTED: 3-beta-hydroxysteroid-Delta(8),Delta(7)-isomerase, partial [Pelodiscus sinensis]	GO:0016125;GO:0016126;GO:0000247;GO:0016021;GO:0016020;GO:0047750;GO:0016853;GO:0005783;GO:0030097	sterol metabolic process;sterol biosynthetic process;C-8 sterol isomerase activity;integral component of membrane;membrane;cholestenol delta-isomerase activity;isomerase activity;endoplasmic reticulum;hemopoiesis	K01824	EBP	http://www.genome.jp/dbget-bin/www_bget?ko:K01824	Steroid biosynthesis	ko00100	-	gnl|BL_ORD_ID|374526	sp|Q15125|EBP_HUMAN 3-beta-hydroxysteroid-Delta(8),Delta(7)-isomerase OS=Homo sapiens GN=EBP PE=1 SV=3
EFTUD2	1.61363	1.48444	1.50907	1.99251	1.88824	1.82432	1.86558	1.79955	1.85685	1.84807	1.8687	1.92236	1.40637	1.57206	1.52192	1.63988	1.57438	1.61742	PREDICTED: 116 kDa U5 small nuclear ribonucleoprotein component isoform X2 [Pelodiscus sinensis]<>XP_014424655.1 PREDICTED: 116 kDa U5 small nuclear ribonucleoprotein component isoform X1 [Pelodiscus sinensis]<>XP_014424669.1 PREDICTED: 116 kDa U5 small nuclear ribonucleoprotein component isoform X1 [Pelodiscus sinensis]	GO:0016020;GO:0005737;GO:0015030;GO:0005654;GO:0044822;GO:0005622;GO:0016607;GO:0003924;GO:0006412;GO:0008380;GO:0005525;GO:0005681;GO:0000166;GO:0031012;GO:0006397;GO:0005634;GO:0071013;GO:0030529;GO:0019013	membrane;cytoplasm;Cajal body;nucleoplasm;RNA binding;intracellular;nuclear speck;GTPase activity;translation;RNA splicing;GTP binding;spliceosomal complex;nucleotide binding;extracellular matrix;mRNA processing;nucleus;catalytic step 2 spliceosome;intracellular ribonucleoprotein complex;viral nucleocapsid	K12852	EFTUD2	http://www.genome.jp/dbget-bin/www_bget?ko:K12852	Spliceosome	ko03040	KOG0469(J)(Elongation factor 2)	sp|Q5F3X4|U5S1_CHICK;gnl|BL_ORD_ID|232469	sp|Q5F3X4|U5S1_CHICK 116 kDa U5 small nuclear ribonucleoprotein component OS=Gallus gallus GN=EFTUD2 PE=2 SV=1;sp|Q5F3X4|U5S1_CHICK 116 kDa U5 small nuclear ribonucleoprotein component OS=Gallus gallus GN=EFTUD2 PE=2 SV=1
HNRNPA1	3.04311	3.03873	3.13728	3.24436	3.10116	3.17143	2.8836	2.95751	3.03075	2.9404	2.99962	3.09219	2.48262	2.44354	2.3965	2.5699	2.64436	2.66466	PREDICTED: LOW QUALITY PROTEIN: heterogeneous nuclear ribonucleoprotein A1-like [Sturnus vulgaris];PREDICTED: heterogeneous nuclear ribonucleoprotein A1 isoform X2 [Chrysemys picta bellii]	-	-	K12741	HNRNPA1_3	http://www.genome.jp/dbget-bin/www_bget?ko:K12741	Spliceosome	ko03040	-	sp|P09867|ROA1_BOVIN;sp|P09651|ROA1_HUMAN;gnl|BL_ORD_ID|184346	sp|P09867|ROA1_BOVIN Heterogeneous nuclear ribonucleoprotein A1 OS=Bos taurus GN=HNRNPA1 PE=1 SV=2;sp|P09651|ROA1_HUMAN Heterogeneous nuclear ribonucleoprotein A1 OS=Homo sapiens GN=HNRNPA1 PE=1 SV=5;sp|P09651|ROA1_HUMAN Heterogeneous nuclear ribonucleoprotein A1 OS=Homo sapiens GN=HNRNPA1 PE=1 SV=5
PRPF31	1.80781	1.91158	1.98358	2.30739	2.17214	2.24386	1.85022	1.92221	2.00152	1.91808	1.94072	1.98322	1.97777	1.90998	1.85285	2.02296	2.00505	2.02706	PREDICTED: U4/U6 small nuclear ribonucleoprotein Prp31 [Pelodiscus sinensis];PREDICTED: U4/U6 small nuclear ribonucleoprotein Prp31 isoform X2 [Alligator mississippiensis]	GO:0016607;GO:0043021;GO:0015030;GO:0044822;GO:0005690;GO:0071339;GO:0070990;GO:0071166;GO:0030621;GO:0071011;GO:0097526;GO:0000398;GO:0030622;GO:0046540;GO:0005634;GO:0000244;GO:0005687	nuclear speck;ribonucleoprotein complex binding;Cajal body;RNA binding;U4atac snRNP;MLL1 complex;snRNP binding;ribonucleoprotein complex localization;U4 snRNA binding;precatalytic spliceosome;spliceosomal tri-snRNP complex;mRNA splicing, via spliceosome;U4atac snRNA binding;U4/U6 x U5 tri-snRNP complex;nucleus;spliceosomal tri-snRNP complex assembly;U4 snRNP	K12844	PRPF31	http://www.genome.jp/dbget-bin/www_bget?ko:K12844	Spliceosome	ko03040	KOG2574(A)(mRNA splicing factor PRP31)	gnl|BL_ORD_ID|144946;sp|Q8WWY3|PRP31_HUMAN	sp|Q8WWY3|PRP31_HUMAN U4/U6 small nuclear ribonucleoprotein Prp31 OS=Homo sapiens GN=PRPF31 PE=1 SV=2;sp|Q8WWY3|PRP31_HUMAN U4/U6 small nuclear ribonucleoprotein Prp31 OS=Homo sapiens GN=PRPF31 PE=1 SV=2
RBMX	2.33734	2.25305	2.22484	2.4827	2.39524	2.42589	2.27277	2.34676	2.2938	2.2966	2.23995	2.32705	1.86576	1.94181	1.86326	1.86741	1.98945	1.92588	RNA-binding motif protein, X chromosome isoform B [Alligator mississippiensis];RNA-binding motif protein, X chromosome isoform A [Alligator mississippiensis]	GO:0030529;GO:0003723;GO:0000166;GO:0003676;GO:0019013	intracellular ribonucleoprotein complex;RNA binding;nucleotide binding;nucleic acid binding;viral nucleocapsid	K12885	RBMX,HNRNPG	http://www.genome.jp/dbget-bin/www_bget?ko:K12885	Spliceosome	ko03040	-	sp|Q96E39|RMXL1_HUMAN;gnl|BL_ORD_ID|173574	sp|Q96E39|RMXL1_HUMAN RNA binding motif protein, X-linked-like-1 OS=Homo sapiens GN=RBMXL1 PE=1 SV=1;sp|Q96E39|RMXL1_HUMAN RNA binding motif protein, X-linked-like-1 OS=Homo sapiens GN=RBMXL1 PE=1 SV=1
SF3B4	1.63144	1.40157	1.52114	1.94954	1.94753	1.81111	1.83353	1.82666	1.79155	1.82484	1.94101	1.93616	1.44389	1.60195	1.6981	1.67706	1.5302	1.58035	Splicing factor 3B subunit 4 [Tupaia chinensis]<>KFO18187.1 Splicing factor 3B subunit 4 [Fukomys damarensis];Splicing factor 3B subunit 4, partial [Caprimulgus carolinensis];PREDICTED: splicing factor 3B subunit 4 [Aquila chrysaetos canadensis]	GO:0008150;GO:0044822;GO:0008380;GO:0003723;GO:0003674;GO:0005681;GO:0000166;GO:0005575;GO:0006397;GO:0003676;GO:0005689;GO:0005634;GO:0048026	biological_process;RNA binding;RNA splicing;RNA binding;molecular_function;spliceosomal complex;nucleotide binding;cellular_component;mRNA processing;nucleic acid binding;U12-type spliceosomal complex;nucleus;positive regulation of mRNA splicing, via spliceosome	K12831	SF3B4,SAP49	http://www.genome.jp/dbget-bin/www_bget?ko:K12831	Spliceosome	ko03040	KOG0131(A)(Splicing factor 3b, subunit 4)	gnl|BL_ORD_ID|200588;sp|Q8QZY9|SF3B4_MOUSE	sp|Q8QZY9|SF3B4_MOUSE Splicing factor 3B subunit 4 OS=Mus musculus GN=Sf3b4 PE=1 SV=1;sp|Q8QZY9|SF3B4_MOUSE Splicing factor 3B subunit 4 OS=Mus musculus GN=Sf3b4 PE=1 SV=1
SF3B5	1.85956	1.78376	1.87604	2.31511	2.2968	2.35394	1.96937	2.10954	2.11317	2.03933	1.98579	2.02457	2.0732	2.01448	1.94443	2.0086	2.12434	1.97804	PREDICTED: splicing factor 3B subunit 5 [Alligator mississippiensis];PREDICTED: splicing factor 3B subunit 5 [Geospiza fortis]	GO:0005686;GO:0005654;GO:0008380;GO:0005681;GO:0006397;GO:0071011;GO:0000398;GO:0005689;GO:0005634	U2 snRNP;nucleoplasm;RNA splicing;spliceosomal complex;mRNA processing;precatalytic spliceosome;mRNA splicing, via spliceosome;U12-type spliceosomal complex;nucleus	K12832	SF3B5,SF3B10	http://www.genome.jp/dbget-bin/www_bget?ko:K12832	Spliceosome	ko03040	KOG3485(S)(Uncharacterized conserved protein)	sp|Q56K13|SF3B5_BOVIN;gnl|BL_ORD_ID|202466	sp|Q56K13|SF3B5_BOVIN Splicing factor 3B subunit 5 OS=Bos taurus GN=SF3B5 PE=3 SV=1;sp|Q56K13|SF3B5_BOVIN Splicing factor 3B subunit 5 OS=Bos taurus GN=SF3B5 PE=3 SV=1
SNRPA	1.94993	1.7905	1.92262	2.32732	2.24514	2.22786	1.88801	1.95655	2.01957	1.908	1.97192	2.03751	1.81425	1.75066	1.71181	1.77019	1.79414	1.82607	PREDICTED: U1 small nuclear ribonucleoprotein A [Notothenia coriiceps];PREDICTED: U1 small nuclear ribonucleoprotein A isoform X2 [Erinaceus europaeus];PREDICTED: LOW QUALITY PROTEIN: U1 small nuclear ribonucleoprotein A [Callithrix jacchus];PREDICTED: U1 small nuclear ribonucleoprotein A [Pelodiscus sinensis]	GO:0005737;GO:0005654;GO:0017069;GO:0005730;GO:0030529;GO:0044822;GO:0003723;GO:0005685;GO:0005681;GO:0000166;GO:0003676;GO:0000398;GO:0019013	cytoplasm;nucleoplasm;snRNA binding;nucleolus;intracellular ribonucleoprotein complex;RNA binding;RNA binding;U1 snRNP;spliceosomal complex;nucleotide binding;nucleic acid binding;mRNA splicing, via spliceosome;viral nucleocapsid	K11091	SNRPA	http://www.genome.jp/dbget-bin/www_bget?ko:K11091	Spliceosome	ko03040	KOG4206(A)(Spliceosomal protein snRNP-U1A/U2B);KOG0114(R)(Predicted RNA-binding protein (RRM superfamily))	sp|P45429|SNRPA_XENLA;gnl|BL_ORD_ID|203865;sp|Q2KIR1|SNRPA_BOVIN	sp|P45429|SNRPA_XENLA U1 small nuclear ribonucleoprotein A OS=Xenopus laevis GN=snrpa PE=2 SV=1;sp|P45429|SNRPA_XENLA U1 small nuclear ribonucleoprotein A OS=Xenopus laevis GN=snrpa PE=2 SV=1;sp|Q2KIR1|SNRPA_BOVIN U1 small nuclear ribonucleoprotein A OS=Bos taurus GN=SNRPA PE=2 SV=1
SNRPB	2.62682	2.47028	2.56379	3.02011	2.80647	2.90919	2.55664	2.63931	2.63712	2.55503	2.61588	2.6277	2.35077	2.3179	2.22866	2.29826	2.32141	2.40403	PREDICTED: small nuclear ribonucleoprotein-associated proteins B and B' isoform X1 [Alligator mississippiensis];PREDICTED: small nuclear ribonucleoprotein-associated protein B' [Leptosomus discolor]	GO:0005685;GO:0005686;GO:0005737;GO:0034719;GO:0000398;GO:0071004;GO:0008380;GO:0003723;GO:0046540;GO:0005829;GO:0006397;GO:0005634;GO:0034709;GO:0005687;GO:0071013;GO:0030529;GO:0005682;GO:0019013;GO:0000387	U1 snRNP;U2 snRNP;cytoplasm;SMN-Sm protein complex;mRNA splicing, via spliceosome;U2-type prespliceosome;RNA splicing;RNA binding;U4/U6 x U5 tri-snRNP complex;cytosol;mRNA processing;nucleus;methylosome;U4 snRNP;catalytic step 2 spliceosome;intracellular ribonucleoprotein complex;U5 snRNP;viral nucleocapsid;spliceosomal snRNP assembly	K11086	SNRPB,SMB	http://www.genome.jp/dbget-bin/www_bget?ko:K11086	Spliceosome	ko03040	KOG1784(A)(Small Nuclear ribonucleoprotein splicing factor)	gnl|BL_ORD_ID|471744;sp|Q9PV94|RSMB_CHICK	sp|Q9PV94|RSMB_CHICK Small nuclear ribonucleoprotein-associated protein B' OS=Gallus gallus GN=SNRPB PE=2 SV=1;sp|Q9PV94|RSMB_CHICK Small nuclear ribonucleoprotein-associated protein B' OS=Gallus gallus GN=SNRPB PE=2 SV=1
SNRPC	2.09086	2.01783	2.07357	2.12892	2.03711	2.22074	1.96525	1.98268	2.04571	2.01803	1.99974	1.9716	1.62459	1.77851	1.75113	1.61183	1.73062	1.75189	U1 small nuclear ribonucleoprotein C [Larimichthys crocea];PREDICTED: U1 small nuclear ribonucleoprotein C [Pelodiscus sinensis];PREDICTED: U1 small nuclear ribonucleoprotein C [Nipponia nippon];PREDICTED: uncharacterized protein LOC103605613 [Galeopterus variegatus];PREDICTED: U1 small nuclear ribonucleoprotein C [Falco peregrinus]<>XP_014141978.1 PREDICTED: U1 small nuclear ribonucleoprotein C …	GO:0000381;GO:0005654;GO:0000395;GO:0030529;GO:0030619;GO:0015030;GO:0044822;GO:0071004;GO:0000243;GO:0003723;GO:0000387;GO:0005685;GO:0003729;GO:0042803;GO:0003676;GO:0071010;GO:0005515;GO:0000398;GO:1990446;GO:0008270;GO:0003727;GO:0005634;GO:0046872;GO:0030627	regulation of alternative mRNA splicing, via spliceosome;nucleoplasm;mRNA 5'-splice site recognition;intracellular ribonucleoprotein complex;U1 snRNA binding;Cajal body;RNA binding;U2-type prespliceosome;commitment complex;RNA binding;spliceosomal snRNP assembly;U1 snRNP;mRNA binding;protein homodimerization activity;nucleic acid binding;prespliceosome;protein binding;mRNA splicing, via spliceoso…	K11095	SNRPC	http://www.genome.jp/dbget-bin/www_bget?ko:K11095	Spliceosome	ko03040	KOG3454(A)(U1 snRNP-specific protein C)	sp|E1C6F0|RU1C_CHICK;sp|Q62241|RU1C_MOUSE;gnl|BL_ORD_ID|483671	sp|E1C6F0|RU1C_CHICK U1 small nuclear ribonucleoprotein C OS=Gallus gallus GN=SNRPC PE=3 SV=1;sp|Q62241|RU1C_MOUSE U1 small nuclear ribonucleoprotein C OS=Mus musculus GN=Snrpc PE=1 SV=1;sp|Q62241|RU1C_MOUSE U1 small nuclear ribonucleoprotein C OS=Mus musculus GN=Snrpc PE=1 SV=1
SNRPF	2.7166	2.72966	2.80114	3.02517	2.76299	2.96662	2.60226	2.73989	2.68546	2.66733	2.63446	2.73835	2.45665	2.44638	2.30086	2.37756	2.5546	2.49798	PREDICTED: small nuclear ribonucleoprotein F-like [Chrysemys picta bellii]	GO:0005737;GO:0034709;GO:0071013;GO:0034715;GO:0030529;GO:0008380;GO:0003723;GO:0005829;GO:0000387;GO:0005685;GO:0034719;GO:0005681;GO:0006397;GO:0000398;GO:0005689;GO:0005683;GO:0005634;GO:0005732;GO:0005687;GO:0030532	cytoplasm;methylosome;catalytic step 2 spliceosome;pICln-Sm protein complex;intracellular ribonucleoprotein complex;RNA splicing;RNA binding;cytosol;spliceosomal snRNP assembly;U1 snRNP;SMN-Sm protein complex;spliceosomal complex;mRNA processing;mRNA splicing, via spliceosome;U12-type spliceosomal complex;U7 snRNP;nucleus;small nucleolar ribonucleoprotein complex;U4 snRNP;small nuclear ribonucleo…	K11098	SNRPF,SMF	http://www.genome.jp/dbget-bin/www_bget?ko:K11098	Spliceosome	ko03040	KOG1783(A)(Small nuclear ribonucleoprotein F)	gnl|BL_ORD_ID|482893	sp|Q3T0Z8|RUXF_BOVIN Small nuclear ribonucleoprotein F OS=Bos taurus GN=SNRPF PE=3 SV=2
SNRPG	2.7485	2.83929	2.73261	3.04966	2.81782	3.04611	2.73942	2.87561	2.79847	2.76545	2.69749	2.85073	2.53361	2.46048	2.36146	2.40698	2.53047	2.54178	PREDICTED: small nuclear ribonucleoprotein G [Alligator sinensis]<>XP_006129156.1 PREDICTED: small nuclear ribonucleoprotein G [Pelodiscus sinensis]<>XP_014465292.1 PREDICTED: small nuclear ribonucleoprotein G isoform X1 [Alligator mississippiensis]<>XP_014465293.1 PREDICTED: small nuclear ribonucleoprotein G isoform X1 [Alligator mississippiensis]<>XP_014465295.1 PREDICTED: small nuclear ribonuc…	GO:0005686;GO:0005737;GO:0005654;GO:0008150;GO:0005739;GO:0034709;GO:0071013;GO:0030529;GO:0005682;GO:0044822;GO:0071004;GO:0008380;GO:0003723;GO:0005829;GO:0000245;GO:0000387;GO:0005685;GO:0034719;GO:0008334;GO:0003674;GO:0005681;GO:0006397;GO:0005515;GO:0043186;GO:0071011;GO:0097526;GO:0000398;GO:0005683;GO:0005689;GO:1990446;GO:0006369;GO:0005732;GO:0051170;GO:0005687;GO:0030532;GO:0019013	U2 snRNP;cytoplasm;nucleoplasm;biological_process;mitochondrion;methylosome;catalytic step 2 spliceosome;intracellular ribonucleoprotein complex;U5 snRNP;RNA binding;U2-type prespliceosome;RNA splicing;RNA binding;cytosol;spliceosomal complex assembly;spliceosomal snRNP assembly;U1 snRNP;SMN-Sm protein complex;histone mRNA metabolic process;molecular_function;spliceosomal complex;mRNA processing;…	K11099	SNRPG,SMG	http://www.genome.jp/dbget-bin/www_bget?ko:K11099	Spliceosome	ko03040	KOG1780(A)(Small Nuclear ribonucleoprotein G)	sp|Q9CR98|F136A_MOUSE;gnl|BL_ORD_ID|491729	sp|Q9CR98|F136A_MOUSE Protein FAM136A OS=Mus musculus GN=Fam136a PE=1 SV=1;sp|P62308|RUXG_HUMAN Small nuclear ribonucleoprotein G OS=Homo sapiens GN=SNRPG PE=1 SV=1
SRSF6	2.11896	2.13704	2.15993	2.2085	2.07802	2.13367	1.85497	1.89315	2.00949	1.91944	1.97016	1.95842	1.68169	1.60821	1.68583	1.81345	1.82033	1.8262	PREDICTED: serine/arginine-rich splicing factor 6 [Alligator sinensis];PREDICTED: serine/arginine-rich splicing factor 6-like [Ornithorhynchus anatinus];PREDICTED: serine/arginine-rich splicing factor 6 [Chrysemys picta bellii]	-	-	K12893	SFRS4_5_6	http://www.genome.jp/dbget-bin/www_bget?ko:K12893	Spliceosome	ko03040	KOG0106(A)(Alternative splicing factor SRp55/B52/SRp75 (RRM superfamily))	gnl|BL_ORD_ID|209398	sp|Q3TWW8|SRSF6_MOUSE Serine/arginine-rich splicing factor 6 OS=Mus musculus GN=Srsf6 PE=1 SV=1
U2AF2	2.12103	1.94221	1.96152	2.42747	2.45965	2.44943	2.41729	2.44719	2.47615	2.39853	2.47968	2.54357	2.23792	2.30289	2.24692	2.32044	2.28405	2.30946	Splicing factor U2AF 65 kDa subunit, partial [Bos mutus];PREDICTED: splicing factor U2AF 65 kDa subunit [Pelodiscus sinensis]	GO:0089701;GO:1903955;GO:0000974;GO:0005654;GO:0016607;GO:0033120;GO:0070742;GO:0044822;GO:0071004;GO:0008380;GO:0000243;GO:0003723;GO:0048025;GO:0008187;GO:0005681;GO:0000166;GO:0006397;GO:0003676;GO:0005515;GO:0000398;GO:0030628;GO:0005634;GO:1903146;GO:0019899	U2AF;positive regulation of protein targeting to mitochondrion;Prp19 complex;nucleoplasm;nuclear speck;positive regulation of RNA splicing;C2H2 zinc finger domain binding;RNA binding;U2-type prespliceosome;RNA splicing;commitment complex;RNA binding;negative regulation of mRNA splicing, via spliceosome;poly-pyrimidine tract binding;spliceosomal complex;nucleotide binding;mRNA processing;nucleic a…	K12837	U2AF2	http://www.genome.jp/dbget-bin/www_bget?ko:K12837	Spliceosome	ko03040	KOG0120(A)(Splicing factor U2AF, large subunit (RRM superfamily))	sp|P26368|U2AF2_HUMAN;gnl|BL_ORD_ID|236891;sp|P26369|U2AF2_MOUSE	sp|P26368|U2AF2_HUMAN Splicing factor U2AF 65 kDa subunit OS=Homo sapiens GN=U2AF2 PE=1 SV=4;sp|P26368|U2AF2_HUMAN Splicing factor U2AF 65 kDa subunit OS=Homo sapiens GN=U2AF2 PE=1 SV=4;sp|P26369|U2AF2_MOUSE Splicing factor U2AF 65 kDa subunit OS=Mus musculus GN=U2af2 PE=1 SV=3
CERS2	1.72378	1.67376	1.70944	1.61606	1.78025	1.75656	1.90434	1.80841	1.85327	1.93712	1.86028	1.85588	1.86147	2.00741	2.01233	1.83923	1.80113	2.00238	PREDICTED: ceramide synthase 2 [Pelodiscus sinensis]	GO:0031965;GO:0030148;GO:0003677;GO:0050291;GO:0016021;GO:0046513;GO:0016020;GO:0005783;GO:0005634	nuclear membrane;sphingolipid biosynthetic process;DNA binding;sphingosine N-acyltransferase activity;integral component of membrane;ceramide biosynthetic process;membrane;endoplasmic reticulum;nucleus	K04710	CERS	http://www.genome.jp/dbget-bin/www_bget?ko:K04710	Sphingolipid signaling pathway;Sphingolipid metabolism	ko04071,ko00600	KOG1607(U)(Protein transporter of the TRAM (translocating chain-associating membrane) superfamily)	sp|Q3ZBF8|CERS2_BOVIN;gnl|BL_ORD_ID|329570	sp|Q3ZBF8|CERS2_BOVIN Ceramide synthase 2 OS=Bos taurus GN=CERS2 PE=2 SV=1;sp|Q3ZBF8|CERS2_BOVIN Ceramide synthase 2 OS=Bos taurus GN=CERS2 PE=2 SV=1
S1PR2	1.27114	0.97635	1.25672	2.0228	2.11793	1.86534	1.68913	1.66642	1.63839	1.60282	1.72787	1.70398	1.82808	1.89215	1.52101	1.8206	1.59118	1.66266	PREDICTED: LOW QUALITY PROTEIN: sphingosine 1-phosphate receptor 2 [Pelodiscus sinensis]	GO:0038036;GO:0016021;GO:0007186;GO:0016020;GO:0004871;GO:0007165;GO:0004930	sphingosine-1-phosphate receptor activity;integral component of membrane;G-protein coupled receptor signaling pathway;membrane;signal transducer activity;signal transduction;G-protein coupled receptor activity	K04292	S1PR2,EDG5	http://www.genome.jp/dbget-bin/www_bget?ko:K04292	Sphingolipid signaling pathway;Neuroactive ligand-receptor interaction	ko04071,ko04080	-	gnl|BL_ORD_ID|489786	sp|O95136|S1PR2_HUMAN Sphingosine 1-phosphate receptor 2 OS=Homo sapiens GN=S1PR2 PE=1 SV=2
ID3	2.40543	2.21611	2.28463	2.7574	2.68493	2.68523	2.61974	2.64194	2.62157	2.60286	2.57646	2.71372	2.08174	2.05385	2.07558	2.21814	2.12927	2.13004	PREDICTED: DNA-binding protein inhibitor ID-3 [Pelodiscus sinensis]	GO:0043433;GO:0005737;GO:0046983;GO:0045668;GO:0003700;GO:0045892;GO:0005654;GO:0015630;GO:0045662;GO:0010629;GO:0042476;GO:0007623;GO:0001656;GO:0005634;GO:1901707;GO:0006351;GO:0019904;GO:0008134;GO:0030855	negative regulation of sequence-specific DNA binding transcription factor activity;cytoplasm;protein dimerization activity;negative regulation of osteoblast differentiation;transcription factor activity, sequence-specific DNA binding;negative regulation of transcription, DNA-templated;nucleoplasm;microtubule cytoskeleton;negative regulation of myoblast differentiation;negative regulation of gene …	K17694	ID3	http://www.genome.jp/dbget-bin/www_bget?ko:K17694	Signaling pathways regulating pluripotency of stem cells;TGF-beta signaling pathway	ko04550,ko04350	-	sp|Q91399|ID3A_XENLA;gnl|BL_ORD_ID|48198	sp|Q91399|ID3A_XENLA DNA-binding protein inhibitor ID-3-A OS=Xenopus laevis GN=id3-a PE=1 SV=1;sp|Q91399|ID3A_XENLA DNA-binding protein inhibitor ID-3-A OS=Xenopus laevis GN=id3-a PE=1 SV=1
ID2	2.03723	2.06577	1.9769	2.16406	2.01317	2.1903	2.15168	2.2173	2.15063	2.16379	2.0807	2.2601	1.62716	1.7124	1.52517	1.78944	1.78247	1.71475	PREDICTED: DNA-binding protein inhibitor ID-2 [Pelodiscus sinensis]	GO:0005737;GO:0043353;GO:0048557;GO:0005654;GO:0003677;GO:0001656;GO:0045665;GO:0043234;GO:0046983;GO:0045892;GO:0005829;GO:0032922;GO:0044325;GO:2000045;GO:0043433;GO:0003149;GO:0045668;GO:0005634;GO:0005813	cytoplasm;enucleate erythrocyte differentiation;embryonic digestive tract morphogenesis;nucleoplasm;DNA binding;metanephros development;negative regulation of neuron differentiation;protein complex;protein dimerization activity;negative regulation of transcription, DNA-templated;cytosol;circadian regulation of gene expression;ion channel binding;regulation of G1/S transition of mitotic cell cycle…	K17693	ID2	http://www.genome.jp/dbget-bin/www_bget?ko:K17693	Signaling pathways regulating pluripotency of stem cells;Hippo signaling pathway;TGF-beta signaling pathway	ko04550,ko04390,ko04350	-	gnl|BL_ORD_ID|45066;sp|Q02363|ID2_HUMAN	sp|Q4R5J7|ID2_MACFA DNA-binding protein inhibitor ID-2 OS=Macaca fascicularis GN=ID2 PE=2 SV=1;sp|Q02363|ID2_HUMAN DNA-binding protein inhibitor ID-2 OS=Homo sapiens GN=ID2 PE=1 SV=1
APP	2.00043	2.07408	2.07412	1.93105	1.95056	1.92901	2.14579	2.16244	2.13564	2.26364	2.1747	2.17429	2.14345	2.08325	2.18073	2.15445	2.07911	2.14457	PREDICTED: amyloid beta A4 protein-like [Chrysemys picta bellii];PREDICTED: amyloid beta A4 protein isoform X5 [Calidris pugnax];PREDICTED: amyloid beta A4 protein isoform X4 [Gekko japonicus];PREDICTED: LOW QUALITY PROTEIN: amyloid beta A4 protein [Pelodiscus sinensis]	-	-	K04520	APP	http://www.genome.jp/dbget-bin/www_bget?ko:K04520	Serotonergic synapse	ko04726	KOG4597(O)(Serine proteinase inhibitor (KU family) with thrombospondin repeats);KOG3540(R)(Beta amyloid precursor protein)	sp|P08592|A4_RAT;gnl|BL_ORD_ID|263043;sp|Q95241|A4_SAISC;sp|Q60495|A4_CAVPO;sp|P79307|A4_PIG	sp|P08592|A4_RAT Amyloid beta A4 protein OS=Rattus norvegicus GN=App PE=1 SV=2;sp|Q95241|A4_SAISC Amyloid beta A4 protein OS=Saimiri sciureus GN=APP PE=2 SV=1;sp|Q95241|A4_SAISC Amyloid beta A4 protein OS=Saimiri sciureus GN=APP PE=2 SV=1;sp|Q60495|A4_CAVPO Amyloid beta A4 protein OS=Cavia porcellus GN=APP PE=1 SV=2;sp|P79307|A4_PIG Amyloid beta A4 protein OS=Sus scrofa GN=APP PE=2 SV=2
LOC102446816	1.38453	1.32797	2.22324	2.36521	2.29077	2.25833	1.33606	1.40756	2.10343	2.3154	2.27177	2.30788	0.992554	1.16047	1.18241	1.98807	2.07646	2.02629	GTP-binding nuclear protein Ran [Amazona aestiva];PREDICTED: LOW QUALITY PROTEIN: GTP-binding nuclear protein Ran [Chelonia mydas]	GO:0005737;GO:0015031;GO:1902570;GO:0070062;GO:0005654;GO:0019003;GO:0003924;GO:0006606;GO:0030496;GO:0005730;GO:0007264;GO:0006611;GO:0006810;GO:0006913;GO:0044822;GO:0000056;GO:0042565;GO:0005814;GO:0016020;GO:0032092;GO:0000055;GO:0007165;GO:0070883;GO:0000166;GO:0000054;GO:0000785;GO:0055037;GO:0006886;GO:0005525;GO:0005635;GO:0005634	cytoplasm;protein transport;protein localization to nucleolus;extracellular exosome;nucleoplasm;GDP binding;GTPase activity;protein import into nucleus;midbody;nucleolus;small GTPase mediated signal transduction;protein export from nucleus;transport;nucleocytoplasmic transport;RNA binding;ribosomal small subunit export from nucleus;RNA nuclear export complex;centriole;membrane;positive regulation…	K07936	RAN	http://www.genome.jp/dbget-bin/www_bget?ko:K07936	RNA transport;Ribosome biogenesis in eukaryotes	ko03013,ko03008	KOG0096(U)(GTPase Ran/TC4/GSP1 (nuclear protein transport pathway), small G protein superfamily)	gnl|BL_ORD_ID|153796	sp|P42558|RAN_CHICK GTP-binding nuclear protein Ran OS=Gallus gallus GN=RAN PE=2 SV=1
POP7	1.49527	1.36568	1.45818	1.7824	1.72575	1.81331	1.74147	1.6917	1.73062	1.71825	1.71029	1.69574	1.80693	1.83493	1.79106	1.83033	1.75496	1.77203	PREDICTED: ribonuclease P protein subunit p20 [Pelodiscus sinensis]	GO:0005737;GO:0004526;GO:0005730;GO:0008033;GO:0044822;GO:0003676;GO:0016787;GO:0005634;GO:0090502	cytoplasm;ribonuclease P activity;nucleolus;tRNA processing;RNA binding;nucleic acid binding;hydrolase activity;nucleus;RNA phosphodiester bond hydrolysis, endonucleolytic	K14527	RPP20,POP7	http://www.genome.jp/dbget-bin/www_bget?ko:K14527	RNA transport;Ribosome biogenesis in eukaryotes	ko03013,ko03008	-	sp|Q9DCH2|POP7_MOUSE;gnl|BL_ORD_ID|139350	sp|Q9DCH2|POP7_MOUSE Ribonuclease P protein subunit p20 OS=Mus musculus GN=Pop7 PE=2 SV=1;sp|Q9DCH2|POP7_MOUSE Ribonuclease P protein subunit p20 OS=Mus musculus GN=Pop7 PE=2 SV=1
SRRM1	1.83117	2.13824	2.15664	2.03028	1.93258	1.94191	1.68278	1.71046	1.76005	1.7485	1.81875	1.77107	1.81311	1.46835	1.47929	1.78618	1.7102	1.78561	hypothetical protein A6R68_07881 [Neotoma lepida];hypothetical protein CB1_001244045 [Camelus ferus];PREDICTED: LOW QUALITY PROTEIN: serine/arginine repetitive matrix protein 1 [Pelodiscus sinensis];PREDICTED: serine/arginine repetitive matrix protein 1 isoform X5 [Ornithorhynchus anatinus]	GO:0005654;GO:0016607;GO:0003677;GO:0071013;GO:0044822;GO:0000375;GO:0008380;GO:0006405;GO:0005829;GO:0016363;GO:0006397;GO:0031124;GO:0005515;GO:0000398;GO:0006406;GO:0006369;GO:0005634	nucleoplasm;nuclear speck;DNA binding;catalytic step 2 spliceosome;RNA binding;RNA splicing, via transesterification reactions;RNA splicing;RNA export from nucleus;cytosol;nuclear matrix;mRNA processing;mRNA 3'-end processing;protein binding;mRNA splicing, via spliceosome;mRNA export from nucleus;termination of RNA polymerase II transcription;nucleus	K13171	SRRM1,SRM160	http://www.genome.jp/dbget-bin/www_bget?ko:K13171	RNA transport;mRNA surveillance pathway	ko03013,ko03015	KOG2146(AR)(Splicing coactivator SRm160/300, subunit SRm160 (contains PWI domain))	sp|Q5ZMJ9|SRRM1_CHICK;sp|Q5R5Q2|SRRM1_PONAB;gnl|BL_ORD_ID|203769	sp|Q5ZMJ9|SRRM1_CHICK Serine/arginine repetitive matrix protein 1 OS=Gallus gallus GN=SRRM1 PE=2 SV=1;sp|Q5R5Q2|SRRM1_PONAB Serine/arginine repetitive matrix protein 1 OS=Pongo abelii GN=SRRM1 PE=2 SV=1;sp|Q5R5Q2|SRRM1_PONAB Serine/arginine repetitive matrix protein 1 OS=Pongo abelii GN=SRRM1 PE=2 SV=1
GEMIN7	2.01123	1.98381	1.96932	2.15884	1.94166	2.21376	1.81571	1.74617	1.97285	1.85431	1.76775	1.79768	1.95703	1.79546	1.77444	1.93364	1.6902	1.86894	PREDICTED: gem-associated protein 7 [Pelodiscus sinensis]	GO:0032797	SMN complex	K13135	GEMIN7,SIP3	http://www.genome.jp/dbget-bin/www_bget?ko:K13135	RNA transport	ko03013	-	gnl|BL_ORD_ID|12172	sp|Q9CWY4|GEMI7_MOUSE Gem-associated protein 7 OS=Mus musculus GN=Gemin7 PE=2 SV=1
POLR3K	1.75389	1.79239	1.69914	2.07962	1.85358	1.90849	1.60692	1.70355	1.72354	1.69557	1.6755	1.71307	1.72107	1.70535	1.66219	1.53908	1.6894	1.67247	PREDICTED: DNA-directed RNA polymerase III subunit RPC10 [Chrysemys picta bellii]<>XP_006124605.1 PREDICTED: DNA-directed RNA polymerase III subunit RPC10 [Pelodiscus sinensis]	-	-	K03019	RPC11,POLR3K	http://www.genome.jp/dbget-bin/www_bget?ko:K03019	RNA polymerase;Purine metabolism;Pyrimidine metabolism;Cytosolic DNA-sensing pathway	ko03020,ko00230,ko00240,ko04623	KOG1105(K)(Transcription elongation factor TFIIS/Cofactor of enhancer-binding protein Sp1)	gnl|BL_ORD_ID|180404	sp|Q9CQZ7|RPC10_MOUSE DNA-directed RNA polymerase III subunit RPC10 OS=Mus musculus GN=Polr3k PE=3 SV=1
BTG1	2.04731	2.21735	2.23752	2.0172	2.03655	2.11511	2.20839	2.20661	2.28206	2.2236	2.18963	2.20761	2.32222	2.34455	2.18047	2.34191	2.30792	2.27747	PREDICTED: protein BTG1 [Pelodiscus sinensis]	GO:0005737;GO:0008285;GO:0045663;GO:0045603;GO:0045766;GO:2000271;GO:0005634;GO:0019899	cytoplasm;negative regulation of cell proliferation;positive regulation of myoblast differentiation;positive regulation of endothelial cell differentiation;positive regulation of angiogenesis;positive regulation of fibroblast apoptotic process;nucleus;enzyme binding	K14443	TOB	http://www.genome.jp/dbget-bin/www_bget?ko:K14443	RNA degradation	ko03018	-	gnl|BL_ORD_ID|301746	sp|P34743|BTG1_CHICK Protein BTG1 OS=Gallus gallus GN=BTG1 PE=2 SV=1
EXOSC4	1.86469	1.81796	1.98927	1.90865	1.77048	1.91355	1.49192	1.54802	1.71667	1.54704	1.58749	1.60863	1.81829	1.68395	1.69984	1.79664	1.72378	1.66219	PREDICTED: exosome complex component RRP41 [Pelodiscus sinensis]	-	-	K11600	RRP41,EXOSC4,SKI6	http://www.genome.jp/dbget-bin/www_bget?ko:K11600	RNA degradation	ko03018	KOG1068(J)(Exosomal 3'-5' exoribonuclease complex, subunit Rrp41 and related exoribonucleases)	gnl|BL_ORD_ID|380000	sp|Q7YRA3|EXOS4_BOVIN Exosome complex component RRP41 OS=Bos taurus GN=EXOSC4 PE=2 SV=3
RQCD1	1.60863	1.45286	1.61962	1.99277	1.94473	1.89465	1.66436	1.63306	1.7574	1.64058	1.71975	1.72263	1.66219	1.60152	1.64365	1.65982	1.65772	1.70183	PREDICTED: cell differentiation protein RCD1 homolog isoform X1 [Pelodiscus sinensis];PREDICTED: cell differentiation protein RCD1 homolog isoform X2 [Pelodiscus sinensis]	-	-	K12606	RCD1,CNOT9,CAF40	http://www.genome.jp/dbget-bin/www_bget?ko:K12606	RNA degradation	ko03018	KOG3036(R)(Protein involved in cell differentiation/sexual development)	gnl|BL_ORD_ID|158853;sp|Q9JKY0|RCD1_MOUSE	sp|Q9JKY0|RCD1_MOUSE Cell differentiation protein RCD1 homolog OS=Mus musculus GN=Rqcd1 PE=1 SV=1;sp|Q9JKY0|RCD1_MOUSE Cell differentiation protein RCD1 homolog OS=Mus musculus GN=Rqcd1 PE=1 SV=1
CIRH1A	1.72074	1.52492	1.60412	2.18321	2.18253	2.15758	1.9174	1.83487	1.88446	1.92132	1.90747	1.94905	1.85205	1.79	1.76649	1.87552	1.89354	1.97918	PREDICTED: cirhin [Pelodiscus sinensis];PREDICTED: cirhin isoform X2 [Chlorocebus sabaeus]	-	-	K14548	UTP4,CIRH1A	http://www.genome.jp/dbget-bin/www_bget?ko:K14548	Ribosome biogenesis in eukaryotes	ko03008	KOG2048(R)(WD40 repeat protein)	gnl|BL_ORD_ID|233028;sp|Q969X6|UTP4_HUMAN	sp|Q969X6|UTP4_HUMAN U3 small nucleolar RNA-associated protein 4 homolog OS=Homo sapiens GN=UTP4 PE=1 SV=1;sp|Q969X6|UTP4_HUMAN U3 small nucleolar RNA-associated protein 4 homolog OS=Homo sapiens GN=UTP4 PE=1 SV=1
FBL	2.16903	2.05446	2.06539	2.57684	2.43452	2.41027	2.21888	2.29449	2.25022	2.24922	2.2522	2.29896	1.97525	1.92038	1.80223	1.89053	1.95918	1.98354	PREDICTED: rRNA 2'-O-methyltransferase fibrillarin [Pelodiscus sinensis]	GO:1990259;GO:0006364;GO:0008033;GO:0015030;GO:0003723;GO:1990258;GO:0008649;GO:0031167;GO:0008168;GO:0032040;GO:0000494;GO:0031428	histone-glutamine methyltransferase activity;rRNA processing;tRNA processing;Cajal body;RNA binding;histone glutamine methylation;rRNA methyltransferase activity;rRNA methylation;methyltransferase activity;small-subunit processome;box C/D snoRNA 3'-end processing;box C/D snoRNP complex	K14563	NOP1,FBL	http://www.genome.jp/dbget-bin/www_bget?ko:K14563	Ribosome biogenesis in eukaryotes	ko03008	KOG1596(A)(Fibrillarin and related nucleolar RNA-binding proteins)	sp|P22232|FBRL_XENLA;gnl|BL_ORD_ID|388089	sp|P22232|FBRL_XENLA rRNA 2'-O-methyltransferase fibrillarin OS=Xenopus laevis GN=fbl PE=2 SV=1;sp|P22232|FBRL_XENLA rRNA 2'-O-methyltransferase fibrillarin OS=Xenopus laevis GN=fbl PE=2 SV=1
NOP10	2.6236	2.57978	2.51036	3.04253	2.91575	3.05174	2.59007	2.72982	2.78563	2.62718	2.75116	2.75676	2.59441	2.46376	2.4899	2.54202	2.55751	2.56467	PREDICTED: H/ACA ribonucleoprotein complex subunit 3 [Pelodiscus sinensis]	GO:0042254;GO:0070034;GO:0090661;GO:0030529;GO:0001522;GO:0031429;GO:0005697;GO:0034513;GO:0030515;GO:0005634;GO:0019013	ribosome biogenesis;telomerase RNA binding;box H/ACA telomerase RNP complex;intracellular ribonucleoprotein complex;pseudouridine synthesis;box H/ACA snoRNP complex;telomerase holoenzyme complex;box H/ACA snoRNA binding;snoRNA binding;nucleus;viral nucleocapsid	K11130	NOP10,NOLA3	http://www.genome.jp/dbget-bin/www_bget?ko:K11130	Ribosome biogenesis in eukaryotes	ko03008	KOG3503(A)(H/ACA snoRNP complex, subunit NOP10)	gnl|BL_ORD_ID|116056	sp|Q6DRH5|NOP10_DANRE H/ACA ribonucleoprotein complex subunit 3 OS=Danio rerio GN=nop10 PE=3 SV=1
LOC102457923	3.33913	2.84923	3.11934	0	0	0	3.38224	3.09555	3.22448	3.17286	3.40991	3.0997	3.03702	2.31161	2.74695	3.1992	2.95472	2.98694	PREDICTED: polyubiquitin-B isoform X1 [Drosophila elegans]<>XP_017064107.1 PREDICTED: polyubiquitin-B [Drosophila eugracilis]	GO:0006296;GO:0005737;GO:0045742;GO:0070062;GO:0005654;GO:0070423;GO:0090263;GO:0019985;GO:0005978;GO:0075733;GO:0016055;GO:0007219;GO:0010008;GO:0000122;GO:0033209;GO:0005886;GO:0000165;GO:0051092;GO:0002223;GO:0060071;GO:0051436;GO:0031145;GO:0006297;GO:0002755;GO:0000086;GO:0034220;GO:0006283;GO:0044267;GO:0000209;GO:0042059;GO:0044822;GO:0070987;GO:0038061;GO:0042787;GO:0007179;GO:0005829;GO:…	nucleotide-excision repair, DNA incision, 5'-to lesion;cytoplasm;positive regulation of epidermal growth factor receptor signaling pathway;extracellular exosome;nucleoplasm;nucleotide-binding oligomerization domain containing signaling pathway;positive regulation of canonical Wnt signaling pathway;translesion synthesis;glycogen biosynthetic process;intracellular transport of virus;Wnt signaling p…	K02977	RP-S27Ae,RPS27A	http://www.genome.jp/dbget-bin/www_bget?ko:K02977	Ribosome	ko03010	KOG0004(J)(Ubiquitin/40S ribosomal protein S27a fusion)	gnl|BL_ORD_ID|235333	sp|P62972|UBIQP_XENLA Polyubiquitin (Fragment) OS=Xenopus laevis PE=1 SV=2
MRPS14	2.13152	2.06685	2.10612	2.22789	2.19098	2.35654	2.0054	1.88502	2.00312	1.99282	2.01258	2.06982	1.9345	1.89371	2.02661	1.86664	2.02938	1.93339	PREDICTED: 28S ribosomal protein S14, mitochondrial, partial [Pelodiscus sinensis];PREDICTED: 28S ribosomal protein S14, mitochondrial [Chelonia mydas]	GO:0003735;GO:0031965;GO:0005622;GO:0005840;GO:0005739;GO:0044822;GO:0005763;GO:0006412;GO:0016787	structural constituent of ribosome;nuclear membrane;intracellular;ribosome;mitochondrion;RNA binding;mitochondrial small ribosomal subunit;translation;hydrolase activity	K02954	RP-S14,MRPS14,rpsN	http://www.genome.jp/dbget-bin/www_bget?ko:K02954	Ribosome	ko03010	KOG1741(J)(Mitochondrial/chloroplast ribosomal protein S14/S29)	sp|Q6B860|RT14_BOVIN;gnl|BL_ORD_ID|482670	sp|Q6B860|RT14_BOVIN 28S ribosomal protein S14, mitochondrial OS=Bos taurus GN=MRPS14 PE=1 SV=1;sp|Q6B860|RT14_BOVIN 28S ribosomal protein S14, mitochondrial OS=Bos taurus GN=MRPS14 PE=1 SV=1
MRPS6	1.73038	1.89371	1.69888	1.66445	1.16791	1.47972	1.55255	1.74202	1.6149	1.69311	1.58467	1.54233	1.88593	1.84997	1.72024	1.74492	1.88536	1.63589	PREDICTED: 28S ribosomal protein S6, mitochondrial [Pelodiscus sinensis]	GO:0003735;GO:0005840;GO:0019843;GO:0006412	structural constituent of ribosome;ribosome;rRNA binding;translation	K02990	RP-S6,MRPS6,rpsF	http://www.genome.jp/dbget-bin/www_bget?ko:K02990	Ribosome	ko03010	-	gnl|BL_ORD_ID|477916;sp|Q5ZIJ2|RT06_CHICK	sp|Q5ZIJ2|RT06_CHICK 28S ribosomal protein S6, mitochondrial OS=Gallus gallus GN=MRPS6 PE=2 SV=3;sp|Q5ZIJ2|RT06_CHICK 28S ribosomal protein S6, mitochondrial OS=Gallus gallus GN=MRPS6 PE=2 SV=3
RPL28	3.38503	3.43159	3.48246	3.63697	3.49795	3.64966	3.26606	3.28627	3.40489	3.23248	3.35316	3.3506	3.36805	3.27339	3.28408	3.304	3.42847	3.42759	PREDICTED: 60S ribosomal protein L28 [Pelodiscus sinensis]	GO:0003735;GO:0005622;GO:0005840;GO:0006412	structural constituent of ribosome;intracellular;ribosome;translation	K02903	RP-L28e,RPL28	http://www.genome.jp/dbget-bin/www_bget?ko:K02903	Ribosome	ko03010	KOG3412(J)(60S ribosomal protein L28)	gnl|BL_ORD_ID|459325;sp|Q3T0L7|RL28_BOVIN	sp|Q3T0L7|RL28_BOVIN 60S ribosomal protein L28 OS=Bos taurus GN=RPL28 PE=2 SV=3;sp|Q3T0L7|RL28_BOVIN 60S ribosomal protein L28 OS=Bos taurus GN=RPL28 PE=2 SV=3
RPL38	3.4447	3.51351	3.55292	3.80472	3.69634	3.8112	3.51437	3.49876	3.58086	3.4565	3.4413	3.45796	3.49289	3.46852	3.57596	3.53107	3.60265	3.56713	60S ribosomal protein L38 [Salmo salar]<>ACN12380.1 60S ribosomal protein L38 [Salmo salar];60S ribosomal protein L38, partial [Oryzias melastigma]	-	-	K02923	RP-L38e,RPL38	http://www.genome.jp/dbget-bin/www_bget?ko:K02923	Ribosome	ko03010	KOG3499(J)(60S ribosomal protein L38)	sp|P63174|RL38_RAT;sp|Q32PB9|RL38_BOVIN;gnl|BL_ORD_ID|171147	sp|P63174|RL38_RAT 60S ribosomal protein L38 OS=Rattus norvegicus GN=Rpl38 PE=1 SV=2;sp|Q32PB9|RL38_BOVIN 60S ribosomal protein L38 OS=Bos taurus GN=RPL38 PE=3 SV=4;sp|Q32PB9|RL38_BOVIN 60S ribosomal protein L38 OS=Bos taurus GN=RPL38 PE=3 SV=4
RPLP0	3.69116	3.6978	3.50508	3.31108	3.13952	3.38587	3.59369	3.6766	3.49999	3.33244	3.33432	3.39093	3.45583	3.5226	3.50169	3.23674	3.28574	3.25338	60S acidic ribosomal protein P0 [Alligator mississippiensis]	GO:0005737;GO:0070062;GO:0005622;GO:0005840;GO:0042254;GO:0030529;GO:0044822;GO:0022625;GO:0016020;GO:0005925;GO:0036464;GO:0005634	cytoplasm;extracellular exosome;intracellular;ribosome;ribosome biogenesis;intracellular ribonucleoprotein complex;RNA binding;cytosolic large ribosomal subunit;membrane;focal adhesion;cytoplasmic ribonucleoprotein granule;nucleus	K02941	RP-LP0,RPLP0	http://www.genome.jp/dbget-bin/www_bget?ko:K02941	Ribosome	ko03010	KOG0815(J)(60S acidic ribosomal protein P0)	sp|P47826|RLA0_CHICK;gnl|BL_ORD_ID|176635	sp|P47826|RLA0_CHICK 60S acidic ribosomal protein P0 OS=Gallus gallus GN=RPLP0 PE=2 SV=1;sp|P47826|RLA0_CHICK 60S acidic ribosomal protein P0 OS=Gallus gallus GN=RPLP0 PE=2 SV=1
RPS28	3.20432	3.30765	3.34065	3.2897	3.19297	3.34572	3.02033	3.095	3.06677	3.04842	3.07871	3.14157	3.03914	2.94252	3.02575	2.91907	3.2385	3.15863	hypothetical protein A6R68_08900, partial [Neotoma lepida];hypothetical protein N301_14584, partial [Charadrius vociferus]	GO:0003735;GO:0070062;GO:0005622;GO:0005840;GO:0042254;GO:0030490;GO:0044822;GO:0003723;GO:0000028;GO:0022627;GO:0006412;GO:0006407	structural constituent of ribosome;extracellular exosome;intracellular;ribosome;ribosome biogenesis;maturation of SSU-rRNA;RNA binding;RNA binding;ribosomal small subunit assembly;cytosolic small ribosomal subunit;translation;rRNA export from nucleus	K02979	RP-S28e,RPS28	http://www.genome.jp/dbget-bin/www_bget?ko:K02979	Ribosome	ko03010	KOG3502(J)(40S ribosomal protein S28)	gnl|BL_ORD_ID|472294;sp|Q6QAT1|RS28_PIG	sp|Q6QAT1|RS28_PIG 40S ribosomal protein S28 OS=Sus scrofa GN=RPS28 PE=1 SV=2;sp|Q6QAT1|RS28_PIG 40S ribosomal protein S28 OS=Sus scrofa GN=RPS28 PE=1 SV=2
UBA52	3.44002	3.46497	3.48786	3.88814	3.81055	3.95606	3.77194	3.83194	3.75181	3.69554	3.69472	3.75297	3.63717	3.75622	3.66948	3.71162	3.72053	3.68664	ubiquitin A-52 residue ribosomal protein fusion product 1, partial [Homo sapiens]	GO:0006296;GO:0045742;GO:0003735;GO:0070062;GO:0005765;GO:0005654;GO:0070423;GO:0006364;GO:0090263;GO:0019985;GO:0005978;GO:0075733;GO:0016055;GO:0007219;GO:0010008;GO:0000122;GO:0033209;GO:0005886;GO:0000165;GO:0051092;GO:0002223;GO:0060071;GO:0051436;GO:0006464;GO:0031145;GO:0006297;GO:0002755;GO:0000086;GO:0034220;GO:0006283;GO:0044267;GO:0000209;GO:0042059;GO:0006614;GO:0070987;GO:0038061;GO:…	nucleotide-excision repair, DNA incision, 5'-to lesion;positive regulation of epidermal growth factor receptor signaling pathway;structural constituent of ribosome;extracellular exosome;lysosomal membrane;nucleoplasm;nucleotide-binding oligomerization domain containing signaling pathway;rRNA processing;positive regulation of canonical Wnt signaling pathway;translesion synthesis;glycogen biosynthe…	K02927	RP-L40e,RPL40	http://www.genome.jp/dbget-bin/www_bget?ko:K02927	Ribosome	ko03010	KOG0004(J)(Ubiquitin/40S ribosomal protein S27a fusion)	sp|P62987|RL40_HUMAN;gnl|BL_ORD_ID|459228	sp|P62987|RL40_HUMAN Ubiquitin-60S ribosomal protein L40 OS=Homo sapiens GN=UBA52 PE=1 SV=2;sp|P0C273|RL40_MACFA Ubiquitin-60S ribosomal protein L40 OS=Macaca fascicularis GN=UBA52 PE=2 SV=2
ALDH1A1	2.25431	2.36496	2.09339	1.80223	2.08189	1.94807	2.37142	2.33092	2.32046	2.41946	2.01237	2.19816	2.2414	2.39242	2.73398	2.35162	2.4974	2.59889	PREDICTED: retinal dehydrogenase 1 [Ochotona princeps];PREDICTED: retinal dehydrogenase 1 isoform X2 [Gavialis gangeticus];PREDICTED: retinal dehydrogenase 1 [Pelodiscus sinensis]	GO:0070062;GO:0008152;GO:0016620;GO:0055114;GO:0016491;GO:0004029	extracellular exosome;metabolic process;oxidoreductase activity, acting on the aldehyde or oxo group of donors, NAD or NADP as acceptor;oxidation-reduction process;oxidoreductase activity;aldehyde dehydrogenase (NAD) activity	K07249	E1.2.1.36	http://www.genome.jp/dbget-bin/www_bget?ko:K07249	Retinol metabolism	ko00830	KOG2450(C)(Aldehyde dehydrogenase)	sp|P27463|AL1A1_CHICK;gnl|BL_ORD_ID|274406	sp|P27463|AL1A1_CHICK Retinal dehydrogenase 1 OS=Gallus gallus GN=ALDH1A1 PE=2 SV=1;sp|P27463|AL1A1_CHICK Retinal dehydrogenase 1 OS=Gallus gallus GN=ALDH1A1 PE=2 SV=1
LOC102453846	1.93917	1.42878	1.83404	1.74327	2.12995	1.7492	2.36361	2.24687	2.14301	2.0133	2.40732	1.95665	2.22642	2.20782	2.41792	2.11687	2.37794	1.97955	PREDICTED: retinol dehydrogenase 16, partial [Pelodiscus sinensis]	-	-	K11154	RDH16	http://www.genome.jp/dbget-bin/www_bget?ko:K11154	Retinol metabolism	ko00830	KOG1205(Q)(Predicted dehydrogenase)	sp|O75452|RDH16_HUMAN;gnl|BL_ORD_ID|160548	sp|O75452|RDH16_HUMAN Retinol dehydrogenase 16 OS=Homo sapiens GN=RDH16 PE=1 SV=2;sp|O75452|RDH16_HUMAN Retinol dehydrogenase 16 OS=Homo sapiens GN=RDH16 PE=1 SV=2
ATP6AP2	1.83181	1.87523	1.78739	1.68233	1.70919	1.73328	2.15625	2.10123	2.04009	2.14195	2.07177	1.98466	1.87841	1.98399	1.91876	1.86558	1.83117	1.96713	PREDICTED: LOW QUALITY PROTEIN: renin receptor [Pelodiscus sinensis];PREDICTED: renin receptor [Chrysemys picta bellii]	-	-	K19514	ATP6AP2,PRR	http://www.genome.jp/dbget-bin/www_bget?ko:K19514	Renin-angiotensin system	ko04614	-	gnl|BL_ORD_ID|156932;sp|O75787|RENR_HUMAN	sp|Q6AXS4|RENR_RAT Renin receptor OS=Rattus norvegicus GN=Atp6ap2 PE=2 SV=1;sp|O75787|RENR_HUMAN Renin receptor OS=Homo sapiens GN=ATP6AP2 PE=1 SV=2
MYL9	1.3955	1.06408	1.18977	1.85902	1.99034	1.80448	1.81697	1.78979	1.74989	1.85848	1.93887	2.06595	1.66361	1.56182	1.61077	1.76178	1.65263	1.66894	myosin regulatory light polypeptide 9 [Alligator mississippiensis]	GO:0005509;GO:0001725;GO:0032036;GO:0016460;GO:0070527;GO:0030018	calcium ion binding;stress fiber;myosin heavy chain binding;myosin II complex;platelet aggregation;Z disc	K12755	MYL9	http://www.genome.jp/dbget-bin/www_bget?ko:K12755	Regulation of actin cytoskeleton;Focal adhesion;Tight junction;cAMP signaling pathway;cGMP - PKG signaling pathway;Vascular smooth muscle contraction;Oxytocin signaling pathway;Leukocyte transendothelial migration	ko04810,ko04510,ko04530,ko04024,ko04022,ko04270,ko04921,ko04670	KOG0031(Z)(Myosin regulatory light chain, EF-Hand protein superfamily)	sp|P02612|MLRM_CHICK;gnl|BL_ORD_ID|107047;sp|P29269|MYL9_PIG	sp|P02612|MLRM_CHICK Myosin regulatory light chain 2, smooth muscle major isoform OS=Gallus gallus PE=1 SV=2;sp|P29269|MYL9_PIG Myosin regulatory light polypeptide 9 OS=Sus scrofa GN=MYL9 PE=1 SV=2;sp|P29269|MYL9_PIG Myosin regulatory light polypeptide 9 OS=Sus scrofa GN=MYL9 PE=1 SV=2
LOC102443736	1.54008	1.34005	1.55242	1.84404	1.8721	1.87128	1.63094	1.65485	1.67587	1.60097	1.65916	1.56714	1.95139	1.97021	1.70027	1.83372	1.91714	1.9431	PREDICTED: uncharacterized protein LOC102443736 [Pelodiscus sinensis]	-	-	K06482	ITGA3	http://www.genome.jp/dbget-bin/www_bget?ko:K06482	Regulation of actin cytoskeleton;Focal adhesion;PI3K-Akt signaling pathway;ECM-receptor interaction;Hematopoietic cell lineage	ko04810,ko04510,ko04151,ko04512,ko04640	-	gnl|BL_ORD_ID|60201	sp|P26006|ITA3_HUMAN Integrin alpha-3 OS=Homo sapiens GN=ITGA3 PE=1 SV=5
ITGA5	1.45056	1.37493	1.42765	1.74005	1.67237	1.84198	1.66474	1.66342	1.69618	1.66857	1.7673	1.72941	1.76215	1.61553	1.64058	1.70961	1.54617	1.67025	PREDICTED: integrin alpha-5 [Pelodiscus sinensis]	GO:0009897;GO:0007157;GO:0007155;GO:0005886;GO:0033631;GO:0050731;GO:0005911;GO:0016021;GO:0045202;GO:0016020;GO:0032587;GO:0005178;GO:0034113;GO:0005925;GO:0007044;GO:0007229;GO:2000811;GO:0007613;GO:0005783;GO:0035987;GO:0009986	external side of plasma membrane;heterophilic cell-cell adhesion via plasma membrane cell adhesion molecules;cell adhesion;plasma membrane;cell-cell adhesion mediated by integrin;positive regulation of peptidyl-tyrosine phosphorylation;cell-cell junction;integral component of membrane;synapse;membrane;ruffle membrane;integrin binding;heterotypic cell-cell adhesion;focal adhesion;cell-substrate ju…	K06484	ITGA5	http://www.genome.jp/dbget-bin/www_bget?ko:K06484	Regulation of actin cytoskeleton;Focal adhesion;Phagosome;PI3K-Akt signaling pathway;ECM-receptor interaction;Hematopoietic cell lineage	ko04810,ko04510,ko04145,ko04151,ko04512,ko04640	KOG3637(W)(Vitronectin receptor, alpha subunit)	sp|P11688|ITA5_MOUSE;gnl|BL_ORD_ID|64901;sp|Q06274|ITA5_XENLA	sp|P11688|ITA5_MOUSE Integrin alpha-5 OS=Mus musculus GN=Itga5 PE=1 SV=3;sp|P11688|ITA5_MOUSE Integrin alpha-5 OS=Mus musculus GN=Itga5 PE=1 SV=3;sp|Q06274|ITA5_XENLA Integrin alpha-5 OS=Xenopus laevis GN=itga5 PE=2 SV=1
LOC102449158	1.60938	1.58861	1.66913	1.89498	1.77721	1.77873	1.52905	1.42177	1.6066	1.42586	1.58715	1.48686	1.59506	1.45758	1.48558	1.576	1.59129	1.53377	Serine/threonine-protein phosphatase 4 catalytic subunit B [Chelonia mydas];PREDICTED: adapter molecule crk-like [Pelodiscus sinensis];PREDICTED: crk-like protein [Chrysemys picta bellii]	GO:0005737;GO:0005886;GO:0032956;GO:0016020;GO:0043087;GO:0048013	cytoplasm;plasma membrane;regulation of actin cytoskeleton organization;membrane;regulation of GTPase activity;ephrin receptor signaling pathway	K04438	CRK,CRKII	http://www.genome.jp/dbget-bin/www_bget?ko:K04438	Regulation of actin cytoskeleton;Focal adhesion;ErbB signaling pathway;MAPK signaling pathway;Rap1 signaling pathway;Insulin signaling pathway;Chemokine signaling pathway;Fc gamma R-mediated phagocytosis;Neurotrophin signaling pathway	ko04810,ko04510,ko04012,ko04010,ko04015,ko04910,ko04062,ko04666,ko04722	KOG0197(T)(Tyrosine kinases);KOG2070(F)(Guanine nucleotide exchange factor);KOG4792(T)(Crk family adapters);KOG3601(T)(Adaptor protein GRB2, contains SH2 and SH3 domains)	sp|Q5U2U2|CRKL_RAT;gnl|BL_ORD_ID|319084;sp|P87378|CRK_XENLA;sp|P47941|CRKL_MOUSE;sp|P46109|CRKL_HUMAN	sp|Q5U2U2|CRKL_RAT Crk-like protein OS=Rattus norvegicus GN=Crkl PE=1 SV=1;sp|Q5U2U2|CRKL_RAT Crk-like protein OS=Rattus norvegicus GN=Crkl PE=1 SV=1;sp|P87378|CRK_XENLA Adapter molecule crk OS=Xenopus laevis GN=crk PE=2 SV=1;sp|P47941|CRKL_MOUSE Crk-like protein OS=Mus musculus GN=Crkl PE=1 SV=2;sp|P46109|CRKL_HUMAN Crk-like protein OS=Homo sapiens GN=CRKL PE=1 SV=1
LOC106732115	1.71223	1.60314	1.82171	2.23307	2.27411	2.23032	1.85034	1.85022	2.06974	1.85339	2.07441	1.98869	2.12503	1.97234	2.04817	2.19565	2.08998	2.16023	PREDICTED: serine/threonine-protein kinase A-Raf-like [Pelodiscus sinensis]	GO:0005739	mitochondrion	K08845	ARAF,ARAF1	http://www.genome.jp/dbget-bin/www_bget?ko:K08845	Regulation of actin cytoskeleton;ErbB signaling pathway;FoxO signaling pathway;Vascular smooth muscle contraction;Insulin signaling pathway;Progesterone-mediated oocyte maturation;Natural killer cell mediated cytotoxicity;Long-term depression;Long-term potentiation;Serotonergic synapse	ko04810,ko04012,ko04068,ko04270,ko04910,ko04914,ko04650,ko04730,ko04720,ko04726	KOG0193(T)(Serine/threonine protein kinase RAF)	gnl|BL_ORD_ID|278993	sp|P10398|ARAF_HUMAN Serine/threonine-protein kinase A-Raf OS=Homo sapiens GN=ARAF PE=1 SV=2
ARPC3	2.31498	2.30681	2.05843	2.02987	1.76842	1.98659	2.27305	2.31652	2.10428	2.0016	1.91803	1.98281	2.22152	2.26947	2.19921	1.97206	1.93364	1.88598	PREDICTED: actin-related protein 2/3 complex subunit 3 [Pelodiscus sinensis]	GO:0051015;GO:0005737;GO:0070062;GO:0030027;GO:0005856;GO:0016020;GO:0030833;GO:0034314;GO:0005885;GO:0005925;GO:0003779;GO:0005200	actin filament binding;cytoplasm;extracellular exosome;lamellipodium;cytoskeleton;membrane;regulation of actin filament polymerization;Arp2/3 complex-mediated actin nucleation;Arp2/3 protein complex;focal adhesion;actin binding;structural constituent of cytoskeleton	K05756	ARPC3	http://www.genome.jp/dbget-bin/www_bget?ko:K05756	Regulation of actin cytoskeleton;Endocytosis;Fc gamma R-mediated phagocytosis	ko04810,ko04144,ko04666	KOG3155(Z)(Actin-related protein Arp2/3 complex, subunit ARPC3)	gnl|BL_ORD_ID|286476	sp|O15145|ARPC3_HUMAN Actin-related protein 2/3 complex subunit 3 OS=Homo sapiens GN=ARPC3 PE=1 SV=3
ARPC4	2.33736	2.20107	2.32445	2.48012	2.4179	2.48618	2.32545	2.41061	2.37903	2.35021	2.26703	2.28147	2.42579	2.52412	2.46944	2.32296	2.35336	2.49618	PREDICTED: actin-related protein 2/3 complex subunit 4 [Pelodiscus sinensis];PREDICTED: actin-related protein 2/3 complex subunit 4 [Sorex araneus]	-	-	K05755	ARPC4	http://www.genome.jp/dbget-bin/www_bget?ko:K05755	Regulation of actin cytoskeleton;Endocytosis;Fc gamma R-mediated phagocytosis	ko04810,ko04144,ko04666	KOG1876(Z)(Actin-related protein Arp2/3 complex, subunit ARPC4)	sp|P59999|ARPC4_MOUSE;gnl|BL_ORD_ID|286477	sp|P59999|ARPC4_MOUSE Actin-related protein 2/3 complex subunit 4 OS=Mus musculus GN=Arpc4 PE=1 SV=3;sp|P59999|ARPC4_MOUSE Actin-related protein 2/3 complex subunit 4 OS=Mus musculus GN=Arpc4 PE=1 SV=3
CFL1	2.11869	1.89282	1.96166	2.19128	2.21819	2.11618	2.17289	2.22505	2.18067	2.14965	2.12005	2.18503	1.64914	1.61584	1.58614	1.62511	1.76938	1.63988	PREDICTED: cofilin-1 [Pelodiscus sinensis]	GO:0051015;GO:0005737;GO:0070062;GO:0005622;GO:0042995;GO:0044794;GO:0005886;GO:0031012;GO:0005856;GO:0007010;GO:0016363;GO:0016020;GO:0032587;GO:0005925;GO:0030042;GO:0003779;GO:0009615;GO:0005615;GO:0061001;GO:0031982;GO:0015629;GO:0005634;GO:0031258;GO:0022604	actin filament binding;cytoplasm;extracellular exosome;intracellular;cell projection;positive regulation by host of viral process;plasma membrane;extracellular matrix;cytoskeleton;cytoskeleton organization;nuclear matrix;membrane;ruffle membrane;focal adhesion;actin filament depolymerization;actin binding;response to virus;extracellular space;regulation of dendritic spine morphogenesis;vesicle;ac…	K05765	CFL	http://www.genome.jp/dbget-bin/www_bget?ko:K05765	Regulation of actin cytoskeleton;Axon guidance;Fc gamma R-mediated phagocytosis	ko04810,ko04360,ko04666	KOG1735(Z)(Actin depolymerizing factor)	sp|Q6B7M7|COF1_SHEEP;sp|P10668|COF1_PIG;sp|Q4R5C0|COF1_MACFA;gnl|BL_ORD_ID|315304	sp|Q6B7M7|COF1_SHEEP Cofilin-1 OS=Ovis aries GN=CFL1 PE=2 SV=3;sp|P10668|COF1_PIG Cofilin-1 OS=Sus scrofa GN=CFL1 PE=1 SV=3;sp|Q4R5C0|COF1_MACFA Cofilin-1 OS=Macaca fascicularis GN=CFL1 PE=2 SV=3;sp|P10668|COF1_PIG Cofilin-1 OS=Sus scrofa GN=CFL1 PE=1 SV=3
SSH3	1.14953	1.11428	1.21827	1.69099	1.69653	1.79803	1.4833	1.46835	1.55606	1.52257	1.5407	1.52127	1.73815	1.8171	1.7195	1.71155	1.58569	1.82827	PREDICTED: protein phosphatase Slingshot homolog 3 [Pelodiscus sinensis]	GO:0016791;GO:0003677;GO:0004725;GO:0016787;GO:0005856;GO:0008138;GO:0006470;GO:0016311	phosphatase activity;DNA binding;protein tyrosine phosphatase activity;hydrolase activity;cytoskeleton;protein tyrosine/serine/threonine phosphatase activity;protein dephosphorylation;dephosphorylation	K05766	SSH	http://www.genome.jp/dbget-bin/www_bget?ko:K05766	Regulation of actin cytoskeleton;Axon guidance	ko04810,ko04360	KOG1717(V)(Dual specificity phosphatase)	sp|Q76I79|SSH1_MOUSE;sp|Q5XIS1|SSH3_RAT;sp|Q8TE77|SSH3_HUMAN;gnl|BL_ORD_ID|206247	sp|Q76I79|SSH1_MOUSE Protein phosphatase Slingshot homolog 1 OS=Mus musculus GN=Ssh1 PE=1 SV=1;sp|Q5XIS1|SSH3_RAT Protein phosphatase Slingshot homolog 3 OS=Rattus norvegicus GN=Ssh3 PE=1 SV=1;sp|Q8TE77|SSH3_HUMAN Protein phosphatase Slingshot homolog 3 OS=Homo sapiens GN=SSH3 PE=1 SV=2;sp|Q5XIS1|SSH3_RAT Protein phosphatase Slingshot homolog 3 OS=Rattus norvegicus GN=Ssh3 PE=1 SV=1
LOC106731841	1.66001	1.61342	1.71508	1.59605	1.73664	1.5605	1.74036	1.63599	1.65466	1.68431	1.59017	1.617	1.98511	2.09757	2.01393	1.91834	1.84504	1.86817	PREDICTED: ras-related protein R-Ras-like isoform X1 [Pelodiscus sinensis]<>XP_014427882.1 PREDICTED: ras-related protein R-Ras-like isoform X2 [Pelodiscus sinensis]	-	-	K07830	RRAS2,TC21	http://www.genome.jp/dbget-bin/www_bget?ko:K07830	Regulation of actin cytoskeleton;Autophagy - animal;Mitophagy - animal;Apelin signaling pathway;MAPK signaling pathway;Phospholipase D signaling pathway;Ras signaling pathway;cAMP signaling pathway	ko04810,ko04140,ko04137,ko04371,ko04010,ko04072,ko04014,ko04024	KOG0395(R)(Ras-related GTPase)	gnl|BL_ORD_ID|182686	sp|P10301|RRAS_HUMAN Ras-related protein R-Ras OS=Homo sapiens GN=RRAS PE=1 SV=1
FGFR1	1.83467	1.78483	1.89708	2.21556	2.12639	2.11588	1.88964	1.856	1.97695	1.95598	1.99642	1.91766	2.03113	2.07558	1.93278	2.05373	1.94949	2.01787	PREDICTED: LOW QUALITY PROTEIN: fibroblast growth factor receptor 1 [Pelodiscus sinensis]	-	-	K04362	FGFR1	http://www.genome.jp/dbget-bin/www_bget?ko:K04362	Regulation of actin cytoskeleton;Adherens junction;Signaling pathways regulating pluripotency of stem cells;MAPK signaling pathway;PI3K-Akt signaling pathway;Rap1 signaling pathway;Ras signaling pathway	ko04810,ko04520,ko04550,ko04010,ko04151,ko04015,ko04014	KOG0200(T)(Fibroblast/platelet-derived growth factor receptor and related receptor tyrosine kinases)	sp|P11362|FGFR1_HUMAN;gnl|BL_ORD_ID|387116;sp|P21804|FGFR1_CHICK	sp|P11362|FGFR1_HUMAN Fibroblast growth factor receptor 1 OS=Homo sapiens GN=FGFR1 PE=1 SV=3;sp|P21804|FGFR1_CHICK Fibroblast growth factor receptor 1 OS=Gallus gallus GN=FGFR1 PE=2 SV=1;sp|P21804|FGFR1_CHICK Fibroblast growth factor receptor 1 OS=Gallus gallus GN=FGFR1 PE=2 SV=1
RAC3	1.14364	1.2783	1.3518	1.63134	1.78226	1.78986	1.5978	1.55594	1.68404	1.65944	1.56372	1.63276	1.90768	1.91971	1.9825	1.88116	1.95813	1.88655	PREDICTED: ras-related C3 botulinum toxin substrate 3 [Pelodiscus sinensis];ras-related C3 botulinum toxin substrate 3 [Amazona aestiva];PREDICTED: ras-related C3 botulinum toxin substrate 3 [Calidris pugnax]<>XP_014807909.1 PREDICTED: ras-related C3 botulinum toxin substrate 3 [Calidris pugnax]	GO:0048812;GO:0007264;GO:0031532;GO:0005515;GO:0005525	neuron projection morphogenesis;small GTPase mediated signal transduction;actin cytoskeleton reorganization;protein binding;GTP binding	K07861	RAC3	http://www.genome.jp/dbget-bin/www_bget?ko:K07861	Regulation of actin cytoskeleton;Adherens junction;Focal adhesion;MAPK signaling pathway;Rap1 signaling pathway;Ras signaling pathway;Sphingolipid signaling pathway;VEGF signaling pathway;Wnt signaling pathway;cAMP signaling pathway;Axon guidance;B cell receptor signaling pathway;Fc epsilon RI signaling pathway;Natural killer cell mediated cytotoxicity	ko04810,ko04520,ko04510,ko04010,ko04015,ko04014,ko04071,ko04370,ko04310,ko04024,ko04360,ko04662,ko04664,ko04650	KOG0393(R)(Ras-related small GTPase, Rho type)	gnl|BL_ORD_ID|153725;sp|P60763|RAC3_HUMAN	sp|P60764|RAC3_MOUSE Ras-related C3 botulinum toxin substrate 3 OS=Mus musculus GN=Rac3 PE=1 SV=1;sp|P60763|RAC3_HUMAN Ras-related C3 botulinum toxin substrate 3 OS=Homo sapiens GN=RAC3 PE=1 SV=1
HAGH	1.88621	1.79021	1.81783	1.69496	1.97763	1.78362	2.33977	2.21189	2.13735	2.24912	2.19237	2.1712	2.04677	2.29345	2.26383	2.05096	2.0975	2.21846	PREDICTED: hydroxyacylglutathione hydrolase, mitochondrial isoform X2 [Chrysemys picta bellii];PREDICTED: hydroxyacylglutathione hydrolase, mitochondrial isoform X1 [Chrysemys picta bellii]<>XP_008162992.1 PREDICTED: hydroxyacylglutathione hydrolase, mitochondrial isoform X1 [Chrysemys picta bellii];PREDICTED: hydroxyacylglutathione hydrolase, mitochondrial isoform X3 [Chrysemys picta bellii]	GO:0005759;GO:0004416;GO:0019853;GO:0019243;GO:0046872	mitochondrial matrix;hydroxyacylglutathione hydrolase activity;L-ascorbic acid biosynthetic process;methylglyoxal catabolic process to D-lactate via S-lactoyl-glutathione;metal ion binding	K01069	E3.1.2.6,gloB	http://www.genome.jp/dbget-bin/www_bget?ko:K01069	Pyruvate metabolism	ko00620	KOG0813(R)(Glyoxylase)	sp|Q5ZI23|GLO2_CHICK;gnl|BL_ORD_ID|19774	sp|Q5ZI23|GLO2_CHICK Hydroxyacylglutathione hydrolase, mitochondrial OS=Gallus gallus GN=HAGH PE=2 SV=1;sp|Q5ZI23|GLO2_CHICK Hydroxyacylglutathione hydrolase, mitochondrial OS=Gallus gallus GN=HAGH PE=2 SV=1
LOC102461179	1.71139	1.77808	1.80284	2.10544	1.95386	2.041	1.68368	1.59218	1.6878	1.58737	1.65677	1.63317	1.67688	1.55895	1.55859	1.64473	1.64048	1.74539	PREDICTED: LOW QUALITY PROTEIN: uridine-cytidine kinase-like 1, partial [Pelodiscus sinensis]	GO:0008152;GO:0005524;GO:0016310;GO:0016301;GO:0016740;GO:0044206;GO:0004849;GO:0000166;GO:0044211	metabolic process;ATP binding;phosphorylation;kinase activity;transferase activity;UMP salvage;uridine kinase activity;nucleotide binding;CTP salvage	K00876	udk,UCK	http://www.genome.jp/dbget-bin/www_bget?ko:K00876	Pyrimidine metabolism;Drug metabolism - other enzymes	ko00240,ko00983	KOG4203(TZ)(Armadillo/beta-Catenin/plakoglobin)	sp|Q9NWZ5|UCKL1_HUMAN;gnl|BL_ORD_ID|239097	sp|Q9NWZ5|UCKL1_HUMAN Uridine-cytidine kinase-like 1 OS=Homo sapiens GN=UCKL1 PE=1 SV=2;sp|Q9NWZ5|UCKL1_HUMAN Uridine-cytidine kinase-like 1 OS=Homo sapiens GN=UCKL1 PE=1 SV=2
TK1	1.60606	1.65849	1.63478	2.00333	1.85757	1.86999	1.59295	1.64028	1.7653	1.69627	1.64177	1.73062	1.45362	1.48572	1.37199	1.31618	1.51268	1.45939	PREDICTED: thymidine kinase, cytosolic [Pelodiscus sinensis];PREDICTED: thymidine kinase, cytosolic [Chrysemys picta bellii];PREDICTED: thymidine kinase, cytosolic [Chelonia mydas]	GO:0009157;GO:0042802;GO:0005524;GO:0000166;GO:0046104;GO:0016310;GO:0009165;GO:0006259;GO:0051289;GO:0016301;GO:0071897;GO:0016740;GO:0019206;GO:0008270;GO:0004797	deoxyribonucleoside monophosphate biosynthetic process;identical protein binding;ATP binding;nucleotide binding;thymidine metabolic process;phosphorylation;nucleotide biosynthetic process;DNA metabolic process;protein homotetramerization;kinase activity;DNA biosynthetic process;transferase activity;nucleoside kinase activity;zinc ion binding;thymidine kinase activity	K00857	tdk,TK	http://www.genome.jp/dbget-bin/www_bget?ko:K00857	Pyrimidine metabolism;Drug metabolism - other enzymes	ko00240,ko00983	-	sp|P04047|KITH_CHICK;gnl|BL_ORD_ID|54980	sp|P04047|KITH_CHICK Thymidine kinase, cytosolic OS=Gallus gallus GN=TK1 PE=1 SV=1;sp|P04047|KITH_CHICK Thymidine kinase, cytosolic OS=Gallus gallus GN=TK1 PE=1 SV=1
CANT1	1.29469	1.14706	1.15957	1.65744	1.72411	1.65128	1.6468	1.54765	1.61162	1.56656	1.5966	1.61374	1.68637	1.7522	1.72746	1.83512	1.7129	1.7129	PREDICTED: LOW QUALITY PROTEIN: soluble calcium-activated nucleotidase 1, partial [Pelodiscus sinensis]	GO:0005509;GO:0016462	calcium ion binding;pyrophosphatase activity	K12304	CANT1	http://www.genome.jp/dbget-bin/www_bget?ko:K12304	Purine metabolism;Pyrimidine metabolism	ko00230,ko00240	-	sp|Q8VCF1|CANT1_MOUSE;gnl|BL_ORD_ID|322300	sp|Q8VCF1|CANT1_MOUSE Soluble calcium-activated nucleotidase 1 OS=Mus musculus GN=Cant1 PE=2 SV=1;sp|Q8WVQ1|CANT1_HUMAN Soluble calcium-activated nucleotidase 1 OS=Homo sapiens GN=CANT1 PE=1 SV=1
HPRT1	1.6886	1.92881	1.73711	1.58013	1.64473	1.74092	1.88812	1.91466	1.85345	1.92122	1.82885	1.79372	1.89415	1.98798	1.99813	1.88762	2.00945	1.86641	PREDICTED: hypoxanthine-guanine phosphoribosyltransferase [Ailuropoda melanoleuca]<>XP_008696993.1 PREDICTED: hypoxanthine-guanine phosphoribosyltransferase [Ursus maritimus]<>XP_019652042.1 PREDICTED: hypoxanthine-guanine phosphoribosyltransferase [Ailuropoda melanoleuca];PREDICTED: hypoxanthine-guanine phosphoribosyltransferase [Pelodiscus sinensis]	-	-	K00760	hprT,hpt,HPRT1	http://www.genome.jp/dbget-bin/www_bget?ko:K00760	Purine metabolism;Drug metabolism - other enzymes	ko00230,ko00983	-	sp|Q9W719|HPRT_CHICK;gnl|BL_ORD_ID|397839	sp|Q9W719|HPRT_CHICK Hypoxanthine-guanine phosphoribosyltransferase OS=Gallus gallus GN=HPRT1 PE=2 SV=1;sp|Q9W719|HPRT_CHICK Hypoxanthine-guanine phosphoribosyltransferase OS=Gallus gallus GN=HPRT1 PE=2 SV=1
IMPDH2	2.16747	1.99651	2.12782	2.4247	2.30963	2.34815	1.94101	2.00612	2.11361	1.99357	2.10397	2.10363	1.90747	1.95328	2.04914	2.01077	2.00736	2.01749	PREDICTED: inosine-5'-monophosphate dehydrogenase 2 [Pelodiscus sinensis]	-	-	K00088	guaB	http://www.genome.jp/dbget-bin/www_bget?ko:K00088	Purine metabolism;Drug metabolism - other enzymes	ko00230,ko00983	KOG2550(F)(IMP dehydrogenase/GMP reductase)	gnl|BL_ORD_ID|48582	sp|E9PU28|IMDH2_RAT Inosine-5'-monophosphate dehydrogenase 2 OS=Rattus norvegicus GN=Impdh2 PE=1 SV=1
ERO1A	1.31302	1.52323	1.55133	1.36361	1.23679	1.40773	1.15442	1.45834	1.37949	1.54741	1.17348	1.39252	1.72754	1.56549	1.31576	1.75059	1.65772	1.69522	PREDICTED: ERO1-like protein alpha [Pelodiscus sinensis]	-	-	K10950	ERO1L	http://www.genome.jp/dbget-bin/www_bget?ko:K10950	Protein processing in endoplasmic reticulum	ko04141	KOG2608(OU)(Endoplasmic reticulum membrane-associated oxidoreductin involved in disulfide bond formation)	sp|A5PJN2|ERO1A_BOVIN;gnl|BL_ORD_ID|390762	sp|A5PJN2|ERO1A_BOVIN ERO1-like protein alpha OS=Bos taurus GN=ERO1A PE=2 SV=1;sp|A5PJN2|ERO1A_BOVIN ERO1-like protein alpha OS=Bos taurus GN=ERO1A PE=2 SV=1
PRKCSH	1.62941	1.42472	1.54925	2.08001	2.28224	2.11571	2.08565	2.07496	2.10023	1.92454	2.12535	2.11314	1.92957	2.10971	2.18853	1.9103	1.87622	2.11531	PREDICTED: glucosidase 2 subunit beta [Pelodiscus sinensis]	-	-	K08288	PRKCSH	http://www.genome.jp/dbget-bin/www_bget?ko:K08288	Protein processing in endoplasmic reticulum	ko04141	KOG2397(T)(Protein kinase C substrate, 80 KD protein, heavy chain)	sp|P14314|GLU2B_HUMAN;sp|O08795|GLU2B_MOUSE;gnl|BL_ORD_ID|16787	sp|P14314|GLU2B_HUMAN Glucosidase 2 subunit beta OS=Homo sapiens GN=PRKCSH PE=1 SV=2;sp|O08795|GLU2B_MOUSE Glucosidase 2 subunit beta OS=Mus musculus GN=Prkcsh PE=1 SV=1;sp|P14314|GLU2B_HUMAN Glucosidase 2 subunit beta OS=Homo sapiens GN=PRKCSH PE=1 SV=2
XBP1	2.04848	2.03181	1.87628	1.81077	1.73933	1.90347	2.12313	2.07096	1.99922	1.84354	1.8053	1.83467	2.44784	2.35732	2.39125	2.05392	1.93987	2.17794	PREDICTED: LOW QUALITY PROTEIN: X-box-binding protein 1 [Chrysemys picta bellii];PREDICTED: uncharacterized protein LOC102939054 [Chelonia mydas];PREDICTED: X-box-binding protein 1 [Pelodiscus sinensis]	-	-	K09027	XBP1	http://www.genome.jp/dbget-bin/www_bget?ko:K09027	Protein processing in endoplasmic reticulum	ko04141	-	sp|Q3SZZ2|XBP1_BOVIN;gnl|BL_ORD_ID|257030;sp|P17861|XBP1_HUMAN	sp|Q3SZZ2|XBP1_BOVIN X-box-binding protein 1 OS=Bos taurus GN=XBP1 PE=2 SV=1;sp|P17861|XBP1_HUMAN X-box-binding protein 1 OS=Homo sapiens GN=XBP1 PE=1 SV=2;sp|P17861|XBP1_HUMAN X-box-binding protein 1 OS=Homo sapiens GN=XBP1 PE=1 SV=2
SPCS1	2.1891	2.2819	2.30856	2.35064	2.13532	2.27168	1.98963	1.95279	2.07896	2.04084	2.10619	2.1013	2.11704	1.89823	1.8707	1.91259	2.13248	1.99564	PREDICTED: signal peptidase complex subunit 1 [Pelodiscus sinensis]	-	-	K12946	SPCS1	http://www.genome.jp/dbget-bin/www_bget?ko:K12946	Protein export	ko03060	KOG4112(U)(Signal peptidase subunit)	sp|B0FWK4|SPCS1_PIG;gnl|BL_ORD_ID|204838	sp|B0FWK4|SPCS1_PIG Signal peptidase complex subunit 1 OS=Sus scrofa GN=SPCS1 PE=3 SV=1;sp|B0FWK4|SPCS1_PIG Signal peptidase complex subunit 1 OS=Sus scrofa GN=SPCS1 PE=3 SV=1
PRCP	1.81538	1.53403	1.76753	1.43823	1.64621	1.50569	2.05111	1.79197	2.04151	1.93018	1.88502	1.75213	1.72965	2.10877	2.16808	1.68422	1.73151	2.02906	PREDICTED: lysosomal Pro-X carboxypeptidase [Pelodiscus sinensis]<>XP_014433600.1 PREDICTED: lysosomal Pro-X carboxypeptidase [Pelodiscus sinensis]	GO:0060055;GO:0042593;GO:0070062;GO:0003085;GO:0002353;GO:0097009;GO:0008236;GO:0043535;GO:0045178;GO:0004185;GO:2000377;GO:0002155;GO:0008239;GO:0006508	angiogenesis involved in wound healing;glucose homeostasis;extracellular exosome;negative regulation of systemic arterial blood pressure;plasma kallikrein-kinin cascade;energy homeostasis;serine-type peptidase activity;regulation of blood vessel endothelial cell migration;basal part of cell;serine-type carboxypeptidase activity;regulation of reactive oxygen species metabolic process;regulation of…	K01285	PRCP	http://www.genome.jp/dbget-bin/www_bget?ko:K01285	Protein digestion and absorption;Renin-angiotensin system	ko04974,ko04614	KOG2183(OR)(Prolylcarboxypeptidase (angiotensinase C))	sp|Q5RBU7|PCP_PONAB;gnl|BL_ORD_ID|119090;sp|P42785|PCP_HUMAN	sp|Q5RBU7|PCP_PONAB Lysosomal Pro-X carboxypeptidase OS=Pongo abelii GN=PRCP PE=2 SV=1;sp|P42785|PCP_HUMAN Lysosomal Pro-X carboxypeptidase OS=Homo sapiens GN=PRCP PE=1 SV=1;sp|P42785|PCP_HUMAN Lysosomal Pro-X carboxypeptidase OS=Homo sapiens GN=PRCP PE=1 SV=1
LOC102451054	1.57898	1.5858	1.57148	2.13837	2.10924	2.10192	1.53895	1.52075	1.5753	1.48373	1.61215	1.56914	1.66068	1.63012	1.71892	1.7854	1.65763	1.82164	PREDICTED: collagen alpha-1(I) chain-like [Pelodiscus sinensis]	-	-	K19720	COL3A	http://www.genome.jp/dbget-bin/www_bget?ko:K19720	Protein digestion and absorption;Platelet activation	ko04974,ko04611	-	-	-
SLC38A2	1.17202	1.436	1.33846	1.15473	1.19117	1.04179	1.7391	1.53706	1.6744	1.75603	1.83123	1.52492	1.91392	2.16155	2.06375	1.93313	1.92834	1.91582	PREDICTED: sodium-coupled neutral amino acid transporter 2 isoform X2 [Pelodiscus sinensis]<>XP_006126541.1 PREDICTED: sodium-coupled neutral amino acid transporter 2 isoform X2 [Pelodiscus sinensis]<>XP_006126542.1 PREDICTED: sodium-coupled neutral amino acid transporter 2 isoform X2 [Pelodiscus sinensis]<>XP_006126543.1 PREDICTED: sodium-coupled neutral amino acid transporter 2 isoform X2 [Pelo…	GO:0005886;GO:0006865;GO:0016021;GO:0016020;GO:0005887;GO:0015171;GO:0003333	plasma membrane;amino acid transport;integral component of membrane;membrane;integral component of plasma membrane;amino acid transmembrane transporter activity;amino acid transmembrane transport	K14207	SLC38A2,SNAT2	http://www.genome.jp/dbget-bin/www_bget?ko:K14207	Protein digestion and absorption;GABAergic synapse;Glutamatergic synapse	ko04974,ko04727,ko04724	KOG1305(E)(Amino acid transporter protein)	sp|Q5F468|S38A2_CHICK;gnl|BL_ORD_ID|484556	sp|Q5F468|S38A2_CHICK Sodium-coupled neutral amino acid transporter 2 OS=Gallus gallus GN=SLC38A2 PE=2 SV=2;sp|Q5F468|S38A2_CHICK Sodium-coupled neutral amino acid transporter 2 OS=Gallus gallus GN=SLC38A2 PE=2 SV=2
LOC102463001	1.98173	1.95727	2.10548	2.34072	2.35934	2.45234	1.80895	1.91455	2.07998	1.92361	1.95933	1.89025	2.29199	2.27381	2.3006	2.37359	2.13767	2.22024	PREDICTED: collagen alpha-1(XVIII) chain-like [Pelodiscus sinensis]	GO:0007155;GO:0031012;GO:0005581;GO:0005198;GO:0005578	cell adhesion;extracellular matrix;collagen trimer;structural molecule activity;proteinaceous extracellular matrix	K06823	COL18A	http://www.genome.jp/dbget-bin/www_bget?ko:K06823	Protein digestion and absorption	ko04974	KOG3546(W)(Collagens (type XV))	gnl|BL_ORD_ID|316730;sp|P39060|COIA1_HUMAN	sp|P39060|COIA1_HUMAN Collagen alpha-1(XVIII) chain OS=Homo sapiens GN=COL18A1 PE=1 SV=5;sp|P39060|COIA1_HUMAN Collagen alpha-1(XVIII) chain OS=Homo sapiens GN=COL18A1 PE=1 SV=5
SHFM1	1.93561	2.26117	2.2766	2.25515	2.00962	2.15679	1.9566	2.07044	1.93018	1.85932	1.92418	1.82872	1.73135	1.54033	1.32613	1.8586	2.08081	1.97809	26S proteasome complex subunit DSS1 [Chelonia mydas];PREDICTED: 26S proteasome complex subunit DSS1 [Pelodiscus sinensis]	GO:0000502;GO:0043248;GO:0032039;GO:0005515;GO:0006508;GO:0000724;GO:0006406;GO:0008541;GO:0005634	proteasome complex;proteasome assembly;integrator complex;protein binding;proteolysis;double-strand break repair via homologous recombination;mRNA export from nucleus;proteasome regulatory particle, lid subcomplex;nucleus	K10881	SHFM1,DSS1	http://www.genome.jp/dbget-bin/www_bget?ko:K10881	Proteasome;Homologous recombination	ko03050,ko03440	-	sp|Q3ZBR6|SEM1_BOVIN;gnl|BL_ORD_ID|199609	sp|Q3ZBR6|SEM1_BOVIN 26S proteasome complex subunit SEM1 OS=Bos taurus GN=SEM1 PE=3 SV=1;sp|Q3ZBR6|SEM1_BOVIN 26S proteasome complex subunit SEM1 OS=Bos taurus GN=SEM1 PE=3 SV=1
LOC102456179	3.15528	3.11177	2.82097	2.73052	2.72382	2.54466	3.45807	3.42101	3.23149	3.30799	3.40782	3.37398	3.22501	3.31464	3.47776	3.01167	3.23675	2.97822	uncharacterized protein Dyak_GE18016, isoform C [Drosophila yakuba]<>KRK01101.1 uncharacterized protein Dyak_GE18016, isoform C [Drosophila yakuba]	GO:0005737;GO:0070062;GO:0044822;GO:0043209;GO:0005615;GO:0005515;GO:0010992;GO:0002020;GO:0005634	cytoplasm;extracellular exosome;RNA binding;myelin sheath;extracellular space;protein binding;ubiquitin homeostasis;protease binding;nucleus	K08770	UBC	http://www.genome.jp/dbget-bin/www_bget?ko:K08770	PPAR signaling pathway	ko03320	KOG0004(J)(Ubiquitin/40S ribosomal protein S27a fusion)	gnl|BL_ORD_ID|241262	sp|P0CG51|UBB_RAT Polyubiquitin-B OS=Rattus norvegicus GN=Ubb PE=1 SV=1
UBC	2.29486	2.25916	1.9728	1.81158	1.62675	1.91855	2.12966	2.10711	2.0596	1.96393	1.85944	1.96946	1.90477	2.14205	2.09061	1.65658	1.73247	1.78824	polyubiquitin [Artemia franciscana]	GO:0006296;GO:0005737;GO:0045742;GO:0070062;GO:0005654;GO:0070423;GO:0090263;GO:0019985;GO:0005978;GO:0075733;GO:0016055;GO:0007219;GO:0010008;GO:0000122;GO:0033209;GO:0005886;GO:0000165;GO:0051092;GO:0002223;GO:0060071;GO:0051436;GO:0031145;GO:0006297;GO:0002755;GO:0000086;GO:0034220;GO:0006283;GO:0044267;GO:0000209;GO:0042059;GO:0044822;GO:0070987;GO:0038061;GO:0042787;GO:0007179;GO:0005829;GO:…	nucleotide-excision repair, DNA incision, 5'-to lesion;cytoplasm;positive regulation of epidermal growth factor receptor signaling pathway;extracellular exosome;nucleoplasm;nucleotide-binding oligomerization domain containing signaling pathway;positive regulation of canonical Wnt signaling pathway;translesion synthesis;glycogen biosynthetic process;intracellular transport of virus;Wnt signaling p…	K08770	UBC	http://www.genome.jp/dbget-bin/www_bget?ko:K08770	PPAR signaling pathway	ko03320	KOG0004(J)(Ubiquitin/40S ribosomal protein S27a fusion)	gnl|BL_ORD_ID|233421	sp|P0CG69|UBIQP_DROME Polyubiquitin OS=Drosophila melanogaster GN=Ubi-p63E PE=3 SV=1
LOC102456586	1.33925	1.19396	1.25164	1.8493	1.9163	1.90086	1.51255	1.64768	1.60885	1.5463	1.63317	1.54506	1.65196	1.65466	1.72916	1.86004	1.67357	1.73965	PREDICTED: cyclic AMP-dependent transcription factor ATF-6 beta-like, partial [Pelodiscus sinensis]	GO:0005622;GO:0030968;GO:0005789;GO:0043565;GO:0044212;GO:0035497;GO:0003700;GO:0032993;GO:0006355;GO:0012505;GO:0006357;GO:0005634;GO:1990440	intracellular;endoplasmic reticulum unfolded protein response;endoplasmic reticulum membrane;sequence-specific DNA binding;transcription regulatory region DNA binding;cAMP response element binding;transcription factor activity, sequence-specific DNA binding;protein-DNA complex;regulation of transcription, DNA-templated;endomembrane system;regulation of transcription from RNA polymerase II promote…	K09049	ATF6B,CREBL1	http://www.genome.jp/dbget-bin/www_bget?ko:K09049	PI3K-Akt signaling pathway;TNF signaling pathway;cGMP - PKG signaling pathway;Protein processing in endoplasmic reticulum;Longevity regulating pathway - mammal;Adrenergic signaling in cardiomyocytes;Aldosterone synthesis and secretion;Estrogen signaling pathway;Insulin secretion;Thyroid hormone synthesis;Dopaminergic synapse	ko04151,ko04668,ko04022,ko04141,ko04211,ko04261,ko04925,ko04915,ko04911,ko04918,ko04728	-	gnl|BL_ORD_ID|297552;sp|O35451|ATF6B_MOUSE	sp|O35451|ATF6B_MOUSE Cyclic AMP-dependent transcription factor ATF-6 beta OS=Mus musculus GN=Atf6b PE=2 SV=1;sp|O35451|ATF6B_MOUSE Cyclic AMP-dependent transcription factor ATF-6 beta OS=Mus musculus GN=Atf6b PE=2 SV=1
PLPP3	1.51812	1.59517	1.52634	1.54986	1.81104	1.66801	1.85968	1.85443	1.81385	2.01339	1.92639	1.91259	1.77757	1.93328	1.65801	1.76597	1.66153	1.70783	PREDICTED: lipid phosphate phosphohydrolase 3, partial [Chelonia mydas];Lipid phosphate phosphohydrolase 3 [Chelonia mydas];PREDICTED: phospholipid phosphatase 3 isoform X5 [Panthera pardus];PREDICTED: lipid phosphate phosphohydrolase 3 [Pelodiscus sinensis]	GO:0060020;GO:0070062;GO:0007155;GO:1902068;GO:0005886;GO:0044330;GO:0050731;GO:0044329;GO:0034109;GO:0042392;GO:0001933;GO:0016021;GO:0030111;GO:0006644;GO:0050821;GO:0016020;GO:0001568;GO:0005887;GO:0005178;GO:0016337;GO:0060070;GO:0046839;GO:0042577;GO:0005794	Bergmann glial cell differentiation;extracellular exosome;cell adhesion;regulation of sphingolipid mediated signaling pathway;plasma membrane;canonical Wnt signaling pathway involved in positive regulation of wound healing;positive regulation of peptidyl-tyrosine phosphorylation;canonical Wnt signaling pathway involved in positive regulation of cell-cell adhesion;homotypic cell-cell adhesion;sphi…	K01080	PPAP2	http://www.genome.jp/dbget-bin/www_bget?ko:K01080	Phospholipase D signaling pathway;Ether lipid metabolism;Glycerolipid metabolism;Glycerophospholipid metabolism;Sphingolipid metabolism;Fat digestion and absorption;Fc gamma R-mediated phagocytosis	ko04072,ko00565,ko00561,ko00564,ko00600,ko04975,ko04666	KOG3030(I)(Lipid phosphate phosphatase and related enzymes of the PAP2 family)	sp|P97544|PLPP3_RAT;sp|O14495|PLPP3_HUMAN;sp|Q99JY8|PLPP3_MOUSE;gnl|BL_ORD_ID|129880	sp|P97544|PLPP3_RAT Phospholipid phosphatase 3 OS=Rattus norvegicus GN=Plpp3 PE=1 SV=1;sp|O14495|PLPP3_HUMAN Phospholipid phosphatase 3 OS=Homo sapiens GN=PLPP3 PE=1 SV=1;sp|Q99JY8|PLPP3_MOUSE Phospholipid phosphatase 3 OS=Mus musculus GN=Plpp3 PE=1 SV=1;sp|O14495|PLPP3_HUMAN Phospholipid phosphatase 3 OS=Homo sapiens GN=PLPP3 PE=1 SV=1
PRDX6	2.80837	2.71507	2.66608	2.88712	3.07184	2.9272	2.85426	2.84634	2.9091	2.94953	2.93409	2.80659	3.15067	3.24831	3.47816	3.11579	3.19371	3.30034	PREDICTED: peroxiredoxin-6 [Pelodiscus sinensis]	-	-	K11188	PRDX6	http://www.genome.jp/dbget-bin/www_bget?ko:K11188	Phenylpropanoid biosynthesis	ko00940	-	gnl|BL_ORD_ID|139624;sp|Q5ZJF4|PRDX6_CHICK	sp|Q5ZJF4|PRDX6_CHICK Peroxiredoxin-6 OS=Gallus gallus GN=PRDX6 PE=2 SV=3;sp|Q5ZJF4|PRDX6_CHICK Peroxiredoxin-6 OS=Gallus gallus GN=PRDX6 PE=2 SV=3
LOC102446381	2.48292	2.6344	2.29442	2.2441	2.0463	2.21229	2.44053	2.48652	2.27885	2.07569	2.03691	2.12166	2.51811	2.52683	2.64661	2.17327	2.30989	2.30077	PREDICTED: macrophage migration inhibitory factor-like [Pelodiscus sinensis]	-	-	K07253	MIF	http://www.genome.jp/dbget-bin/www_bget?ko:K07253	Phenylalanine metabolism;Tyrosine metabolism	ko00360,ko00350	-	sp|Q02960|MIF_CHICK;gnl|BL_ORD_ID|87967	sp|Q02960|MIF_CHICK Macrophage migration inhibitory factor OS=Gallus gallus GN=MIF PE=3 SV=3;sp|Q02960|MIF_CHICK Macrophage migration inhibitory factor OS=Gallus gallus GN=MIF PE=3 SV=3
ATP6V1E1	1.81418	1.80195	1.78132	1.72575	1.66427	1.74147	1.82138	1.79071	1.84217	1.77844	1.75335	1.68878	1.88178	1.92111	1.93258	1.78696	1.88144	1.89905	PREDICTED: V-type proton ATPase subunit E 1 [Pelodiscus sinensis]	GO:0046961;GO:0033178;GO:0015991	proton-transporting ATPase activity, rotational mechanism;proton-transporting two-sector ATPase complex, catalytic domain;ATP hydrolysis coupled proton transport	K02150	ATPeV1E,ATP6E	http://www.genome.jp/dbget-bin/www_bget?ko:K02150	Phagosome;mTOR signaling pathway;Oxidative phosphorylation;Collecting duct acid secretion;Synaptic vesicle cycle	ko04145,ko04150,ko00190,ko04966,ko04721	KOG1664(C)(Vacuolar H+-ATPase V1 sector, subunit E)	sp|P11019|VATE1_BOVIN;gnl|BL_ORD_ID|247098	sp|P11019|VATE1_BOVIN V-type proton ATPase subunit E 1 OS=Bos taurus GN=ATP6V1E1 PE=2 SV=1;sp|P11019|VATE1_BOVIN V-type proton ATPase subunit E 1 OS=Bos taurus GN=ATP6V1E1 PE=2 SV=1
ATP6V1G1	2.17009	2.24935	2.30593	2.14139	2.08411	2.20273	2.13928	2.13567	2.19573	2.18642	2.11066	2.19229	2.32705	2.28704	2.307	2.31342	2.33804	2.27775	PREDICTED: V-type proton ATPase subunit G 1 [Pelodiscus sinensis]	GO:0070062;GO:0005765;GO:0005622;GO:0008553;GO:0005886;GO:0005829;GO:0016887;GO:1902600;GO:0016820;GO:0051117;GO:0016471;GO:0015992	extracellular exosome;lysosomal membrane;intracellular;hydrogen-exporting ATPase activity, phosphorylative mechanism;plasma membrane;cytosol;ATPase activity;hydrogen ion transmembrane transport;hydrolase activity, acting on acid anhydrides, catalyzing transmembrane movement of substances;ATPase binding;vacuolar proton-transporting V-type ATPase complex;proton transport	K02152	ATPeV1G,ATP6G	http://www.genome.jp/dbget-bin/www_bget?ko:K02152	Phagosome;mTOR signaling pathway;Oxidative phosphorylation;Collecting duct acid secretion;Synaptic vesicle cycle	ko04145,ko04150,ko00190,ko04966,ko04721	-	gnl|BL_ORD_ID|242095;sp|P79251|VATG1_BOVIN	sp|P79251|VATG1_BOVIN V-type proton ATPase subunit G 1 OS=Bos taurus GN=ATP6V1G1 PE=1 SV=3;sp|P79251|VATG1_BOVIN V-type proton ATPase subunit G 1 OS=Bos taurus GN=ATP6V1G1 PE=1 SV=3
LOC102461013	1.88502	1.85733	1.74147	1.81763	1.8177	1.86723	1.95511	1.93646	1.9795	1.95828	1.88383	1.77269	1.97243	2.2086	2.24731	1.92701	2.08661	2.02926	PREDICTED: UDP-glucose 4-epimerase isoform X3 [Pelodiscus sinensis];PREDICTED: UDP-glucose 4-epimerase isoform X2 [Pelodiscus sinensis];PREDICTED: hydroxymethylglutaryl-CoA lyase, mitochondrial isoform X5 [Pelodiscus sinensis];PREDICTED: hydroxymethylglutaryl-CoA lyase, mitochondrial isoform X4 [Pelodiscus sinensis];PREDICTED: UDP-glucose 4-epimerase isoform X1 [Pelodiscus sinensis]	-	-	K01784;K01640	galE,GALE;E4.1.3.4,HMGCL,hmgL	http://www.genome.jp/dbget-bin/www_bget?ko:K01784;http://www.genome.jp/dbget-bin/www_bget?ko:K01640	Peroxisome;Valine, leucine and isoleucine degradation;Butanoate metabolism;Synthesis and degradation of ketone bodies;Geraniol degradation;Amino sugar and nucleotide sugar metabolism;Galactose metabolism	ko04146,ko00280,ko00650,ko00072,ko00281,ko00520,ko00052	KOG1371(M)(UDP-glucose 4-epimerase/UDP-sulfoquinovose synthase);KOG2367(E)(Alpha-isopropylmalate synthase/homocitrate synthase)	gnl|BL_ORD_ID|5997;gnl|BL_ORD_ID|396066;sp|Q8R059|GALE_MOUSE;sp|Q5R8D0|GALE_PONAB;gnl|BL_ORD_ID|397742	sp|Q8R059|GALE_MOUSE UDP-glucose 4-epimerase OS=Mus musculus GN=Gale PE=1 SV=1;sp|P35915|HMGCL_CHICK Hydroxymethylglutaryl-CoA lyase, mitochondrial OS=Gallus gallus GN=HMGCL PE=1 SV=1;sp|Q8R059|GALE_MOUSE UDP-glucose 4-epimerase OS=Mus musculus GN=Gale PE=1 SV=1;sp|Q5R8D0|GALE_PONAB UDP-glucose 4-epimerase OS=Pongo abelii GN=GALE PE=2 SV=1;sp|Q29448|HMGCL_BOVIN Hydroxymethylglutaryl-CoA lyase, mi…
ACOX2	2.26017	2.16385	2.44512	1.8884	2.10768	1.95202	2.38025	2.25086	2.25717	2.29144	2.39801	2.17531	1.74296	2.29994	2.2946	2.22917	2.16705	2.05511	PREDICTED: peroxisomal acyl-coenzyme A oxidase 2 [Pelodiscus sinensis]	GO:0008152;GO:0005739;GO:0050660;GO:0005102;GO:0005777;GO:0006635;GO:0055114;GO:0043231;GO:0016627;GO:0003997;GO:0006631	metabolic process;mitochondrion;flavin adenine dinucleotide binding;receptor binding;peroxisome;fatty acid beta-oxidation;oxidation-reduction process;intracellular membrane-bounded organelle;oxidoreductase activity, acting on the CH-CH group of donors;acyl-CoA oxidase activity;fatty acid metabolic process	K10214	ACOX2	http://www.genome.jp/dbget-bin/www_bget?ko:K10214	Peroxisome;Primary bile acid biosynthesis;PPAR signaling pathway	ko04146,ko00120,ko03320	KOG0135(IQ)(Pristanoyl-CoA/acyl-CoA oxidase)	sp|O02767|ACOX2_RABIT;sp|Q99424|ACOX2_HUMAN;gnl|BL_ORD_ID|264179	sp|O02767|ACOX2_RABIT Peroxisomal acyl-coenzyme A oxidase 2 OS=Oryctolagus cuniculus GN=ACOX2 PE=1 SV=1;sp|Q99424|ACOX2_HUMAN Peroxisomal acyl-coenzyme A oxidase 2 OS=Homo sapiens GN=ACOX2 PE=1 SV=1;sp|Q99424|ACOX2_HUMAN Peroxisomal acyl-coenzyme A oxidase 2 OS=Homo sapiens GN=ACOX2 PE=1 SV=1
SCP2	1.78226	1.87344	1.6878	1.54864	1.61055	1.70766	1.90233	1.95328	1.89221	1.99344	1.96483	1.88474	1.70044	1.94047	1.95569	1.65877	1.78226	1.85315	PREDICTED: non-specific lipid-transfer protein [Pelodiscus sinensis]	GO:0005737;GO:0070062;GO:0005654;GO:0008152;GO:0003824;GO:0070538;GO:0032385;GO:0005739;GO:0016747;GO:0043234;GO:1901373;GO:0032934;GO:0005102;GO:0045940;GO:0007031;GO:0000062;GO:0005777;GO:0032959;GO:0015914;GO:0006694;GO:0072659;GO:0016020;GO:0030301;GO:0036042;GO:0043231;GO:0015248;GO:0015485;GO:0008526	cytoplasm;extracellular exosome;nucleoplasm;metabolic process;catalytic activity;oleic acid binding;positive regulation of intracellular cholesterol transport;mitochondrion;transferase activity, transferring acyl groups other than amino-acyl groups;protein complex;lipid hydroperoxide transport;sterol binding;receptor binding;positive regulation of steroid metabolic process;peroxisome organization…	K08764	SCP2,SCPX	http://www.genome.jp/dbget-bin/www_bget?ko:K08764	Peroxisome;Primary bile acid biosynthesis;PPAR signaling pathway	ko04146,ko00120,ko03320	KOG1390(I)(Acetyl-CoA acetyltransferase)	sp|O62742|NLTP_RABIT;gnl|BL_ORD_ID|112764	sp|O62742|NLTP_RABIT Non-specific lipid-transfer protein OS=Oryctolagus cuniculus GN=SCP2 PE=1 SV=1;sp|O62742|NLTP_RABIT Non-specific lipid-transfer protein OS=Oryctolagus cuniculus GN=SCP2 PE=1 SV=1
ACOT8	1.70518	1.53453	1.62747	2.15972	2.1049	1.93712	1.75089	1.832	1.93722	1.84367	1.80393	1.76982	2.02011	1.89498	1.74437	1.86664	2.00689	1.92742	PREDICTED: acyl-coenzyme A thioesterase 8 [Pelodiscus sinensis]	GO:0047617;GO:0006637	acyl-CoA hydrolase activity;acyl-CoA metabolic process	K11992	ACOT8,PTE	http://www.genome.jp/dbget-bin/www_bget?ko:K11992	Peroxisome;Primary bile acid biosynthesis	ko04146,ko00120	-	gnl|BL_ORD_ID|264175;sp|O14734|ACOT8_HUMAN	sp|O14734|ACOT8_HUMAN Acyl-coenzyme A thioesterase 8 OS=Homo sapiens GN=ACOT8 PE=1 SV=1;sp|O14734|ACOT8_HUMAN Acyl-coenzyme A thioesterase 8 OS=Homo sapiens GN=ACOT8 PE=1 SV=1
HSD17B4	2.14557	2.29259	2.15622	1.9882	1.94591	2.13072	2.01166	2.06681	2.1682	2.08998	2.0571	2.04548	2.00958	2.21325	2.38193	2.12704	2.24507	2.19229	PREDICTED: peroxisomal multifunctional enzyme type 2 [Pelodiscus sinensis]	GO:0001649;GO:0008210;GO:0005739;GO:0005102;GO:0016508;GO:0005777;GO:0006635;GO:0036111;GO:0003857;GO:0016020;GO:0005778;GO:0008209;GO:0055114;GO:0016491;GO:0043231;GO:0042803;GO:0044594;GO:0036112;GO:0000038;GO:0060009	osteoblast differentiation;estrogen metabolic process;mitochondrion;receptor binding;long-chain-enoyl-CoA hydratase activity;peroxisome;fatty acid beta-oxidation;very long-chain fatty-acyl-CoA metabolic process;3-hydroxyacyl-CoA dehydrogenase activity;membrane;peroxisomal membrane;androgen metabolic process;oxidation-reduction process;oxidoreductase activity;intracellular membrane-bounded organel…	K12405	HSD17B4	http://www.genome.jp/dbget-bin/www_bget?ko:K12405	Peroxisome;Primary bile acid biosynthesis	ko04146,ko00120	KOG4170(I)(2-enoyl-CoA hydratase/3-hydroxyacyl-CoA dehydrogenase/Peroxisomal 3-ketoacyl-CoA-thiolase, sterol-binding domain and related enzymes)	gnl|BL_ORD_ID|358100;sp|P97852|DHB4_RAT;sp|P51659|DHB4_HUMAN	sp|P51659|DHB4_HUMAN Peroxisomal multifunctional enzyme type 2 OS=Homo sapiens GN=HSD17B4 PE=1 SV=3;sp|P97852|DHB4_RAT Peroxisomal multifunctional enzyme type 2 OS=Rattus norvegicus GN=Hsd17b4 PE=1 SV=3;sp|P51659|DHB4_HUMAN Peroxisomal multifunctional enzyme type 2 OS=Homo sapiens GN=HSD17B4 PE=1 SV=3
EHHADH	2.1002	1.85437	1.92205	1.61711	2.00962	1.74036	2.33357	2.21906	2.17316	2.23502	2.11624	2.01364	1.95813	2.2417	2.34153	1.86106	2.08146	2.07015	PREDICTED: peroxisomal bifunctional enzyme isoform X2 [Pelodiscus sinensis];PREDICTED: peroxisomal bifunctional enzyme isoform X1 [Pelodiscus sinensis]	GO:0008152;GO:0003824;GO:0003857;GO:0055114;GO:0016491;GO:0006631	metabolic process;catalytic activity;3-hydroxyacyl-CoA dehydrogenase activity;oxidation-reduction process;oxidoreductase activity;fatty acid metabolic process	K07514	EHHADH	http://www.genome.jp/dbget-bin/www_bget?ko:K07514	Peroxisome;Lysine degradation;Tryptophan metabolism;Valine, leucine and isoleucine degradation;Butanoate metabolism;Propanoate metabolism;Fatty acid degradation;beta-Alanine metabolism;Carbon metabolism;Fatty acid metabolism;Aminobenzoate degradation;Caprolactam degradation;PPAR signaling pathway	ko04146,ko00310,ko00380,ko00280,ko00650,ko00640,ko00071,ko00410,ko01200,ko01212,ko00627,ko00930,ko03320	KOG1679(I)(Enoyl-CoA hydratase)	gnl|BL_ORD_ID|369973;sp|Q08426|ECHP_HUMAN	sp|Q08426|ECHP_HUMAN Peroxisomal bifunctional enzyme OS=Homo sapiens GN=EHHADH PE=1 SV=3;sp|Q08426|ECHP_HUMAN Peroxisomal bifunctional enzyme OS=Homo sapiens GN=EHHADH PE=1 SV=3
GSTK1	2.27407	2.14401	2.14013	2.14666	2.15836	2.11378	2.31211	2.19868	2.17635	2.3748	2.34151	2.19496	2.27131	2.55496	2.53134	2.26131	2.3689	2.45128	PREDICTED: glutathione S-transferase kappa 1 [Pelodiscus sinensis]	-	-	K13299	GSTK1	http://www.genome.jp/dbget-bin/www_bget?ko:K13299	Peroxisome;Glutathione metabolism;Drug metabolism - cytochrome P450;Metabolism of xenobiotics by cytochrome P450	ko04146,ko00480,ko00982,ko00980	-	gnl|BL_ORD_ID|30256;sp|Q9DCM2|GSTK1_MOUSE;sp|P24473|GSTK1_RAT	sp|Q9DCM2|GSTK1_MOUSE Glutathione S-transferase kappa 1 OS=Mus musculus GN=Gstk1 PE=1 SV=3;sp|Q9DCM2|GSTK1_MOUSE Glutathione S-transferase kappa 1 OS=Mus musculus GN=Gstk1 PE=1 SV=3;sp|P24473|GSTK1_RAT Glutathione S-transferase kappa 1 OS=Rattus norvegicus GN=Gstk1 PE=1 SV=3
CAT	1.97262	1.91803	1.92891	1.71366	1.87576	1.84954	2.0849	2.16107	2.0484	2.12398	2.20561	1.99878	1.96844	2.28963	2.25612	1.94414	2.0994	2.29259	catalase [Pelodiscus sinensis]<>AFP50152.1 catalase [Pelodiscus sinensis]	GO:0042744;GO:0004096;GO:0006979;GO:0055114;GO:0016491;GO:0004601;GO:0020037;GO:0046872	hydrogen peroxide catabolic process;catalase activity;response to oxidative stress;oxidation-reduction process;oxidoreductase activity;peroxidase activity;heme binding;metal ion binding	K03781	katE,CAT,catB,srpA	http://www.genome.jp/dbget-bin/www_bget?ko:K03781	Peroxisome;FoxO signaling pathway;MAPK signaling pathway - plant;MAPK signaling pathway - yeast;Tryptophan metabolism;Glyoxylate and dicarboxylate metabolism;Carbon metabolism;Longevity regulating pathway - mammal;Longevity regulating pathway - multiple species;Longevity regulating pathway - worm	ko04146,ko04068,ko04016,ko04011,ko00380,ko00630,ko01200,ko04211,ko04213,ko04212	KOG0047(P)(Catalase)	sp|P00432|CATA_BOVIN;sp|Q9PWF7|CATA_RUGRU;gnl|BL_ORD_ID|310524	sp|P00432|CATA_BOVIN Catalase OS=Bos taurus GN=CAT PE=1 SV=3;sp|Q9PWF7|CATA_RUGRU Catalase OS=Rugosa rugosa GN=cat PE=2 SV=3;sp|P00432|CATA_BOVIN Catalase OS=Bos taurus GN=CAT PE=1 SV=3
ECI2	1.94797	2.08586	1.89243	1.58782	1.78132	1.80848	1.99612	1.999	1.96816	2.01941	1.96365	1.97823	1.94905	2.06371	2.17676	1.93782	2.00724	2.00247	PREDICTED: enoyl-CoA delta isomerase 2, mitochondrial [Pelodiscus sinensis]	GO:0005654;GO:0008152;GO:0003824;GO:0005739;GO:0009062;GO:0005102;GO:0000062;GO:0016020;GO:0043231;GO:0004165;GO:0005782	nucleoplasm;metabolic process;catalytic activity;mitochondrion;fatty acid catabolic process;receptor binding;fatty-acyl-CoA binding;membrane;intracellular membrane-bounded organelle;dodecenoyl-CoA delta-isomerase activity;peroxisomal matrix	K13239	PECI	http://www.genome.jp/dbget-bin/www_bget?ko:K13239	Peroxisome;Fatty acid degradation	ko04146,ko00071	KOG0016(I)(Enoyl-CoA hydratase/isomerase)	sp|O75521|ECI2_HUMAN;gnl|BL_ORD_ID|367657	sp|O75521|ECI2_HUMAN Enoyl-CoA delta isomerase 2, mitochondrial OS=Homo sapiens GN=ECI2 PE=1 SV=4;sp|O75521|ECI2_HUMAN Enoyl-CoA delta isomerase 2, mitochondrial OS=Homo sapiens GN=ECI2 PE=1 SV=4
IDH1	2.30374	2.19098	2.22381	2.01737	2.2058	2.04376	2.56484	2.47898	2.40453	2.5509	2.44813	2.3982	2.16322	2.53499	2.56902	2.10711	2.28341	2.35514	PREDICTED: isocitrate dehydrogenase [NADP] cytoplasmic [Pelodiscus sinensis]	GO:0005737;GO:0070062;GO:0071071;GO:0006979;GO:0004450;GO:0006749;GO:0006103;GO:0000287;GO:0055114;GO:0060696;GO:0004448;GO:0005739;GO:0016491;GO:0042803;GO:0005102;GO:0016616;GO:0005777;GO:0006099;GO:0005829;GO:0006102;GO:0051287;GO:0046872	cytoplasm;extracellular exosome;regulation of phospholipid biosynthetic process;response to oxidative stress;isocitrate dehydrogenase (NADP+) activity;glutathione metabolic process;2-oxoglutarate metabolic process;magnesium ion binding;oxidation-reduction process;regulation of phospholipid catabolic process;isocitrate dehydrogenase activity;mitochondrion;oxidoreductase activity;protein homodimeri…	K00031	IDH1,IDH2,icd	http://www.genome.jp/dbget-bin/www_bget?ko:K00031	Peroxisome;Citrate cycle (TCA cycle);Carbon fixation pathways in prokaryotes;Glutathione metabolism;2-Oxocarboxylic acid metabolism;Biosynthesis of amino acids;Carbon metabolism	ko04146,ko00020,ko00720,ko00480,ko01210,ko01230,ko01200	KOG1526(C)(NADP-dependent isocitrate dehydrogenase)	gnl|BL_ORD_ID|42376;sp|P41562|IDHC_RAT	sp|P41562|IDHC_RAT Isocitrate dehydrogenase [NADP] cytoplasmic OS=Rattus norvegicus GN=Idh1 PE=1 SV=1;sp|P41562|IDHC_RAT Isocitrate dehydrogenase [NADP] cytoplasmic OS=Rattus norvegicus GN=Idh1 PE=1 SV=1
DAO	2.53193	2.40714	2.1724	2.02588	2.11177	2.32158	2.61682	2.60653	2.38602	2.17327	2.11869	2.23792	2.51428	2.81616	2.86116	2.17211	2.41546	2.37086	PREDICTED: D-amino-acid oxidase [Pelodiscus sinensis]	GO:0046416;GO:0042416;GO:0005102;GO:0046983;GO:0005741;GO:0005777;GO:0005829;GO:0006562;GO:0036088;GO:0005778;GO:0055114;GO:0016491;GO:0071949;GO:0003884;GO:0055130;GO:0070178;GO:0048037	D-amino acid metabolic process;dopamine biosynthetic process;receptor binding;protein dimerization activity;mitochondrial outer membrane;peroxisome;cytosol;proline catabolic process;D-serine catabolic process;peroxisomal membrane;oxidation-reduction process;oxidoreductase activity;FAD binding;D-amino-acid oxidase activity;D-alanine catabolic process;D-serine metabolic process;cofactor binding	K00273	DAO,aao	http://www.genome.jp/dbget-bin/www_bget?ko:K00273	Peroxisome;Arginine and proline metabolism;Glycine, serine and threonine metabolism;Penicillin and cephalosporin biosynthesis;D-Arginine and D-ornithine metabolism	ko04146,ko00330,ko00260,ko00311,ko00472	KOG3923(E)(D-aspartate oxidase)	sp|A2V9Y8|OXDA_MACFA;gnl|BL_ORD_ID|431623	sp|A2V9Y8|OXDA_MACFA D-amino-acid oxidase OS=Macaca fascicularis GN=DAO PE=2 SV=1;sp|A2V9Y8|OXDA_MACFA D-amino-acid oxidase OS=Macaca fascicularis GN=DAO PE=2 SV=1
CROT	1.82982	1.91556	1.67274	1.58274	1.70578	1.63377	1.86759	1.90059	1.84491	1.91297	1.85661	1.81518	1.86923	2.01502	2.04415	1.93872	1.95904	1.96741	PREDICTED: peroxisomal carnitine O-octanoyltransferase isoform X2 [Pelodiscus sinensis];PREDICTED: peroxisomal carnitine O-octanoyltransferase isoform X1 [Pelodiscus sinensis]	GO:0016740;GO:0016746	transferase activity;transferase activity, transferring acyl groups	K05940	CROT	http://www.genome.jp/dbget-bin/www_bget?ko:K05940	Peroxisome	ko04146	KOG3717(I)(Carnitine O-acyltransferase CRAT)	gnl|BL_ORD_ID|426371;sp|Q9DC50|OCTC_MOUSE;sp|O19094|OCTC_BOVIN	sp|O19094|OCTC_BOVIN Peroxisomal carnitine O-octanoyltransferase OS=Bos taurus GN=CROT PE=1 SV=1;sp|Q9DC50|OCTC_MOUSE Peroxisomal carnitine O-octanoyltransferase OS=Mus musculus GN=Crot PE=1 SV=1;sp|O19094|OCTC_BOVIN Peroxisomal carnitine O-octanoyltransferase OS=Bos taurus GN=CROT PE=1 SV=1
PAOX	1.53605	1.47232	1.59318	1.80794	1.85058	1.88958	1.74327	1.68824	1.858	1.80223	1.75572	1.74943	2.01161	2.16011	2.19349	2.07733	2.13239	1.99904	PREDICTED: LOW QUALITY PROTEIN: peroxisomal N(1)-acetyl-spermine/spermidine oxidase, partial [Pelodiscus sinensis]	GO:0055114;GO:0016491	oxidation-reduction process;oxidoreductase activity	K00308	PAOX	http://www.genome.jp/dbget-bin/www_bget?ko:K00308	Peroxisome	ko04146	KOG0029(Q)(Amine oxidase)	gnl|BL_ORD_ID|118453	sp|Q6QHF9|PAOX_HUMAN Peroxisomal N(1)-acetyl-spermine/spermidine oxidase OS=Homo sapiens GN=PAOX PE=1 SV=3
PEX19	1.69073	1.60487	1.82223	1.89154	1.92706	1.90671	2.00975	1.90053	1.97763	1.99047	1.95852	1.9208	2.07096	2.16548	2.16524	2.09774	2.14358	2.13897	PREDICTED: peroxisomal biogenesis factor 19 isoform X1 [Chrysemys picta bellii];PREDICTED: peroxisomal biogenesis factor 19 [Chelonia mydas];PREDICTED: peroxisomal biogenesis factor 19 isoform X2 [Chrysemys picta bellii]	GO:0005777	peroxisome	K13337	PEX19	http://www.genome.jp/dbget-bin/www_bget?ko:K13337	Peroxisome	ko04146	KOG3133(U)(40 kDa farnesylated protein associated with peroxisomes)	sp|Q3SZD1|PEX19_BOVIN;gnl|BL_ORD_ID|123225	sp|Q3SZD1|PEX19_BOVIN Peroxisomal biogenesis factor 19 OS=Bos taurus GN=PEX19 PE=2 SV=1;sp|Q3SZD1|PEX19_BOVIN Peroxisomal biogenesis factor 19 OS=Bos taurus GN=PEX19 PE=2 SV=1
PEX5	1.52492	1.44762	1.52127	1.6066	1.63859	1.64787	1.77924	1.64729	1.81298	1.70586	1.71559	1.61752	1.76065	1.80325	1.84336	1.69653	1.75982	1.86225	PREDICTED: peroxisomal biogenesis factor 5 [Pelodiscus sinensis]	-	-	K13342	PEX5,PXR1	http://www.genome.jp/dbget-bin/www_bget?ko:K13342	Peroxisome	ko04146	KOG1124(R)(FOG: TPR repeat)	gnl|BL_ORD_ID|123873;sp|O70525|PEX5_CAVPO	sp|Q5ZMQ9|PEX5_CHICK Peroxisomal targeting signal 1 receptor OS=Gallus gallus GN=PEX5 PE=2 SV=1;sp|O70525|PEX5_CAVPO Peroxisomal targeting signal 1 receptor OS=Cavia porcellus GN=PEX5 PE=2 SV=1
PEX6	1.6291	1.56122	1.74648	2.03543	2.00303	1.95211	1.68966	1.72722	1.94802	1.71139	1.81816	1.75151	2.08243	2.10452	2.01808	2.02674	2.05778	1.93283	PREDICTED: LOW QUALITY PROTEIN: peroxisome biogenesis factor 6 [Pelodiscus sinensis]	-	-	K13339	PEX6,PXAAA1	http://www.genome.jp/dbget-bin/www_bget?ko:K13339	Peroxisome	ko04146	KOG0733(O)(Nuclear AAA ATPase (VCP subfamily))	sp|Q99LC9|PEX6_MOUSE;sp|Q13608|PEX6_HUMAN;gnl|BL_ORD_ID|119491	sp|Q99LC9|PEX6_MOUSE Peroxisome assembly factor 2 OS=Mus musculus GN=Pex6 PE=1 SV=1;sp|Q13608|PEX6_HUMAN Peroxisome assembly factor 2 OS=Homo sapiens GN=PEX6 PE=1 SV=2;sp|Q99LC9|PEX6_MOUSE Peroxisome assembly factor 2 OS=Mus musculus GN=Pex6 PE=1 SV=1
PRDX1	2.61981	2.6217	2.52131	2.42589	2.47026	2.54113	2.59972	2.72013	2.57422	2.6596	2.44074	2.59558	2.5123	2.795	2.55416	2.40236	2.51346	2.52265	PREDICTED: peroxiredoxin-1 [Pelodiscus sinensis]	-	-	K13279	PRDX1	http://www.genome.jp/dbget-bin/www_bget?ko:K13279	Peroxisome	ko04146	KOG0852(O)(Alkyl hydroperoxide reductase, thiol specific antioxidant and related enzymes)	gnl|BL_ORD_ID|139620	sp|Q06830|PRDX1_HUMAN Peroxiredoxin-1 OS=Homo sapiens GN=PRDX1 PE=1 SV=1
PXMP2	2.04376	1.91492	2.05998	1.90843	1.95352	1.98123	2.06427	1.87151	1.98753	1.91934	1.93636	2.04696	1.95535	2.38762	2.11817	2.17418	2.28448	2.20436	PREDICTED: peroxisomal membrane protein 2, partial [Pelodiscus sinensis]	GO:0005737;GO:0043234;GO:0016021;GO:0016020;GO:0005778	cytoplasm;protein complex;integral component of membrane;membrane;peroxisomal membrane	K13347	PXMP2,PMP22	http://www.genome.jp/dbget-bin/www_bget?ko:K13347	Peroxisome	ko04146	KOG1944(R)(Peroxisomal membrane protein MPV17 and related proteins)	gnl|BL_ORD_ID|436122;sp|Q2KIY1|PXMP2_BOVIN	sp|Q2KIY1|PXMP2_BOVIN Peroxisomal membrane protein 2 OS=Bos taurus GN=PXMP2 PE=2 SV=3;sp|Q2KIY1|PXMP2_BOVIN Peroxisomal membrane protein 2 OS=Bos taurus GN=PXMP2 PE=2 SV=3
LOC102461584	2.13497	2.21877	2.12428	2.34412	2.15305	2.31628	2.05411	2.1174	2.03346	2.08881	2.0774	1.98869	2.07987	2.09531	2.00286	1.93952	2.11126	2.06273	PREDICTED: NADH dehydrogenase [ubiquinone] 1 subunit C1, mitochondrial [Chrysemys picta bellii]	GO:0016020;GO:0005747;GO:0016021;GO:0005739	membrane;mitochondrial respiratory chain complex I;integral component of membrane;mitochondrion	K03967	NDUFC1	http://www.genome.jp/dbget-bin/www_bget?ko:K03967	Oxidative phosphorylation;Retrograde endocannabinoid signaling	ko00190,ko04723	-	sp|Q02376|NDUC1_BOVIN;sp|Q0MQF6|NDUC1_PANTR;gnl|BL_ORD_ID|115700	sp|Q02376|NDUC1_BOVIN NADH dehydrogenase [ubiquinone] 1 subunit C1, mitochondrial OS=Bos taurus GN=NDUFC1 PE=1 SV=1;sp|Q0MQF6|NDUC1_PANTR NADH dehydrogenase [ubiquinone] 1 subunit C1, mitochondrial OS=Pan troglodytes GN=NDUFC1 PE=3 SV=1;sp|Q02376|NDUC1_BOVIN NADH dehydrogenase [ubiquinone] 1 subunit C1, mitochondrial OS=Bos taurus GN=NDUFC1 PE=1 SV=1
NDUFA1	2.33486	2.42896	2.34622	2.56191	2.36197	2.68745	2.26076	2.33716	2.38193	2.14019	2.19934	1.99935	2.17998	2.15403	2.04937	2.08332	2.48566	1.92158	PREDICTED: NADH dehydrogenase [ubiquinone] 1 alpha subcomplex subunit 1 [Pelodiscus sinensis]	GO:0005747;GO:0005743;GO:0005739;GO:0006810;GO:0070469;GO:0016021;GO:0016020;GO:0055114;GO:0031966	mitochondrial respiratory chain complex I;mitochondrial inner membrane;mitochondrion;transport;respiratory chain;integral component of membrane;membrane;oxidation-reduction process;mitochondrial membrane	K03945	NDUFA1	http://www.genome.jp/dbget-bin/www_bget?ko:K03945	Oxidative phosphorylation;Retrograde endocannabinoid signaling	ko00190,ko04723	-	gnl|BL_ORD_ID|115333;sp|O35683|NDUA1_MOUSE	sp|O35683|NDUA1_MOUSE NADH dehydrogenase [ubiquinone] 1 alpha subcomplex subunit 1 OS=Mus musculus GN=Ndufa1 PE=1 SV=1;sp|O35683|NDUA1_MOUSE NADH dehydrogenase [ubiquinone] 1 alpha subcomplex subunit 1 OS=Mus musculus GN=Ndufa1 PE=1 SV=1
NDUFA3	2.53329	2.47774	2.48274	2.73211	2.588	2.71238	2.34388	2.36269	2.43303	2.48566	2.4755	2.32214	2.24127	2.37789	2.44727	2.3145	2.40993	2.38645	PREDICTED: NADH dehydrogenase [ubiquinone] 1 alpha subcomplex subunit 3 [Pelodiscus sinensis]	GO:0005747;GO:0005743;GO:0016021;GO:0016020	mitochondrial respiratory chain complex I;mitochondrial inner membrane;integral component of membrane;membrane	K03947	NDUFA3	http://www.genome.jp/dbget-bin/www_bget?ko:K03947	Oxidative phosphorylation;Retrograde endocannabinoid signaling	ko00190,ko04723	-	sp|Q0MQ95|NDUA3_GORGO;gnl|BL_ORD_ID|108935	sp|Q0MQ95|NDUA3_GORGO NADH dehydrogenase [ubiquinone] 1 alpha subcomplex subunit 3 OS=Gorilla gorilla gorilla GN=NDUFA3 PE=3 SV=1;sp|Q0MQ95|NDUA3_GORGO NADH dehydrogenase [ubiquinone] 1 alpha subcomplex subunit 3 OS=Gorilla gorilla gorilla GN=NDUFA3 PE=3 SV=1
NDUFA6	2.26461	2.37905	2.35015	2.47032	2.25777	2.51096	2.19723	2.20472	2.19659	2.19756	2.16307	2.20311	2.19753	2.14192	2.12103	2.12503	2.28301	2.23822	PREDICTED: NADH dehydrogenase [ubiquinone] 1 alpha subcomplex subunit 6, partial [Pelodiscus sinensis]	-	-	K03950	NDUFA6	http://www.genome.jp/dbget-bin/www_bget?ko:K03950	Oxidative phosphorylation;Retrograde endocannabinoid signaling	ko00190,ko04723	KOG3426(C)(NADH:ubiquinone oxidoreductase, NDUFA6/B14 subunit)	gnl|BL_ORD_ID|109615;sp|Q9CQZ5|NDUA6_MOUSE	sp|Q9CQZ5|NDUA6_MOUSE NADH dehydrogenase [ubiquinone] 1 alpha subcomplex subunit 6 OS=Mus musculus GN=Ndufa6 PE=1 SV=1;sp|Q9CQZ5|NDUA6_MOUSE NADH dehydrogenase [ubiquinone] 1 alpha subcomplex subunit 6 OS=Mus musculus GN=Ndufa6 PE=1 SV=1
NDUFAB1	2.026	2.02727	2.15073	1.80686	1.6291	1.68341	1.35717	1.44902	1.63719	1.53186	1.49485	1.67988	1.70526	1.64147	1.61794	1.78718	1.67043	1.73054	PREDICTED: LOW QUALITY PROTEIN: acyl carrier protein, mitochondrial, partial [Pelodiscus sinensis]	GO:0005747;GO:0000035;GO:0005743;GO:0046487;GO:0005739;GO:0006810;GO:0005509;GO:0070469;GO:0009249;GO:0032981;GO:0005504;GO:0005829;GO:0008137;GO:0006629;GO:0005759;GO:0055114;GO:0006120;GO:0006633;GO:0009245;GO:0031966;GO:0000036;GO:0005515;GO:0031177;GO:0006631	mitochondrial respiratory chain complex I;acyl binding;mitochondrial inner membrane;glyoxylate metabolic process;mitochondrion;transport;calcium ion binding;respiratory chain;protein lipoylation;mitochondrial respiratory chain complex I assembly;fatty acid binding;cytosol;NADH dehydrogenase (ubiquinone) activity;lipid metabolic process;mitochondrial matrix;oxidation-reduction process;mitochondria…	K03955	NDUFAB1	http://www.genome.jp/dbget-bin/www_bget?ko:K03955	Oxidative phosphorylation;Retrograde endocannabinoid signaling	ko00190,ko04723	KOG1748(CIQ)(Acyl carrier protein/NADH-ubiquinone oxidoreductase, NDUFAB1/SDAP subunit)	sp|Q0MQC1|ACPM_PONPY;gnl|BL_ORD_ID|268060	sp|Q0MQC1|ACPM_PONPY Acyl carrier protein, mitochondrial OS=Pongo pygmaeus GN=NDUFAB1 PE=2 SV=1;sp|Q9CR21|ACPM_MOUSE Acyl carrier protein, mitochondrial OS=Mus musculus GN=Ndufab1 PE=1 SV=1
LOC102444236	0.948902	1.84261	0.755875	1.39111	1.44436	1.45133	1.15746	1.66257	0.378398	1.27068	2.1213	1.30449	1.66586	2.04411	2.51816	1.66172	1.89856	1.75526	PREDICTED: cytochrome c oxidase subunit 6A, mitochondrial-like [Pelodiscus sinensis]	GO:0004129;GO:0005743;GO:0005739;GO:0005751;GO:0016021;GO:0016020	cytochrome-c oxidase activity;mitochondrial inner membrane;mitochondrion;mitochondrial respiratory chain complex IV;integral component of membrane;membrane	K02266	COX6A	http://www.genome.jp/dbget-bin/www_bget?ko:K02266	Oxidative phosphorylation;Cardiac muscle contraction	ko00190,ko04260	KOG3469(C)(Cytochrome c oxidase, subunit VIa/COX13)	gnl|BL_ORD_ID|316955	sp|O13082|COX6A_CYPCA Cytochrome c oxidase subunit 6A, mitochondrial OS=Cyprinus carpio PE=3 SV=1
LOC102447928	2.08991	1.91041	1.73183	1.50732	1.65801	1.62428	1.73215	1.63619	1.44762	1.57634	1.80922	1.5989	1.85848	1.79511	1.96454	1.9052	1.91761	2.01368	PREDICTED: cytochrome c oxidase subunit 5B, mitochondrial-like [Pelodiscus sinensis]	GO:0004129;GO:0042776;GO:0005751;GO:0006123;GO:0005740	cytochrome-c oxidase activity;mitochondrial ATP synthesis coupled proton transport;mitochondrial respiratory chain complex IV;mitochondrial electron transport, cytochrome c to oxygen;mitochondrial envelope	K02265	COX5B	http://www.genome.jp/dbget-bin/www_bget?ko:K02265	Oxidative phosphorylation;Cardiac muscle contraction	ko00190,ko04260	KOG3352(C)(Cytochrome c oxidase, subunit Vb/COX4)	sp|Q710D6|COX5B_VULVU;gnl|BL_ORD_ID|318820	sp|Q710D6|COX5B_VULVU Cytochrome c oxidase subunit 5B, mitochondrial OS=Vulpes vulpes GN=COX5B PE=1 SV=1;sp|P00428|COX5B_BOVIN Cytochrome c oxidase subunit 5B, mitochondrial OS=Bos taurus GN=COX5B PE=1 SV=2
LOC102454825	2.13729	2.17208	2.16507	2.06009	1.9234	2.17993	1.72206	1.7165	1.7676	1.6466	1.57715	1.77093	1.74162	1.61595	1.69723	1.62128	1.53895	1.68878	PREDICTED: cytochrome c oxidase subunit 7C, mitochondrial [Pelodiscus sinensis]	GO:0004129;GO:0005743;GO:0005739;GO:0016021;GO:0016020	cytochrome-c oxidase activity;mitochondrial inner membrane;mitochondrion;integral component of membrane;membrane	K02272	COX7C	http://www.genome.jp/dbget-bin/www_bget?ko:K02272	Oxidative phosphorylation;Cardiac muscle contraction	ko00190,ko04260	-	gnl|BL_ORD_ID|317877;sp|P00430|COX7C_BOVIN	sp|P00430|COX7C_BOVIN Cytochrome c oxidase subunit 7C, mitochondrial OS=Bos taurus GN=COX7C PE=1 SV=3;sp|P00430|COX7C_BOVIN Cytochrome c oxidase subunit 7C, mitochondrial OS=Bos taurus GN=COX7C PE=1 SV=3
LOC102457063	2.63417	2.68323	2.3309	2.61339	2.6378	2.29623	2.98642	2.89599	2.76335	3.10801	2.95698	2.5132	2.88417	3.32268	3.18038	3.14178	3.3258	3.15258	cytochrome c oxidase subunit 8A, mitochondrial [Alligator mississippiensis]	GO:0004129	cytochrome-c oxidase activity	K02273	COX8	http://www.genome.jp/dbget-bin/www_bget?ko:K02273	Oxidative phosphorylation;Cardiac muscle contraction	ko00190,ko04260	-	gnl|BL_ORD_ID|319920	sp|Q863G0|COX8B_ATEBE Cytochrome c oxidase subunit 8B, mitochondrial OS=Ateles belzebuth GN=COX8B PE=3 SV=1
LOC102463196	2.06614	1.95211	2.01624	2.27142	2.17126	2.15198	2.03719	1.81849	1.97603	1.85272	1.8638	1.95942	1.9834	1.93318	1.96099	1.79393	1.97813	1.88536	PREDICTED: cytochrome c oxidase subunit 5B, mitochondrial-like [Pelodiscus sinensis]	GO:0004129;GO:0005740	cytochrome-c oxidase activity;mitochondrial envelope	K02265	COX5B	http://www.genome.jp/dbget-bin/www_bget?ko:K02265	Oxidative phosphorylation;Cardiac muscle contraction	ko00190,ko04260	KOG3352(C)(Cytochrome c oxidase, subunit Vb/COX4)	sp|P00428|COX5B_BOVIN;gnl|BL_ORD_ID|318820	sp|P00428|COX5B_BOVIN Cytochrome c oxidase subunit 5B, mitochondrial OS=Bos taurus GN=COX5B PE=1 SV=2;sp|P00428|COX5B_BOVIN Cytochrome c oxidase subunit 5B, mitochondrial OS=Bos taurus GN=COX5B PE=1 SV=2
ATP5B	3.17941	3.02259	3.01836	3.4509	3.33679	3.50091	3.22744	3.21849	3.19236	3.17455	3.17624	3.22995	2.98447	3.06961	3.19034	3.04148	3.11122	3.14705	PREDICTED: ATP synthase subunit beta, mitochondrial, partial [Pelodiscus sinensis]	GO:0001649;GO:0070062;GO:0001525;GO:0005743;GO:0042645;GO:0005524;GO:0006754;GO:0005739;GO:0005886;GO:0046961;GO:0031012;GO:0006810;GO:0015986;GO:0045261;GO:0051453;GO:0006933;GO:0033178;GO:0016020;GO:0046933;GO:0043209;GO:0006629;GO:0000166;GO:0005753;GO:0015991;GO:0005515;GO:0016787;GO:0042288;GO:0016887;GO:0016820;GO:0046034;GO:0015992;GO:0005634;GO:0009986	osteoblast differentiation;extracellular exosome;angiogenesis;mitochondrial inner membrane;mitochondrial nucleoid;ATP binding;ATP biosynthetic process;mitochondrion;plasma membrane;proton-transporting ATPase activity, rotational mechanism;extracellular matrix;transport;ATP synthesis coupled proton transport;proton-transporting ATP synthase complex, catalytic core F(1);regulation of intracellular …	K02133	ATPeF1B,ATP5B,ATP2	http://www.genome.jp/dbget-bin/www_bget?ko:K02133	Oxidative phosphorylation	ko00190	KOG1353(C)(F0F1-type ATP synthase, alpha subunit)	gnl|BL_ORD_ID|298840	sp|P00829|ATPB_BOVIN ATP synthase subunit beta, mitochondrial OS=Bos taurus GN=ATP5B PE=1 SV=2
ATP5I	2.63037	2.66335	2.69126	2.94265	2.70559	2.92511	2.69229	2.69617	2.70497	2.58476	2.58043	2.60998	2.61557	2.53021	2.55272	2.50144	2.69922	2.65765	PREDICTED: ATP synthase subunit e, mitochondrial [Pelodiscus sinensis]	-	-	K02129	ATPeF0E,ATP5I	http://www.genome.jp/dbget-bin/www_bget?ko:K02129	Oxidative phosphorylation	ko00190	-	-	-
ATP5L	2.62745	2.64074	2.58753	2.89699	2.64846	2.88839	2.61017	2.58977	2.66416	2.5825	2.51379	2.68587	2.62691	2.41767	2.48904	2.48202	2.7733	2.55835	PREDICTED: ATP synthase subunit g, mitochondrial [Pelodiscus sinensis]	-	-	K02140	ATPeFG,ATP5L,ATP20	http://www.genome.jp/dbget-bin/www_bget?ko:K02140	Oxidative phosphorylation	ko00190	KOG4103(C)(Mitochondrial F1F0-ATP synthase, subunit g/ATP20)	gnl|BL_ORD_ID|295976;sp|O75964|ATP5L_HUMAN	sp|O75964|ATP5L_HUMAN ATP synthase subunit g, mitochondrial OS=Homo sapiens GN=ATP5L PE=1 SV=3;sp|O75964|ATP5L_HUMAN ATP synthase subunit g, mitochondrial OS=Homo sapiens GN=ATP5L PE=1 SV=3
FUCA1	1.77291	1.867	1.77714	1.58995	1.66483	1.69082	1.95966	1.99961	1.91619	1.96886	1.91142	1.87163	2.02226	2.12195	2.04918	1.99625	1.93049	2.06119	PREDICTED: tissue alpha-L-fucosidase isoform X1 [Chrysemys picta bellii];PREDICTED: tissue alpha-L-fucosidase [Pelodiscus sinensis]	-	-	K01206	FUCA	http://www.genome.jp/dbget-bin/www_bget?ko:K01206	Other glycan degradation	ko00511	-	gnl|BL_ORD_ID|1374;sp|P04066|FUCO_HUMAN	sp|P04066|FUCO_HUMAN Tissue alpha-L-fucosidase OS=Homo sapiens GN=FUCA1 PE=1 SV=4;sp|P04066|FUCO_HUMAN Tissue alpha-L-fucosidase OS=Homo sapiens GN=FUCA1 PE=1 SV=4
RPS6KA1	1.54937	1.64777	1.66708	1.5783	1.5382	1.51614	1.53694	1.56324	1.67302	1.5924	1.54283	1.59318	1.82027	1.69364	1.69723	1.80085	1.69329	1.76133	PREDICTED: LOW QUALITY PROTEIN: ribosomal protein S6 kinase alpha-1 [Pelodiscus sinensis]	GO:0005737;GO:0004672;GO:0000287;GO:0005524;GO:0043027;GO:0004674;GO:0043154;GO:0016310;GO:0016301;GO:0016740;GO:2000491;GO:0006915;GO:0045944;GO:0000166;GO:0004712;GO:0006468;GO:0043066;GO:0035556;GO:0005634	cytoplasm;protein kinase activity;magnesium ion binding;ATP binding;cysteine-type endopeptidase inhibitor activity involved in apoptotic process;protein serine/threonine kinase activity;negative regulation of cysteine-type endopeptidase activity involved in apoptotic process;phosphorylation;kinase activity;transferase activity;positive regulation of hepatic stellate cell activation;apoptotic proc…	K04373	RPS6KA,RSK2	http://www.genome.jp/dbget-bin/www_bget?ko:K04373	Oocyte meiosis;MAPK signaling pathway;mTOR signaling pathway;Progesterone-mediated oocyte maturation;Long-term potentiation;Neurotrophin signaling pathway	ko04114,ko04010,ko04150,ko04914,ko04720,ko04722	KOG0603(T)(Ribosomal protein S6 kinase)	sp|P18652|KS6AA_CHICK;gnl|BL_ORD_ID|54176	sp|P18652|KS6AA_CHICK Ribosomal protein S6 kinase 2 alpha OS=Gallus gallus GN=RPS6KA PE=2 SV=1;sp|P18652|KS6AA_CHICK Ribosomal protein S6 kinase 2 alpha OS=Gallus gallus GN=RPS6KA PE=2 SV=1
SNW1	2.06565	2.11153	2.02584	1.86308	1.93962	1.92469	2.19056	2.0707	1.92361	2.16876	2.12577	2.0177	2.06885	2.13255	2.16533	1.74115	2.13849	1.91545	SNW domain-containing protein 1 [Chelonia mydas];PREDICTED: SNW domain-containing protein 1 [Pelodiscus sinensis]	GO:0043923;GO:0070564;GO:0005654;GO:0008024;GO:0042809;GO:0000122;GO:0051571;GO:0048384;GO:0071013;GO:0045892;GO:0044822;GO:0042974;GO:0042771;GO:0008380;GO:0071146;GO:0003714;GO:0016363;GO:0050769;GO:0030511;GO:0048385;GO:0071300;GO:0045944;GO:0005681;GO:0006351;GO:0005112;GO:0046332;GO:0000398;GO:0070562;GO:0005634;GO:0048026;GO:0035257;GO:0003713	positive regulation by host of viral transcription;positive regulation of vitamin D receptor signaling pathway;nucleoplasm;cyclin/CDK positive transcription elongation factor complex;vitamin D receptor binding;negative regulation of transcription from RNA polymerase II promoter;positive regulation of histone H3-K4 methylation;retinoic acid receptor signaling pathway;catalytic step 2 spliceosome;n…	K06063	SNW1,SKIIP,SKIP	http://www.genome.jp/dbget-bin/www_bget?ko:K06063	Notch signaling pathway;Spliceosome	ko04330,ko03040	KOG2441(AB)(mRNA splicing factor/probable chromatin binding snw family nuclear protein)	sp|Q1JQE0|SNW1_BOVIN;gnl|BL_ORD_ID|208864	sp|Q1JQE0|SNW1_BOVIN SNW domain-containing protein 1 OS=Bos taurus GN=SNW1 PE=2 SV=1;sp|Q1JQE0|SNW1_BOVIN SNW domain-containing protein 1 OS=Bos taurus GN=SNW1 PE=2 SV=1
LOC102447536	1.51428	1.43377	1.55437	1.84726	1.91328	1.88807	1.86279	1.8496	1.74374	1.86576	1.86207	1.83104	1.76805	1.81258	1.73648	1.90347	1.85576	1.9509	PREDICTED: thyroid receptor-interacting protein 6-like isoform X2 [Pelodiscus sinensis];PREDICTED: thyroid receptor-interacting protein 6-like isoform X1 [Pelodiscus sinensis]	GO:0030335;GO:0005737;GO:0005925;GO:0045323;GO:0005149;GO:0005886;GO:0008588;GO:0044822;GO:0008270;GO:0019900;GO:0046872	positive regulation of cell migration;cytoplasm;focal adhesion;interleukin-1 receptor complex;interleukin-1 receptor binding;plasma membrane;release of cytoplasmic sequestered NF-kappaB;RNA binding;zinc ion binding;kinase binding;metal ion binding	K12792	TRIP6	http://www.genome.jp/dbget-bin/www_bget?ko:K12792	NOD-like receptor signaling pathway	ko04621	KOG1701(T)(Focal adhesion adaptor protein Paxillin and related LIM proteins)	sp|Q3SX26|TRIP6_BOVIN;gnl|BL_ORD_ID|224514	sp|Q3SX26|TRIP6_BOVIN Thyroid receptor-interacting protein 6 OS=Bos taurus GN=TRIP6 PE=2 SV=1;sp|Q3SX26|TRIP6_BOVIN Thyroid receptor-interacting protein 6 OS=Bos taurus GN=TRIP6 PE=2 SV=1
TXN	2.81649	2.82265	2.86669	3.03225	2.87329	2.9002	3.0032	2.99809	2.92769	2.93315	2.92485	2.88908	3.14567	3.25583	3.12384	3.02825	2.9287	3.13315	PREDICTED: thioredoxin [Pelodiscus sinensis]	-	-	K03671	trxA	http://www.genome.jp/dbget-bin/www_bget?ko:K03671	NOD-like receptor signaling pathway	ko04621	KOG0908(O)(Thioredoxin-like protein)	sp|P11232|THIO_RAT;gnl|BL_ORD_ID|513902	sp|P11232|THIO_RAT Thioredoxin OS=Rattus norvegicus GN=Txn PE=1 SV=2;sp|P08629|THIO_CHICK Thioredoxin OS=Gallus gallus GN=TXN PE=3 SV=2
LOC102453298	1.62992	1.61721	1.41246	1.39846	1.4979	1.63759	1.80638	1.81684	1.92737	1.87011	1.9309	1.8739	1.76782	2.00608	2.2052	1.95875	1.80814	2.11727	PREDICTED: carbonic anhydrase 2 [Pelodiscus sinensis]	GO:0005737;GO:0044070;GO:0070062;GO:0043209;GO:0004064;GO:0045177;GO:0046903;GO:0038166;GO:2001225;GO:0004089;GO:0005886;GO:0015670;GO:0002009;GO:0006730;GO:0032849;GO:2001150;GO:0005829;GO:0008270;GO:0051453;GO:0046872	cytoplasm;regulation of anion transport;extracellular exosome;myelin sheath;arylesterase activity;apical part of cell;secretion;angiotensin-activated signaling pathway;regulation of chloride transport;carbonate dehydratase activity;plasma membrane;carbon dioxide transport;morphogenesis of an epithelium;one-carbon metabolic process;positive regulation of cellular pH reduction;positive regulation o…	K18245	CA2	http://www.genome.jp/dbget-bin/www_bget?ko:K18245	Nitrogen metabolism;Bile secretion;Gastric acid secretion;Pancreatic secretion;Collecting duct acid secretion;Proximal tubule bicarbonate reclamation	ko00910,ko04976,ko04971,ko04972,ko04966,ko04964	KOG0382(R)(Carbonic anhydrase)	gnl|BL_ORD_ID|306568;sp|P07630|CAH2_CHICK	sp|P07630|CAH2_CHICK Carbonic anhydrase 2 OS=Gallus gallus GN=CA2 PE=2 SV=3;sp|P07630|CAH2_CHICK Carbonic anhydrase 2 OS=Gallus gallus GN=CA2 PE=2 SV=3
LOC102448323	1.54258	1.72908	1.60746	1.60895	1.49304	1.69697	1.61574	1.52917	1.64296	1.69082	1.72362	1.69461	1.95999	1.87697	1.98829	1.94512	1.9682	1.99765	PREDICTED: nicotinamide N-methyltransferase-like [Pelodiscus sinensis]	GO:0008168	methyltransferase activity	K00541	NNMT	http://www.genome.jp/dbget-bin/www_bget?ko:K00541	Nicotinate and nicotinamide metabolism	ko00760	-	gnl|BL_ORD_ID|422331	sp|Q06AV1|NNMT_PIG Nicotinamide N-methyltransferase OS=Sus scrofa GN=NNMT PE=2 SV=1
LOC102462063	2.37031	2.22868	2.21437	2.26449	2.0887	2.13586	1.99682	2.07317	2.09255	2.16167	1.98421	2.21974	1.45834	1.49052	1.3995	1.54382	1.72892	1.61225	PREDICTED: nicotinamide riboside kinase 2-like [Pelodiscus sinensis]	-	-	K10524	NRK1_2	http://www.genome.jp/dbget-bin/www_bget?ko:K10524	Nicotinate and nicotinamide metabolism	ko00760	KOG3308(F)(Uncharacterized protein of the uridine kinase family)	sp|Q9NPI5|NRK2_HUMAN;gnl|BL_ORD_ID|418475	sp|Q9NPI5|NRK2_HUMAN Nicotinamide riboside kinase 2 OS=Homo sapiens GN=NMRK2 PE=1 SV=1;sp|Q9NPI5|NRK2_HUMAN Nicotinamide riboside kinase 2 OS=Homo sapiens GN=NMRK2 PE=1 SV=1
MGAT2	1.83327	1.71999	1.76335	1.91761	1.87029	1.93252	1.95002	1.98601	1.9857	2.00234	1.97021	1.93349	1.99471	2.25804	2.147	1.93344	1.96736	2.00689	PREDICTED: alpha-1,6-mannosyl-glycoprotein 2-beta-N-acetylglucosaminyltransferase, partial [Chrysemys picta bellii]	GO:0008455;GO:0016740;GO:0005795;GO:0016021;GO:0009312;GO:0016757	alpha-1,6-mannosylglycoprotein 2-beta-N-acetylglucosaminyltransferase activity;transferase activity;Golgi stack;integral component of membrane;oligosaccharide biosynthetic process;transferase activity, transferring glycosyl groups	K00736	MGAT2	http://www.genome.jp/dbget-bin/www_bget?ko:K00736	N-Glycan biosynthesis;Various types of N-glycan biosynthesis	ko00510,ko00513	-	gnl|BL_ORD_ID|89663	sp|Q10469|MGAT2_HUMAN Alpha-1,6-mannosyl-glycoprotein 2-beta-N-acetylglucosaminyltransferase OS=Homo sapiens GN=MGAT2 PE=1 SV=1
LOC102449607	1.67394	1.20085	1.43361	1.61342	1.9432	1.70372	1.93039	1.76597	1.84553	1.84862	1.97239	1.73263	1.93767	2.15785	2.07151	1.93268	2.03362	2.03826	PREDICTED: intercellular adhesion molecule 5-like, partial [Pelodiscus sinensis]	-	-	K06490	ICAM1	http://www.genome.jp/dbget-bin/www_bget?ko:K06490	NF-kappa B signaling pathway;TNF signaling pathway;Cell adhesion molecules (CAMs);Leukocyte transendothelial migration;Natural killer cell mediated cytotoxicity	ko04064,ko04668,ko04514,ko04670,ko04650	-	sp|Q5NKU6|ICAM3_PANTR;sp|Q28730|ICAM5_RABIT;sp|Q5NKV9|ICAM1_GORGO;gnl|BL_ORD_ID|48165	sp|Q5NKU6|ICAM3_PANTR Intercellular adhesion molecule 3 OS=Pan troglodytes GN=ICAM3 PE=2 SV=1;sp|Q28730|ICAM5_RABIT Intercellular adhesion molecule 5 OS=Oryctolagus cuniculus GN=ICAM5 PE=2 SV=1;sp|Q5NKV9|ICAM1_GORGO Intercellular adhesion molecule 1 OS=Gorilla gorilla gorilla GN=ICAM1 PE=2 SV=1;sp|Q28730|ICAM5_RABIT Intercellular adhesion molecule 5 OS=Oryctolagus cuniculus GN=ICAM5 PE=2 SV=1
STAT3	1.36078	1.17926	1.36959	1.63205	1.74123	1.63498	1.7145	1.68592	1.63739	1.73239	1.81941	1.71834	1.63083	1.62798	1.55194	1.65782	1.48968	1.59073	PREDICTED: LOW QUALITY PROTEIN: signal transducer and activator of transcription 3 [Pelodiscus sinensis]	GO:0005737;GO:0004871;GO:0007165;GO:0003677;GO:0006351;GO:0003700;GO:0006355;GO:0005634	cytoplasm;signal transducer activity;signal transduction;DNA binding;transcription, DNA-templated;transcription factor activity, sequence-specific DNA binding;regulation of transcription, DNA-templated;nucleus	K04692	STAT3	http://www.genome.jp/dbget-bin/www_bget?ko:K04692	Necroptosis;Signaling pathways regulating pluripotency of stem cells;FoxO signaling pathway;HIF-1 signaling pathway;Jak-STAT signaling pathway;Adipocytokine signaling pathway;Prolactin signaling pathway;Chemokine signaling pathway;Th17 cell differentiation	ko04217,ko04550,ko04068,ko04066,ko04630,ko04920,ko04917,ko04062,ko04659	KOG3667(KT)(STAT protein)	sp|P40763|STAT3_HUMAN;sp|Q6DV79|STAT3_CHICK;gnl|BL_ORD_ID|499627	sp|P40763|STAT3_HUMAN Signal transducer and activator of transcription 3 OS=Homo sapiens GN=STAT3 PE=1 SV=2;sp|Q6DV79|STAT3_CHICK Signal transducer and activator of transcription 3 OS=Gallus gallus GN=STAT3 PE=1 SV=2;sp|P40763|STAT3_HUMAN Signal transducer and activator of transcription 3 OS=Homo sapiens GN=STAT3 PE=1 SV=2
CHMP4B	1.83436	1.9221	1.86847	1.73312	1.65982	1.79858	1.86159	1.82465	1.84584	1.89404	1.83954	1.7721	1.88593	1.90677	1.77276	1.89315	1.90504	1.85715	PREDICTED: charged multivesicular body protein 4b [Pelodiscus sinensis]	GO:0005737;GO:0006914;GO:0015031;GO:0070062;GO:0042802;GO:0031902;GO:0010824;GO:0010458;GO:0031468;GO:1901673;GO:0030496;GO:0039702;GO:0006810;GO:0030117;GO:0060548;GO:0051260;GO:0090148;GO:0007080;GO:0000920;GO:0098641;GO:0005768;GO:0000815;GO:1901215;GO:1902188;GO:0005829;GO:0016020;GO:1902902;GO:0005913;GO:0009898;GO:0036438;GO:0098609;GO:0042803;GO:0006620;GO:0090611;GO:0005635;GO:0000281;GO:…	cytoplasm;autophagy;protein transport;extracellular exosome;identical protein binding;late endosome membrane;regulation of centrosome duplication;exit from mitosis;nuclear envelope reassembly;regulation of mitotic spindle assembly;midbody;viral budding via host ESCRT complex;transport;membrane coat;negative regulation of cell death;protein homooligomerization;membrane fission;mitotic metaphase pl…	K12194	CHMP4,SNF7,VPS32	http://www.genome.jp/dbget-bin/www_bget?ko:K12194	Necroptosis;Endocytosis	ko04217,ko04144	KOG1656(U)(Protein involved in glucose derepression and pre-vacuolar endosome protein sorting)	gnl|BL_ORD_ID|328328;sp|Q5ZHP5|CHM4B_CHICK	sp|Q5ZHP5|CHM4B_CHICK Charged multivesicular body protein 4b OS=Gallus gallus GN=CHMP4B PE=2 SV=1;sp|Q5ZHP5|CHM4B_CHICK Charged multivesicular body protein 4b OS=Gallus gallus GN=CHMP4B PE=2 SV=1
PYGL	2.08433	2.10826	2.07631	2.08629	2.08497	2.18167	2.13947	2.13821	2.20796	2.28296	2.28641	2.12231	2.47258	2.86189	2.31723	2.5258	2.24529	2.40204	PREDICTED: glycogen phosphorylase, liver form isoform X2 [Pelodiscus sinensis];PREDICTED: glycogen phosphorylase, liver form isoform X1 [Pelodiscus sinensis]	-	-	K00688	E2.4.1.1,glgP,PYG	http://www.genome.jp/dbget-bin/www_bget?ko:K00688	Necroptosis;Biofilm formation - Escherichia coli;Starch and sucrose metabolism;Glucagon signaling pathway;Insulin signaling pathway	ko04217,ko02026,ko00500,ko04922,ko04910	KOG2099(G)(Glycogen phosphorylase)	gnl|BL_ORD_ID|437028;sp|P06737|PYGL_HUMAN;sp|Q5MIB5|PYGL_SHEEP;sp|Q9ET01|PYGL_MOUSE;sp|P09811|PYGL_RAT	sp|P09811|PYGL_RAT Glycogen phosphorylase, liver form OS=Rattus norvegicus GN=Pygl PE=1 SV=5;sp|P06737|PYGL_HUMAN Glycogen phosphorylase, liver form OS=Homo sapiens GN=PYGL PE=1 SV=4;sp|Q5MIB5|PYGL_SHEEP Glycogen phosphorylase, liver form OS=Ovis aries GN=PYGL PE=2 SV=3;sp|Q9ET01|PYGL_MOUSE Glycogen phosphorylase, liver form OS=Mus musculus GN=Pygl PE=1 SV=4;sp|P09811|PYGL_RAT Glycogen phosphoryl…
GLUD1	2.63085	2.37334	2.58187	1.84936	2.38032	2.06028	2.88803	2.7501	2.51623	2.5654	2.71277	2.60013	1.97202	2.50834	2.20008	1.99712	2.1637	2.10151	PREDICTED: LOW QUALITY PROTEIN: glutamate dehydrogenase 1, mitochondrial [Pelodiscus sinensis]	GO:0006520;GO:0005743;GO:0005759;GO:0072350;GO:0055114;GO:0005739;GO:0016491;GO:0006541;GO:0004353;GO:0032024;GO:0016639	cellular amino acid metabolic process;mitochondrial inner membrane;mitochondrial matrix;tricarboxylic acid metabolic process;oxidation-reduction process;mitochondrion;oxidoreductase activity;glutamine metabolic process;glutamate dehydrogenase [NAD(P)+] activity;positive regulation of insulin secretion;oxidoreductase activity, acting on the CH-NH2 group of donors, NAD or NADP as acceptor	K00261	GLUD1_2,gdhA	http://www.genome.jp/dbget-bin/www_bget?ko:K00261	Necroptosis;Alanine, aspartate and glutamate metabolism;Arginine biosynthesis;Nitrogen metabolism;D-Glutamine and D-glutamate metabolism;Carbon metabolism;Proximal tubule bicarbonate reclamation	ko04217,ko00250,ko00220,ko00910,ko00471,ko01200,ko04964	KOG2250(E)(Glutamate/leucine/phenylalanine/valine dehydrogenases)	gnl|BL_ORD_ID|356285;sp|P00367|DHE3_HUMAN	sp|P00367|DHE3_HUMAN Glutamate dehydrogenase 1, mitochondrial OS=Homo sapiens GN=GLUD1 PE=1 SV=2;sp|P00367|DHE3_HUMAN Glutamate dehydrogenase 1, mitochondrial OS=Homo sapiens GN=GLUD1 PE=1 SV=2
LOC102447576	2.02387	2.07372	2.04092	2.14292	1.98168	1.96685	1.86694	1.97188	1.95168	1.88598	1.85516	1.91981	1.49402	1.39182	1.33885	1.50826	1.57553	1.59373	PREDICTED: core histone macro-H2A.2 [Pelodiscus sinensis]	GO:0007420;GO:0070062;GO:0005654;GO:0006334;GO:0003677;GO:0000122;GO:0071169;GO:0000786;GO:0046982;GO:0016021;GO:0045618;GO:0035098;GO:0016020;GO:0000790;GO:0000977;GO:0044212;GO:0045814;GO:0000784;GO:0031490;GO:0005694;GO:0007549;GO:0005634;GO:1901837	brain development;extracellular exosome;nucleoplasm;nucleosome assembly;DNA binding;negative regulation of transcription from RNA polymerase II promoter;establishment of protein localization to chromatin;nucleosome;protein heterodimerization activity;integral component of membrane;positive regulation of keratinocyte differentiation;ESC/E(Z) complex;membrane;nuclear chromatin;RNA polymerase II reg…	K11251	H2A	http://www.genome.jp/dbget-bin/www_bget?ko:K11251	Necroptosis	ko04217	KOG1756(B)(Histone 2A)	sp|Q8CCK0|H2AW_MOUSE;gnl|BL_ORD_ID|29649	sp|Q8CCK0|H2AW_MOUSE Core histone macro-H2A.2 OS=Mus musculus GN=H2afy2 PE=1 SV=3;sp|Q8CCK0|H2AW_MOUSE Core histone macro-H2A.2 OS=Mus musculus GN=H2afy2 PE=1 SV=3
LOC102462627	2.374	2.40119	2.32597	2.51254	2.33153	2.48031	2.33047	2.43596	2.34731	2.35147	2.31909	2.37436	2.03659	2.13309	2.02259	1.92521	2.06397	2.02991	PREDICTED: histone H2A.Z [Aotus nancymaae];PREDICTED: histone H2A.Z-like [Cercocebus atys]	GO:0070062;GO:0003677;GO:0000786;GO:0071392;GO:0000980;GO:0046982;GO:0005719;GO:0000978;GO:0000790;GO:0045944;GO:0000979;GO:0005720;GO:0031492;GO:0031490;GO:0006342;GO:0005694;GO:0005634	extracellular exosome;DNA binding;nucleosome;cellular response to estradiol stimulus;RNA polymerase II distal enhancer sequence-specific DNA binding;protein heterodimerization activity;nuclear euchromatin;RNA polymerase II core promoter proximal region sequence-specific DNA binding;nuclear chromatin;positive regulation of transcription from RNA polymerase II promoter;RNA polymerase II core promot…	K11251	H2A	http://www.genome.jp/dbget-bin/www_bget?ko:K11251	Necroptosis	ko04217	KOG1757(B)(Histone 2A)	sp|Q5ZMD6|H2AZ_CHICK;gnl|BL_ORD_ID|32857	sp|Q5ZMD6|H2AZ_CHICK Histone H2A.Z OS=Gallus gallus GN=H2AFZ PE=1 SV=3;sp|Q5ZMD6|H2AZ_CHICK Histone H2A.Z OS=Gallus gallus GN=H2AFZ PE=1 SV=3
LOC102463597	2.8273	2.81334	2.86539	2.9439	2.77735	2.94558	2.66881	2.78297	2.79079	2.72178	2.73259	2.83484	2.30931	2.24376	2.21075	2.15612	2.41355	2.38041	PREDICTED: histone H2A.V [Camelus ferus];PREDICTED: histone H2A.V [Aquila chrysaetos canadensis]	-	-	K11251	H2A	http://www.genome.jp/dbget-bin/www_bget?ko:K11251	Necroptosis	ko04217	KOG1757(B)(Histone 2A)	gnl|BL_ORD_ID|36380	sp|P02272|H2AV_CHICK Histone H2A.V OS=Gallus gallus GN=H2AFV PE=1 SV=2
GALNT11	1.71198	1.76708	1.64246	1.48785	1.61162	1.58816	1.9058	1.85546	1.83923	1.93912	1.85382	1.80706	1.83518	2.07987	2.06043	1.84782	1.87944	1.90211	PREDICTED: polypeptide N-acetylgalactosaminyltransferase 11 isoform X1 [Pelodiscus sinensis];PREDICTED: polypeptide N-acetylgalactosaminyltransferase 11 isoform X2 [Pelodiscus sinensis]	GO:0018243;GO:0006486;GO:0016740;GO:0016021;GO:0030246;GO:0016020;GO:0004653;GO:0016757;GO:0005112;GO:0000139;GO:0005794	protein O-linked glycosylation via threonine;protein glycosylation;transferase activity;integral component of membrane;carbohydrate binding;membrane;polypeptide N-acetylgalactosaminyltransferase activity;transferase activity, transferring glycosyl groups;Notch binding;Golgi membrane;Golgi apparatus	K00710	GALNT	http://www.genome.jp/dbget-bin/www_bget?ko:K00710	Mucin type O-glycan biosynthesis	ko00512	KOG3736(O)(Polypeptide N-acetylgalactosaminyltransferase)	gnl|BL_ORD_ID|25408;sp|Q8NCW6|GLT11_HUMAN	sp|Q8NCW6|GLT11_HUMAN Polypeptide N-acetylgalactosaminyltransferase 11 OS=Homo sapiens GN=GALNT11 PE=1 SV=2;sp|Q8NCW6|GLT11_HUMAN Polypeptide N-acetylgalactosaminyltransferase 11 OS=Homo sapiens GN=GALNT11 PE=1 SV=2
LAMTOR2	2.11066	2.07577	2.05732	2.32333	2.28872	2.23121	2.1867	2.29243	2.03306	2.12281	2.17981	2.00552	2.2777	2.63926	2.60808	2.25205	2.16364	2.46773	PREDICTED: ragulator complex protein LAMTOR2 [Pelodiscus sinensis]	GO:0016020;GO:0005085;GO:0071986;GO:0000186;GO:0070062;GO:0005765;GO:0031902;GO:0005764;GO:0016236;GO:0010008;GO:0005770;GO:0016049;GO:0000165;GO:0071230;GO:0005515;GO:0032947;GO:0005768;GO:0034613;GO:0043547;GO:0007050;GO:0032008	membrane;guanyl-nucleotide exchange factor activity;Ragulator complex;activation of MAPKK activity;extracellular exosome;lysosomal membrane;late endosome membrane;lysosome;macroautophagy;endosome membrane;late endosome;cell growth;MAPK cascade;cellular response to amino acid stimulus;protein binding;protein complex scaffold activity;endosome;cellular protein localization;positive regulation of GT…	K20398	LAMTOR2	http://www.genome.jp/dbget-bin/www_bget?ko:K20398	mTOR signaling pathway	ko04150	KOG4107(T)(MP1 adaptor interacting protein P14)	gnl|BL_ORD_ID|78484;sp|B5FYY5|LTOR2_TAEGU	sp|B5FYY5|LTOR2_TAEGU Ragulator complex protein LAMTOR2 OS=Taeniopygia guttata GN=LAMTOR2 PE=2 SV=1;sp|B5FYY5|LTOR2_TAEGU Ragulator complex protein LAMTOR2 OS=Taeniopygia guttata GN=LAMTOR2 PE=2 SV=1
LAMTOR5	1.71742	1.81365	1.79906	1.82536	1.67321	1.90542	1.41697	1.50352	1.56217	1.53983	1.57623	1.46702	1.79595	1.20493	1.43727	1.77568	1.72362	1.60325	PREDICTED: ragulator complex protein LAMTOR5 [Pelodiscus sinensis]	GO:0019079;GO:0071986;GO:0005737;GO:0043154;GO:0043066	viral genome replication;Ragulator complex;cytoplasm;negative regulation of cysteine-type endopeptidase activity involved in apoptotic process;negative regulation of apoptotic process	K16344	LAMTOR5,HBXIP	http://www.genome.jp/dbget-bin/www_bget?ko:K16344	mTOR signaling pathway	ko04150	-	gnl|BL_ORD_ID|78490	sp|O43504|LTOR5_HUMAN Ragulator complex protein LAMTOR5 OS=Homo sapiens GN=LAMTOR5 PE=1 SV=1
CSTF2	2.19273	2.19212	2.36517	2.64606	2.43387	2.54701	2.13624	2.1651	2.3295	2.12821	2.22409	2.20069	2.18628	2.08561	2.02453	2.13373	2.1917	2.21998	PREDICTED: cleavage stimulation factor subunit 2 isoform X1 [Myotis davidii]<>XP_015423276.1 PREDICTED: cleavage stimulation factor subunit 2 isoform X1 [Myotis davidii];PREDICTED: cleavage stimulation factor subunit 2 isoform X3 [Canis lupus familiaris];PREDICTED: cleavage stimulation factor subunit 2 isoform X2 [Chrysemys picta bellii];PREDICTED: cleavage stimulation factor subunit 2 isoform X2…	GO:0005654;GO:0006378;GO:0098789;GO:0003723;GO:0003729;GO:0000166;GO:0003676;GO:0005847;GO:0031124	nucleoplasm;mRNA polyadenylation;pre-mRNA cleavage required for polyadenylation;RNA binding;mRNA binding;nucleotide binding;nucleic acid binding;mRNA cleavage and polyadenylation specificity factor complex;mRNA 3'-end processing	K14407	CSTF2,RNA15	http://www.genome.jp/dbget-bin/www_bget?ko:K14407	mRNA surveillance pathway	ko03015	KOG0108(A)(mRNA cleavage and polyadenylation factor I complex, subunit RNA15)	gnl|BL_ORD_ID|345140;sp|Q5RDA3|CSTF2_PONAB;sp|P33240|CSTF2_HUMAN	sp|P33240|CSTF2_HUMAN Cleavage stimulation factor subunit 2 OS=Homo sapiens GN=CSTF2 PE=1 SV=1;sp|Q5RDA3|CSTF2_PONAB Cleavage stimulation factor subunit 2 OS=Pongo abelii GN=CSTF2 PE=2 SV=1;sp|P33240|CSTF2_HUMAN Cleavage stimulation factor subunit 2 OS=Homo sapiens GN=CSTF2 PE=1 SV=1
SNRPD3	2.467	2.50814	2.17061	2.28092	1.91228	2.22549	2.17053	2.31035	2.14198	1.90309	1.87286	2.00221	2.067	2.00299	1.80604	1.55799	1.6797	1.69819	PREDICTED: small nuclear ribonucleoprotein Sm D3 isoform X1 [Vicugna pacos]	GO:0005686;GO:0005737;GO:0070062;GO:0005654;GO:0008150;GO:0006396;GO:0071209;GO:0070034;GO:0034709;GO:0071013;GO:0034715;GO:0030529;GO:0005682;GO:0044822;GO:0006479;GO:0071208;GO:0008380;GO:0000243;GO:0003723;GO:0005829;GO:0000245;GO:0000387;GO:0005685;GO:0034719;GO:0005697;GO:0008334;GO:0005681;GO:0006397;GO:0071010;GO:0030620;GO:0005515;GO:0071011;GO:0097526;GO:0000398;GO:0005689;GO:0005683;GO:…	U2 snRNP;cytoplasm;extracellular exosome;nucleoplasm;biological_process;RNA processing;U7 snRNA binding;telomerase RNA binding;methylosome;catalytic step 2 spliceosome;pICln-Sm protein complex;intracellular ribonucleoprotein complex;U5 snRNP;RNA binding;protein methylation;histone pre-mRNA DCP binding;RNA splicing;commitment complex;RNA binding;cytosol;spliceosomal complex assembly;spliceosomal s…	K11088	SNRPD3,SMD3	http://www.genome.jp/dbget-bin/www_bget?ko:K11088	Mitophagy - yeast;Spliceosome	ko04139,ko03040	KOG3172(A)(Small nuclear ribonucleoprotein Sm D3)	gnl|BL_ORD_ID|207618;sp|P62323|SMD3_XENLA	sp|P62323|SMD3_XENLA Small nuclear ribonucleoprotein Sm D3 OS=Xenopus laevis GN=snrpd3 PE=2 SV=1;sp|P62323|SMD3_XENLA Small nuclear ribonucleoprotein Sm D3 OS=Xenopus laevis GN=snrpd3 PE=2 SV=1
EPHX1	1.62788	1.59483	1.50051	1.56585	1.63508	1.59273	1.80848	1.73022	1.76916	1.66455	1.7864	1.61909	1.70001	1.74155	1.88224	1.63428	1.65734	1.74796	PREDICTED: epoxide hydrolase 1 isoform X3 [Pelodiscus sinensis];PREDICTED: epoxide hydrolase 1 isoform X1 [Pelodiscus sinensis];PREDICTED: epoxide hydrolase 1 isoform X2 [Pelodiscus sinensis]	GO:0003824;GO:0033961	catalytic activity;cis-stilbene-oxide hydrolase activity	K01253	EPHX1	http://www.genome.jp/dbget-bin/www_bget?ko:K01253	Metabolism of xenobiotics by cytochrome P450;Bile secretion	ko00980,ko04976	-	gnl|BL_ORD_ID|42273;sp|P04068|HYEP_RABIT;sp|P07099|HYEP_HUMAN	sp|P07099|HYEP_HUMAN Epoxide hydrolase 1 OS=Homo sapiens GN=EPHX1 PE=1 SV=1;sp|P04068|HYEP_RABIT Epoxide hydrolase 1 OS=Oryctolagus cuniculus GN=EPHX1 PE=1 SV=2;sp|P07099|HYEP_HUMAN Epoxide hydrolase 1 OS=Homo sapiens GN=EPHX1 PE=1 SV=1
AKR7A2	2.27439	2.20028	2.07525	2.0569	2.26712	2.19371	2.45734	2.51399	2.48377	2.53226	2.32195	2.44206	2.15691	2.64657	2.40971	2.18693	2.44195	2.43971	PREDICTED: aflatoxin B1 aldehyde reductase member 2 [Pelodiscus sinensis]	GO:0055114;GO:0016491	oxidation-reduction process;oxidoreductase activity	K15303	AKR7	http://www.genome.jp/dbget-bin/www_bget?ko:K15303	Metabolism of xenobiotics by cytochrome P450	ko00980	KOG1575(C)(Voltage-gated shaker-like K+ channel, subunit beta/KCNAB)	gnl|BL_ORD_ID|286030;sp|Q8CG76|ARK72_MOUSE	sp|Q8CG76|ARK72_MOUSE Aflatoxin B1 aldehyde reductase member 2 OS=Mus musculus GN=Akr7a2 PE=1 SV=3;sp|Q8CG76|ARK72_MOUSE Aflatoxin B1 aldehyde reductase member 2 OS=Mus musculus GN=Akr7a2 PE=1 SV=3
PAF1	1.68637	1.52205	1.64385	2.1085	2.07177	2.09332	1.76492	1.8341	1.86451	1.7026	1.80017	1.76827	1.82814	1.88868	1.90806	1.91635	1.58229	1.99167	PREDICTED: LOW QUALITY PROTEIN: RNA polymerase II-associated factor 1 homolog [Pelodiscus sinensis]	-	-	K15174	PAF1	http://www.genome.jp/dbget-bin/www_bget?ko:K15174	MAPK signaling pathway - yeast	ko04011	KOG2478(K)(Putative RNA polymerase II regulator)	sp|Q8N7H5|PAF1_HUMAN;gnl|BL_ORD_ID|431789	sp|Q8N7H5|PAF1_HUMAN RNA polymerase II-associated factor 1 homolog OS=Homo sapiens GN=PAF1 PE=1 SV=2;sp|Q8K2T8|PAF1_MOUSE RNA polymerase II-associated factor 1 homolog OS=Mus musculus GN=Paf1 PE=1 SV=1
LOC102455773	1.9489	1.93344	1.8485	2.19005	1.97447	2.12149	1.77576	1.76641	1.89009	1.73783	2.91015	1.91243	1.67587	1.83935	1.78951	1.8592	1.72378	1.79574	PREDICTED: nucleoside diphosphate kinase, mitochondrial isoform X1 [Chrysemys picta bellii];Nucleoside diphosphate kinase [Chelonia mydas]	GO:0006165;GO:0005622;GO:0005524;GO:0004550;GO:0006228;GO:0016310;GO:0016301;GO:0016740;GO:0006163;GO:0006220;GO:0006183;GO:0000166;GO:0009142;GO:0006241;GO:0042981	nucleoside diphosphate phosphorylation;intracellular;ATP binding;nucleoside diphosphate kinase activity;UTP biosynthetic process;phosphorylation;kinase activity;transferase activity;purine nucleotide metabolic process;pyrimidine nucleotide metabolic process;GTP biosynthetic process;nucleotide binding;nucleoside triphosphate biosynthetic process;CTP biosynthetic process;regulation of apoptotic pro…	K00940	ndk,NME	http://www.genome.jp/dbget-bin/www_bget?ko:K00940	MAPK signaling pathway - plant;Purine metabolism;Pyrimidine metabolism	ko04016,ko00230,ko00240	KOG0888(F)(Nucleoside diphosphate kinase)	sp|O00746|NDKM_HUMAN;gnl|BL_ORD_ID|107718	sp|O00746|NDKM_HUMAN Nucleoside diphosphate kinase, mitochondrial OS=Homo sapiens GN=NME4 PE=1 SV=1;sp|O00746|NDKM_HUMAN Nucleoside diphosphate kinase, mitochondrial OS=Homo sapiens GN=NME4 PE=1 SV=1
NME7	2.4061	2.40776	2.19176	2.3072	2.2513	2.39604	2.18013	2.07726	2.24633	2.05629	2.08293	2.12159	2.50637	2.44699	2.50492	2.501	2.33778	2.34856	PREDICTED: nucleoside diphosphate kinase 7 [Chrysemys picta bellii];PREDICTED: nucleoside diphosphate kinase 7, partial [Pelodiscus sinensis];PREDICTED: nucleoside diphosphate kinase 7 isoform X5 [Pan troglodytes];PREDICTED: nucleoside diphosphate kinase 7 isoform X3 [Apteryx australis mantelli]	GO:0006165;GO:0005622;GO:0006183;GO:0005524;GO:0004550;GO:0000166;GO:0006228;GO:0006241;GO:0005813	nucleoside diphosphate phosphorylation;intracellular;GTP biosynthetic process;ATP binding;nucleoside diphosphate kinase activity;nucleotide binding;UTP biosynthetic process;CTP biosynthetic process;centrosome	K00940	ndk,NME	http://www.genome.jp/dbget-bin/www_bget?ko:K00940	MAPK signaling pathway - plant;Purine metabolism;Pyrimidine metabolism	ko04016,ko00230,ko00240	KOG0888(F)(Nucleoside diphosphate kinase)	sp|Q5E9Y9|NDK7_BOVIN;gnl|BL_ORD_ID|106678;sp|Q9Y5B8|NDK7_HUMAN	sp|Q5E9Y9|NDK7_BOVIN Nucleoside diphosphate kinase 7 OS=Bos taurus GN=NME7 PE=2 SV=1;sp|Q9Y5B8|NDK7_HUMAN Nucleoside diphosphate kinase 7 OS=Homo sapiens GN=NME7 PE=1 SV=1;sp|Q9Y5B8|NDK7_HUMAN Nucleoside diphosphate kinase 7 OS=Homo sapiens GN=NME7 PE=1 SV=1
ECSIT	1.46702	1.48316	1.6097	1.85169	1.6653	1.81178	1.47683	1.47509	1.49485	1.463	1.3784	1.52711	1.5731	1.62232	1.70424	1.60173	1.62665	1.59726	PREDICTED: evolutionarily conserved signaling intermediate in Toll pathway, mitochondrial [Pelodiscus sinensis]	GO:0005737;GO:0005654;GO:0005739;GO:0051341;GO:0055114;GO:0016651;GO:0005634	cytoplasm;nucleoplasm;mitochondrion;regulation of oxidoreductase activity;oxidation-reduction process;oxidoreductase activity, acting on NAD(P)H;nucleus	K04405	ECSIT	http://www.genome.jp/dbget-bin/www_bget?ko:K04405	MAPK signaling pathway	ko04010	KOG3941(T)(Intermediate in Toll signal transduction pathway (ECSIT))	sp|Q0V9C9|ECSIT_XENTR;gnl|BL_ORD_ID|371736;sp|Q08CK1|ECSIT_DANRE	sp|Q0V9C9|ECSIT_XENTR Evolutionarily conserved signaling intermediate in Toll pathway, mitochondrial OS=Xenopus tropicalis GN=ecsit PE=2 SV=1;sp|Q0V9C9|ECSIT_XENTR Evolutionarily conserved signaling intermediate in Toll pathway, mitochondrial OS=Xenopus tropicalis GN=ecsit PE=2 SV=1;sp|Q08CK1|ECSIT_DANRE Evolutionarily conserved signaling intermediate in Toll pathway, mitochondrial OS=Danio rerio…
ASAH1	1.98914	1.96788	2.00022	1.96246	1.97483	2.04442	2.03019	2.09068	2.19769	2.19301	2.18327	2.03419	2.18461	2.427	2.1322	2.06397	2.20262	2.14687	PREDICTED: acid ceramidase [Pelodiscus sinensis];PREDICTED: acid ceramidase [Chrysemys picta bellii]	GO:0005764;GO:0006629	lysosome;lipid metabolic process	K12348	ASAH1	http://www.genome.jp/dbget-bin/www_bget?ko:K12348	Lysosome;Sphingolipid signaling pathway;Sphingolipid metabolism	ko04142,ko04071,ko00600	-	gnl|BL_ORD_ID|298355;sp|Q13510|ASAH1_HUMAN;sp|A5A6P2|ASAH1_PANTR	sp|A5A6P2|ASAH1_PANTR Acid ceramidase OS=Pan troglodytes GN=ASAH1 PE=2 SV=1;sp|Q13510|ASAH1_HUMAN Acid ceramidase OS=Homo sapiens GN=ASAH1 PE=1 SV=5;sp|A5A6P2|ASAH1_PANTR Acid ceramidase OS=Pan troglodytes GN=ASAH1 PE=2 SV=1
ATP6V0C	2.42439	2.42093	2.38662	2.43185	2.38901	2.43441	2.49304	2.46602	2.5271	2.52277	2.45659	2.46193	2.50865	2.59886	2.56219	2.47625	2.48994	2.59649	Putative N-acetylglucosamine-6-phosphate deacetylase [Chelonia mydas]	-	-	K02155	ATPeV0C,ATP6L	http://www.genome.jp/dbget-bin/www_bget?ko:K02155	Lysosome;Phagosome;Oxidative phosphorylation;Collecting duct acid secretion;Synaptic vesicle cycle	ko04142,ko04145,ko00190,ko04966,ko04721	KOG0232(C)(Vacuolar H+-ATPase V0 sector, subunits c/c')	gnl|BL_ORD_ID|243861	sp|P63082|VATL_MOUSE V-type proton ATPase 16 kDa proteolipid subunit OS=Mus musculus GN=Atp6v0c PE=1 SV=1
ATP6AP1	2.10003	1.96666	2.01841	2.47306	2.42215	2.4089	2.18789	2.26895	2.29585	2.36655	2.26487	2.27198	2.31101	2.41184	2.38077	2.32919	2.3709	2.37707	PREDICTED: V-type proton ATPase subunit S1, partial [Pelodiscus sinensis]	-	-	K03662	ATPeVS1,ATP6S1	http://www.genome.jp/dbget-bin/www_bget?ko:K03662	Lysosome;Phagosome;Oxidative phosphorylation	ko04142,ko04145,ko00190	-	gnl|BL_ORD_ID|245763;sp|P40682|VAS1_BOVIN;sp|Q15904|VAS1_HUMAN	sp|P40682|VAS1_BOVIN V-type proton ATPase subunit S1 OS=Bos taurus GN=ATP6AP1 PE=1 SV=1;sp|P40682|VAS1_BOVIN V-type proton ATPase subunit S1 OS=Bos taurus GN=ATP6AP1 PE=1 SV=1;sp|Q15904|VAS1_HUMAN V-type proton ATPase subunit S1 OS=Homo sapiens GN=ATP6AP1 PE=1 SV=2
LOC102456381	1.07225	1.33102	1.37749	1.0892	1.07882	1.17522	1.33122	1.32077	1.33746	1.5876	1.4685	1.35927	1.87268	2.02272	1.87789	1.7432	2.06423	1.93531	PREDICTED: V-type proton ATPase subunit S1-like isoform X1 [Pelodiscus sinensis]<>XP_006122647.1 PREDICTED: V-type proton ATPase subunit S1-like isoform X1 [Pelodiscus sinensis]<>XP_006122648.1 PREDICTED: V-type proton ATPase subunit S1-like isoform X1 [Pelodiscus sinensis]<>XP_014428869.1 PREDICTED: V-type proton ATPase subunit S1-like isoform X1 [Pelodiscus sinensis]	GO:0033180;GO:0046961;GO:0016021;GO:0016020;GO:0046933;GO:0015991	proton-transporting V-type ATPase, V1 domain;proton-transporting ATPase activity, rotational mechanism;integral component of membrane;membrane;proton-transporting ATP synthase activity, rotational mechanism;ATP hydrolysis coupled proton transport	K03662	ATPeVS1,ATP6S1	http://www.genome.jp/dbget-bin/www_bget?ko:K03662	Lysosome;Phagosome;Oxidative phosphorylation	ko04142,ko04145,ko00190	KOG3868(C)(Vacuolar H+-ATPase V0 sector, accessory subunit S1 (Ac45))	gnl|BL_ORD_ID|241041;sp|Q15904|VAS1_HUMAN	sp|Q15904|VAS1_HUMAN V-type proton ATPase subunit S1 OS=Homo sapiens GN=ATP6AP1 PE=1 SV=2;sp|Q15904|VAS1_HUMAN V-type proton ATPase subunit S1 OS=Homo sapiens GN=ATP6AP1 PE=1 SV=2
GLA	1.62726	1.50637	1.61278	1.64118	1.78276	1.78689	2.02333	1.85309	1.81458	1.89564	1.82406	1.98191	1.7775	2.22645	2.20311	1.75891	1.76649	1.88383	PREDICTED: alpha-galactosidase A [Pelodiscus sinensis]	-	-	K01189	GLA	http://www.genome.jp/dbget-bin/www_bget?ko:K01189	Lysosome;Galactose metabolism;Glycosphingolipid biosynthesis - globo and isoglobo series;Glycerolipid metabolism;Sphingolipid metabolism	ko04142,ko00052,ko00603,ko00561,ko00600	KOG2366(G)(Alpha-D-galactosidase (melibiase))	sp|P06280|AGAL_HUMAN;gnl|BL_ORD_ID|270866	sp|P06280|AGAL_HUMAN Alpha-galactosidase A OS=Homo sapiens GN=GLA PE=1 SV=1;sp|P06280|AGAL_HUMAN Alpha-galactosidase A OS=Homo sapiens GN=GLA PE=1 SV=1
LOC102451819	2.07258	2.00471	1.89042	1.89003	2.00514	1.97626	2.30285	2.2849	2.25157	2.37379	2.23955	2.32331	2.13427	2.23737	2.25669	2.18839	2.10951	2.17003	PREDICTED: LOW QUALITY PROTEIN: proactivator polypeptide-like [Pelodiscus sinensis]	-	-	K12382	PSAP,SGP1	http://www.genome.jp/dbget-bin/www_bget?ko:K12382	Lysosome	ko04142	-	gnl|BL_ORD_ID|200122;sp|O13035|SAP_CHICK	sp|O13035|SAP_CHICK Prosaposin OS=Gallus gallus GN=PSAP PE=1 SV=1;sp|O13035|SAP_CHICK Prosaposin OS=Gallus gallus GN=PSAP PE=1 SV=1
LOC102453799	1.48401	1.47334	1.2235	1.90053	1.8262	1.75082	1.45484	1.42651	1.39305	1.34674	1.49665	1.28081	1.56984	1.2572	1.26881	1.70312	1.84136	1.27875	PREDICTED: ciliogenesis-associated TTC17-interacting protein [Chrysemys picta bellii];PREDICTED: natural resistance-associated macrophage protein 1 [Pelodiscus sinensis];PREDICTED: uncharacterized protein C2orf62 homolog [Chelonia mydas]	GO:0005737;GO:0030041;GO:0044782;GO:0005886;GO:0005856;GO:0016020;GO:0030030;GO:0015629;GO:0005634	cytoplasm;actin filament polymerization;cilium organization;plasma membrane;cytoskeleton;membrane;cell projection organization;actin cytoskeleton;nucleus	K12347	SLC11A,NRAMP	http://www.genome.jp/dbget-bin/www_bget?ko:K12347	Lysosome	ko04142	KOG1291(P)(Mn2+ and Fe2+ transporters of the NRAMP family)	sp|P51027|NRAM1_CHICK;sp|Q0IHI3|CATIP_XENLA;gnl|BL_ORD_ID|116714	sp|P51027|NRAM1_CHICK Natural resistance-associated macrophage protein 1 OS=Gallus gallus GN=SLC11A1 PE=2 SV=1;sp|Q0IHI3|CATIP_XENLA Ciliogenesis-associated TTC17-interacting protein OS=Xenopus laevis GN=catip PE=2 SV=1;sp|P51027|NRAM1_CHICK Natural resistance-associated macrophage protein 1 OS=Gallus gallus GN=SLC11A1 PE=2 SV=1
LOC102453964	1.71231	1.64345	1.73231	1.77988	1.86112	1.88818	1.73006	1.79913	1.79906	1.70079	1.60477	1.53706	2.08853	2.12001	2.13232	2.03165	2.00134	2.09705	PREDICTED: uncharacterized protein LOC102453964 [Pelodiscus sinensis];PREDICTED: major facilitator superfamily domain-containing protein 8-like [Chrysemys picta bellii];Thrombopoietin [Chelonia mydas]	GO:0016021;GO:0055085;GO:0016020	integral component of membrane;transmembrane transport;membrane	K12307	MSFD8,CLN7	http://www.genome.jp/dbget-bin/www_bget?ko:K12307	Lysosome	ko04142	-	-	-
LOC102458918	1.67514	1.83289	1.63829	1.57124	1.68187	1.46598	1.87268	1.8819	1.79057	1.902	1.88133	1.80936	1.77801	2.02804	1.75043	1.97049	1.94812	1.89603	PREDICTED: sialomucin core protein 24, partial [Buceros rhinoceros silvestris]	GO:0016021;GO:0016020	integral component of membrane;membrane	K06546	CD164,MGC24	http://www.genome.jp/dbget-bin/www_bget?ko:K06546	Lysosome	ko04142	-	gnl|BL_ORD_ID|408128;sp|Q9R0L9|MUC24_MOUSE	sp|Q9R0L9|MUC24_MOUSE Sialomucin core protein 24 OS=Mus musculus GN=Cd164 PE=1 SV=1;sp|Q9R0L9|MUC24_MOUSE Sialomucin core protein 24 OS=Mus musculus GN=Cd164 PE=1 SV=1
NPC2	1.57066	1.53491	1.57101	1.65495	1.73239	1.83448	1.84702	1.70995	1.85721	1.84186	1.81458	1.70389	1.77757	1.99401	1.95626	1.81325	1.82517	1.90891	PREDICTED: epididymal secretory protein E1 [Pelodiscus sinensis]	GO:0070062;GO:0030301;GO:0033344;GO:0005764;GO:0032367;GO:0009615;GO:0032366;GO:0015485;GO:0042632;GO:0019899	extracellular exosome;cholesterol transport;cholesterol efflux;lysosome;intracellular cholesterol transport;response to virus;intracellular sterol transport;cholesterol binding;cholesterol homeostasis;enzyme binding	K13443	NPC2	http://www.genome.jp/dbget-bin/www_bget?ko:K13443	Lysosome	ko04142	-	gnl|BL_ORD_ID|417924;sp|P61917|NPC2_PANTR	sp|P61917|NPC2_PANTR Epididymal secretory protein E1 OS=Pan troglodytes GN=NPC2 PE=2 SV=1;sp|P61917|NPC2_PANTR Epididymal secretory protein E1 OS=Pan troglodytes GN=NPC2 PE=2 SV=1
ECHS1	2.68168	2.51737	2.62912	2.49916	2.53221	2.74887	2.4463	2.61305	2.65276	2.50938	2.58245	2.47392	2.78573	2.99346	3.02583	2.91454	2.86667	2.89698	PREDICTED: LOW QUALITY PROTEIN: enoyl-CoA hydratase, mitochondrial, partial [Pelodiscus sinensis]	-	-	K07511	ECHS1	http://www.genome.jp/dbget-bin/www_bget?ko:K07511	Lysine degradation;Tryptophan metabolism;Valine, leucine and isoleucine degradation;Butanoate metabolism;Propanoate metabolism;Fatty acid degradation;Fatty acid elongation;beta-Alanine metabolism;Carbon metabolism;Fatty acid metabolism;Aminobenzoate degradation;Caprolactam degradation	ko00310,ko00380,ko00280,ko00650,ko00640,ko00071,ko00062,ko00410,ko01200,ko01212,ko00627,ko00930	KOG1679(I)(Enoyl-CoA hydratase)	gnl|BL_ORD_ID|378038;sp|Q58DM8|ECHM_BOVIN	sp|Q58DM8|ECHM_BOVIN Enoyl-CoA hydratase, mitochondrial OS=Bos taurus GN=ECHS1 PE=2 SV=1;sp|Q58DM8|ECHM_BOVIN Enoyl-CoA hydratase, mitochondrial OS=Bos taurus GN=ECHS1 PE=2 SV=1
HADH	2.39016	2.50169	2.29405	2.22557	2.38475	2.34431	2.47503	2.51351	2.3981	2.28673	2.32791	2.38303	2.34408	2.52398	2.81517	2.34524	2.6869	2.53957	PREDICTED: cytochrome P450 2U1 [Pelodiscus sinensis];PREDICTED: hydroxyacyl-coenzyme A dehydrogenase, mitochondrial [Pelodiscus sinensis]	GO:0005737;GO:0005654;GO:0005743;GO:0004497;GO:0005506;GO:0016705;GO:0005739;GO:0016021;GO:0003857;GO:0016020;GO:0070403;GO:0008395;GO:0055114;GO:0016491;GO:0020037;GO:0006631;GO:0046872;GO:0016712	cytoplasm;nucleoplasm;mitochondrial inner membrane;monooxygenase activity;iron ion binding;oxidoreductase activity, acting on paired donors, with incorporation or reduction of molecular oxygen;mitochondrion;integral component of membrane;3-hydroxyacyl-CoA dehydrogenase activity;membrane;NAD+ binding;steroid hydroxylase activity;oxidation-reduction process;oxidoreductase activity;heme binding;fatt…	K07422;K00022	CYP2U1;HADH	http://www.genome.jp/dbget-bin/www_bget?ko:K07422;http://www.genome.jp/dbget-bin/www_bget?ko:K00022	Lysine degradation;Tryptophan metabolism;Valine, leucine and isoleucine degradation;Butanoate metabolism;Fatty acid degradation;Fatty acid elongation;Geraniol degradation;Fatty acid metabolism;Caprolactam degradation;Arachidonic acid metabolism	ko00310,ko00380,ko00280,ko00650,ko00071,ko00062,ko00281,ko01212,ko00930,ko00590	KOG2304(I)(3-hydroxyacyl-CoA dehydrogenase);KOG0156(Q)(Cytochrome P450 CYP2 subfamily);KOG1683(I)(Hydroxyacyl-CoA dehydrogenase/enoyl-CoA hydratase)	sp|Q7Z449|CP2U1_HUMAN;sp|Q9WVK7|HCDH_RAT;sp|Q61425|HCDH_MOUSE;gnl|BL_ORD_ID|35739	sp|Q7Z449|CP2U1_HUMAN Cytochrome P450 2U1 OS=Homo sapiens GN=CYP2U1 PE=1 SV=1;sp|Q9WVK7|HCDH_RAT Hydroxyacyl-coenzyme A dehydrogenase, mitochondrial OS=Rattus norvegicus GN=Hadh PE=2 SV=1;sp|Q61425|HCDH_MOUSE Hydroxyacyl-coenzyme A dehydrogenase, mitochondrial OS=Mus musculus GN=Hadh PE=1 SV=2;sp|Q9WVK7|HCDH_RAT Hydroxyacyl-coenzyme A dehydrogenase, mitochondrial OS=Rattus norvegicus GN=Hadh PE=2…
OGDH	2.08785	2.05388	2.07719	2.55443	2.4041	2.48937	2.14408	2.10113	2.17181	2.09726	2.18741	2.12911	2.07922	2.07987	2.24055	2.21746	2.04179	2.22347	PREDICTED: 2-oxoglutarate dehydrogenase, mitochondrial isoform X2 [Pelodiscus sinensis];PREDICTED: 2-oxoglutarate dehydrogenase, mitochondrial isoform X4 [Pelodiscus sinensis];PREDICTED: 2-oxoglutarate dehydrogenase, mitochondrial isoform X3 [Pelodiscus sinensis];PREDICTED: 2-oxoglutarate dehydrogenase, mitochondrial isoform X5 [Pelodiscus sinensis]	GO:0021766;GO:0008152;GO:0016624;GO:0005739;GO:0061034;GO:0045252;GO:0021695;GO:0021794;GO:0004591;GO:0006099;GO:0005829;GO:0022028;GO:0055114;GO:0021860;GO:0034602;GO:0030976;GO:0021756	hippocampus development;metabolic process;oxidoreductase activity, acting on the aldehyde or oxo group of donors, disulfide as acceptor;mitochondrion;olfactory bulb mitral cell layer development;oxoglutarate dehydrogenase complex;cerebellar cortex development;thalamus development;oxoglutarate dehydrogenase (succinyl-transferring) activity;tricarboxylic acid cycle;cytosol;tangential migration from…	K00164	OGDH,sucA	http://www.genome.jp/dbget-bin/www_bget?ko:K00164	Lysine degradation;Tryptophan metabolism;Citrate cycle (TCA cycle);Carbon metabolism	ko00310,ko00380,ko00020,ko01200	KOG0450(G)(2-oxoglutarate dehydrogenase, E1 subunit)	gnl|BL_ORD_ID|425268;sp|Q6P6Z8|ODO1_XENLA;gnl|BL_ORD_ID|426391;sp|Q60597|ODO1_MOUSE	sp|Q02218|ODO1_HUMAN 2-oxoglutarate dehydrogenase, mitochondrial OS=Homo sapiens GN=OGDH PE=1 SV=3;sp|Q6P6Z8|ODO1_XENLA 2-oxoglutarate dehydrogenase, mitochondrial OS=Xenopus laevis GN=ogdh PE=2 SV=1;sp|Q6P6Z8|ODO1_XENLA 2-oxoglutarate dehydrogenase, mitochondrial OS=Xenopus laevis GN=ogdh PE=2 SV=1;sp|Q60597|ODO1_MOUSE 2-oxoglutarate dehydrogenase, mitochondrial OS=Mus musculus GN=Ogdh PE=1 SV=3
PLOD3	1.42537	1.23426	1.38489	1.93288	1.9805	1.91286	1.88326	1.83998	1.84348	1.91524	1.98245	1.94394	1.68547	1.64177	1.6218	1.72689	1.7839	1.64098	PREDICTED: procollagen-lysine,2-oxoglutarate 5-dioxygenase 3, partial [Pelodiscus sinensis]	GO:0030199;GO:0070062;GO:0033823;GO:0008104;GO:0005506;GO:0070831;GO:0016705;GO:0051213;GO:0005581;GO:0055114;GO:0016491;GO:0008475;GO:0005783;GO:0060425;GO:0048730;GO:0021915;GO:0031418;GO:0042311;GO:0001886	collagen fibril organization;extracellular exosome;procollagen glucosyltransferase activity;protein localization;iron ion binding;basement membrane assembly;oxidoreductase activity, acting on paired donors, with incorporation or reduction of molecular oxygen;dioxygenase activity;collagen trimer;oxidation-reduction process;oxidoreductase activity;procollagen-lysine 5-dioxygenase activity;endoplasm…	K13646	PLOD3	http://www.genome.jp/dbget-bin/www_bget?ko:K13646	Lysine degradation;Other types of O-glycan biosynthesis	ko00310,ko00514	-	gnl|BL_ORD_ID|133134;sp|Q5U367|PLOD3_RAT;sp|O60568|PLOD3_HUMAN	sp|Q5U367|PLOD3_RAT Procollagen-lysine,2-oxoglutarate 5-dioxygenase 3 OS=Rattus norvegicus GN=Plod3 PE=2 SV=1;sp|Q5U367|PLOD3_RAT Procollagen-lysine,2-oxoglutarate 5-dioxygenase 3 OS=Rattus norvegicus GN=Plod3 PE=2 SV=1;sp|O60568|PLOD3_HUMAN Procollagen-lysine,2-oxoglutarate 5-dioxygenase 3 OS=Homo sapiens GN=PLOD3 PE=1 SV=1
EZH1	1.47041	1.38075	1.57576	1.94116	1.80216	1.87789	1.44404	1.38112	1.56961	1.32879	1.50623	1.38364	1.67916	1.53364	1.75603	1.73512	1.74218	1.86297	PREDICTED: LOW QUALITY PROTEIN: histone-lysine N-methyltransferase EZH1 [Pelodiscus sinensis]	GO:0005654;GO:0035098;GO:0018024;GO:0070734	nucleoplasm;ESC/E(Z) complex;histone-lysine N-methyltransferase activity;histone H3-K27 methylation	K17451	EZH1	http://www.genome.jp/dbget-bin/www_bget?ko:K17451	Lysine degradation	ko00310	KOG1080(BK)(Histone H3 (Lys4) methyltransferase complex, subunit SET1 and related methyltransferases)	gnl|BL_ORD_ID|383736;sp|Q92800|EZH1_HUMAN;sp|A7E2Z2|EZH1_BOVIN	sp|A7E2Z2|EZH1_BOVIN Histone-lysine N-methyltransferase EZH1 OS=Bos taurus GN=EZH1 PE=2 SV=2;sp|Q92800|EZH1_HUMAN Histone-lysine N-methyltransferase EZH1 OS=Homo sapiens GN=EZH1 PE=1 SV=2;sp|A7E2Z2|EZH1_BOVIN Histone-lysine N-methyltransferase EZH1 OS=Bos taurus GN=EZH1 PE=2 SV=2
LOC102461475	1.79309	1.76042	1.86817	2.18096	2.07936	2.13152	1.77735	1.67879	1.79414	1.75351	1.81131	1.83847	1.80936	1.74772	1.85902	1.87944	1.8893	1.90477	PREDICTED: histone-lysine N-methyltransferase, H3 lysine-36 and H4 lysine-20 specific isoform X1 [Chrysemys picta bellii];PREDICTED: LOW QUALITY PROTEIN: histone-lysine N-methyltransferase, H3 lysine-36 and H4 lysine-20 specific [Pelodiscus sinensis]	-	-	K15588	NSD1	http://www.genome.jp/dbget-bin/www_bget?ko:K15588	Lysine degradation	ko00310	KOG1081(K)(Transcription factor NSD1 and related SET domain proteins)	sp|O88491|NSD1_MOUSE;sp|Q96L73|NSD1_HUMAN;gnl|BL_ORD_ID|112706	sp|O88491|NSD1_MOUSE Histone-lysine N-methyltransferase, H3 lysine-36 and H4 lysine-20 specific OS=Mus musculus GN=Nsd1 PE=1 SV=1;sp|Q96L73|NSD1_HUMAN Histone-lysine N-methyltransferase, H3 lysine-36 and H4 lysine-20 specific OS=Homo sapiens GN=NSD1 PE=1 SV=1;sp|Q96L73|NSD1_HUMAN Histone-lysine N-methyltransferase, H3 lysine-36 and H4 lysine-20 specific OS=Homo sapiens GN=NSD1 PE=1 SV=1
RNASEK	1.84547	2.01603	1.94121	1.98484	1.8936	1.90108	2.03362	1.99695	2.01439	2.05304	2.02263	1.95124	2.30198	2.35172	2.32976	2.2819	2.33169	2.27128	PREDICTED: ribonuclease kappa [Pelodiscus sinensis]	GO:0004521;GO:0016021;GO:0009303;GO:0005575;GO:0090502	endoribonuclease activity;integral component of membrane;rRNA transcription;cellular_component;RNA phosphodiester bond hydrolysis, endonucleolytic	K19770	RNASEK	http://www.genome.jp/dbget-bin/www_bget?ko:K19770	Longevity regulating pathway - worm	ko04212	-	gnl|BL_ORD_ID|177717;sp|Q8K3C0|RNK_MOUSE	sp|Q8K3C0|RNK_MOUSE Ribonuclease kappa OS=Mus musculus GN=Rnasek PE=3 SV=1;sp|Q8K3C0|RNK_MOUSE Ribonuclease kappa OS=Mus musculus GN=Rnasek PE=3 SV=1
LIAS	1.82191	1.97483	1.95482	1.80706	1.76827	1.89215	1.8836	1.7767	1.85631	1.82295	1.79824	1.78369	1.88801	1.97197	2.02567	1.81371	1.93003	1.95727	PREDICTED: lipoyl synthase, mitochondrial, partial [Pelodiscus sinensis]	-	-	K03644	lipA	http://www.genome.jp/dbget-bin/www_bget?ko:K03644	Lipoic acid metabolism	ko00785	KOG2672(H)(Lipoate synthase)	sp|Q5BIP7|LIAS_BOVIN;sp|O43766|LIAS_HUMAN;gnl|BL_ORD_ID|405450	sp|Q5BIP7|LIAS_BOVIN Lipoyl synthase, mitochondrial OS=Bos taurus GN=LIAS PE=2 SV=1;sp|O43766|LIAS_HUMAN Lipoyl synthase, mitochondrial OS=Homo sapiens GN=LIAS PE=1 SV=3;sp|O43766|LIAS_HUMAN Lipoyl synthase, mitochondrial OS=Homo sapiens GN=LIAS PE=1 SV=3
THY1	1.62747	1.22866	1.35199	1.89845	1.96708	2.03056	1.82575	1.82471	1.88156	1.82672	1.89752	1.81928	1.65581	1.67357	1.78554	1.73352	1.60681	1.54283	PREDICTED: thy-1 membrane glycoprotein [Pelodiscus sinensis]	GO:0030425;GO:0005783;GO:0016324;GO:0009897;GO:0019901;GO:0050860;GO:0030426;GO:0005178;GO:0005623;GO:0070062;GO:0016337;GO:0005925;GO:0001525;GO:0043209;GO:0007155;GO:0045121;GO:0050771;GO:0007010;GO:0043547;GO:0030334;GO:0005886;GO:0048041;GO:0031362;GO:0050852;GO:0051281;GO:0030336;GO:0050870;GO:0034235;GO:0006469;GO:0046549;GO:0005096	dendrite;endoplasmic reticulum;apical plasma membrane;external side of plasma membrane;protein kinase binding;negative regulation of T cell receptor signaling pathway;growth cone;integrin binding;cell;extracellular exosome;single organismal cell-cell adhesion;focal adhesion;angiogenesis;myelin sheath;cell adhesion;membrane raft;negative regulation of axonogenesis;cytoskeleton organization;positiv…	K06514	THY1,CD90	http://www.genome.jp/dbget-bin/www_bget?ko:K06514	Leukocyte transendothelial migration	ko04670	-	gnl|BL_ORD_ID|215659;sp|Q07212|THY1_CHICK	sp|Q07212|THY1_CHICK Thy-1 membrane glycoprotein OS=Gallus gallus GN=THY1 PE=1 SV=1;sp|Q07212|THY1_CHICK Thy-1 membrane glycoprotein OS=Gallus gallus GN=THY1 PE=1 SV=1
CTF1	1.81017	1.66736	1.80632	1.99449	1.99361	2.14289	1.93369	1.79372	2.11988	2.09909	1.98209	1.84454	2.24343	2.49407	2.1817	2.21354	2.0545	2.21463	PREDICTED: cardiotrophin-1 [Pelodiscus sinensis]	-	-	K05422	CTF1,CT1	http://www.genome.jp/dbget-bin/www_bget?ko:K05422	Jak-STAT signaling pathway;Cytokine-cytokine receptor interaction	ko04630,ko04060	-	gnl|BL_ORD_ID|339536	sp|Q16619|CTF1_HUMAN Cardiotrophin-1 OS=Homo sapiens GN=CTF1 PE=1 SV=1
LOC102444244	1.17202	0.91169	1.26435	1.61098	1.89321	2.04583	1.46997	1.45939	1.58433	1.16584	1.41162	1.38346	1.70217	1.63306	1.93404	1.91323	1.78262	1.56182	PREDICTED: small conductance calcium-activated potassium channel protein 1-like [Pelodiscus sinensis]	-	-	K04942	KCNN1	http://www.genome.jp/dbget-bin/www_bget?ko:K04942	Insulin secretion	ko04911	KOG3684(P)(Ca2+-activated K+ channel proteins (intermediate/small conductance classes))	sp|Q8N4S9|MALD2_HUMAN;gnl|BL_ORD_ID|69657	sp|Q8N4S9|MALD2_HUMAN MARVEL domain-containing protein 2 OS=Homo sapiens GN=MARVELD2 PE=1 SV=2;sp|Q9H2S1|KCNN2_HUMAN Small conductance calcium-activated potassium channel protein 2 OS=Homo sapiens GN=KCNN2 PE=1 SV=2
RAD51D	1.53769	1.68511	1.98869	2.26309	2.19692	2.21783	1.63538	1.56431	1.71825	1.43233	1.70808	1.50813	2.0136	1.82988	1.83677	2.14974	2.03286	1.93576	PREDICTED: E3 ubiquitin-protein ligase rififylin isoform X1 [Pelodiscus sinensis];PREDICTED: DNA repair protein RAD51 homolog 4 isoform X1 [Pelodiscus sinensis]<>XP_014427257.1 PREDICTED: DNA repair protein RAD51 homolog 4 isoform X1 [Pelodiscus sinensis]<>XP_014427258.1 PREDICTED: DNA repair protein RAD51 homolog 4 isoform X1 [Pelodiscus sinensis]<>XP_014427259.1 PREDICTED: DNA repair protein RA…	GO:0031625;GO:0005737;GO:0006289;GO:0005654;GO:0008094;GO:2001271;GO:0010008;GO:0003677;GO:0005524;GO:0002947;GO:0005886;GO:0010804;GO:0019901;GO:0061630;GO:1901797;GO:0042787;GO:1902042;GO:0036297;GO:0006974;GO:0051276;GO:0043161;GO:0000723;GO:0016020;GO:0000781;GO:0042148;GO:0051726;GO:0000400;GO:0006511;GO:0000166;GO:0000784;GO:0043015;GO:0003697;GO:0033063;GO:0000724;GO:0005657;GO:0070936;GO:…	ubiquitin protein ligase binding;cytoplasm;nucleotide-excision repair;nucleoplasm;DNA-dependent ATPase activity;negative regulation of cysteine-type endopeptidase activity involved in execution phase of apoptosis;endosome membrane;DNA binding;ATP binding;tumor necrosis factor receptor superfamily complex;plasma membrane;negative regulation of tumor necrosis factor-mediated signaling pathway;prote…	K10871	RAD51L3,RAD51D	http://www.genome.jp/dbget-bin/www_bget?ko:K10871	Homologous recombination	ko03440	KOG1433(L)(DNA repair protein RAD51/RHP55);KOG1434(DL)(Meiotic recombination protein Dmc1);KOG4275(O)(Predicted E3 ubiquitin ligase)	sp|Q8WZ73|RFFL_HUMAN;sp|O75771|RA51D_HUMAN;gnl|BL_ORD_ID|152487;gnl|BL_ORD_ID|156282;sp|O55230|RA51D_MOUSE	sp|Q8WZ73|RFFL_HUMAN E3 ubiquitin-protein ligase rififylin OS=Homo sapiens GN=RFFL PE=1 SV=1;sp|O75771|RA51D_HUMAN DNA repair protein RAD51 homolog 4 OS=Homo sapiens GN=RAD51D PE=1 SV=1;sp|O55230|RA51D_MOUSE DNA repair protein RAD51 homolog 4 OS=Mus musculus GN=Rad51d PE=1 SV=1;sp|O75771|RA51D_HUMAN DNA repair protein RAD51 homolog 4 OS=Homo sapiens GN=RAD51D PE=1 SV=1;sp|O55230|RA51D_MOUSE DNA r…
RASSF6	1.65658	1.88784	1.62593	1.42193	1.31069	1.6668	1.90897	1.82905	1.85034	1.95265	1.92059	1.77393	1.81265	2.01208	1.98936	2.06172	1.88383	1.99251	PREDICTED: ras association domain-containing protein 6 [Pelodiscus sinensis]<>XP_014430244.1 PREDICTED: ras association domain-containing protein 6 [Pelodiscus sinensis]	GO:0007165	signal transduction	K09854	RASSF6	http://www.genome.jp/dbget-bin/www_bget?ko:K09854	Hippo signaling pathway;Hippo signaling pathway - multiple species	ko04390,ko04392	-	gnl|BL_ORD_ID|157799;sp|Q6ZTQ3|RASF6_HUMAN	sp|Q6ZTQ3|RASF6_HUMAN Ras association domain-containing protein 6 OS=Homo sapiens GN=RASSF6 PE=1 SV=1;sp|Q6ZTQ3|RASF6_HUMAN Ras association domain-containing protein 6 OS=Homo sapiens GN=RASSF6 PE=1 SV=1
ENO1	2.68875	2.77572	2.55853	2.5506	2.6065	2.5586	2.68698	2.73714	2.74996	2.85168	2.9588	2.76211	2.66848	2.97022	2.91729	2.84805	2.9391	2.78787	PREDICTED: alpha-enolase isoform X1 [Pelodiscus sinensis];PREDICTED: alpha-enolase isoform X2 [Pelodiscus sinensis]	GO:0006096;GO:0005737;GO:0070062;GO:0006094;GO:0051020;GO:0051099;GO:0000287;GO:0019897;GO:0045892;GO:0044822;GO:0003723;GO:0046982;GO:0005829;GO:0016020;GO:0043209;GO:0030308;GO:0000015;GO:0009615;GO:0005615;GO:0004634;GO:0005634	glycolytic process;cytoplasm;extracellular exosome;gluconeogenesis;GTPase binding;positive regulation of binding;magnesium ion binding;extrinsic component of plasma membrane;negative regulation of transcription, DNA-templated;RNA binding;RNA binding;protein heterodimerization activity;cytosol;membrane;myelin sheath;negative regulation of cell growth;phosphopyruvate hydratase complex;response to v…	K01689	ENO,eno	http://www.genome.jp/dbget-bin/www_bget?ko:K01689	HIF-1 signaling pathway;RNA degradation;Glycolysis / Gluconeogenesis;Methane metabolism;Biosynthesis of amino acids;Carbon metabolism	ko04066,ko03018,ko00010,ko00680,ko01230,ko01200	KOG2670(G)(Enolase)	gnl|BL_ORD_ID|375172;sp|Q9W7L1|ENOA_TRASE	sp|Q9W7L1|ENOA_TRASE Alpha-enolase OS=Trachemys scripta elegans PE=2 SV=3;sp|Q9W7L1|ENOA_TRASE Alpha-enolase OS=Trachemys scripta elegans PE=2 SV=3
CD9	1.89326	1.87262	1.99682	1.9734	1.91291	1.99699	2.17181	2.12251	2.12123	2.21216	2.15146	2.09889	2.41434	2.52955	2.42415	2.42029	2.2039	2.3748	CD9 antigen [Pelodiscus sinensis]<>ADB93365.1 CD9 [Pelodiscus sinensis]	GO:0016021;GO:0016020	integral component of membrane;membrane	K06460	CD9,TSPAN29	http://www.genome.jp/dbget-bin/www_bget?ko:K06460	Hematopoietic cell lineage	ko04640	KOG3882(R)(Tetraspanin family integral membrane protein)	sp|P21926|CD9_HUMAN;gnl|BL_ORD_ID|326548;sp|Q8WMQ3|CD9_PIG	sp|P21926|CD9_HUMAN CD9 antigen OS=Homo sapiens GN=CD9 PE=1 SV=4;sp|P21926|CD9_HUMAN CD9 antigen OS=Homo sapiens GN=CD9 PE=1 SV=4;sp|Q8WMQ3|CD9_PIG CD9 antigen OS=Sus scrofa GN=CD9 PE=2 SV=3
LOC102452745	1.50393	1.78902	1.7676	1.44012	1.41313	1.36605	1.48601	1.61584	1.79323	1.991	1.7611	1.61721	2.28391	2.09156	2.11049	2.33528	2.26145	2.13808	PREDICTED: signal transducer CD24 [Aquila chrysaetos canadensis]	-	-	K06469	CD24	http://www.genome.jp/dbget-bin/www_bget?ko:K06469	Hematopoietic cell lineage	ko04640	-	-	-
LOC102445016	1.85691	1.9309	1.87489	1.36977	1.53895	1.64434	2.16711	2.01452	2.04317	2.1469	1.98749	2.00039	1.58749	2.26029	2.20104	1.80393	1.70372	2.11926	PREDICTED: low-density lipoprotein receptor-related protein 2-like [Pelodiscus sinensis]	-	-	K06233	LRP2	http://www.genome.jp/dbget-bin/www_bget?ko:K06233	Hedgehog signaling pathway;Thyroid hormone synthesis	ko04340,ko04918	KOG1215(T)(Low-density lipoprotein receptors containing Ca2+-binding EGF-like domains)	sp|A2ARV4|LRP2_MOUSE;gnl|BL_ORD_ID|77719;sp|P98164|LRP2_HUMAN;sp|P98158|LRP2_RAT	sp|A2ARV4|LRP2_MOUSE Low-density lipoprotein receptor-related protein 2 OS=Mus musculus GN=Lrp2 PE=1 SV=1;sp|P98164|LRP2_HUMAN Low-density lipoprotein receptor-related protein 2 OS=Homo sapiens GN=LRP2 PE=1 SV=3;sp|P98164|LRP2_HUMAN Low-density lipoprotein receptor-related protein 2 OS=Homo sapiens GN=LRP2 PE=1 SV=3;sp|P98158|LRP2_RAT Low-density lipoprotein receptor-related protein 2 OS=Rattus n…
LRP2	2.22719	2.36419	2.12202	1.89332	2.08867	2.1502	2.19689	2.14628	2.32336	2.23817	2.11428	2.12437	2.19692	2.50573	2.61412	2.20499	2.294	2.43305	PREDICTED: LOW QUALITY PROTEIN: low-density lipoprotein receptor-related protein 2 [Chelonia mydas];PREDICTED: low-density lipoprotein receptor-related protein 2 isoform X1 [Pelodiscus sinensis]	GO:0016021;GO:0016020	integral component of membrane;membrane	K06233	LRP2	http://www.genome.jp/dbget-bin/www_bget?ko:K06233	Hedgehog signaling pathway;Thyroid hormone synthesis	ko04340,ko04918	KOG1215(T)(Low-density lipoprotein receptors containing Ca2+-binding EGF-like domains)	gnl|BL_ORD_ID|77719;sp|P98164|LRP2_HUMAN	sp|P98164|LRP2_HUMAN Low-density lipoprotein receptor-related protein 2 OS=Homo sapiens GN=LRP2 PE=1 SV=3;sp|P98164|LRP2_HUMAN Low-density lipoprotein receptor-related protein 2 OS=Homo sapiens GN=LRP2 PE=1 SV=3
LOC102452543	1.56984	1.41128	1.60477	1.69923	1.68878	1.49734	1.53567	1.49651	1.7834	1.56949	1.53415	1.51825	1.97474	1.78355	1.81531	1.82937	1.79865	1.79824	PREDICTED: LOW QUALITY PROTEIN: glycosylphosphatidylinositol anchor attachment 1 protein-like, partial [Pelodiscus sinensis]	GO:0016021;GO:0016020;GO:0034235;GO:0042765	integral component of membrane;membrane;GPI anchor binding;GPI-anchor transamidase complex	K05289	GAA1	http://www.genome.jp/dbget-bin/www_bget?ko:K05289	Glycosylphosphatidylinositol(GPI)-anchor biosynthesis	ko00563	-	sp|Q9WTK3|GPAA1_MOUSE;gnl|BL_ORD_ID|21798	sp|Q9WTK3|GPAA1_MOUSE Glycosylphosphatidylinositol anchor attachment 1 protein OS=Mus musculus GN=Gpaa1 PE=1 SV=3;sp|Q9WTK3|GPAA1_MOUSE Glycosylphosphatidylinositol anchor attachment 1 protein OS=Mus musculus GN=Gpaa1 PE=1 SV=3
LOC102450039	1.73632	1.52917	1.63155	2.08962	2.08682	2.01657	1.90687	1.87227	1.88389	1.93003	1.95866	1.87221	2.12827	1.90977	2.06405	2.25681	1.98731	2.05789	PREDICTED: beta-1,4-galactosyltransferase 3-like [Pelodiscus sinensis]	GO:0005975;GO:0016757	carbohydrate metabolic process;transferase activity, transferring glycosyl groups	K07968	B4GALT3	http://www.genome.jp/dbget-bin/www_bget?ko:K07968	Glycosaminoglycan biosynthesis - keratan sulfate;Glycosphingolipid biosynthesis - lacto and neolacto series;Mannose type O-glycan biosyntheis;N-Glycan biosynthesis;Other types of O-glycan biosynthesis;Various types of N-glycan biosynthesis	ko00533,ko00601,ko00515,ko00510,ko00514,ko00513	KOG3916(G)(UDP-Gal:glucosylceramide beta-1,4-galactosyltransferase)	sp|Q5NVN3|B4GT3_PONAB;sp|O60512|B4GT3_HUMAN;gnl|BL_ORD_ID|301299	sp|Q5NVN3|B4GT3_PONAB Beta-1,4-galactosyltransferase 3 OS=Pongo abelii GN=B4GALT3 PE=2 SV=1;sp|O60512|B4GT3_HUMAN Beta-1,4-galactosyltransferase 3 OS=Homo sapiens GN=B4GALT3 PE=1 SV=2;sp|Q5NVN3|B4GT3_PONAB Beta-1,4-galactosyltransferase 3 OS=Pongo abelii GN=B4GALT3 PE=2 SV=1
LOC102450327	1.83033	1.82471	1.71088	1.80693	2.00591	2.01762	1.69975	1.70509	1.96042	1.79831	1.98046	1.76433	1.86231	2.1745	2.34506	2.20577	2.13682	2.15836	PREDICTED: glyoxylate reductase/hydroxypyruvate reductase-like [Chelonia mydas];PREDICTED: glyoxylate reductase/hydroxypyruvate reductase-like [Pelodiscus sinensis]	-	-	K00049	GRHPR	http://www.genome.jp/dbget-bin/www_bget?ko:K00049	Glycine, serine and threonine metabolism;Glyoxylate and dicarboxylate metabolism;Pyruvate metabolism	ko00260,ko00630,ko00620	KOG0068(E)(D-3-phosphoglycerate dehydrogenase, D-isomer-specific 2-hydroxy acid dehydrogenase superfamily)	sp|Q9UBQ7|GRHPR_HUMAN;gnl|BL_ORD_ID|29334;sp|Q91Z53|GRHPR_MOUSE	sp|Q9UBQ7|GRHPR_HUMAN Glyoxylate reductase/hydroxypyruvate reductase OS=Homo sapiens GN=GRHPR PE=1 SV=1;sp|Q9UBQ7|GRHPR_HUMAN Glyoxylate reductase/hydroxypyruvate reductase OS=Homo sapiens GN=GRHPR PE=1 SV=1;sp|Q91Z53|GRHPR_MOUSE Glyoxylate reductase/hydroxypyruvate reductase OS=Mus musculus GN=Grhpr PE=1 SV=1
PGAM1	2.55461	2.41007	2.36303	2.7409	2.81838	2.8024	2.83562	2.81364	2.80229	2.86944	2.96469	2.81518	2.78971	2.95772	3.10962	2.97124	3.00113	2.88829	PREDICTED: phosphoglycerate mutase 1 [Pelodiscus sinensis]	GO:0006096;GO:0005737;GO:0070062;GO:0008152;GO:0006094;GO:0003824;GO:0004619;GO:0004082;GO:0046538;GO:0019901;GO:0016868;GO:0005829;GO:0045730;GO:0016020;GO:0043209;GO:0043456;GO:0006110;GO:0016853;GO:0016787;GO:0005515;GO:0061621	glycolytic process;cytoplasm;extracellular exosome;metabolic process;gluconeogenesis;catalytic activity;phosphoglycerate mutase activity;bisphosphoglycerate mutase activity;2,3-bisphosphoglycerate-dependent phosphoglycerate mutase activity;protein kinase binding;intramolecular transferase activity, phosphotransferases;cytosol;respiratory burst;membrane;myelin sheath;regulation of pentose-phosphat…	K01834	PGAM,gpmA	http://www.genome.jp/dbget-bin/www_bget?ko:K01834	Glycine, serine and threonine metabolism;Glycolysis / Gluconeogenesis;Methane metabolism;Biosynthesis of amino acids;Carbon metabolism;Glucagon signaling pathway	ko00260,ko00010,ko00680,ko01230,ko01200,ko04922	KOG0235(G)(Phosphoglycerate mutase)	sp|P25113|PGAM1_RAT;sp|Q9DBJ1|PGAM1_MOUSE;gnl|BL_ORD_ID|124564	sp|P25113|PGAM1_RAT Phosphoglycerate mutase 1 OS=Rattus norvegicus GN=Pgam1 PE=1 SV=4;sp|Q9DBJ1|PGAM1_MOUSE Phosphoglycerate mutase 1 OS=Mus musculus GN=Pgam1 PE=1 SV=3;sp|Q9DBJ1|PGAM1_MOUSE Phosphoglycerate mutase 1 OS=Mus musculus GN=Pgam1 PE=1 SV=3
DMGDH	1.88041	1.74162	1.90634	1.30255	1.64147	1.57669	2.1724	2.08239	2.01106	2.05419	2.01385	1.94349	1.75793	1.92226	2.07965	1.51415	1.89669	1.87105	PREDICTED: dimethylglycine dehydrogenase, mitochondrial [Pelodiscus sinensis]	GO:0055114;GO:0016491	oxidation-reduction process;oxidoreductase activity	K00315	DMGDH	http://www.genome.jp/dbget-bin/www_bget?ko:K00315	Glycine, serine and threonine metabolism	ko00260	KOG2844(E)(Dimethylglycine dehydrogenase precursor)	gnl|BL_ORD_ID|402528;sp|Q9UI17|M2GD_HUMAN	sp|Q9UI17|M2GD_HUMAN Dimethylglycine dehydrogenase, mitochondrial OS=Homo sapiens GN=DMGDH PE=1 SV=2;sp|Q9UI17|M2GD_HUMAN Dimethylglycine dehydrogenase, mitochondrial OS=Homo sapiens GN=DMGDH PE=1 SV=2
SARDH	1.41145	1.5088	1.48572	1.49982	1.56914	1.45652	1.41714	1.53301	1.71508	1.56514	1.59351	1.49374	1.82737	1.9857	2.1469	1.89432	2.06337	2.04829	PREDICTED: sarcosine dehydrogenase, mitochondrial, partial [Pelodiscus sinensis]	GO:0005739;GO:0055114;GO:0016491	mitochondrion;oxidation-reduction process;oxidoreductase activity	K00314	SARDH	http://www.genome.jp/dbget-bin/www_bget?ko:K00314	Glycine, serine and threonine metabolism	ko00260	KOG2844(E)(Dimethylglycine dehydrogenase precursor)	gnl|BL_ORD_ID|488711;sp|Q9UL12|SARDH_HUMAN;sp|Q99LB7|SARDH_MOUSE	sp|Q9UL12|SARDH_HUMAN Sarcosine dehydrogenase, mitochondrial OS=Homo sapiens GN=SARDH PE=1 SV=1;sp|Q9UL12|SARDH_HUMAN Sarcosine dehydrogenase, mitochondrial OS=Homo sapiens GN=SARDH PE=1 SV=1;sp|Q99LB7|SARDH_MOUSE Sarcosine dehydrogenase, mitochondrial OS=Mus musculus GN=Sardh PE=1 SV=1
PCYT2	1.83677	1.72272	1.88897	1.87823	2.03627	1.92526	1.9208	1.88264	2.01528	1.98041	1.90227	1.87978	2.18616	2.24959	2.32789	2.22214	2.19576	2.21867	PREDICTED: ethanolamine-phosphate cytidylyltransferase isoform X2 [Pelodiscus sinensis]	-	-	K00967	PCYT2	http://www.genome.jp/dbget-bin/www_bget?ko:K00967	Glycerophospholipid metabolism;Phosphonate and phosphinate metabolism	ko00564,ko00440	KOG2804(I)(Phosphorylcholine transferase/cholinephosphate cytidylyltransferase)	sp|Q922E4|PCY2_MOUSE;gnl|BL_ORD_ID|122576	sp|Q922E4|PCY2_MOUSE Ethanolamine-phosphate cytidylyltransferase OS=Mus musculus GN=Pcyt2 PE=1 SV=1;sp|Q99447|PCY2_HUMAN Ethanolamine-phosphate cytidylyltransferase OS=Homo sapiens GN=PCYT2 PE=1 SV=1
GK	1.71433	1.88292	1.7881	1.4138	1.51548	1.64982	1.77772	1.73376	1.81398	1.75815	1.59273	1.67311	1.56879	1.77634	1.76842	1.625	1.72762	1.82086	PREDICTED: glycerol kinase [Pelodiscus sinensis]	GO:0016773;GO:0006072;GO:0005975;GO:0005739;GO:0046167;GO:0016310;GO:0016301;GO:0016740;GO:0006641;GO:0004370;GO:0006071	phosphotransferase activity, alcohol group as acceptor;glycerol-3-phosphate metabolic process;carbohydrate metabolic process;mitochondrion;glycerol-3-phosphate biosynthetic process;phosphorylation;kinase activity;transferase activity;triglyceride metabolic process;glycerol kinase activity;glycerol metabolic process	K00864	glpK,GK	http://www.genome.jp/dbget-bin/www_bget?ko:K00864	Glycerolipid metabolism;PPAR signaling pathway;Plant-pathogen interaction	ko00561,ko03320,ko04626	KOG2517(G)(Ribulose kinase and related carbohydrate kinases)	sp|Q64516|GLPK_MOUSE;sp|Q63060|GLPK_RAT;sp|Q0IID9|GLPK_BOVIN;gnl|BL_ORD_ID|14467	sp|Q64516|GLPK_MOUSE Glycerol kinase OS=Mus musculus GN=Gk PE=1 SV=2;sp|Q63060|GLPK_RAT Glycerol kinase OS=Rattus norvegicus GN=Gk PE=2 SV=1;sp|Q0IID9|GLPK_BOVIN Glycerol kinase OS=Bos taurus GN=GK PE=2 SV=1;sp|Q0IID9|GLPK_BOVIN Glycerol kinase OS=Bos taurus GN=GK PE=2 SV=1
LOC102443676	1.44685	1.256	1.63669	1.55727	1.72509	1.78661	1.76982	1.60325	1.65283	1.66181	2.04317	1.68386	2.22298	2.20615	2.31836	2.01812	1.63043	2.15128	PREDICTED: 2-acylglycerol O-acyltransferase 2-B-like [Pelodiscus sinensis]	GO:0016747;GO:0016021;GO:0016020	transferase activity, transferring acyl groups other than amino-acyl groups;integral component of membrane;membrane	K14457	MOGAT2,MGAT2	http://www.genome.jp/dbget-bin/www_bget?ko:K14457	Glycerolipid metabolism;Fat digestion and absorption	ko00561,ko04975	KOG0831(I)(Acyl-CoA:diacylglycerol acyltransferase (DGAT))	sp|Q5M8H5|MOGT2_XENTR;sp|Q5M7F4|MOG2B_XENLA;gnl|BL_ORD_ID|95367;sp|Q2KHS5|MOG2A_XENLA;sp|A2ADU9|AWAT1_MOUSE	sp|Q5M8H5|MOGT2_XENTR 2-acylglycerol O-acyltransferase 2 OS=Xenopus tropicalis GN=mogat2 PE=2 SV=1;sp|Q5M7F4|MOG2B_XENLA 2-acylglycerol O-acyltransferase 2-B OS=Xenopus laevis GN=mogat2-b PE=2 SV=1;sp|Q3SYC2|MOGT2_HUMAN 2-acylglycerol O-acyltransferase 2 OS=Homo sapiens GN=MOGAT2 PE=1 SV=2;sp|Q2KHS5|MOG2A_XENLA 2-acylglycerol O-acyltransferase 2-A OS=Xenopus laevis GN=mogat2-a PE=2 SV=1;sp|A2ADU9…
GSTP1	2.10927	2.069	2.22837	2.14687	2.2089	2.25373	1.82569	1.92184	1.99769	2.01477	1.88897	1.83251	2.28542	2.33796	2.66493	2.34659	2.24107	2.41506	PREDICTED: glutathione S-transferase P [Pelodiscus sinensis]	GO:0004364;GO:0008152	glutathione transferase activity;metabolic process	K00799	GST,gst	http://www.genome.jp/dbget-bin/www_bget?ko:K00799	Glutathione metabolism;Drug metabolism - cytochrome P450;Metabolism of xenobiotics by cytochrome P450	ko00480,ko00982,ko00980	KOG1695(O)(Glutathione S-transferase)	gnl|BL_ORD_ID|30266;sp|P80031|GSTP1_PIG	sp|Q9TTY8|GSTP1_CAPHI Glutathione S-transferase P OS=Capra hircus GN=GSTP1 PE=2 SV=2;sp|P80031|GSTP1_PIG Glutathione S-transferase P OS=Sus scrofa GN=GSTP1 PE=1 SV=2
LOC102456353	1.85046	1.8001	1.80359	1.65906	1.99414	1.7796	2.26288	2.07133	2.13758	2.26112	2.12597	1.92195	2.07181	2.441	2.38757	2.09043	2.26555	2.19363	PREDICTED: glutathione S-transferase 3 [Manacus vitellinus]<>XP_017933757.1 PREDICTED: glutathione S-transferase 3 [Manacus vitellinus]<>KFW78738.1 Glutathione S-transferase 3 [Manacus vitellinus];PREDICTED: glutathione S-transferase 3-like [Pelodiscus sinensis]	GO:0008152;GO:0016740;GO:0004364	metabolic process;transferase activity;glutathione transferase activity	K00799	GST,gst	http://www.genome.jp/dbget-bin/www_bget?ko:K00799	Glutathione metabolism;Drug metabolism - cytochrome P450;Metabolism of xenobiotics by cytochrome P450	ko00480,ko00982,ko00980	-	sp|P24472|GSTA4_MOUSE;sp|P26697|GSTA3_CHICK;gnl|BL_ORD_ID|28448	sp|P24472|GSTA4_MOUSE Glutathione S-transferase A4 OS=Mus musculus GN=Gsta4 PE=1 SV=3;sp|P26697|GSTA3_CHICK Glutathione S-transferase 3 OS=Gallus gallus PE=1 SV=2;sp|P26697|GSTA3_CHICK Glutathione S-transferase 3 OS=Gallus gallus PE=1 SV=2
LOC102457087	2.50504	2.33486	2.50887	2.49504	2.69571	2.49745	2.77625	2.76821	2.82675	2.89851	2.74504	2.60296	2.80881	3.16793	3.22885	2.83636	2.9319	3.07324	PREDICTED: glutathione S-transferase-like [Pelodiscus sinensis]<>XP_006137816.1 PREDICTED: glutathione S-transferase-like [Pelodiscus sinensis]	GO:0008152;GO:0016740;GO:0004364	metabolic process;transferase activity;glutathione transferase activity	K00799	GST,gst	http://www.genome.jp/dbget-bin/www_bget?ko:K00799	Glutathione metabolism;Drug metabolism - cytochrome P450;Metabolism of xenobiotics by cytochrome P450	ko00480,ko00982,ko00980	-	gnl|BL_ORD_ID|31821;sp|Q08393|GSTA2_CHICK	sp|Q08393|GSTA2_CHICK Glutathione S-transferase OS=Gallus gallus PE=2 SV=2;sp|Q08393|GSTA2_CHICK Glutathione S-transferase OS=Gallus gallus PE=2 SV=2
LOC102460239	2.74716	2.75494	2.72757	2.77566	2.79433	2.8647	2.80556	2.78939	2.85093	2.88615	2.79564	2.73713	3.04114	3.03282	3.21744	2.97062	3.04763	3.05506	PREDICTED: glutathione S-transferase 2-like [Pelodiscus sinensis]	GO:0008152;GO:0004364	metabolic process;glutathione transferase activity	K00799	GST,gst	http://www.genome.jp/dbget-bin/www_bget?ko:K00799	Glutathione metabolism;Drug metabolism - cytochrome P450;Metabolism of xenobiotics by cytochrome P450	ko00480,ko00982,ko00980	-	sp|P20136|GSTM2_CHICK;gnl|BL_ORD_ID|30257	sp|P20136|GSTM2_CHICK Glutathione S-transferase 2 OS=Gallus gallus GN=GSTM2 PE=1 SV=4;sp|P20136|GSTM2_CHICK Glutathione S-transferase 2 OS=Gallus gallus GN=GSTM2 PE=1 SV=4
MGST1	2.03354	1.99432	2.01132	1.98304	2.07544	2.02325	2.15327	2.13123	2.15479	2.13827	2.09486	2.09674	2.19335	2.43056	2.43959	2.15661	2.28215	2.35835	PREDICTED: microsomal glutathione S-transferase 1 [Pelodiscus sinensis];PREDICTED: LOW QUALITY PROTEIN: microsomal glutathione S-transferase 1 [Chelonia mydas]	-	-	K00799	GST,gst	http://www.genome.jp/dbget-bin/www_bget?ko:K00799	Glutathione metabolism;Drug metabolism - cytochrome P450;Metabolism of xenobiotics by cytochrome P450	ko00480,ko00982,ko00980	-	sp|P79382|MGST1_PIG;gnl|BL_ORD_ID|91481	sp|P79382|MGST1_PIG Microsomal glutathione S-transferase 1 OS=Sus scrofa GN=MGST1 PE=2 SV=3;sp|P79382|MGST1_PIG Microsomal glutathione S-transferase 1 OS=Sus scrofa GN=MGST1 PE=2 SV=3
LOC102448009	2.49805	2.38338	2.58239	2.71362	2.70102	2.53682	2.52521	2.56805	2.65523	2.5132	2.65857	2.76632	2.15734	2.05088	2.12294	2.08279	2.22141	2.19262	PREDICTED: tubulin beta chain-like [Pelodiscus sinensis]	-	-	K07375	TUBB	http://www.genome.jp/dbget-bin/www_bget?ko:K07375	Gap junction;Phagosome	ko04540,ko04145	KOG1375(Z)(Beta tubulin)	sp|Q91575|TBB5_XENLA;sp|Q2KJD0|TBB5_BOVIN;gnl|BL_ORD_ID|510811	sp|Q91575|TBB5_XENLA Tubulin beta chain OS=Xenopus laevis GN=tubb PE=2 SV=1;sp|Q2KJD0|TBB5_BOVIN Tubulin beta-5 chain OS=Bos taurus GN=TUBB5 PE=2 SV=1;sp|P99024|TBB5_MOUSE Tubulin beta-5 chain OS=Mus musculus GN=Tubb5 PE=1 SV=1
TUBB4A	2.37258	2.10636	2.14934	2.93547	3.01912	2.7962	2.81244	2.85881	2.81373	2.8117	2.88198	2.93884	2.45843	2.48193	2.49167	2.44689	2.40038	2.52493	PREDICTED: tubulin beta chain isoform X1 [Colobus angolensis palliatus];PREDICTED: tubulin beta-4A chain [Pelodiscus sinensis]	-	-	K07375	TUBB	http://www.genome.jp/dbget-bin/www_bget?ko:K07375	Gap junction;Phagosome	ko04540,ko04145	KOG1375(Z)(Beta tubulin)	sp|P30883|TBB4_XENLA;sp|P11833|TBB_PARLI;gnl|BL_ORD_ID|513484	sp|P30883|TBB4_XENLA Tubulin beta-4 chain OS=Xenopus laevis GN=tubb4 PE=2 SV=1;sp|P11833|TBB_PARLI Tubulin beta chain OS=Paracentrotus lividus PE=2 SV=1;sp|P68372|TBB4B_MOUSE Tubulin beta-4B chain OS=Mus musculus GN=Tubb4b PE=1 SV=1
SI	1.84155	1.91609	1.899	1.65167	1.78533	1.85376	1.88087	1.73159	2.01741	1.83467	1.93171	1.70723	2.24112	2.30643	2.28042	2.12011	2.18113	2.17292	PREDICTED: sucrase-isomaltase, intestinal [Pelodiscus sinensis]	GO:0070062;GO:0008152;GO:0003824;GO:0004553;GO:0005975;GO:0005886;GO:0004558;GO:0016324;GO:0032450;GO:0016021;GO:0016798;GO:0030246;GO:0005983;GO:0016020;GO:0004339;GO:0016160;GO:0044245;GO:0000023;GO:0016787	extracellular exosome;metabolic process;catalytic activity;hydrolase activity, hydrolyzing O-glycosyl compounds;carbohydrate metabolic process;plasma membrane;alpha-1,4-glucosidase activity;apical plasma membrane;maltose alpha-glucosidase activity;integral component of membrane;hydrolase activity, acting on glycosyl bonds;carbohydrate binding;starch catabolic process;membrane;glucan 1,4-alpha-glu…	K12047	MGAM	http://www.genome.jp/dbget-bin/www_bget?ko:K12047	Galactose metabolism;Starch and sucrose metabolism;Carbohydrate digestion and absorption	ko00052,ko00500,ko04973	KOG1066(GMO)(Glucosidase II catalytic (alpha) subunit and related enzymes, glycosyl hydrolase family 31)	sp|O43451|MGA_HUMAN;sp|Q2M2H8|MGAL_HUMAN;gnl|BL_ORD_ID|88942	sp|O43451|MGA_HUMAN Maltase-glucoamylase, intestinal OS=Homo sapiens GN=MGAM PE=1 SV=5;sp|Q2M2H8|MGAL_HUMAN Probable maltase-glucoamylase 2 OS=Homo sapiens GN=MGAM2 PE=2 SV=3;sp|O43451|MGA_HUMAN Maltase-glucoamylase, intestinal OS=Homo sapiens GN=MGAM PE=1 SV=5
SORD	1.94675	2.15851	1.87309	1.77859	1.8496	1.89735	1.91318	1.97202	2.09573	2.08483	1.89187	2.03503	1.93146	2.0333	2.04763	1.8962	2.12444	2.04175	PREDICTED: sorbitol dehydrogenase [Pelodiscus sinensis]	-	-	K00008	SORD,gutB	http://www.genome.jp/dbget-bin/www_bget?ko:K00008	Fructose and mannose metabolism;Pentose and glucuronate interconversions	ko00051,ko00040	KOG0024(Q)(Sorbitol dehydrogenase)	sp|Q58D31|DHSO_BOVIN;gnl|BL_ORD_ID|356346	sp|Q58D31|DHSO_BOVIN Sorbitol dehydrogenase OS=Bos taurus GN=SORD PE=2 SV=3;sp|Q58D31|DHSO_BOVIN Sorbitol dehydrogenase OS=Bos taurus GN=SORD PE=2 SV=3
TKFC	1.56455	1.36154	1.44154	1.91148	1.99029	1.98412	1.73536	1.69249	1.81358	1.7074	1.72616	1.6289	1.86207	1.92937	1.97575	1.83442	1.8238	1.91635	PREDICTED: triokinase/FMN cyclase [Pelodiscus sinensis]	GO:0006071;GO:0005515;GO:0061624;GO:0045087;GO:0070062;GO:0045088;GO:0044262;GO:0050354;GO:0046835;GO:0005524;GO:0034012;GO:0004371;GO:0005829;GO:0005634;GO:0039534;GO:0046872	glycerol metabolic process;protein binding;fructose catabolic process to hydroxyacetone phosphate and glyceraldehyde-3-phosphate;innate immune response;extracellular exosome;regulation of innate immune response;cellular carbohydrate metabolic process;triokinase activity;carbohydrate phosphorylation;ATP binding;FAD-AMP lyase (cyclizing) activity;glycerone kinase activity;cytosol;nucleus;negative r…	K00863	DAK,TKFC	http://www.genome.jp/dbget-bin/www_bget?ko:K00863	Fructose and mannose metabolism;Methane metabolism;Glycerolipid metabolism;Carbon metabolism;RIG-I-like receptor signaling pathway	ko00051,ko00680,ko00561,ko01200,ko04622	KOG2426(G)(Dihydroxyacetone kinase/glycerone kinase)	gnl|BL_ORD_ID|511749	sp|Q3LXA3|TKFC_HUMAN Triokinase/FMN cyclase OS=Homo sapiens GN=TKFC PE=1 SV=2
SGK1	1.85503	1.92742	1.75435	1.69197	1.84856	1.82393	2.04774	1.84603	1.97868	1.99874	1.91908	1.79078	2.07056	2.13796	2.27786	2.24849	2.04634	2.1182	PREDICTED: LOW QUALITY PROTEIN: serine/threonine-protein kinase Sgk1 [Pelodiscus sinensis]	GO:0004672;GO:0005524;GO:0004674;GO:0016310;GO:0016301;GO:0016740;GO:0000166;GO:0006468	protein kinase activity;ATP binding;protein serine/threonine kinase activity;phosphorylation;kinase activity;transferase activity;nucleotide binding;protein phosphorylation	K13302	SGK1	http://www.genome.jp/dbget-bin/www_bget?ko:K13302	FoxO signaling pathway;PI3K-Akt signaling pathway;mTOR signaling pathway;Aldosterone-regulated sodium reabsorption	ko04068,ko04151,ko04150,ko04960	KOG0690(T)(Serine/threonine protein kinase)	gnl|BL_ORD_ID|202031;sp|Q6U1I9|SGK1_CHICK	sp|Q6U1I9|SGK1_CHICK Serine/threonine-protein kinase Sgk1 OS=Gallus gallus GN=SGK1 PE=2 SV=1;sp|Q6U1I9|SGK1_CHICK Serine/threonine-protein kinase Sgk1 OS=Gallus gallus GN=SGK1 PE=2 SV=1
BCL6	1.28058	1.70842	1.50202	1.57967	1.39602	1.4615	1.60531	1.5463	1.69205	1.71122	1.83442	1.55642	2.09583	1.87396	2.20442	2.29704	2.04301	2.14088	PREDICTED: B-cell lymphoma 6 protein isoform X1 [Pelodiscus sinensis]<>XP_006122275.1 PREDICTED: B-cell lymphoma 6 protein isoform X1 [Pelodiscus sinensis]<>XP_014428658.1 PREDICTED: B-cell lymphoma 6 protein isoform X1 [Pelodiscus sinensis];PREDICTED: B-cell lymphoma 6 protein isoform X2 [Pelodiscus sinensis];PREDICTED: B-cell lymphoma 6 protein isoform X3 [Pelodiscus sinensis]	GO:0008285;GO:0030036;GO:0008104;GO:0003677;GO:0000122;GO:0048821;GO:0051272;GO:0030183;GO:0000902;GO:0042127;GO:0030890;GO:0003682;GO:0045892;GO:0045629;GO:0006974;GO:0001161;GO:0001227;GO:0000977;GO:0043565;GO:0003676;GO:0043087;GO:0031490;GO:0043065;GO:0003700;GO:0043066;GO:0005657;GO:0048294;GO:0002829;GO:0042092;GO:0005634;GO:0046872	negative regulation of cell proliferation;actin cytoskeleton organization;protein localization;DNA binding;negative regulation of transcription from RNA polymerase II promoter;erythrocyte development;positive regulation of cellular component movement;B cell differentiation;cell morphogenesis;regulation of cell proliferation;positive regulation of B cell proliferation;chromatin binding;negative re…	K15618	BCL6	http://www.genome.jp/dbget-bin/www_bget?ko:K15618	FoxO signaling pathway	ko04068	-	gnl|BL_ORD_ID|300669;sp|Q5ZM39|BCL6_CHICK	sp|Q5ZM39|BCL6_CHICK B-cell lymphoma 6 protein homolog OS=Gallus gallus GN=BCL6 PE=2 SV=1;sp|Q5ZM39|BCL6_CHICK B-cell lymphoma 6 protein homolog OS=Gallus gallus GN=BCL6 PE=2 SV=1
QDPR	1.82562	1.80257	1.72198	1.62201	1.70706	1.75312	1.8408	1.82776	1.90439	1.87581	1.87268	1.83213	1.74912	1.96223	2.08831	1.73119	1.7919	1.85358	PREDICTED: dihydropteridine reductase [Pelodiscus sinensis]	GO:0005737;GO:0070402;GO:0006559;GO:0070062;GO:0043005;GO:0005739;GO:0010044;GO:0005829;GO:0001889;GO:0033762;GO:0070404;GO:0055114;GO:0004155;GO:0016491;GO:0042803;GO:0010288;GO:0035690;GO:0006729	cytoplasm;NADPH binding;L-phenylalanine catabolic process;extracellular exosome;neuron projection;mitochondrion;response to aluminum ion;cytosol;liver development;response to glucagon;NADH binding;oxidation-reduction process;6,7-dihydropteridine reductase activity;oxidoreductase activity;protein homodimerization activity;response to lead ion;cellular response to drug;tetrahydrobiopterin biosynthe…	K00357	QDPR	http://www.genome.jp/dbget-bin/www_bget?ko:K00357	Folate biosynthesis	ko00790	-	gnl|BL_ORD_ID|362033;sp|P11348|DHPR_RAT	sp|P09417|DHPR_HUMAN Dihydropteridine reductase OS=Homo sapiens GN=QDPR PE=1 SV=2;sp|P11348|DHPR_RAT Dihydropteridine reductase OS=Rattus norvegicus GN=Qdpr PE=1 SV=1
COL1A1	1.95109	1.51001	1.7783	2.59831	2.76096	2.33045	2.34881	2.29037	2.37555	2.30707	2.45902	2.84011	1.62767	1.70183	1.78569	2.0423	2.12421	1.93242	PREDICTED: LOW QUALITY PROTEIN: collagen alpha-1(I) chain [Pelodiscus sinensis]	-	-	K06236	COL1A	http://www.genome.jp/dbget-bin/www_bget?ko:K06236	Focal adhesion;PI3K-Akt signaling pathway;ECM-receptor interaction;Protein digestion and absorption;Platelet activation	ko04510,ko04151,ko04512,ko04974,ko04611	KOG3544(W)(Collagens (type IV and type XIII), and related proteins)	sp|P02452|CO1A1_HUMAN;gnl|BL_ORD_ID|319212	sp|P02452|CO1A1_HUMAN Collagen alpha-1(I) chain OS=Homo sapiens GN=COL1A1 PE=1 SV=5;sp|P02452|CO1A1_HUMAN Collagen alpha-1(I) chain OS=Homo sapiens GN=COL1A1 PE=1 SV=5
COL1A2	1.86882	1.61321	1.84497	2.37596	2.32515	2.04348	2.26312	2.19396	2.21307	2.19078	2.3282	2.63856	1.31639	1.41162	1.37199	1.6193	1.79664	1.62961	PREDICTED: collagen alpha-2(I) chain [Pelodiscus sinensis]	-	-	K06236	COL1A	http://www.genome.jp/dbget-bin/www_bget?ko:K06236	Focal adhesion;PI3K-Akt signaling pathway;ECM-receptor interaction;Protein digestion and absorption;Platelet activation	ko04510,ko04151,ko04512,ko04974,ko04611	-	sp|P02467|CO1A2_CHICK;gnl|BL_ORD_ID|316394	sp|P02467|CO1A2_CHICK Collagen alpha-2(I) chain (Fragments) OS=Gallus gallus GN=COL1A2 PE=1 SV=2;sp|P02467|CO1A2_CHICK Collagen alpha-2(I) chain (Fragments) OS=Gallus gallus GN=COL1A2 PE=1 SV=2
COL4A2	1.71517	1.66332	1.50947	1.48101	1.63094	1.6192	1.75959	1.8515	1.81305	2.01055	1.88167	1.8907	1.58365	1.55108	1.46627	1.58512	1.49374	1.60163	PREDICTED: LOW QUALITY PROTEIN: collagen alpha-2(IV) chain [Pelodiscus sinensis]	GO:0005604;GO:0070062;GO:0031012;GO:0005587;GO:0005201;GO:0071560;GO:0005581;GO:0043231;GO:0016525;GO:0006351;GO:0035987;GO:0005578	basement membrane;extracellular exosome;extracellular matrix;collagen type IV trimer;extracellular matrix structural constituent;cellular response to transforming growth factor beta stimulus;collagen trimer;intracellular membrane-bounded organelle;negative regulation of angiogenesis;transcription, DNA-templated;endodermal cell differentiation;proteinaceous extracellular matrix	K06237	COL4A	http://www.genome.jp/dbget-bin/www_bget?ko:K06237	Focal adhesion;PI3K-Akt signaling pathway;ECM-receptor interaction;Protein digestion and absorption	ko04510,ko04151,ko04512,ko04974	KOG3544(W)(Collagens (type IV and type XIII), and related proteins)	sp|P08122|CO4A2_MOUSE;sp|P08572|CO4A2_HUMAN;gnl|BL_ORD_ID|315895	sp|P08122|CO4A2_MOUSE Collagen alpha-2(IV) chain OS=Mus musculus GN=Col4a2 PE=1 SV=4;sp|P08572|CO4A2_HUMAN Collagen alpha-2(IV) chain OS=Homo sapiens GN=COL4A2 PE=1 SV=4;sp|P08572|CO4A2_HUMAN Collagen alpha-2(IV) chain OS=Homo sapiens GN=COL4A2 PE=1 SV=4
COL6A1	1.70303	1.35946	1.61363	2.2029	2.31258	2.14114	2.09121	2.01544	2.12215	2.09272	2.14987	2.39709	1.20222	1.4312	1.45924	1.50596	1.44107	1.4929	PREDICTED: collagen alpha-1(VI) chain [Pelodiscus sinensis]	GO:0016020;GO:0005615;GO:0001649;GO:0048407;GO:0005581;GO:0005765;GO:0070062;GO:0007155;GO:0035987;GO:0005576;GO:0070208;GO:0031012;GO:0005578;GO:0071230;GO:0043234;GO:0042383	membrane;extracellular space;osteoblast differentiation;platelet-derived growth factor binding;collagen trimer;lysosomal membrane;extracellular exosome;cell adhesion;endodermal cell differentiation;extracellular region;protein heterotrimerization;extracellular matrix;proteinaceous extracellular matrix;cellular response to amino acid stimulus;protein complex;sarcolemma	K06238	COL6A	http://www.genome.jp/dbget-bin/www_bget?ko:K06238	Focal adhesion;PI3K-Akt signaling pathway;ECM-receptor interaction;Protein digestion and absorption	ko04510,ko04151,ko04512,ko04974	-	gnl|BL_ORD_ID|316414;sp|P12109|CO6A1_HUMAN;sp|Q04857|CO6A1_MOUSE	sp|P12109|CO6A1_HUMAN Collagen alpha-1(VI) chain OS=Homo sapiens GN=COL6A1 PE=1 SV=3;sp|P12109|CO6A1_HUMAN Collagen alpha-1(VI) chain OS=Homo sapiens GN=COL6A1 PE=1 SV=3;sp|Q04857|CO6A1_MOUSE Collagen alpha-1(VI) chain OS=Mus musculus GN=Col6a1 PE=1 SV=1
LOC102459888	1.77634	1.66417	1.57565	2.14305	2.24932	2.0269	1.86171	1.76552	1.77166	1.82387	1.88036	1.89481	1.65581	1.61458	1.65571	1.94231	1.68619	1.66096	PREDICTED: filamin-A-like, partial [Pelodiscus sinensis]	-	-	K04437	FLNA	http://www.genome.jp/dbget-bin/www_bget?ko:K04437	Focal adhesion;MAPK signaling pathway	ko04510,ko04010	-	gnl|BL_ORD_ID|392121	sp|P21333|FLNA_HUMAN Filamin-A OS=Homo sapiens GN=FLNA PE=1 SV=4
SHC1	1.36305	1.12189	1.08955	1.79379	1.86249	1.75778	1.81783	1.61289	1.65877	1.7992	1.76283	1.68726	1.51825	1.91217	1.56098	1.62716	1.49803	1.81445	PREDICTED: SHC-transforming protein 1 [Pelodiscus sinensis]	GO:0001525;GO:0030971;GO:0007165;GO:0035556	angiogenesis;receptor tyrosine kinase binding;signal transduction;intracellular signal transduction	K06279	SHC1	http://www.genome.jp/dbget-bin/www_bget?ko:K06279	Focal adhesion;ErbB signaling pathway;MAPK signaling pathway - fly;Phospholipase D signaling pathway;Ras signaling pathway;Estrogen signaling pathway;Insulin signaling pathway;Prolactin signaling pathway;Chemokine signaling pathway;Natural killer cell mediated cytotoxicity;Neurotrophin signaling pathway	ko04510,ko04012,ko04013,ko04072,ko04014,ko04915,ko04910,ko04917,ko04062,ko04650,ko04722	-	sp|Q8AY68|SHC1_XENLA;gnl|BL_ORD_ID|200691	sp|Q8AY68|SHC1_XENLA SHC-transforming protein 1 OS=Xenopus laevis GN=shc1 PE=1 SV=2;sp|Q8AY68|SHC1_XENLA SHC-transforming protein 1 OS=Xenopus laevis GN=shc1 PE=1 SV=2
SPP1	2.32451	2.60186	2.37798	2.46875	2.38578	2.73221	2.891	2.76178	2.89128	3.01562	2.8867	2.79439	2.70766	3.84649	2.62651	2.95602	2.86987	2.78969	PREDICTED: osteopontin [Pelodiscus sinensis]<>XP_006135477.1 PREDICTED: osteopontin [Pelodiscus sinensis]	GO:0070062;GO:0007155;GO:0001503;GO:0005615;GO:0033280	extracellular exosome;cell adhesion;ossification;extracellular space;response to vitamin D	K06250	SPP1,BNSP,OPN	http://www.genome.jp/dbget-bin/www_bget?ko:K06250	Focal adhesion;Apelin signaling pathway;PI3K-Akt signaling pathway;ECM-receptor interaction;Toll-like receptor signaling pathway	ko04510,ko04371,ko04151,ko04512,ko04620	-	gnl|BL_ORD_ID|434370	sp|P23498|OSTP_CHICK Osteopontin OS=Gallus gallus GN=SPP1 PE=2 SV=3
ACSL1	1.72648	1.73759	1.54728	1.47173	1.51534	1.54531	1.82969	1.75974	1.72214	1.76901	1.65408	1.79358	1.54593	1.57841	1.76343	1.49108	1.52479	1.88018	PREDICTED: long-chain-fatty-acid--CoA ligase 1 [Pelodiscus sinensis]<>XP_006128551.2 PREDICTED: long-chain-fatty-acid--CoA ligase 1 [Pelodiscus sinensis]	-	-	K01897	ACSL,fadD	http://www.genome.jp/dbget-bin/www_bget?ko:K01897	Ferroptosis;Quorum sensing;Peroxisome;Fatty acid biosynthesis;Fatty acid degradation;Fatty acid metabolism;Adipocytokine signaling pathway;PPAR signaling pathway	ko04216,ko02024,ko04146,ko00061,ko00071,ko01212,ko04920,ko03320	KOG1256(I)(Long-chain acyl-CoA synthetases (AMP-forming))	sp|P33121|ACSL1_HUMAN;gnl|BL_ORD_ID|270651	sp|P33121|ACSL1_HUMAN Long-chain-fatty-acid--CoA ligase 1 OS=Homo sapiens GN=ACSL1 PE=1 SV=1;sp|P33121|ACSL1_HUMAN Long-chain-fatty-acid--CoA ligase 1 OS=Homo sapiens GN=ACSL1 PE=1 SV=1
HMOX2	1.69399	1.67025	1.75747	1.47305	1.48657	1.59572	1.91297	1.80949	1.7743	1.89115	1.72173	1.76634	1.61815	2.73422	1.81064	1.51455	1.72222	1.68359	PREDICTED: heme oxygenase 2 [Pelodiscus sinensis]<>XP_006130666.1 PREDICTED: heme oxygenase 2 [Pelodiscus sinensis]<>XP_014432728.1 PREDICTED: heme oxygenase 2 [Pelodiscus sinensis]<>XP_014432729.1 PREDICTED: heme oxygenase 2 [Pelodiscus sinensis]<>XP_014432730.1 PREDICTED: heme oxygenase 2 [Pelodiscus sinensis]	GO:0006788;GO:0016021;GO:0016020;GO:0055114;GO:0004392	heme oxidation;integral component of membrane;membrane;oxidation-reduction process;heme oxygenase (decyclizing) activity	K00510	HMOX,hmuO,ho	http://www.genome.jp/dbget-bin/www_bget?ko:K00510	Ferroptosis;HIF-1 signaling pathway;Porphyrin and chlorophyll metabolism;Mineral absorption	ko04216,ko04066,ko00860,ko04978	-	sp|P23711|HMOX2_RAT;gnl|BL_ORD_ID|40958	sp|P23711|HMOX2_RAT Heme oxygenase 2 OS=Rattus norvegicus GN=Hmox2 PE=1 SV=1;sp|P23711|HMOX2_RAT Heme oxygenase 2 OS=Rattus norvegicus GN=Hmox2 PE=1 SV=1
SAT1	2.3751	2.65013	2.61233	2.24291	2.18941	2.40088	2.29829	2.2887	2.47306	2.30279	2.24927	2.32178	2.55138	2.47435	2.42424	2.55752	2.5762	2.45275	PREDICTED: diamine acetyltransferase 1 [Pelodiscus sinensis]	GO:0032920;GO:0008080;GO:0006595;GO:0001525;GO:0005622;GO:0032919;GO:0004145;GO:0046204;GO:0006596;GO:0009447;GO:0032918;GO:0042127;GO:0005515;GO:0006598;GO:0046208;GO:0016740;GO:0005829;GO:0019809	putrescine acetylation;N-acetyltransferase activity;polyamine metabolic process;angiogenesis;intracellular;spermine acetylation;diamine N-acetyltransferase activity;nor-spermidine metabolic process;polyamine biosynthetic process;putrescine catabolic process;spermidine acetylation;regulation of cell proliferation;protein binding;polyamine catabolic process;spermine catabolic process;transferase ac…	K00657	speG	http://www.genome.jp/dbget-bin/www_bget?ko:K00657	Ferroptosis;Arginine and proline metabolism	ko04216,ko00330	KOG3216(E)(Diamine acetyltransferase)	sp|Q8AXL1|SAT1_CHICK;gnl|BL_ORD_ID|488011	sp|Q8AXL1|SAT1_CHICK Diamine acetyltransferase 1 OS=Gallus gallus GN=SAT1 PE=2 SV=1;sp|Q8AXL1|SAT1_CHICK Diamine acetyltransferase 1 OS=Gallus gallus GN=SAT1 PE=2 SV=1
LOC102457299	1.85297	1.81809	1.89559	1.97845	2.04856	2.02156	2.09381	2.03767	2.04933	2.07085	2.14286	2.04474	2.18557	2.38675	2.27501	2.19526	2.20382	2.28133	PREDICTED: microtubule-associated proteins 1A/1B light chain 3A [Pelodiscus sinensis];PREDICTED: microtubule-associated proteins 1A/1B light chain 3A isoform X2 [Serinus canaria]	GO:0031625;GO:0006914;GO:0000045;GO:0008017;GO:0005829;GO:0031090;GO:0000422;GO:0005543;GO:0005776;GO:0008429;GO:0000421;GO:0006995	ubiquitin protein ligase binding;autophagy;autophagosome assembly;microtubule binding;cytosol;organelle membrane;mitophagy;phospholipid binding;autophagosome;phosphatidylethanolamine binding;autophagosome membrane;cellular response to nitrogen starvation	K10435	MAP1LC	http://www.genome.jp/dbget-bin/www_bget?ko:K10435	Ferroptosis	ko04216	KOG1654(Z)(Microtubule-associated anchor protein involved in autophagy and membrane trafficking)	sp|Q2HJ23|MLP3A_BOVIN;gnl|BL_ORD_ID|89152	sp|Q2HJ23|MLP3A_BOVIN Microtubule-associated proteins 1A/1B light chain 3A OS=Bos taurus GN=MAP1LC3A PE=2 SV=1;sp|Q2HJ23|MLP3A_BOVIN Microtubule-associated proteins 1A/1B light chain 3A OS=Bos taurus GN=MAP1LC3A PE=2 SV=1
NCOA4	1.66266	1.74749	1.55871	1.33566	1.5675	1.48657	1.97959	1.87726	1.72616	1.96797	1.87297	1.85046	1.38757	1.76537	1.60778	1.51255	1.59106	1.61826	PREDICTED: nuclear receptor coactivator 4 isoform X1 [Pelodiscus sinensis];PREDICTED: nuclear receptor coactivator 4 isoform X3 [Pelodiscus sinensis]	-	-	K09289	NCOA4,PTC3	http://www.genome.jp/dbget-bin/www_bget?ko:K09289	Ferroptosis	ko04216	-	gnl|BL_ORD_ID|109951	sp|Q13772|NCOA4_HUMAN Nuclear receptor coactivator 4 OS=Homo sapiens GN=NCOA4 PE=1 SV=1
ACADL	1.97795	2.20664	2.05354	1.78176	1.8589	1.96407	2.34116	2.33375	2.12905	2.30824	2.30458	2.22999	2.15186	2.20615	2.19285	2.02629	2.1329	2.10775	PREDICTED: long-chain specific acyl-CoA dehydrogenase, mitochondrial [Pelodiscus sinensis]	-	-	K00255	ACADL	http://www.genome.jp/dbget-bin/www_bget?ko:K00255	Fatty acid degradation;Fatty acid metabolism;PPAR signaling pathway	ko00071,ko01212,ko03320	KOG0139(I)(Short-chain acyl-CoA dehydrogenase)	sp|P15650|ACADL_RAT;sp|Q60HI0|ACADL_MACFA;sp|P79274|ACADL_PIG;gnl|BL_ORD_ID|261340	sp|P15650|ACADL_RAT Long-chain specific acyl-CoA dehydrogenase, mitochondrial OS=Rattus norvegicus GN=Acadl PE=1 SV=1;sp|Q60HI0|ACADL_MACFA Long-chain specific acyl-CoA dehydrogenase, mitochondrial OS=Macaca fascicularis GN=ACADL PE=2 SV=1;sp|P79274|ACADL_PIG Long-chain specific acyl-CoA dehydrogenase, mitochondrial OS=Sus scrofa GN=ACADL PE=2 SV=1;sp|P15650|ACADL_RAT Long-chain specific acyl-CoA…
ECI1	2.15131	2.19265	2.05873	2.0917	2.15954	2.06138	2.19986	2.21951	2.19114	2.34832	2.28567	2.13564	2.1352	2.36508	2.33357	2.22889	2.11604	2.11508	PREDICTED: enoyl-CoA delta isomerase 1, mitochondrial [Pelodiscus sinensis]	GO:0070062;GO:0008152;GO:0003824;GO:0005743;GO:0005739;GO:0006635;GO:0016853;GO:0004165	extracellular exosome;metabolic process;catalytic activity;mitochondrial inner membrane;mitochondrion;fatty acid beta-oxidation;isomerase activity;dodecenoyl-CoA delta-isomerase activity	K13238	DCI	http://www.genome.jp/dbget-bin/www_bget?ko:K13238	Fatty acid degradation	ko00071	KOG1679(I)(Enoyl-CoA hydratase);KOG1683(I)(Hydroxyacyl-CoA dehydrogenase/enoyl-CoA hydratase)	sp|P23965|ECI1_RAT;sp|P42126|ECI1_HUMAN;gnl|BL_ORD_ID|378757	sp|P23965|ECI1_RAT Enoyl-CoA delta isomerase 1, mitochondrial OS=Rattus norvegicus GN=Eci1 PE=1 SV=1;sp|P42126|ECI1_HUMAN Enoyl-CoA delta isomerase 1, mitochondrial OS=Homo sapiens GN=ECI1 PE=1 SV=1;sp|P42126|ECI1_HUMAN Enoyl-CoA delta isomerase 1, mitochondrial OS=Homo sapiens GN=ECI1 PE=1 SV=1
LOC102452016	1.4679	1.31994	1.43281	1.84572	1.90875	1.85461	1.76827	1.80298	1.65002	1.82562	1.70638	1.85181	2.07588	2.13136	2.10971	2.00479	1.95095	2.00975	PREDICTED: LOW QUALITY PROTEIN: ADP-ribosylation factor 6-like [Pelodiscus sinensis]	GO:0005737;GO:0070062;GO:0005622;GO:0097284;GO:0007264;GO:0033028;GO:0005886;GO:0031527;GO:0055038;GO:0031529;GO:0036010;GO:0005768;GO:0035020;GO:0030139;GO:0030838;GO:0001889;GO:0001726;GO:0016020;GO:0031996;GO:0030866;GO:0060998;GO:0000166;GO:0047485;GO:0005525	cytoplasm;extracellular exosome;intracellular;hepatocyte apoptotic process;small GTPase mediated signal transduction;myeloid cell apoptotic process;plasma membrane;filopodium membrane;recycling endosome membrane;ruffle organization;protein localization to endosome;endosome;regulation of Rac protein signal transduction;endocytic vesicle;positive regulation of actin filament polymerization;liver de…	K07941	ARF6	http://www.genome.jp/dbget-bin/www_bget?ko:K07941	Endocytosis;Phospholipase D signaling pathway;Ras signaling pathway;Fc gamma R-mediated phagocytosis	ko04144,ko04072,ko04014,ko04666	KOG0071(U)(GTP-binding ADP-ribosylation factor Arf6 (dArf3))	sp|P62332|ARF6_RAT;sp|Q007T5|ARF6_PIG;gnl|BL_ORD_ID|282523	sp|P62332|ARF6_RAT ADP-ribosylation factor 6 OS=Rattus norvegicus GN=Arf6 PE=1 SV=2;sp|Q007T5|ARF6_PIG ADP-ribosylation factor 6 OS=Sus scrofa GN=ARF6 PE=2 SV=1;sp|Q007T5|ARF6_PIG ADP-ribosylation factor 6 OS=Sus scrofa GN=ARF6 PE=2 SV=1
RAB5C	1.81391	1.72395	1.78675	1.79253	1.86088	1.85625	2.00449	1.9287	1.95794	2.00199	1.93389	1.91514	1.98462	2.14866	2.04778	2.00719	1.91719	1.97225	PREDICTED: ras-related protein Rab-5C [Pelodiscus sinensis]	GO:0005769;GO:0005765;GO:0070062;GO:0019003;GO:0003924;GO:0007264;GO:0005886;GO:0043231;GO:0030139;GO:0005811;GO:0005525;GO:0048227;GO:0030100	early endosome;lysosomal membrane;extracellular exosome;GDP binding;GTPase activity;small GTPase mediated signal transduction;plasma membrane;intracellular membrane-bounded organelle;endocytic vesicle;lipid droplet;GTP binding;plasma membrane to endosome transport;regulation of endocytosis	K07889	RAB5C	http://www.genome.jp/dbget-bin/www_bget?ko:K07889	Endocytosis;Phagosome;Ras signaling pathway;Vasopressin-regulated water reabsorption	ko04144,ko04145,ko04014,ko04962	KOG0092(U)(GTPase Rab5/YPT51 and related small G protein superfamily GTPases)	gnl|BL_ORD_ID|160074;sp|P51147|RAB5C_CANLF	sp|P51147|RAB5C_CANLF Ras-related protein Rab-5C OS=Canis lupus familiaris GN=RAB5C PE=2 SV=1;sp|P51147|RAB5C_CANLF Ras-related protein Rab-5C OS=Canis lupus familiaris GN=RAB5C PE=2 SV=1
RAB11A	1.81137	1.90396	1.86534	1.7223	1.73568	1.79623	1.91672	1.90162	1.91062	1.93957	1.8367	1.91275	1.77444	1.94527	1.91635	1.73038	1.86623	1.81037	PREDICTED: ras-related protein Rab-11A, partial [Acanthisitta chloris]	-	-	K07904	RAB11A	http://www.genome.jp/dbget-bin/www_bget?ko:K07904	Endocytosis;Pancreatic secretion;Endocrine and other factor-regulated calcium reabsorption;Vasopressin-regulated water reabsorption	ko04144,ko04972,ko04961,ko04962	KOG0087(U)(GTPase Rab11/YPT3, small G protein superfamily)	sp|Q5ZJN2|RB11A_CHICK;gnl|BL_ORD_ID|153215	sp|Q5ZJN2|RB11A_CHICK Ras-related protein Rab-11A OS=Gallus gallus GN=RAB11A PE=2 SV=1;sp|Q5ZJN2|RB11A_CHICK Ras-related protein Rab-11A OS=Gallus gallus GN=RAB11A PE=2 SV=1
CLTC	1.96722	2.03282	1.82802	1.72705	1.762	1.87697	1.94861	1.98232	1.98726	2.00659	1.86958	1.9342	1.734	1.99856	1.85968	1.7492	1.79581	1.83588	PREDICTED: clathrin heavy chain 1 [Pelodiscus sinensis];PREDICTED: clathrin heavy chain 1 isoform X1 [Pseudopodoces humilis]<>XP_015502167.1 PREDICTED: clathrin heavy chain 1 isoform X2 [Parus major]	GO:0001649;GO:1990498;GO:0005737;GO:0006914;GO:0030315;GO:0070062;GO:1900126;GO:0030136;GO:0003725;GO:0033572;GO:0005739;GO:0031012;GO:0042147;GO:0007030;GO:0030117;GO:0090307;GO:0051301;GO:0043234;GO:0030130;GO:0019901;GO:0032051;GO:0005856;GO:0031523;GO:0044822;GO:1903561;GO:0030132;GO:0006898;GO:0031072;GO:0042470;GO:0016192;GO:0016020;GO:0031623;GO:0007067;GO:0060236;GO:0005925;GO:0043209;GO:…	osteoblast differentiation;mitotic spindle microtubule;cytoplasm;autophagy;T-tubule;extracellular exosome;negative regulation of hyaluronan biosynthetic process;clathrin-coated vesicle;double-stranded RNA binding;transferrin transport;mitochondrion;extracellular matrix;retrograde transport, endosome to Golgi;Golgi organization;membrane coat;mitotic spindle assembly;cell division;protein complex;c…	K04646	CLTC	http://www.genome.jp/dbget-bin/www_bget?ko:K04646	Endocytosis;Lysosome;Endocrine and other factor-regulated calcium reabsorption;Synaptic vesicle cycle	ko04144,ko04142,ko04961,ko04721	KOG0985(U)(Vesicle coat protein clathrin, heavy chain)	sp|Q00610|CLH1_HUMAN;sp|Q68FD5|CLH1_MOUSE;gnl|BL_ORD_ID|334932	sp|Q00610|CLH1_HUMAN Clathrin heavy chain 1 OS=Homo sapiens GN=CLTC PE=1 SV=5;sp|Q68FD5|CLH1_MOUSE Clathrin heavy chain 1 OS=Mus musculus GN=Cltc PE=1 SV=3;sp|Q68FD5|CLH1_MOUSE Clathrin heavy chain 1 OS=Mus musculus GN=Cltc PE=1 SV=3
DAB2	2.02572	1.83746	1.8074	1.64611	1.88224	1.81809	2.08554	1.993	2.12333	2.07214	1.86225	1.95655	1.77576	2.11247	1.82614	1.73102	1.78831	1.78618	PREDICTED: disabled homolog 2 isoform X3 [Chrysemys picta bellii];PREDICTED: disabled homolog 2 isoform X1 [Pelodiscus sinensis];PREDICTED: disabled homolog 2 isoform X2 [Pelodiscus sinensis]	GO:0032436;GO:0038024;GO:0032091;GO:0070062;GO:0030136;GO:0005730;GO:0035615;GO:0005886;GO:2000370;GO:0045892;GO:2000096;GO:0035026;GO:0010718;GO:0030511;GO:0005925;GO:2000643;GO:0043231;GO:0005905;GO:0046332;GO:0043066;GO:0008022;GO:0070022	positive regulation of proteasomal ubiquitin-dependent protein catabolic process;cargo receptor activity;negative regulation of protein binding;extracellular exosome;clathrin-coated vesicle;nucleolus;clathrin adaptor activity;plasma membrane;positive regulation of clathrin-dependent endocytosis;negative regulation of transcription, DNA-templated;positive regulation of Wnt signaling pathway, plana…	K12475	DAB2	http://www.genome.jp/dbget-bin/www_bget?ko:K12475	Endocytosis	ko04144	KOG3535(T)(Adaptor protein Disabled)	gnl|BL_ORD_ID|349690;sp|O88797|DAB2_RAT;sp|P98082|DAB2_HUMAN;sp|P98078|DAB2_MOUSE	sp|P98082|DAB2_HUMAN Disabled homolog 2 OS=Homo sapiens GN=DAB2 PE=1 SV=3;sp|O88797|DAB2_RAT Disabled homolog 2 OS=Rattus norvegicus GN=Dab2 PE=1 SV=1;sp|P98082|DAB2_HUMAN Disabled homolog 2 OS=Homo sapiens GN=DAB2 PE=1 SV=3;sp|P98078|DAB2_MOUSE Disabled homolog 2 OS=Mus musculus GN=Dab2 PE=1 SV=2
LOC102447049	1.77415	1.66969	1.80949	1.81737	1.87743	2.00928	1.61172	1.78512	1.82982	1.6535	1.56808	1.78561	2.18107	2.11524	2.04474	2.26855	2.11714	2.12795	PREDICTED: PH and SEC7 domain-containing protein 4-like [Pelodiscus sinensis]	-	-	K12494	PSD	http://www.genome.jp/dbget-bin/www_bget?ko:K12494	Endocytosis	ko04144	KOG0929(U)(Guanine nucleotide exchange factor)	gnl|BL_ORD_ID|142925;sp|Q8NDX1|PSD4_HUMAN	sp|Q8NDX1|PSD4_HUMAN PH and SEC7 domain-containing protein 4 OS=Homo sapiens GN=PSD4 PE=1 SV=2;sp|Q8NDX1|PSD4_HUMAN PH and SEC7 domain-containing protein 4 OS=Homo sapiens GN=PSD4 PE=1 SV=2
RAB11FIP3	1.58195	1.48387	1.549	1.8293	1.91556	2.01812	1.81776	1.83461	1.81928	1.79996	1.76834	1.8253	1.83721	1.98865	1.9589	1.81365	1.92737	1.93847	PREDICTED: rab11 family-interacting protein 3 isoform X3 [Pelodiscus sinensis];PREDICTED: rab11 family-interacting protein 3 isoform X2 [Pelodiscus sinensis];PREDICTED: rab11 family-interacting protein 3 isoform X1 [Pelodiscus sinensis]	GO:0016020;GO:0017137;GO:0005654;GO:0030496;GO:0070164;GO:0043231;GO:0042803;GO:0045171;GO:0005509;GO:0061512;GO:0055037;GO:0005815;GO:0000910;GO:0005768;GO:0032154;GO:0016192;GO:0005813;GO:0030306;GO:0032456	membrane;Rab GTPase binding;nucleoplasm;midbody;negative regulation of adiponectin secretion;intracellular membrane-bounded organelle;protein homodimerization activity;intercellular bridge;calcium ion binding;protein localization to cilium;recycling endosome;microtubule organizing center;cytokinesis;endosome;cleavage furrow;vesicle-mediated transport;centrosome;ADP-ribosylation factor binding;end…	K12485	RAB11FIP3_4	http://www.genome.jp/dbget-bin/www_bget?ko:K12485	Endocytosis	ko04144	-	gnl|BL_ORD_ID|167885;gnl|BL_ORD_ID|161298;sp|O75154|RFIP3_HUMAN;sp|Q8CHD8|RFIP3_MOUSE	sp|Q8CHD8|RFIP3_MOUSE Rab11 family-interacting protein 3 OS=Mus musculus GN=Rab11fip3 PE=1 SV=2;sp|O75154|RFIP3_HUMAN Rab11 family-interacting protein 3 OS=Homo sapiens GN=RAB11FIP3 PE=1 SV=1;sp|O75154|RFIP3_HUMAN Rab11 family-interacting protein 3 OS=Homo sapiens GN=RAB11FIP3 PE=1 SV=1;sp|Q8CHD8|RFIP3_MOUSE Rab11 family-interacting protein 3 OS=Mus musculus GN=Rab11fip3 PE=1 SV=2
VPS29	2.25981	2.34072	1.93384	1.98887	1.75243	1.94949	2.261	2.31856	2.08257	1.99454	1.887	1.97433	2.06558	2.24152	2.17626	1.762	1.80652	1.80229	PREDICTED: vacuolar protein sorting-associated protein 29, partial [Pelodiscus sinensis]	GO:0030904;GO:0030906;GO:0005737;GO:0005769;GO:0015031;GO:0070062;GO:0016055;GO:0010008;GO:0008565;GO:0006810;GO:0042147;GO:0005768;GO:0005829;GO:0016020;GO:1990126;GO:0005770;GO:0043231;GO:0005515;GO:0006886;GO:0046872	retromer complex;retromer, cargo-selective complex;cytoplasm;early endosome;protein transport;extracellular exosome;Wnt signaling pathway;endosome membrane;protein transporter activity;transport;retrograde transport, endosome to Golgi;endosome;cytosol;membrane;retrograde transport, endosome to plasma membrane;late endosome;intracellular membrane-bounded organelle;protein binding;intracellular pro…	K18467	VPS29	http://www.genome.jp/dbget-bin/www_bget?ko:K18467	Endocytosis	ko04144	KOG3325(U)(Membrane coat complex Retromer, subunit VPS29/PEP11)	sp|Q9UBQ0|VPS29_HUMAN;gnl|BL_ORD_ID|250491	sp|Q9UBQ0|VPS29_HUMAN Vacuolar protein sorting-associated protein 29 OS=Homo sapiens GN=VPS29 PE=1 SV=1;sp|Q3T0M0|VPS29_BOVIN Vacuolar protein sorting-associated protein 29 OS=Bos taurus GN=VPS29 PE=2 SV=1
LOC102458297	2.11344	2.0083	1.98574	1.89949	2.04446	2.00268	2.19064	2.16239	2.03747	2.16655	2.24647	2.22253	2.2335	2.42894	2.52608	2.15878	2.28664	2.47216	PREDICTED: LOW QUALITY PROTEIN: dimethylaniline monooxygenase [N-oxide-forming] 5-like [Pelodiscus sinensis]	GO:0005737;GO:0004497;GO:0050660;GO:0016021;GO:0050661;GO:0016020;GO:0031090;GO:0004499;GO:0005789;GO:0055114;GO:0016491;GO:0043231;GO:0005783	cytoplasm;monooxygenase activity;flavin adenine dinucleotide binding;integral component of membrane;NADP binding;membrane;organelle membrane;N,N-dimethylaniline monooxygenase activity;endoplasmic reticulum membrane;oxidation-reduction process;oxidoreductase activity;intracellular membrane-bounded organelle;endoplasmic reticulum	K00485	FMO	http://www.genome.jp/dbget-bin/www_bget?ko:K00485	Drug metabolism - cytochrome P450	ko00982	KOG1399(Q)(Flavin-containing monooxygenase)	sp|Q04799|FMO5_RABIT;gnl|BL_ORD_ID|3658;sp|Q8K4C0|FMO5_RAT	sp|Q04799|FMO5_RABIT Dimethylaniline monooxygenase [N-oxide-forming] 5 OS=Oryctolagus cuniculus GN=FMO5 PE=1 SV=2;sp|Q04799|FMO5_RABIT Dimethylaniline monooxygenase [N-oxide-forming] 5 OS=Oryctolagus cuniculus GN=FMO5 PE=1 SV=2;sp|Q8K4C0|FMO5_RAT Dimethylaniline monooxygenase [N-oxide-forming] 5 OS=Rattus norvegicus GN=Fmo5 PE=1 SV=3
RNASEH2A	1.88969	1.67071	1.96019	2.38897	2.42244	2.30125	2.03193	2.21442	2.17687	1.99896	2.12153	2.17806	1.9709	1.93636	1.96204	1.99756	2.10206	2.04076	PREDICTED: ribonuclease H2 subunit A [Pelodiscus sinensis]	GO:0005737;GO:0016787;GO:0005654;GO:0032299;GO:0004519;GO:0003723;GO:0004523;GO:0043137;GO:0006401;GO:0016070;GO:0006298;GO:0003676;GO:0004518;GO:0090502	cytoplasm;hydrolase activity;nucleoplasm;ribonuclease H2 complex;endonuclease activity;RNA binding;RNA-DNA hybrid ribonuclease activity;DNA replication, removal of RNA primer;RNA catabolic process;RNA metabolic process;mismatch repair;nucleic acid binding;nuclease activity;RNA phosphodiester bond hydrolysis, endonucleolytic	K10743	RNASEH2A	http://www.genome.jp/dbget-bin/www_bget?ko:K10743	DNA replication	ko03030	KOG2299(L)(Ribonuclease HI)	sp|Q2TBT5|RNH2A_BOVIN;gnl|BL_ORD_ID|177554	sp|Q2TBT5|RNH2A_BOVIN Ribonuclease H2 subunit A OS=Bos taurus GN=RNASEH2A PE=1 SV=1;sp|Q2TBT5|RNH2A_BOVIN Ribonuclease H2 subunit A OS=Bos taurus GN=RNASEH2A PE=1 SV=1
RNASEH2C	1.76805	1.48216	1.59406	1.8477	1.70234	1.71425	1.6026	1.39199	1.61077	1.38917	1.2833	1.46523	1.70148	1.60477	1.53895	1.58501	1.55991	1.46879	PREDICTED: ribonuclease H2 subunit C [Pelodiscus sinensis]	GO:0006401;GO:0032299;GO:0004523	RNA catabolic process;ribonuclease H2 complex;RNA-DNA hybrid ribonuclease activity	K10745	RNASEH2C	http://www.genome.jp/dbget-bin/www_bget?ko:K10745	DNA replication	ko03030	-	gnl|BL_ORD_ID|181075	sp|Q8TDP1|RNH2C_HUMAN Ribonuclease H2 subunit C OS=Homo sapiens GN=RNASEH2C PE=1 SV=1
BCAT1	1.43648	1.72485	1.69923	1.53656	1.47144	1.46731	1.57715	1.60433	1.6131	1.61794	1.48316	1.46479	1.7364	1.5753	1.71164	1.8202	1.58602	1.73576	PREDICTED: branched-chain-amino-acid aminotransferase, cytosolic isoform X2 [Pelodiscus sinensis];PREDICTED: branched-chain-amino-acid aminotransferase, cytosolic isoform X1 [Chrysemys picta bellii];PREDICTED: branched-chain-amino-acid aminotransferase, cytosolic isoform X1 [Pelodiscus sinensis]	GO:0009082;GO:0008152;GO:0003824;GO:0008483;GO:0052655;GO:0016740;GO:0008652;GO:0004084;GO:0052656;GO:0052654;GO:0009081	branched-chain amino acid biosynthetic process;metabolic process;catalytic activity;transaminase activity;L-valine transaminase activity;transferase activity;cellular amino acid biosynthetic process;branched-chain-amino-acid transaminase activity;L-isoleucine transaminase activity;L-leucine transaminase activity;branched-chain amino acid metabolic process	K00826	E2.6.1.42,ilvE	http://www.genome.jp/dbget-bin/www_bget?ko:K00826	Cysteine and methionine metabolism;Valine, leucine and isoleucine biosynthesis;Valine, leucine and isoleucine degradation;Pantothenate and CoA biosynthesis;2-Oxocarboxylic acid metabolism;Biosynthesis of amino acids	ko00270,ko00290,ko00280,ko00770,ko01210,ko01230	KOG0975(E)(Branched chain aminotransferase BCAT1, pyridoxal phosphate enzymes type IV superfamily)	gnl|BL_ORD_ID|302382;sp|P54687|BCAT1_HUMAN	sp|P54687|BCAT1_HUMAN Branched-chain-amino-acid aminotransferase, cytosolic OS=Homo sapiens GN=BCAT1 PE=1 SV=3;sp|P54687|BCAT1_HUMAN Branched-chain-amino-acid aminotransferase, cytosolic OS=Homo sapiens GN=BCAT1 PE=1 SV=3
LDH-A	2.28208	2.33632	2.30138	2.20901	2.22235	2.28058	2.23845	2.29188	2.32019	2.46386	2.32677	2.27738	2.40281	2.87775	2.78672	2.53267	2.75043	2.58928	PREDICTED: L-lactate dehydrogenase A chain [Pelodiscus sinensis]	GO:0005737;GO:0003824;GO:0005975;GO:0055114;GO:0016491;GO:0004459;GO:0016616;GO:0019752	cytoplasm;catalytic activity;carbohydrate metabolic process;oxidation-reduction process;oxidoreductase activity;L-lactate dehydrogenase activity;oxidoreductase activity, acting on the CH-OH group of donors, NAD or NADP as acceptor;carboxylic acid metabolic process	K00016	LDH,ldh	http://www.genome.jp/dbget-bin/www_bget?ko:K00016	Cysteine and methionine metabolism;Glycolysis / Gluconeogenesis;Propanoate metabolism;Pyruvate metabolism;Glucagon signaling pathway	ko00270,ko00010,ko00640,ko00620,ko04922	KOG1495(C)(Lactate dehydrogenase)	gnl|BL_ORD_ID|53634	sp|Q98SL0|LDHA_PELSJ L-lactate dehydrogenase A chain OS=Pelodiscus sinensis japonicus GN=LDHA PE=2 SV=3
LOC102462297	2.06956	1.94748	1.80216	2.48153	2.72879	2.66375	2.72448	2.65738	2.49118	2.72758	2.66243	2.58906	2.2403	2.93087	2.71585	2.34758	2.60277	2.6255	PREDICTED: L-lactate dehydrogenase A chain-like [Pelodiscus sinensis]	GO:0005737;GO:0003824;GO:0005975;GO:0055114;GO:0016491;GO:0004459;GO:0016616;GO:0019752	cytoplasm;catalytic activity;carbohydrate metabolic process;oxidation-reduction process;oxidoreductase activity;L-lactate dehydrogenase activity;oxidoreductase activity, acting on the CH-OH group of donors, NAD or NADP as acceptor;carboxylic acid metabolic process	K00016	LDH,ldh	http://www.genome.jp/dbget-bin/www_bget?ko:K00016	Cysteine and methionine metabolism;Glycolysis / Gluconeogenesis;Propanoate metabolism;Pyruvate metabolism;Glucagon signaling pathway	ko00270,ko00010,ko00640,ko00620,ko04922	KOG1495(C)(Lactate dehydrogenase)	gnl|BL_ORD_ID|53634	sp|Q98SL0|LDHA_PELSJ L-lactate dehydrogenase A chain OS=Pelodiscus sinensis japonicus GN=LDHA PE=2 SV=3
CTH	2.23442	2.26126	2.10068	1.80236	2.07704	2.02173	2.41697	2.30029	2.2751	2.34608	2.23157	2.2032	2.1112	2.50043	2.45356	2.09496	2.34633	2.20855	PREDICTED: cystathionine gamma-lyase isoform X1 [Pelodiscus sinensis];PREDICTED: cystathionine gamma-lyase isoform X2 [Pelodiscus sinensis]	GO:0044540;GO:0005737;GO:0070062;GO:0042802;GO:0003824;GO:1904831;GO:0018272;GO:0047982;GO:0019343;GO:0005516;GO:2001234;GO:0051092;GO:0070814;GO:0030170;GO:0071266;GO:0016829;GO:0005829;GO:0000098;GO:0030968;GO:0006534;GO:0019344;GO:0080146;GO:0005515;GO:0051289;GO:0043066;GO:0003962;GO:0044524;GO:0016846;GO:0019346;GO:0004123;GO:0005634;GO:0043123	L-cystine L-cysteine-lyase (deaminating);cytoplasm;extracellular exosome;identical protein binding;catalytic activity;positive regulation of aortic smooth muscle cell differentiation;protein-pyridoxal-5-phosphate linkage via peptidyl-N6-pyridoxal phosphate-L-lysine;homocysteine desulfhydrase activity;cysteine biosynthetic process via cystathionine;calmodulin binding;negative regulation of apoptot…	K01758	CTH	http://www.genome.jp/dbget-bin/www_bget?ko:K01758	Cysteine and methionine metabolism;Glycine, serine and threonine metabolism;Selenocompound metabolism;Biosynthesis of amino acids	ko00270,ko00260,ko00450,ko01230	KOG0053(E)(Cystathionine beta-lyases/cystathionine gamma-synthases)	gnl|BL_ORD_ID|329182;gnl|BL_ORD_ID|323734;sp|Q58DW2|CGL_BOVIN	sp|P32929|CGL_HUMAN Cystathionine gamma-lyase OS=Homo sapiens GN=CTH PE=1 SV=3;sp|P55216|CGL2_CAEEL Putative cystathionine gamma-lyase 2 OS=Caenorhabditis elegans GN=cth-2 PE=3 SV=1;sp|Q58DW2|CGL_BOVIN Cystathionine gamma-lyase OS=Bos taurus GN=CTH PE=2 SV=1
LOC102445649	3.26261	3.1665	2.97551	2.79338	3.08189	2.99497	3.28703	3.33048	3.32068	3.2348	3.06167	3.16232	3.14196	3.13076	3.40492	2.80296	3.20408	3.12535	PREDICTED: betaine--homocysteine S-methyltransferase 1 [Pelodiscus sinensis]	GO:0005737;GO:0047150;GO:0009086;GO:0016740;GO:0005829;GO:0008898;GO:0032259;GO:0008168;GO:0008270;GO:0046872	cytoplasm;betaine-homocysteine S-methyltransferase activity;methionine biosynthetic process;transferase activity;cytosol;S-adenosylmethionine-homocysteine S-methyltransferase activity;methylation;methyltransferase activity;zinc ion binding;metal ion binding	K00544	BHMT	http://www.genome.jp/dbget-bin/www_bget?ko:K00544	Cysteine and methionine metabolism;Glycine, serine and threonine metabolism	ko00270,ko00260	KOG1579(E)(Homocysteine S-methyltransferase)	sp|Q93088|BHMT1_HUMAN;gnl|BL_ORD_ID|306831	sp|Q93088|BHMT1_HUMAN Betaine--homocysteine S-methyltransferase 1 OS=Homo sapiens GN=BHMT PE=1 SV=2;sp|Q93088|BHMT1_HUMAN Betaine--homocysteine S-methyltransferase 1 OS=Homo sapiens GN=BHMT PE=1 SV=2
DNMT1	1.91089	1.87887	2.00398	2.17583	2.03993	2.09075	1.83455	1.87384	1.86016	1.85902	1.8776	1.92236	1.56608	1.60304	1.48144	1.57623	1.66783	1.65906	PREDICTED: DNA (cytosine-5)-methyltransferase 1 [Pelodiscus sinensis]	-	-	K00558	DNMT1,dcm	http://www.genome.jp/dbget-bin/www_bget?ko:K00558	Cysteine and methionine metabolism	ko00270	-	gnl|BL_ORD_ID|363213;sp|Q92072|DNMT1_CHICK	sp|Q92072|DNMT1_CHICK DNA (cytosine-5)-methyltransferase 1 OS=Gallus gallus GN=DNMT1 PE=1 SV=1;sp|Q92072|DNMT1_CHICK DNA (cytosine-5)-methyltransferase 1 OS=Gallus gallus GN=DNMT1 PE=1 SV=1
C8G	1.70842	1.28847	1.73111	1.0693	1.51917	1.2388	1.79288	1.60304	1.84788	1.7876	1.72074	1.6066	1.7888	2.23279	2.18036	1.23452	1.5955	2.04477	PREDICTED: complement component C8 gamma chain isoform X1 [Pelodiscus sinensis];PREDICTED: complement component C8 gamma chain isoform X2 [Pelodiscus sinensis]	GO:0070062;GO:0072562;GO:0005576;GO:0036094	extracellular exosome;blood microparticle;extracellular region;small molecule binding	K03999	C8G	http://www.genome.jp/dbget-bin/www_bget?ko:K03999	Complement and coagulation cascades	ko04610	-	gnl|BL_ORD_ID|317998	sp|P07360|CO8G_HUMAN Complement component C8 gamma chain OS=Homo sapiens GN=C8G PE=1 SV=3
SERPING1	1.25431	0.925828	1.74997	1.54108	1.84572	1.56972	1.53807	1.71542	1.73344	1.79239	2.18144	1.60746	2.02036	2.21091	1.9145	2.02436	1.90612	2.04724	PREDICTED: plasma protease C1 inhibitor [Pelodiscus sinensis]	GO:0005615;GO:0010951;GO:0008233;GO:0070062;GO:0006508;GO:0072562;GO:0004867;GO:0001869	extracellular space;negative regulation of endopeptidase activity;peptidase activity;extracellular exosome;proteolysis;blood microparticle;serine-type endopeptidase inhibitor activity;negative regulation of complement activation, lectin pathway	K04001	SERPING1,C1INH	http://www.genome.jp/dbget-bin/www_bget?ko:K04001	Complement and coagulation cascades	ko04610	KOG2392(V)(Serpin)	gnl|BL_ORD_ID|45034;sp|Q6P734|IC1_RAT;sp|P05155|IC1_HUMAN	sp|P05155|IC1_HUMAN Plasma protease C1 inhibitor OS=Homo sapiens GN=SERPING1 PE=1 SV=2;sp|Q6P734|IC1_RAT Plasma protease C1 inhibitor OS=Rattus norvegicus GN=Serping1 PE=2 SV=1;sp|P05155|IC1_HUMAN Plasma protease C1 inhibitor OS=Homo sapiens GN=SERPING1 PE=1 SV=2
SUCLG1	1.88846	1.84621	1.75762	1.61584	1.65715	1.79085	2.03064	1.98914	1.89597	2.00488	1.89647	1.83866	1.81915	1.99167	2.05877	1.89421	1.86999	1.94394	PREDICTED: succinyl-CoA ligase [ADP/GDP-forming] subunit alpha, mitochondrial [Pelodiscus sinensis]	-	-	K01899	LSC1	http://www.genome.jp/dbget-bin/www_bget?ko:K01899	Citrate cycle (TCA cycle);Propanoate metabolism;Carbon metabolism	ko00020,ko00640,ko01200	KOG1255(C)(Succinyl-CoA synthetase, alpha subunit)	sp|O19069|SUCA_PIG;gnl|BL_ORD_ID|208733;sp|Q9YGD2|SUCA_COLLI	sp|O19069|SUCA_PIG Succinate--CoA ligase [ADP/GDP-forming] subunit alpha, mitochondrial OS=Sus scrofa GN=SUCLG1 PE=1 SV=2;sp|Q9YGD2|SUCA_COLLI Succinate--CoA ligase [ADP/GDP-forming] subunit alpha, mitochondrial (Fragment) OS=Columba livia GN=SUCLG1 PE=1 SV=1;sp|Q9YGD2|SUCA_COLLI Succinate--CoA ligase [ADP/GDP-forming] subunit alpha, mitochondrial (Fragment) OS=Columba livia GN=SUCLG1 PE=1 SV=1
SUCLG2	1.65215	1.61204	1.6582	1.41731	1.60487	1.52362	1.94017	1.86392	1.81251	1.91046	1.89154	1.81151	1.64856	1.91892	1.86177	1.59737	1.75051	1.7332	PREDICTED: succinyl-CoA ligase [GDP-forming] subunit beta, mitochondrial isoform X1 [Pelodiscus sinensis];PREDICTED: succinyl-CoA ligase [GDP-forming] subunit beta, mitochondrial isoform X2 [Pelodiscus sinensis]	GO:0008152;GO:0003824;GO:0005524;GO:0005739;GO:0005886;GO:0000166;GO:0016874;GO:0005815;GO:0005634;GO:0046872	metabolic process;catalytic activity;ATP binding;mitochondrion;plasma membrane;nucleotide binding;ligase activity;microtubule organizing center;nucleus;metal ion binding	K01900	LSC2	http://www.genome.jp/dbget-bin/www_bget?ko:K01900	Citrate cycle (TCA cycle);Propanoate metabolism;Carbon metabolism	ko00020,ko00640,ko01200	KOG1447(C)(GTP-specific succinyl-CoA synthetase, beta subunit)	sp|P53590|SUCB2_PIG;sp|Q9YI36|SUCB2_COLLI;gnl|BL_ORD_ID|209656	sp|P53590|SUCB2_PIG Succinate--CoA ligase [GDP-forming] subunit beta, mitochondrial (Fragment) OS=Sus scrofa GN=SUCLG2 PE=1 SV=2;sp|Q9YI36|SUCB2_COLLI Succinate--CoA ligase [GDP-forming] subunit beta, mitochondrial (Fragment) OS=Columba livia GN=SUCLG2 PE=1 SV=1;sp|Q9YI36|SUCB2_COLLI Succinate--CoA ligase [GDP-forming] subunit beta, mitochondrial (Fragment) OS=Columba livia GN=SUCLG2 PE=1 SV=1
RASD1	1.25455	1.27738	1.22011	1.41896	1.43152	1.26031	1.42991	1.40123	1.68269	1.83161	1.87772	1.57101	2.2997	2.21964	2.46969	2.38648	2.28158	2.50586	PREDICTED: dexamethasone-induced Ras-related protein 1 [Pelodiscus sinensis]	GO:0007264;GO:0016529;GO:0016020;GO:0007165;GO:0000166;GO:0005525	small GTPase mediated signal transduction;sarcoplasmic reticulum;membrane;signal transduction;nucleotide binding;GTP binding	K07843	RASD1	http://www.genome.jp/dbget-bin/www_bget?ko:K07843	Circadian entrainment	ko04713	KOG0395(R)(Ras-related GTPase)	sp|Q9JKF8|RASD1_RAT;gnl|BL_ORD_ID|154478	sp|Q9JKF8|RASD1_RAT Dexamethasone-induced Ras-related protein 1 OS=Rattus norvegicus GN=Rasd1 PE=1 SV=1;sp|Q9JKF8|RASD1_RAT Dexamethasone-induced Ras-related protein 1 OS=Rattus norvegicus GN=Rasd1 PE=1 SV=1
CMBL	1.37162	1.38489	1.3707	1.2393	1.39111	1.27807	1.7512	1.74842	1.61289	1.79337	1.6852	1.58557	1.75389	2.03814	2.00389	1.79796	1.71408	1.7485	PREDICTED: carboxymethylenebutenolidase homolog [Pelodiscus sinensis]<>XP_006111105.1 PREDICTED: carboxymethylenebutenolidase homolog [Pelodiscus sinensis]<>XP_014427178.1 PREDICTED: carboxymethylenebutenolidase homolog [Pelodiscus sinensis];PREDICTED: carboxymethylenebutenolidase homolog isoform X1 [Pelodiscus sinensis]	GO:0016787	hydrolase activity	K01061	E3.1.1.45	http://www.genome.jp/dbget-bin/www_bget?ko:K01061	Chlorocyclohexane and chlorobenzene degradation;Fluorobenzoate degradation;Toluene degradation	ko00361,ko00364,ko00623	-	sp|Q5XH09|CMBL_XENLA;gnl|BL_ORD_ID|333627	sp|Q5XH09|CMBL_XENLA Carboxymethylenebutenolidase homolog OS=Xenopus laevis GN=cmbl PE=2 SV=1;sp|Q5XH09|CMBL_XENLA Carboxymethylenebutenolidase homolog OS=Xenopus laevis GN=cmbl PE=2 SV=1
GSK3A	1.4915	1.34498	1.49304	1.94557	1.86688	1.86439	1.64933	1.58715	1.64748	1.56773	1.6602	1.60627	1.6467	1.72705	1.74013	1.77012	1.66011	1.70303	PREDICTED: glycogen synthase kinase-3 alpha, partial [Pelodiscus sinensis]	GO:0004672;GO:0005524;GO:0004674;GO:0016310;GO:0016301;GO:0000166;GO:0006468	protein kinase activity;ATP binding;protein serine/threonine kinase activity;phosphorylation;kinase activity;nucleotide binding;protein phosphorylation	K08822	GSK3A	http://www.genome.jp/dbget-bin/www_bget?ko:K08822	Chemokine signaling pathway;Dopaminergic synapse	ko04062,ko04728	KOG0658(G)(Glycogen synthase kinase-3)	sp|P18265|GSK3A_RAT;sp|Q9WV60|GSK3B_MOUSE;gnl|BL_ORD_ID|32688;sp|Q9U2Q9|GSK3_CAEEL	sp|P18265|GSK3A_RAT Glycogen synthase kinase-3 alpha OS=Rattus norvegicus GN=Gsk3a PE=1 SV=1;sp|Q9WV60|GSK3B_MOUSE Glycogen synthase kinase-3 beta OS=Mus musculus GN=Gsk3b PE=1 SV=2;sp|P18265|GSK3A_RAT Glycogen synthase kinase-3 alpha OS=Rattus norvegicus GN=Gsk3a PE=1 SV=1;sp|Q9U2Q9|GSK3_CAEEL Glycogen synthase kinase-3 OS=Caenorhabditis elegans GN=gsk-3 PE=1 SV=1
PCNA	2.41476	2.35096	2.26102	2.47385	2.38313	2.44434	2.24507	2.33163	2.32666	2.26304	2.26858	2.34858	1.82079	1.88508	1.80632	1.77952	1.85649	1.90173	PREDICTED: proliferating cell nuclear antigen [Chrysemys picta bellii]<>XP_006110851.1 PREDICTED: proliferating cell nuclear antigen [Pelodiscus sinensis]	GO:0000784;GO:0006260;GO:0006275;GO:0070182;GO:0005737;GO:0000701;GO:0034644;GO:0032405;GO:0003682;GO:0045739;GO:0070062;GO:0005654;GO:0043626;GO:0042802;GO:0045740;GO:0032139;GO:0019985;GO:0003677;GO:0030337;GO:0043596;GO:0070557;GO:0005634;GO:0006298;GO:0005813;GO:0030971;GO:0032077;GO:0035035;GO:0030855	nuclear chromosome, telomeric region;DNA replication;regulation of DNA replication;DNA polymerase binding;cytoplasm;purine-specific mismatch base pair DNA N-glycosylase activity;cellular response to UV;MutLalpha complex binding;chromatin binding;positive regulation of DNA repair;extracellular exosome;nucleoplasm;PCNA complex;identical protein binding;positive regulation of DNA replication;dinucle…	K04802	PCNA	http://www.genome.jp/dbget-bin/www_bget?ko:K04802	Cell cycle;Tight junction;Base excision repair;DNA replication;Mismatch repair;Nucleotide excision repair	ko04110,ko04530,ko03410,ko03030,ko03430,ko03420	KOG1636(L)(DNA polymerase delta processivity factor (proliferating cell nuclear antigen))	gnl|BL_ORD_ID|126361	sp|Q9DEA3|PCNA_CHICK Proliferating cell nuclear antigen OS=Gallus gallus GN=PCNA PE=1 SV=1
MCM7	1.99216	1.76253	1.87221	2.24986	2.1065	2.16104	1.81164	1.85364	1.89922	1.82769	1.86841	1.99149	1.48344	1.46835	1.5088	1.4777	1.62961	1.55352	PREDICTED: DNA replication licensing factor MCM7 [Pelodiscus sinensis]	GO:0005737;GO:0005654;GO:0004003;GO:0042325;GO:0003677;GO:0005524;GO:0006260;GO:0003678;GO:0004386;GO:0008283;GO:0006974;GO:0016020;GO:0006268;GO:0000166;GO:0071466;GO:0000784;GO:0003697;GO:0016787;GO:0042555;GO:0006270;GO:0005634	cytoplasm;nucleoplasm;ATP-dependent DNA helicase activity;regulation of phosphorylation;DNA binding;ATP binding;DNA replication;DNA helicase activity;helicase activity;cell proliferation;cellular response to DNA damage stimulus;membrane;DNA unwinding involved in DNA replication;nucleotide binding;cellular response to xenobiotic stimulus;nuclear chromosome, telomeric region;single-stranded DNA bin…	K02210	MCM7,CDC47	http://www.genome.jp/dbget-bin/www_bget?ko:K02210	Cell cycle;Cell cycle - yeast;Meiosis - yeast;DNA replication	ko04110,ko04111,ko04113,ko03030	KOG0482(L)(DNA replication licensing factor, MCM7 component)	gnl|BL_ORD_ID|80756	sp|Q3ZBH9|MCM7_BOVIN DNA replication licensing factor MCM7 OS=Bos taurus GN=MCM7 PE=2 SV=1
LOC102446420	2.13232	2.08579	2.0743	2.39356	2.48304	2.38718	2.29566	2.2399	2.3927	2.26427	2.22832	2.2513	2.21506	2.37495	2.25428	2.3035	2.30417	2.19678	PREDICTED: serine/threonine-protein phosphatase 2A 65 kDa regulatory subunit A alpha isoform-like, partial [Pelodiscus sinensis]	-	-	K03456	PPP2R1	http://www.genome.jp/dbget-bin/www_bget?ko:K03456	Cell cycle - yeast;Meiosis - yeast;Oocyte meiosis;Tight junction;AMPK signaling pathway;Hippo signaling pathway;Hippo signaling pathway -fly;PI3K-Akt signaling pathway;Sphingolipid signaling pathway;TGF-beta signaling pathway;mRNA surveillance pathway;Adrenergic signaling in cardiomyocytes;Dopaminergic synapse;Long-term depression	ko04111,ko04113,ko04114,ko04530,ko04152,ko04390,ko04391,ko04151,ko04071,ko04350,ko03015,ko04261,ko04728,ko04730	KOG0211(T)(Protein phosphatase 2A regulatory subunit A and related proteins)	sp|Q32PI5|2AAA_BOVIN;gnl|BL_ORD_ID|262865	sp|Q32PI5|2AAA_BOVIN Serine/threonine-protein phosphatase 2A 65 kDa regulatory subunit A alpha isoform OS=Bos taurus GN=PPP2R1A PE=1 SV=1;sp|Q32PI5|2AAA_BOVIN Serine/threonine-protein phosphatase 2A 65 kDa regulatory subunit A alpha isoform OS=Bos taurus GN=PPP2R1A PE=1 SV=1
CDKN1C	1.57519	1.26174	1.50866	2.16002	2.1482	1.9508	2.07849	2.07332	2.12172	2.12241	2.19507	2.14774	1.61416	1.94709	1.96932	1.95124	1.97539	2.05123	PREDICTED: cyclin-dependent kinase inhibitor 1C, partial [Pelodiscus sinensis]	-	-	K09993	CDKN1C,P57,KIP2	http://www.genome.jp/dbget-bin/www_bget?ko:K09993	Cell cycle	ko04110	-	gnl|BL_ORD_ID|335229;sp|P49918|CDN1C_HUMAN	sp|P49918|CDN1C_HUMAN Cyclin-dependent kinase inhibitor 1C OS=Homo sapiens GN=CDKN1C PE=1 SV=1;sp|P49918|CDN1C_HUMAN Cyclin-dependent kinase inhibitor 1C OS=Homo sapiens GN=CDKN1C PE=1 SV=1
ATP1B1	2.49415	2.47732	2.07155	2.20946	2.40574	2.42455	2.89563	2.79053	2.75538	2.87778	2.78819	2.73663	2.63941	2.86032	2.76109	2.77982	2.51945	2.69627	PREDICTED: sodium/potassium-transporting ATPase subunit beta-1 [Pelodiscus sinensis]	-	-	K01540	ATP1B	http://www.genome.jp/dbget-bin/www_bget?ko:K01540	cAMP signaling pathway;cGMP - PKG signaling pathway;Adrenergic signaling in cardiomyocytes;Cardiac muscle contraction;Bile secretion;Carbohydrate digestion and absorption;Gastric acid secretion;Mineral absorption;Pancreatic secretion;Protein digestion and absorption;Salivary secretion;Insulin secretion;Thyroid hormone signaling pathway;Thyroid hormone synthesis;Aldosterone-regulated sodium reabso…	ko04024,ko04022,ko04261,ko04260,ko04976,ko04973,ko04971,ko04978,ko04972,ko04974,ko04970,ko04911,ko04919,ko04918,ko04960,ko04961,ko04964	KOG3927(P)(Na+/K+ ATPase, beta subunit)	gnl|BL_ORD_ID|286766;sp|P08251|AT1B1_CHICK	sp|P08251|AT1B1_CHICK Sodium/potassium-transporting ATPase subunit beta-1 OS=Gallus gallus GN=ATP1B1 PE=1 SV=1;sp|P08251|AT1B1_CHICK Sodium/potassium-transporting ATPase subunit beta-1 OS=Gallus gallus GN=ATP1B1 PE=1 SV=1
SLC10A2	1.84856	1.88689	1.90907	1.32695	1.69346	1.6097	2.11975	2.03579	2.08483	2.06826	1.94792	1.95985	1.76035	2.34616	2.11207	1.78247	2.01123	2.14461	PREDICTED: ileal sodium/bile acid cotransporter [Pelodiscus sinensis]	-	-	K14342	SLC10A2,ASBT	http://www.genome.jp/dbget-bin/www_bget?ko:K14342	Bile secretion	ko04976	KOG2718(P)(Na+-bile acid cotransporter)	gnl|BL_ORD_ID|426678;sp|Q12908|NTCP2_HUMAN	sp|Q28727|NTCP2_RABIT Ileal sodium/bile acid cotransporter OS=Oryctolagus cuniculus GN=SLC10A2 PE=2 SV=1;sp|Q12908|NTCP2_HUMAN Ileal sodium/bile acid cotransporter OS=Homo sapiens GN=SLC10A2 PE=1 SV=2
XRCC1	1.46776	1.37803	1.41481	1.94473	1.90374	1.89237	1.61794	1.69548	1.74241	1.6909	1.74273	1.78118	1.75374	1.73719	1.74881	1.78433	1.74296	1.80024	PREDICTED: DNA repair protein XRCC1, partial [Pelodiscus sinensis]	GO:0000012;GO:0003684;GO:0006284;GO:0005634	single strand break repair;damaged DNA binding;base-excision repair;nucleus	K10803	XRCC1	http://www.genome.jp/dbget-bin/www_bget?ko:K10803	Base excision repair	ko03410	-	sp|Q9ESZ0|XRCC1_RAT;gnl|BL_ORD_ID|518204;sp|Q60596|XRCC1_MOUSE	sp|Q9ESZ0|XRCC1_RAT DNA repair protein XRCC1 OS=Rattus norvegicus GN=Xrcc1 PE=1 SV=2;sp|Q9ESZ0|XRCC1_RAT DNA repair protein XRCC1 OS=Rattus norvegicus GN=Xrcc1 PE=1 SV=2;sp|Q60596|XRCC1_MOUSE DNA repair protein XRCC1 OS=Mus musculus GN=Xrcc1 PE=1 SV=2
GTF2F1	1.74437	1.55775	1.5605	2.0393	1.97387	1.97727	1.75838	1.78362	1.92241	1.78111	1.91498	1.90677	1.50079	1.4682	1.53945	1.48073	1.57206	1.57921	PREDICTED: general transcription factor IIF subunit 1 [Pelodiscus sinensis]	GO:0003824;GO:0045944;GO:0003677;GO:0043231;GO:0009615;GO:0008134;GO:0030054;GO:0032968;GO:0044822;GO:0006367;GO:0019211;GO:0043085;GO:0005634	catalytic activity;positive regulation of transcription from RNA polymerase II promoter;DNA binding;intracellular membrane-bounded organelle;response to virus;transcription factor binding;cell junction;positive regulation of transcription elongation from RNA polymerase II promoter;RNA binding;transcription initiation from RNA polymerase II promoter;phosphatase activator activity;positive regulati…	K03138	TFIIF1,GTF2F1,TFG1	http://www.genome.jp/dbget-bin/www_bget?ko:K03138	Basal transcription factors	ko03022	KOG2393(K)(Transcription initiation factor IIF, large subunit (RAP74))	gnl|BL_ORD_ID|505836;sp|P35269|T2FA_HUMAN;sp|Q5EA53|T2FA_BOVIN	sp|Q5EA53|T2FA_BOVIN General transcription factor IIF subunit 1 OS=Bos taurus GN=GTF2F1 PE=2 SV=1;sp|P35269|T2FA_HUMAN General transcription factor IIF subunit 1 OS=Homo sapiens GN=GTF2F1 PE=1 SV=2;sp|Q5EA53|T2FA_BOVIN General transcription factor IIF subunit 1 OS=Bos taurus GN=GTF2F1 PE=2 SV=1
TAF6	1.9433	1.82497	1.95376	2.33754	2.28468	2.23104	2.03719	1.99335	2.07471	1.9653	2.08149	1.98807	2.11079	2.06006	2.14205	2.19223	2.17757	2.1623	PREDICTED: LOW QUALITY PROTEIN: transcription initiation factor TFIID subunit 6 [Pelodiscus sinensis]	GO:0005737;GO:0008285;GO:0003677;GO:0051090;GO:0046982;GO:0033276;GO:0005669;GO:0071339;GO:0045786;GO:0006352;GO:0003700;GO:0006367;GO:0006355;GO:0005634	cytoplasm;negative regulation of cell proliferation;DNA binding;regulation of sequence-specific DNA binding transcription factor activity;protein heterodimerization activity;transcription factor TFTC complex;transcription factor TFIID complex;MLL1 complex;negative regulation of cell cycle;DNA-templated transcription, initiation;transcription factor activity, sequence-specific DNA binding;transcri…	K03131	TAF6	http://www.genome.jp/dbget-bin/www_bget?ko:K03131	Basal transcription factors	ko03022	KOG2549(K)(Transcription initiation factor TFIID, subunit TAF6 (also component of histone acetyltransferase SAGA))	sp|Q62311|TAF6_MOUSE;gnl|BL_ORD_ID|514687	sp|Q62311|TAF6_MOUSE Transcription initiation factor TFIID subunit 6 OS=Mus musculus GN=Taf6 PE=1 SV=1;sp|Q62311|TAF6_MOUSE Transcription initiation factor TFIID subunit 6 OS=Mus musculus GN=Taf6 PE=1 SV=1
LOC102448693	1.58331	1.70467	1.93024	1.60097	1.85992	1.7545	1.91206	1.94586	1.98168	2.22693	2.08185	1.87875	2.25907	2.35093	2.10298	2.20588	2.14554	2.36541	PREDICTED: zona pellucida sperm-binding protein 3 receptor-like isoform X1 [Pelodiscus sinensis];PREDICTED: C4b-binding protein alpha chain-like isoform X2 [Pelodiscus sinensis]	-	-	K04012	CR2,CD21	http://www.genome.jp/dbget-bin/www_bget?ko:K04012	B cell receptor signaling pathway;Complement and coagulation cascades;Hematopoietic cell lineage	ko04662,ko04610,ko04640	-	sp|P26644|APOH_RAT;sp|Q60401|DAF_CAVPO;gnl|BL_ORD_ID|348394;gnl|BL_ORD_ID|285681	sp|P26644|APOH_RAT Beta-2-glycoprotein 1 OS=Rattus norvegicus GN=Apoh PE=2 SV=2;sp|Q60401|DAF_CAVPO Complement decay-accelerating factor OS=Cavia porcellus GN=CD55 PE=2 SV=1;sp|Q60401|DAF_CAVPO Complement decay-accelerating factor OS=Cavia porcellus GN=CD55 PE=2 SV=1;sp|P26644|APOH_RAT Beta-2-glycoprotein 1 OS=Rattus norvegicus GN=Apoh PE=2 SV=2
VAMP8	1.65234	1.57229	1.64078	2.11368	2.21606	2.1329	2.14154	2.21783	2.18415	2.1518	2.20485	2.19761	2.4219	2.34185	2.45732	2.4658	2.30797	2.42442	PREDICTED: vesicle-associated membrane protein 8 [Pelodiscus sinensis];PREDICTED: vesicle-associated membrane protein 8 [Chelonia mydas]	-	-	K08512	VAMP8	http://www.genome.jp/dbget-bin/www_bget?ko:K08512	Autophagy - animal;SNARE interactions in vesicular transport;Platelet activation	ko04140,ko04130,ko04611	KOG0860(U)(Synaptobrevin/VAMP-like protein)	gnl|BL_ORD_ID|247003;sp|Q9WUF4|VAMP8_RAT	sp|Q9WUF4|VAMP8_RAT Vesicle-associated membrane protein 8 OS=Rattus norvegicus GN=Vamp8 PE=1 SV=1;sp|Q9WUF4|VAMP8_RAT Vesicle-associated membrane protein 8 OS=Rattus norvegicus GN=Vamp8 PE=1 SV=1
LAMP1	2.15421	2.23269	2.08167	1.96118	1.94812	2.0146	2.25464	2.23495	2.24242	2.27556	2.19789	2.15939	2.12863	2.17316	2.12882	2.09999	2.0596	2.14563	PREDICTED: lysosome-associated membrane glycoprotein 1 [Pelodiscus sinensis]	GO:0009897;GO:0005737;GO:0008021;GO:0005886;GO:0090160;GO:0044194;GO:0008626;GO:0061474;GO:1902513;GO:0050821;GO:0016020;GO:0072594;GO:0045954;GO:0042383;GO:0031982;GO:0043323;GO:0009986;GO:0019904;GO:0019899	external side of plasma membrane;cytoplasm;synaptic vesicle;plasma membrane;Golgi to lysosome transport;cytolytic granule;granzyme-mediated apoptotic signaling pathway;phagolysosome membrane;regulation of organelle transport along microtubule;protein stabilization;membrane;establishment of protein localization to organelle;positive regulation of natural killer cell mediated cytotoxicity;sarcolemm…	K06528	LAMP1_2,CD107	http://www.genome.jp/dbget-bin/www_bget?ko:K06528	Autophagy - animal;Lysosome;Phagosome	ko04140,ko04142,ko04145	-	sp|P05300|LAMP1_CHICK;gnl|BL_ORD_ID|71083	sp|P05300|LAMP1_CHICK Lysosome-associated membrane glycoprotein 1 OS=Gallus gallus GN=LAMP1 PE=2 SV=1;sp|P05300|LAMP1_CHICK Lysosome-associated membrane glycoprotein 1 OS=Gallus gallus GN=LAMP1 PE=2 SV=1
RAB7A	1.92526	1.95871	1.85455	1.87058	1.84924	1.94374	2.1502	2.13758	2.06737	2.11448	2.05362	2.08304	1.92819	2.15643	2.06487	1.92392	1.97795	2.04887	PREDICTED: ras-related protein Rab-7a [Pelodiscus sinensis]	GO:0030904;GO:0005737;GO:0006914;GO:0015031;GO:0005765;GO:0070062;GO:1902583;GO:0019003;GO:0031902;GO:0003924;GO:0010008;GO:1903543;GO:0090385;GO:0090383;GO:0007264;GO:0008333;GO:0006810;GO:2000785;GO:0042147;GO:0019886;GO:0034045;GO:0005768;GO:0016042;GO:0061724;GO:0022615;GO:0005829;GO:1905394;GO:0019076;GO:0016020;GO:0048365;GO:0005764;GO:1903542;GO:0006629;GO:0005770;GO:0000166;GO:0043231;GO:…	retromer complex;cytoplasm;autophagy;protein transport;lysosomal membrane;extracellular exosome;multi-organism intracellular transport;GDP binding;late endosome membrane;GTPase activity;endosome membrane;positive regulation of exosomal secretion;phagosome-lysosome fusion;phagosome acidification;small GTPase mediated signal transduction;endosome to lysosome transport;transport;regulation of autoph…	K07897	RAB7A	http://www.genome.jp/dbget-bin/www_bget?ko:K07897	Autophagy - animal;Autophagy - yeast;Endocytosis;Mitophagy - animal;Phagosome	ko04140,ko04138,ko04144,ko04137,ko04145	KOG0394(R)(Ras-related GTPase)	gnl|BL_ORD_ID|153707;sp|P51149|RAB7A_HUMAN;sp|P51150|RAB7A_MOUSE	sp|P51149|RAB7A_HUMAN Ras-related protein Rab-7a OS=Homo sapiens GN=RAB7A PE=1 SV=1;sp|P51149|RAB7A_HUMAN Ras-related protein Rab-7a OS=Homo sapiens GN=RAB7A PE=1 SV=1;sp|P51150|RAB7A_MOUSE Ras-related protein Rab-7a OS=Mus musculus GN=Rab7a PE=1 SV=2
RPS6KB2	1.50907	1.37328	1.43759	1.79421	1.83828	1.75534	1.86859	1.82295	1.86237	1.88041	1.94463	1.86976	1.94512	2.17035	2.11478	1.92392	1.91656	1.99878	PREDICTED: ribosomal protein S6 kinase beta-2 isoform X1 [Pelodiscus sinensis];PREDICTED: ribosomal protein S6 kinase beta-2 isoform X2 [Meleagris gallopavo]<>XP_019467167.1 PREDICTED: ribosomal protein S6 kinase beta-2 isoform X2 [Meleagris gallopavo];PREDICTED: ribosomal protein S6 kinase beta-2 isoform X2 [Pelodiscus sinensis]	-	-	K04688	RPS6KB	http://www.genome.jp/dbget-bin/www_bget?ko:K04688	Autophagy - animal;AMPK signaling pathway;Apelin signaling pathway;ErbB signaling pathway;HIF-1 signaling pathway;PI3K-Akt signaling pathway;TGF-beta signaling pathway;mTOR signaling pathway;Longevity regulating pathway - mammal;Longevity regulating pathway - multiple species;Longevity regulating pathway - worm;Insulin signaling pathway;Fc gamma R-mediated phagocytosis	ko04140,ko04152,ko04371,ko04012,ko04066,ko04151,ko04350,ko04150,ko04211,ko04213,ko04212,ko04910,ko04666	KOG0603(T)(Ribosomal protein S6 kinase)	gnl|BL_ORD_ID|65757;sp|Q9UBS0|KS6B2_HUMAN	sp|Q9UBS0|KS6B2_HUMAN Ribosomal protein S6 kinase beta-2 OS=Homo sapiens GN=RPS6KB2 PE=1 SV=2;sp|Q9UBS0|KS6B2_HUMAN Ribosomal protein S6 kinase beta-2 OS=Homo sapiens GN=RPS6KB2 PE=1 SV=2
LOC102460485	1.45133	1.36135	1.44091	1.99852	1.93008	1.80468	1.77327	1.8311	1.86386	1.71483	1.83998	1.72989	1.81471	1.68681	1.67925	1.98385	1.90439	1.91403	PREDICTED: death-associated protein kinase 2-like isoform X2 [Pelodiscus sinensis];PREDICTED: death-associated protein kinase 2-like isoform X1 [Pelodiscus sinensis]<>XP_014424432.1 PREDICTED: death-associated protein kinase 2-like isoform X1 [Pelodiscus sinensis]	GO:0004672;GO:0005524;GO:0000166;GO:0004674;GO:0016310;GO:0016301;GO:0006468;GO:0016740	protein kinase activity;ATP binding;nucleotide binding;protein serine/threonine kinase activity;phosphorylation;kinase activity;protein phosphorylation;transferase activity	K08803	DAPK	http://www.genome.jp/dbget-bin/www_bget?ko:K08803	Autophagy - animal	ko04140	KOG0032(T)(Ca2+/calmodulin-dependent protein kinase, EF-Hand protein superfamily);KOG0613(Z)(Projectin/twitchin and related proteins)	sp|Q8VDF3|DAPK2_MOUSE;gnl|BL_ORD_ID|348576;sp|Q9UIK4|DAPK2_HUMAN	sp|Q8VDF3|DAPK2_MOUSE Death-associated protein kinase 2 OS=Mus musculus GN=Dapk2 PE=1 SV=1;sp|Q8VDF3|DAPK2_MOUSE Death-associated protein kinase 2 OS=Mus musculus GN=Dapk2 PE=1 SV=1;sp|Q9UIK4|DAPK2_HUMAN Death-associated protein kinase 2 OS=Homo sapiens GN=DAPK2 PE=1 SV=1
LOC102443979	2.53272	2.27873	2.44518	1.8264	2.41017	1.99304	2.79842	2.78543	2.52167	2.73218	2.56591	2.55763	2.4852	2.98513	3.00176	2.26349	2.61334	2.6105	PREDICTED: UDP-glucuronosyltransferase 1-1 isoform X8 [Pelodiscus sinensis];PREDICTED: UDP-glucuronosyltransferase 1-1 isoform X3 [Pelodiscus sinensis];PREDICTED: UDP-glucuronosyltransferase 1-1 isoform X7 [Pelodiscus sinensis];PREDICTED: UDP-glucuronosyltransferase 1-1 isoform X2 [Pelodiscus sinensis];PREDICTED: UDP-glucuronosyltransferase 1-9 isoform X5 [Pelodiscus sinensis];PREDICTED: UDP-gluc…	GO:0070062;GO:0008152;GO:0016758;GO:0015020;GO:0016740;GO:0046982;GO:0016021;GO:0016020;GO:0042803;GO:0052695;GO:0016757;GO:0005783;GO:0006805;GO:0016999;GO:0019899	extracellular exosome;metabolic process;transferase activity, transferring hexosyl groups;glucuronosyltransferase activity;transferase activity;protein heterodimerization activity;integral component of membrane;membrane;protein homodimerization activity;cellular glucuronidation;transferase activity, transferring glycosyl groups;endoplasmic reticulum;xenobiotic metabolic process;antibiotic metabol…	K00699	UGT	http://www.genome.jp/dbget-bin/www_bget?ko:K00699	Ascorbate and aldarate metabolism;Pentose and glucuronate interconversions;Steroid hormone biosynthesis;Porphyrin and chlorophyll metabolism;Retinol metabolism;Drug metabolism - cytochrome P450;Drug metabolism - other enzymes;Metabolism of xenobiotics by cytochrome P450	ko00053,ko00040,ko00140,ko00860,ko00830,ko00982,ko00983,ko00980	-	gnl|BL_ORD_ID|243119;gnl|BL_ORD_ID|243121;gnl|BL_ORD_ID|234544;gnl|BL_ORD_ID|237889;sp|Q64550|UD11_RAT	sp|Q64550|UD11_RAT UDP-glucuronosyltransferase 1-1 OS=Rattus norvegicus GN=Ugt1a1 PE=1 SV=1;sp|P19224|UD16_HUMAN UDP-glucuronosyltransferase 1-6 OS=Homo sapiens GN=UGT1A6 PE=1 SV=2;sp|P22309|UD11_HUMAN UDP-glucuronosyltransferase 1-1 OS=Homo sapiens GN=UGT1A1 PE=1 SV=1;sp|O60656|UD19_HUMAN UDP-glucuronosyltransferase 1-9 OS=Homo sapiens GN=UGT1A9 PE=1 SV=1;sp|Q64550|UD11_RAT UDP-glucuronosyltrans…
LOC102452718	2.79781	2.65937	2.83259	2.89357	3.01043	3.19832	3.19742	3.0459	3.14693	3.07533	3.03765	3.11673	3.1437	3.28665	3.38479	2.98614	3.22108	3.21189	PREDICTED: L-gulonolactone oxidase-like, partial [Pelodiscus sinensis]	GO:0050105;GO:0003824;GO:0050660;GO:0016614;GO:0016899;GO:0016021;GO:0016020;GO:0031090;GO:0005789;GO:0055114;GO:0016491;GO:0003885;GO:0019853	L-gulonolactone oxidase activity;catalytic activity;flavin adenine dinucleotide binding;oxidoreductase activity, acting on CH-OH group of donors;oxidoreductase activity, acting on the CH-OH group of donors, oxygen as acceptor;integral component of membrane;membrane;organelle membrane;endoplasmic reticulum membrane;oxidation-reduction process;oxidoreductase activity;D-arabinono-1,4-lactone oxidase…	K00103	GULO	http://www.genome.jp/dbget-bin/www_bget?ko:K00103	Ascorbate and aldarate metabolism	ko00053	KOG4730(V)(D-arabinono-1, 4-lactone oxidase)	sp|Q3ZC33|GGLO_BOVIN;sp|P10867|GGLO_RAT;gnl|BL_ORD_ID|22891	sp|Q3ZC33|GGLO_BOVIN L-gulonolactone oxidase OS=Bos taurus GN=GULO PE=2 SV=3;sp|P10867|GGLO_RAT L-gulonolactone oxidase OS=Rattus norvegicus GN=Gulo PE=1 SV=3;sp|P10867|GGLO_RAT L-gulonolactone oxidase OS=Rattus norvegicus GN=Gulo PE=1 SV=3
ALDH2	2.15183	1.96609	2.09075	1.69002	1.81298	1.54876	2.28865	2.26668	2.12778	2.21722	1.86433	1.85309	2.01986	2.47222	2.50931	1.57967	1.83746	1.71684	PREDICTED: aldehyde dehydrogenase, mitochondrial [Pelodiscus sinensis]	GO:0006066;GO:0006068;GO:0070062;GO:0008152;GO:0005975;GO:0005739;GO:0004030;GO:0016620;GO:0009055;GO:0005759;GO:0055114;GO:0016491;GO:0006069;GO:0004029	alcohol metabolic process;ethanol catabolic process;extracellular exosome;metabolic process;carbohydrate metabolic process;mitochondrion;aldehyde dehydrogenase [NAD(P)+] activity;oxidoreductase activity, acting on the aldehyde or oxo group of donors, NAD or NADP as acceptor;electron carrier activity;mitochondrial matrix;oxidation-reduction process;oxidoreductase activity;ethanol oxidation;aldehyd…	K00128	E1.2.1.3	http://www.genome.jp/dbget-bin/www_bget?ko:K00128	Arginine and proline metabolism;Histidine metabolism;Lysine degradation;Tryptophan metabolism;Valine, leucine and isoleucine degradation;Ascorbate and aldarate metabolism;Glycolysis / Gluconeogenesis;Pyruvate metabolism;Fatty acid degradation;Glycerolipid metabolism;beta-Alanine metabolism;Insect hormone biosynthesis;Limonene and pinene degradation;Chloroalkane and chloroalkene degradation	ko00330,ko00340,ko00310,ko00380,ko00280,ko00053,ko00010,ko00620,ko00071,ko00561,ko00410,ko00981,ko00903,ko00625	KOG2450(C)(Aldehyde dehydrogenase)	sp|P11884|ALDH2_RAT;gnl|BL_ORD_ID|272069	sp|P11884|ALDH2_RAT Aldehyde dehydrogenase, mitochondrial OS=Rattus norvegicus GN=Aldh2 PE=1 SV=1;sp|P11884|ALDH2_RAT Aldehyde dehydrogenase, mitochondrial OS=Rattus norvegicus GN=Aldh2 PE=1 SV=1
ALDH3A2	1.67861	1.68797	1.62014	1.6994	1.71341	1.68699	1.7829	1.82354	1.79782	1.83033	1.91238	1.84086	1.76103	1.88891	1.84997	1.68485	1.86552	1.8177	PREDICTED: fatty aldehyde dehydrogenase, partial [Pelodiscus sinensis]	-	-	K00128	E1.2.1.3	http://www.genome.jp/dbget-bin/www_bget?ko:K00128	Arginine and proline metabolism;Histidine metabolism;Lysine degradation;Tryptophan metabolism;Valine, leucine and isoleucine degradation;Ascorbate and aldarate metabolism;Glycolysis / Gluconeogenesis;Pyruvate metabolism;Fatty acid degradation;Glycerolipid metabolism;beta-Alanine metabolism;Insect hormone biosynthesis;Limonene and pinene degradation;Chloroalkane and chloroalkene degradation	ko00330,ko00340,ko00310,ko00380,ko00280,ko00053,ko00010,ko00620,ko00071,ko00561,ko00410,ko00981,ko00903,ko00625	KOG2456(C)(Aldehyde dehydrogenase)	gnl|BL_ORD_ID|273901;sp|P51648|AL3A2_HUMAN	sp|P51648|AL3A2_HUMAN Fatty aldehyde dehydrogenase OS=Homo sapiens GN=ALDH3A2 PE=1 SV=1;sp|P51648|AL3A2_HUMAN Fatty aldehyde dehydrogenase OS=Homo sapiens GN=ALDH3A2 PE=1 SV=1
LOC102446982	1.61972	1.41747	1.3653	1.54753	1.61972	1.58737	1.83518	1.7185	1.72198	1.73568	1.758	1.65772	1.52166	2.001	2.05239	1.76982	1.8177	1.91603	PREDICTED: putative aldehyde dehydrogenase DhaS [Pelodiscus sinensis]	GO:0008152;GO:0016620;GO:0055114;GO:0016491	metabolic process;oxidoreductase activity, acting on the aldehyde or oxo group of donors, NAD or NADP as acceptor;oxidation-reduction process;oxidoreductase activity	K00128	E1.2.1.3	http://www.genome.jp/dbget-bin/www_bget?ko:K00128	Arginine and proline metabolism;Histidine metabolism;Lysine degradation;Tryptophan metabolism;Valine, leucine and isoleucine degradation;Ascorbate and aldarate metabolism;Glycolysis / Gluconeogenesis;Pyruvate metabolism;Fatty acid degradation;Glycerolipid metabolism;beta-Alanine metabolism;Insect hormone biosynthesis;Limonene and pinene degradation;Chloroalkane and chloroalkene degradation	ko00330,ko00340,ko00310,ko00380,ko00280,ko00053,ko00010,ko00620,ko00071,ko00561,ko00410,ko00981,ko00903,ko00625	KOG2450(C)(Aldehyde dehydrogenase)	gnl|BL_ORD_ID|265164	sp|A6QR56|A16A1_BOVIN Aldehyde dehydrogenase family 16 member A1 OS=Bos taurus GN=ALDH16A1 PE=2 SV=1
LOC102448543	1.67633	1.90439	1.67468	1.62221	1.67015	1.77254	1.99743	1.87921	1.80339	1.94915	1.82256	1.83372	1.79197	2.0661	2.06532	1.74099	1.86617	1.84248	PREDICTED: amine oxidase [flavin-containing] A [Pelodiscus sinensis]	GO:0005739;GO:0005741;GO:0016021;GO:0055114;GO:0016491	mitochondrion;mitochondrial outer membrane;integral component of membrane;oxidation-reduction process;oxidoreductase activity	K00274	MAO,aofH	http://www.genome.jp/dbget-bin/www_bget?ko:K00274	Arginine and proline metabolism;Glycine, serine and threonine metabolism;Histidine metabolism;Phenylalanine metabolism;Tryptophan metabolism;Tyrosine metabolism;Isoquinoline alkaloid biosynthesis;Drug metabolism - cytochrome P450;Dopaminergic synapse;Serotonergic synapse	ko00330,ko00260,ko00340,ko00360,ko00380,ko00350,ko00950,ko00982,ko04728,ko04726	KOG0029(Q)(Amine oxidase)	sp|P21397|AOFA_HUMAN;sp|Q5NU32|AOFA_HORSE;gnl|BL_ORD_ID|275245;sp|Q6PLK3|AOFB_PIG	sp|P21397|AOFA_HUMAN Amine oxidase [flavin-containing] A OS=Homo sapiens GN=MAOA PE=1 SV=1;sp|Q5NU32|AOFA_HORSE Amine oxidase [flavin-containing] A OS=Equus caballus GN=MAOA PE=2 SV=1;sp|P21397|AOFA_HUMAN Amine oxidase [flavin-containing] A OS=Homo sapiens GN=MAOA PE=1 SV=1;sp|Q6PLK3|AOFB_PIG Amine oxidase [flavin-containing] B OS=Sus scrofa GN=MAOB PE=2 SV=3
ALDH7A1	2.3697	2.35336	2.14258	2.05469	2.18239	2.29789	2.41474	2.44525	2.34945	2.43731	2.3538	2.37046	2.27775	2.54428	2.6338	2.17545	2.33676	2.46286	PREDICTED: alpha-aminoadipic semialdehyde dehydrogenase isoform X1 [Pelodiscus sinensis];PREDICTED: alpha-aminoadipic semialdehyde dehydrogenase isoform X2 [Pelodiscus sinensis];PREDICTED: alpha-aminoadipic semialdehyde dehydrogenase isoform X2 [Chelonia mydas]	GO:0005737;GO:0070062;GO:0008152;GO:0005739;GO:0004043;GO:0016620;GO:0055114;GO:0016491;GO:0004029	cytoplasm;extracellular exosome;metabolic process;mitochondrion;L-aminoadipate-semialdehyde dehydrogenase activity;oxidoreductase activity, acting on the aldehyde or oxo group of donors, NAD or NADP as acceptor;oxidation-reduction process;oxidoreductase activity;aldehyde dehydrogenase (NAD) activity	K14085	ALDH7A1	http://www.genome.jp/dbget-bin/www_bget?ko:K14085	Arginine and proline metabolism;Glycine, serine and threonine metabolism;Histidine metabolism;Lysine biosynthesis;Lysine degradation;Tryptophan metabolism;Valine, leucine and isoleucine degradation;Ascorbate and aldarate metabolism;Glycolysis / Gluconeogenesis;Pyruvate metabolism;Fatty acid degradation;Glycerolipid metabolism;beta-Alanine metabolism;Biosynthesis of amino acids	ko00330,ko00260,ko00340,ko00300,ko00310,ko00380,ko00280,ko00053,ko00010,ko00620,ko00071,ko00561,ko00410,ko01230	KOG2451(C)(Aldehyde dehydrogenase)	sp|Q2KJC9|AL7A1_BOVIN;gnl|BL_ORD_ID|276948	sp|Q2KJC9|AL7A1_BOVIN Alpha-aminoadipic semialdehyde dehydrogenase OS=Bos taurus GN=ALDH7A1 PE=2 SV=4;sp|Q2KJC9|AL7A1_BOVIN Alpha-aminoadipic semialdehyde dehydrogenase OS=Bos taurus GN=ALDH7A1 PE=2 SV=4
GAMT	2.25768	2.16932	2.30805	2.06554	2.45523	2.43054	2.73414	2.75849	2.60738	2.671	2.74291	2.73522	2.45171	2.73636	2.71315	2.44442	2.45665	2.84498	PREDICTED: guanidinoacetate N-methyltransferase [Pelodiscus sinensis]	GO:0005737;GO:0016740;GO:0046498;GO:0032259;GO:0046500;GO:0030731;GO:0008168;GO:0005634;GO:0006601	cytoplasm;transferase activity;S-adenosylhomocysteine metabolic process;methylation;S-adenosylmethionine metabolic process;guanidinoacetate N-methyltransferase activity;methyltransferase activity;nucleus;creatine biosynthetic process	K00542	GAMT	http://www.genome.jp/dbget-bin/www_bget?ko:K00542	Arginine and proline metabolism;Glycine, serine and threonine metabolism	ko00330,ko00260	KOG1709(E)(Guanidinoacetate methyltransferase and related proteins)	gnl|BL_ORD_ID|10059;sp|Q6PBF6|GAMT_XENTR	sp|Q6PBF6|GAMT_XENTR Guanidinoacetate N-methyltransferase OS=Xenopus tropicalis GN=gamt PE=2 SV=1;sp|Q6PBF6|GAMT_XENTR Guanidinoacetate N-methyltransferase OS=Xenopus tropicalis GN=gamt PE=2 SV=1
GATM	2.21911	1.97516	2.00694	1.61426	1.77764	1.65128	2.59069	2.54279	2.05239	1.94934	1.94265	1.99974	0.975432	1.85016	1.57276	0.728354	1.54158	1.42878	PREDICTED: glycine amidinotransferase, mitochondrial-like [Chelonia mydas];Glycine amidinotransferase [Chelonia mydas]	-	-	K00613	GATM	http://www.genome.jp/dbget-bin/www_bget?ko:K00613	Arginine and proline metabolism;Glycine, serine and threonine metabolism	ko00330,ko00260	-	gnl|BL_ORD_ID|10956;sp|Q9I9K9|GATM_CHICK	sp|Q9I9K9|GATM_CHICK Glycine amidinotransferase, mitochondrial OS=Gallus gallus GN=GATM PE=2 SV=2;sp|Q9I9K9|GATM_CHICK Glycine amidinotransferase, mitochondrial OS=Gallus gallus GN=GATM PE=2 SV=2
SMS	1.90714	1.93273	1.87795	1.73078	1.73933	1.92117	1.93742	1.97497	1.96308	1.93722	1.83879	1.8635	2.07943	1.97155	1.8957	1.99114	1.96904	2.00121	PREDICTED: spermine synthase, partial [Pelodiscus sinensis]	-	-	K00802	SMS	http://www.genome.jp/dbget-bin/www_bget?ko:K00802	Arginine and proline metabolism;Cysteine and methionine metabolism;Glutathione metabolism;beta-Alanine metabolism	ko00330,ko00270,ko00480,ko00410	KOG1562(E)(Spermidine synthase)	sp|P52788|SPSY_HUMAN;gnl|BL_ORD_ID|210780	sp|P52788|SPSY_HUMAN Spermine synthase OS=Homo sapiens GN=SMS PE=1 SV=2;sp|P52788|SPSY_HUMAN Spermine synthase OS=Homo sapiens GN=SMS PE=1 SV=2
AGMAT	2.22094	2.18076	2.17458	2.12212	2.3349	2.20382	2.33157	2.37218	2.41838	2.335	2.32166	2.21296	2.2414	2.44604	2.70728	2.45028	2.4468	2.58938	PREDICTED: agmatinase, mitochondrial [Pelodiscus sinensis];PREDICTED: agmatinase, mitochondrial-like [Pelodiscus sinensis]	-	-	K01480	speB	http://www.genome.jp/dbget-bin/www_bget?ko:K01480	Arginine and proline metabolism	ko00330	KOG2965(E)(Arginase);KOG2964(E)(Arginase family protein)	gnl|BL_ORD_ID|204865;sp|Q90XD2|SPEB_CHICK	sp|Q90XD2|SPEB_CHICK Agmatinase, mitochondrial OS=Gallus gallus GN=AGMAT PE=2 SV=1;sp|Q90XD2|SPEB_CHICK Agmatinase, mitochondrial OS=Gallus gallus GN=AGMAT PE=2 SV=1
LOC102457583	2.16513	1.90671	2.13123	1.81064	2.31141	2.09065	2.66976	2.55353	2.34167	2.55296	2.58629	2.29776	2.28655	2.5938	2.77311	2.22162	2.34786	2.57295	PREDICTED: cytochrome P450 2F2-like isoform X1 [Pelodiscus sinensis];PREDICTED: cytochrome P450 2C31-like isoform X2 [Pelodiscus sinensis]	GO:0004497;GO:0005506;GO:0016705;GO:0008392;GO:0016021;GO:0016020;GO:0008395;GO:0055114;GO:0016491;GO:0020037;GO:0019373;GO:0046872;GO:0016712	monooxygenase activity;iron ion binding;oxidoreductase activity, acting on paired donors, with incorporation or reduction of molecular oxygen;arachidonic acid epoxygenase activity;integral component of membrane;membrane;steroid hydroxylase activity;oxidation-reduction process;oxidoreductase activity;heme binding;epoxygenase P450 pathway;metal ion binding;oxidoreductase activity, acting on paired …	K07413	CYP2C	http://www.genome.jp/dbget-bin/www_bget?ko:K07413	Arachidonic acid metabolism;Linoleic acid metabolism;Steroid hormone biosynthesis;Retinol metabolism;Serotonergic synapse;Inflammatory mediator regulation of TRP channels	ko00590,ko00591,ko00140,ko00830,ko04726,ko04750	KOG0156(Q)(Cytochrome P450 CYP2 subfamily)	sp|P24470|CP2CN_RAT;gnl|BL_ORD_ID|319404;sp|P24461|CP2G1_RABIT;gnl|BL_ORD_ID|320044	sp|P24470|CP2CN_RAT Cytochrome P450 2C23 OS=Rattus norvegicus GN=Cyp2c23 PE=2 SV=2;sp|P00182|CP2C3_RABIT Cytochrome P450 2C3 OS=Oryctolagus cuniculus GN=CYP2C3 PE=1 SV=2;sp|P24461|CP2G1_RABIT Cytochrome P450 2G1 OS=Oryctolagus cuniculus GN=CYP2G1 PE=1 SV=1;sp|Q8WNE1|CP2F5_GORGO Cytochrome P450 2F5 OS=Gorilla gorilla gorilla GN=CYP2F5 PE=3 SV=2
GPX1	2.12463	1.97676	2.1645	2.11464	2.22152	2.18483	2.18409	2.21437	2.3228	2.2727	2.1738	2.29909	2.3166	2.36974	2.48144	2.28693	2.35551	2.27333	PREDICTED: LOW QUALITY PROTEIN: glutathione peroxidase 1 [Pelodiscus sinensis]	-	-	K00432	gpx	http://www.genome.jp/dbget-bin/www_bget?ko:K00432	Arachidonic acid metabolism;Glutathione metabolism;Thyroid hormone synthesis	ko00590,ko00480,ko04918	KOG1651(O)(Glutathione peroxidase)	gnl|BL_ORD_ID|20838;sp|P04041|GPX1_RAT	sp|P04041|GPX1_RAT Glutathione peroxidase 1 OS=Rattus norvegicus GN=Gpx1 PE=1 SV=4;sp|P04041|GPX1_RAT Glutathione peroxidase 1 OS=Rattus norvegicus GN=Gpx1 PE=1 SV=4
GPX2	1.60086	1.22634	1.73584	1.73664	1.67256	2.00766	1.28511	1.43949	1.34005	1.45469	1.25768	1.37401	1.85181	1.61553	1.8169	1.81954	1.56372	1.8635	PREDICTED: LOW QUALITY PROTEIN: glutathione peroxidase 2 [Chelonia mydas];PREDICTED: glutathione peroxidase 2 [Pelodiscus sinensis]	-	-	K00432	gpx	http://www.genome.jp/dbget-bin/www_bget?ko:K00432	Arachidonic acid metabolism;Glutathione metabolism;Thyroid hormone synthesis	ko00590,ko00480,ko04918	KOG1651(O)(Glutathione peroxidase)	gnl|BL_ORD_ID|29934;sp|P83645|GPX2_RAT	sp|Q9JHC0|GPX2_MOUSE Glutathione peroxidase 2 OS=Mus musculus GN=Gpx2 PE=2 SV=3;sp|P83645|GPX2_RAT Glutathione peroxidase 2 OS=Rattus norvegicus GN=Gpx2 PE=1 SV=3
GPX3	1.28623	1.23121	1.35276	2.09733	2.01812	1.68233	1.79148	1.81908	1.92153	1.80387	2.48048	1.94101	1.69302	1.74414	1.82827	2.26186	1.95337	2.00531	PREDICTED: glutathione peroxidase 3 [Pelodiscus sinensis]	GO:0004602;GO:0006979;GO:0055114;GO:0016491;GO:0004601	glutathione peroxidase activity;response to oxidative stress;oxidation-reduction process;oxidoreductase activity;peroxidase activity	K00432	gpx	http://www.genome.jp/dbget-bin/www_bget?ko:K00432	Arachidonic acid metabolism;Glutathione metabolism;Thyroid hormone synthesis	ko00590,ko00480,ko04918	KOG1651(O)(Glutathione peroxidase)	gnl|BL_ORD_ID|20401;sp|P46412|GPX3_MOUSE	sp|P46412|GPX3_MOUSE Glutathione peroxidase 3 OS=Mus musculus GN=Gpx3 PE=1 SV=2;sp|P46412|GPX3_MOUSE Glutathione peroxidase 3 OS=Mus musculus GN=Gpx3 PE=1 SV=2
HPGDS	2.09325	2.05622	1.8654	1.77166	2.0993	1.9653	2.27314	2.28106	2.13191	2.1351	2.10377	1.95366	2.16853	2.46019	2.58734	2.02259	2.11813	2.22632	PREDICTED: hematopoietic prostaglandin D synthase [Pelodiscus sinensis]	GO:0000287;GO:0004667;GO:0042803;GO:2000255;GO:0006693;GO:0005509	magnesium ion binding;prostaglandin-D synthase activity;protein homodimerization activity;negative regulation of male germ cell proliferation;prostaglandin metabolic process;calcium ion binding	K04097	HPGDS	http://www.genome.jp/dbget-bin/www_bget?ko:K04097	Arachidonic acid metabolism;Glutathione metabolism;Drug metabolism - cytochrome P450;Metabolism of xenobiotics by cytochrome P450	ko00590,ko00480,ko00982,ko00980	-	gnl|BL_ORD_ID|41091	sp|O73888|HPGDS_CHICK Hematopoietic prostaglandin D synthase OS=Gallus gallus GN=HPGDS PE=1 SV=3
FAM213B	2.0693	2.03209	2.02403	2.13564	2.32245	2.34343	2.35892	2.27184	2.33339	2.28524	2.25813	2.25159	2.35771	2.56257	2.59195	2.37883	2.32617	2.30874	PREDICTED: prostamide/prostaglandin F synthase [Pelodiscus sinensis]	GO:0005737;GO:0001516;GO:0005829;GO:0043209;GO:0047017;GO:0006629;GO:0055114;GO:0006633;GO:0016491;GO:0006693;GO:0005783;GO:0016616;GO:0006631	cytoplasm;prostaglandin biosynthetic process;cytosol;myelin sheath;prostaglandin-F synthase activity;lipid metabolic process;oxidation-reduction process;fatty acid biosynthetic process;oxidoreductase activity;prostaglandin metabolic process;endoplasmic reticulum;oxidoreductase activity, acting on the CH-OH group of donors, NAD or NADP as acceptor;fatty acid metabolic process	K15717	K15717	http://www.genome.jp/dbget-bin/www_bget?ko:K15717	Arachidonic acid metabolism	ko00590	KOG4498(S)(Uncharacterized conserved protein)	gnl|BL_ORD_ID|125309	sp|Q6AZG8|PGFS_XENLA Prostamide/prostaglandin F synthase OS=Xenopus laevis GN=fam213b PE=2 SV=1
LOC102450917	1.3092	0.830589	1.27738	1.60917	1.75105	1.64709	1.91624	1.87233	2.01473	2.09646	2.07103	1.70148	2.12581	2.19659	1.9058	2.34213	1.87535	2.08149	PREDICTED: lipocalin-like [Pelodiscus sinensis]	GO:0006810;GO:0005215;GO:0006629;GO:0005576;GO:0036094	transport;transporter activity;lipid metabolic process;extracellular region;small molecule binding	K01830	PTGDS	http://www.genome.jp/dbget-bin/www_bget?ko:K01830	Arachidonic acid metabolism	ko00590	-	gnl|BL_ORD_ID|76250;sp|Q01584|LIPO_RHIMB	sp|Q01584|LIPO_RHIMB Lipocalin OS=Rhinella marina PE=1 SV=1;sp|Q01584|LIPO_RHIMB Lipocalin OS=Rhinella marina PE=1 SV=1
LOC102458214	2.65771	2.68642	2.6814	3.17194	3.20795	3.04766	3.02875	2.99592	2.97538	3.01039	3.07267	3.11309	2.53537	2.5661	2.59718	2.52043	2.42367	2.56412	actin, cytoplasmic type 5 [Gallus gallus]<>XP_003209375.1 PREDICTED: actin, cytoplasmic type 5 [Meleagris gallopavo]<>XP_005239451.1 PREDICTED: actin, cytoplasmic type 5 [Falco peregrinus]<>XP_005437512.1 PREDICTED: actin, cytoplasmic type 5 [Falco cherrug]<>XP_006128091.1 PREDICTED: actin, cytoplasmic type 5 isoform X2 [Pelodiscus sinensis]<>XP_009467921.1 PREDICTED: actin, cytoplasmic type 5 is…	GO:0005737;GO:0050998;GO:0035267;GO:0070062;GO:0042802;GO:0014069;GO:0005524;GO:0043044;GO:0005886;GO:0043234;GO:0030529;GO:0019901;GO:0005856;GO:0007409;GO:0001725;GO:0000980;GO:0030957;GO:0097433;GO:0005829;GO:0072562;GO:0016020;GO:0071257;GO:0000978;GO:0005925;GO:0043209;GO:0000790;GO:0000166;GO:0070688;GO:0030424;GO:0070527;GO:0031492;GO:0005615;GO:0030863;GO:0005515;GO:0036464;GO:0002102;GO:…	cytoplasm;nitric-oxide synthase binding;NuA4 histone acetyltransferase complex;extracellular exosome;identical protein binding;postsynaptic density of dendrite;ATP binding;ATP-dependent chromatin remodeling;plasma membrane;protein complex;intracellular ribonucleoprotein complex;protein kinase binding;cytoskeleton;axonogenesis;stress fiber;RNA polymerase II distal enhancer sequence-specific DNA bi…	K05692	ACTB_G1	http://www.genome.jp/dbget-bin/www_bget?ko:K05692	Apoptosis;Regulation of actin cytoskeleton;Adherens junction;Focal adhesion;Tight junction;Phagosome;Hippo signaling pathway;Hippo signaling pathway -fly;Rap1 signaling pathway;Oxytocin signaling pathway;Thyroid hormone signaling pathway;Leukocyte transendothelial migration;Platelet activation;Phototransduction - fly	ko04210,ko04810,ko04520,ko04510,ko04530,ko04145,ko04390,ko04391,ko04015,ko04921,ko04919,ko04670,ko04611,ko04745	KOG0676(Z)(Actin and related proteins)	sp|P53478|ACT5_CHICK;gnl|BL_ORD_ID|268218	sp|P53478|ACT5_CHICK Actin, cytoplasmic type 5 OS=Gallus gallus PE=3 SV=1;sp|P53478|ACT5_CHICK Actin, cytoplasmic type 5 OS=Gallus gallus PE=3 SV=1
LOC106731509	2.44868	1.9758	2.17713	2.17214	2.47716	2.20986	2.22629	2.1784	2.68229	2.47643	2.86167	2.46455	2.73746	2.57342	3.15812	2.83398	2.6647	2.99809	PREDICTED: perforin-1-like, partial [Pelodiscus sinensis];PREDICTED: perforin-1-like [Pelodiscus sinensis]	-	-	K07818	PRF1	http://www.genome.jp/dbget-bin/www_bget?ko:K07818	Apoptosis;Natural killer cell mediated cytotoxicity	ko04210,ko04650	-	gnl|BL_ORD_ID|122046;sp|P35763|PERF_RAT	sp|P14222|PERF_HUMAN Perforin-1 OS=Homo sapiens GN=PRF1 PE=1 SV=1;sp|P35763|PERF_RAT Perforin-1 OS=Rattus norvegicus GN=Prf1 PE=2 SV=1
LOC102447447	1.8014	1.63699	1.58838	1.5649	2.01448	1.82053	2.02633	2.01502	2.11929	2.11504	2.05588	2.01561	2.17676	2.42869	2.40054	2.26007	2.33175	2.45744	PREDICTED: cathepsin K [Pelodiscus sinensis]<>XP_006132120.1 PREDICTED: cathepsin K [Pelodiscus sinensis]	GO:0008233;GO:1903955;GO:0005518;GO:0004197;GO:0030574;GO:0043394;GO:0008234;GO:0001968;GO:0005615;GO:0051603;GO:0016787;GO:0006508;GO:1903146	peptidase activity;positive regulation of protein targeting to mitochondrion;collagen binding;cysteine-type endopeptidase activity;collagen catabolic process;proteoglycan binding;cysteine-type peptidase activity;fibronectin binding;extracellular space;proteolysis involved in cellular protein catabolic process;hydrolase activity;proteolysis;regulation of mitophagy	K01371	CTSK	http://www.genome.jp/dbget-bin/www_bget?ko:K01371	Apoptosis;Lysosome;Osteoclast differentiation;Toll-like receptor signaling pathway	ko04210,ko04142,ko04380,ko04620	KOG1543(O)(Cysteine proteinase Cathepsin L)	gnl|BL_ORD_ID|320841	sp|Q9GLE3|CATK_PIG Cathepsin K OS=Sus scrofa GN=CTSK PE=2 SV=1
CTSC	2.04766	1.99484	2.03495	1.71925	2.03937	1.68717	2.4413	2.29001	2.14401	2.3927	2.23641	2.13159	2.21827	2.80266	2.49042	2.17461	2.30423	2.39426	PREDICTED: dipeptidyl peptidase 1 [Pelodiscus sinensis]	GO:0008233;GO:0070062;GO:0008234;GO:0001913;GO:0016020;GO:0006915;GO:0016505;GO:0005615;GO:0016787;GO:2001235;GO:0006508;GO:0004252	peptidase activity;extracellular exosome;cysteine-type peptidase activity;T cell mediated cytotoxicity;membrane;apoptotic process;peptidase activator activity involved in apoptotic process;extracellular space;hydrolase activity;positive regulation of apoptotic signaling pathway;proteolysis;serine-type endopeptidase activity	K01275	CTSC	http://www.genome.jp/dbget-bin/www_bget?ko:K01275	Apoptosis;Lysosome	ko04210,ko04142	KOG1543(O)(Cysteine proteinase Cathepsin L)	sp|P53634|CATC_HUMAN;gnl|BL_ORD_ID|321329	sp|P53634|CATC_HUMAN Dipeptidyl peptidase 1 OS=Homo sapiens GN=CTSC PE=1 SV=2;sp|Q5RB02|CATC_PONAB Dipeptidyl peptidase 1 OS=Pongo abelii GN=CTSC PE=2 SV=1
CTSH	1.92531	2.00039	1.94236	1.96435	2.11588	2.14752	2.02354	2.04033	2.26628	2.12015	2.24959	2.04376	2.44392	2.54537	2.52834	2.49317	2.34084	2.4208	PREDICTED: pro-cathepsin H [Pelodiscus sinensis]	GO:0008233;GO:0008234;GO:0016787;GO:0006508	peptidase activity;cysteine-type peptidase activity;hydrolase activity;proteolysis	K01366	CTSH	http://www.genome.jp/dbget-bin/www_bget?ko:K01366	Apoptosis;Lysosome	ko04210,ko04142	KOG1543(O)(Cysteine proteinase Cathepsin L)	sp|O46427|CATH_PIG;gnl|BL_ORD_ID|311130	sp|O46427|CATH_PIG Pro-cathepsin H OS=Sus scrofa GN=CTSH PE=1 SV=1;sp|O46427|CATH_PIG Pro-cathepsin H OS=Sus scrofa GN=CTSH PE=1 SV=1
CTSZ	2.11109	1.95308	2.17782	1.48073	2.12639	1.78902	2.44989	2.31442	2.46075	2.62538	2.4338	2.18616	2.52599	2.92131	2.90229	2.52644	2.5306	2.89262	PREDICTED: cathepsin Z [Pelodiscus sinensis]	GO:0070062;GO:0004197;GO:0008234;GO:0005764;GO:0043231;GO:0005615;GO:0005783;GO:0051603;GO:0006508;GO:0060441	extracellular exosome;cysteine-type endopeptidase activity;cysteine-type peptidase activity;lysosome;intracellular membrane-bounded organelle;extracellular space;endoplasmic reticulum;proteolysis involved in cellular protein catabolic process;proteolysis;epithelial tube branching involved in lung morphogenesis	K08568	CTSZ	http://www.genome.jp/dbget-bin/www_bget?ko:K08568	Apoptosis;Lysosome	ko04210,ko04142	KOG1543(O)(Cysteine proteinase Cathepsin L)	gnl|BL_ORD_ID|322554;sp|P05689|CATZ_BOVIN;sp|Q9R1T3|CATZ_RAT	sp|Q9R1T3|CATZ_RAT Cathepsin Z OS=Rattus norvegicus GN=Ctsz PE=1 SV=2;sp|P05689|CATZ_BOVIN Cathepsin Z OS=Bos taurus GN=CTSZ PE=2 SV=2;sp|Q9R1T3|CATZ_RAT Cathepsin Z OS=Rattus norvegicus GN=Ctsz PE=1 SV=2
LOC102456974	2.87264	2.75546	2.80497	3.02691	2.92206	2.93441	2.73109	2.8212	2.82899	2.8081	2.74977	2.86238	2.36536	2.51614	2.33881	2.23014	2.34629	2.39655	PREDICTED: tubulin alpha-1A chain isoform X1 [Oreochromis niloticus];Chain A, Near-atomic Cryo-em Structure Of Prc1 Bound To The Microtubule;PREDICTED: tubulin alpha-1C chain isoform X3 [Oreochromis niloticus]	GO:0031625;GO:0005737;GO:0070062;GO:0003924;GO:0003725;GO:0071353;GO:0000226;GO:0051301;GO:0000086;GO:0005881;GO:0030705;GO:0005856;GO:0007010;GO:0046982;GO:0005829;GO:0007017;GO:0006457;GO:0043209;GO:0000166;GO:0005198;GO:0005874;GO:0021634;GO:0005515;GO:0036464;GO:0055037;GO:0043066;GO:0005525;GO:0005634;GO:0005200;GO:0019904	ubiquitin protein ligase binding;cytoplasm;extracellular exosome;GTPase activity;double-stranded RNA binding;cellular response to interleukin-4;microtubule cytoskeleton organization;cell division;G2/M transition of mitotic cell cycle;cytoplasmic microtubule;cytoskeleton-dependent intracellular transport;cytoskeleton;cytoskeleton organization;protein heterodimerization activity;cytosol;microtubule…	K07374	TUBA	http://www.genome.jp/dbget-bin/www_bget?ko:K07374	Apoptosis;Gap junction;Tight junction;Phagosome	ko04210,ko04540,ko04530,ko04145	KOG1376(Z)(Alpha tubulin)	sp|P68361|TBA1B_CRIGR;sp|P81947|TBA1B_BOVIN;sp|P68363|TBA1B_HUMAN;sp|Q2XVP4|TBA1B_PIG;sp|P68370|TBA1A_RAT;gnl|BL_ORD_ID|506682	sp|P68361|TBA1B_CRIGR Tubulin alpha-1B chain OS=Cricetulus griseus GN=TUBA1B PE=2 SV=1;sp|P81947|TBA1B_BOVIN Tubulin alpha-1B chain OS=Bos taurus PE=1 SV=2;sp|P68363|TBA1B_HUMAN Tubulin alpha-1B chain OS=Homo sapiens GN=TUBA1B PE=1 SV=1;sp|Q2XVP4|TBA1B_PIG Tubulin alpha-1B chain OS=Sus scrofa GN=TUBA1B PE=1 SV=1;sp|P68370|TBA1A_RAT Tubulin alpha-1A chain OS=Rattus norvegicus GN=Tuba1a PE=1 SV=1;s…
CTSD	1.74194	1.63083	1.62716	1.69975	1.8386	1.72501	2.09562	1.97049	1.91089	2.03902	1.99978	1.96717	1.81598	2.06826	1.98932	1.86451	1.78696	1.98155	PREDICTED: cathepsin D [Pelodiscus sinensis]	GO:0008233;GO:0004190;GO:0005764;GO:0016787;GO:0006508	peptidase activity;aspartic-type endopeptidase activity;lysosome;hydrolase activity;proteolysis	K01379	CTSD	http://www.genome.jp/dbget-bin/www_bget?ko:K01379	Apoptosis;Autophagy - animal;Lysosome;Sphingolipid signaling pathway	ko04210,ko04140,ko04142,ko04071	KOG1339(O)(Aspartyl protease)	gnl|BL_ORD_ID|313657	sp|Q05744|CATD_CHICK Cathepsin D OS=Gallus gallus GN=CTSD PE=1 SV=1
CTSB	1.72247	1.37144	1.65667	1.71742	1.8496	1.72156	1.84677	1.63508	1.78597	1.81889	1.74865	1.65002	1.799	2.03667	2.1672	1.87651	1.88902	1.89276	PREDICTED: cathepsin B, partial [Pelodiscus sinensis]	GO:0008233;GO:0004197;GO:0050790;GO:0008234;GO:0016787;GO:0006508	peptidase activity;cysteine-type endopeptidase activity;regulation of catalytic activity;cysteine-type peptidase activity;hydrolase activity;proteolysis	K01363	CTSB	http://www.genome.jp/dbget-bin/www_bget?ko:K01363	Apoptosis;Autophagy - animal;Lysosome;Renin secretion;Antigen processing and presentation;NOD-like receptor signaling pathway	ko04210,ko04140,ko04142,ko04924,ko04612,ko04621	KOG1543(O)(Cysteine proteinase Cathepsin L)	gnl|BL_ORD_ID|321326;sp|P43233|CATB_CHICK	sp|P43233|CATB_CHICK Cathepsin B OS=Gallus gallus GN=CTSB PE=2 SV=1;sp|P43233|CATB_CHICK Cathepsin B OS=Gallus gallus GN=CTSB PE=2 SV=1
CTSL	2.41667	2.19223	2.18321	2.07853	2.26633	2.14104	2.62871	2.35702	2.47192	2.5367	2.36359	2.31161	2.21514	2.90123	2.61624	2.35162	2.40582	2.42773	PREDICTED: cathepsin L1 [Pelodiscus sinensis]	GO:0008233;GO:0004197;GO:0008234;GO:0005764;GO:0005615;GO:0051603;GO:0016787;GO:0006508	peptidase activity;cysteine-type endopeptidase activity;cysteine-type peptidase activity;lysosome;extracellular space;proteolysis involved in cellular protein catabolic process;hydrolase activity;proteolysis	K01365	CTSL	http://www.genome.jp/dbget-bin/www_bget?ko:K01365	Apoptosis;Autophagy - animal;Lysosome;Phagosome;Antigen processing and presentation	ko04210,ko04140,ko04142,ko04145,ko04612	KOG1543(O)(Cysteine proteinase Cathepsin L)	gnl|BL_ORD_ID|313670;sp|Q9GKL8|CATL1_CHLAE;sp|P25975|CATL1_BOVIN	sp|P25975|CATL1_BOVIN Cathepsin L1 OS=Bos taurus GN=CTSL PE=1 SV=3;sp|Q9GKL8|CATL1_CHLAE Cathepsin L1 OS=Chlorocebus aethiops GN=CTSL PE=1 SV=1;sp|P25975|CATL1_BOVIN Cathepsin L1 OS=Bos taurus GN=CTSL PE=1 SV=3
ATF4	2.393	2.46742	2.44121	2.34922	2.22311	2.33391	2.28373	2.30339	2.37205	2.32238	2.32748	2.31622	2.48893	2.42521	2.36205	2.46362	2.52233	2.37449	PREDICTED: cyclic AMP-dependent transcription factor ATF-4 [Pelodiscus sinensis]	GO:0000981;GO:0001077;GO:0005737;GO:1990590;GO:0003700;GO:0000978;GO:0001046;GO:0006094;GO:0001085;GO:0043005;GO:0070059;GO:0045944;GO:0003677;GO:0006355;GO:0010575;GO:0042149;GO:0042789;GO:0006357;GO:0005667;GO:0043565;GO:0032922;GO:0007623;GO:0005634;GO:0044212;GO:1990617;GO:0034399;GO:1990037;GO:0036499;GO:0043522;GO:1990589	RNA polymerase II transcription factor activity, sequence-specific DNA binding;transcriptional activator activity, RNA polymerase II core promoter proximal region sequence-specific binding;cytoplasm;ATF1-ATF4 transcription factor complex;transcription factor activity, sequence-specific DNA binding;RNA polymerase II core promoter proximal region sequence-specific DNA binding;core promoter sequence…	K04374	ATF4,CREB2	http://www.genome.jp/dbget-bin/www_bget?ko:K04374	Apoptosis;Apoptosis - fly;Mitophagy - animal;MAPK signaling pathway;PI3K-Akt signaling pathway;TNF signaling pathway;cGMP - PKG signaling pathway;Protein processing in endoplasmic reticulum;Longevity regulating pathway - mammal;Longevity regulating pathway - worm;Adrenergic signaling in cardiomyocytes;Aldosterone synthesis and secretion;Estrogen signaling pathway;Glucagon signaling pathway;GnRH s…	ko04210,ko04214,ko04137,ko04010,ko04151,ko04668,ko04022,ko04141,ko04211,ko04212,ko04261,ko04925,ko04915,ko04922,ko04912,ko04911,ko04918,ko04725,ko04728,ko04720,ko04722	-	sp|P18848|ATF4_HUMAN;gnl|BL_ORD_ID|297551	sp|P18848|ATF4_HUMAN Cyclic AMP-dependent transcription factor ATF-4 OS=Homo sapiens GN=ATF4 PE=1 SV=3;sp|P18848|ATF4_HUMAN Cyclic AMP-dependent transcription factor ATF-4 OS=Homo sapiens GN=ATF4 PE=1 SV=3
BOK	1.24674	0.922206	0.986324	1.97868	2.12956	2.03028	2.2583	2.08185	1.89916	2.08842	2.14625	2.03838	2.48179	1.96114	1.94841	2.15746	1.88705	1.87818	PREDICTED: LOW QUALITY PROTEIN: bcl-2-related ovarian killer protein [Pelodiscus sinensis]	GO:0042981	regulation of apoptotic process	K02561	BOK	http://www.genome.jp/dbget-bin/www_bget?ko:K02561	Apoptosis - fly;Apoptosis - multiple species	ko04214,ko04215	-	sp|Q9I8I2|BOK_CHICK;gnl|BL_ORD_ID|311867	sp|Q9I8I2|BOK_CHICK Bcl-2-related ovarian killer protein OS=Gallus gallus GN=BOK PE=2 SV=1;sp|Q9I8I2|BOK_CHICK Bcl-2-related ovarian killer protein OS=Gallus gallus GN=BOK PE=2 SV=1
PRDX2	2.36339	2.14451	2.1491	2.89125	2.69151	2.81631	2.28251	2.30961	2.26086	2.22863	2.30535	2.27669	1.59649	1.7905	1.86729	1.80726	1.61962	1.81144	PREDICTED: peroxiredoxin-2 [Pelodiscus sinensis]	GO:0019430;GO:0008379;GO:0055114;GO:0016209;GO:0016491;GO:0051920	removal of superoxide radicals;thioredoxin peroxidase activity;oxidation-reduction process;antioxidant activity;oxidoreductase activity;peroxiredoxin activity	K03386	PRDX2_4,ahpC	http://www.genome.jp/dbget-bin/www_bget?ko:K03386	Apoptosis - fly	ko04214	KOG0852(O)(Alkyl hydroperoxide reductase, thiol specific antioxidant and related enzymes)	gnl|BL_ORD_ID|136266	sp|Q61171|PRDX2_MOUSE Peroxiredoxin-2 OS=Mus musculus GN=Prdx2 PE=1 SV=3
LOC102460784	1.4257	1.11628	1.31302	1.79421	1.77452	1.74935	1.62066	1.62808	1.67477	1.63033	1.54716	1.59693	1.59517	1.57898	1.69958	1.61805	1.46835	1.53199	PREDICTED: cyclic AMP-responsive element-binding protein 3-like [Pelodiscus sinensis]	GO:0030968;GO:0045944;GO:0035497;GO:0003700	endoplasmic reticulum unfolded protein response;positive regulation of transcription from RNA polymerase II promoter;cAMP response element binding;transcription factor activity, sequence-specific DNA binding	K09048	CREB3	http://www.genome.jp/dbget-bin/www_bget?ko:K09048	AMPK signaling pathway;PI3K-Akt signaling pathway;TNF signaling pathway;cAMP signaling pathway;cGMP - PKG signaling pathway;Longevity regulating pathway - mammal;Adrenergic signaling in cardiomyocytes;Aldosterone synthesis and secretion;Estrogen signaling pathway;Glucagon signaling pathway;Insulin secretion;Melanogenesis;Thyroid hormone synthesis;Vasopressin-regulated water reabsorption;Cholinerg…	ko04152,ko04151,ko04668,ko04024,ko04022,ko04211,ko04261,ko04925,ko04915,ko04922,ko04911,ko04916,ko04918,ko04962,ko04725,ko04728	-	-	-
LOC102447388	2.19714	2.25071	2.19813	2.01068	2.19476	2.13897	2.44601	2.32232	2.26534	2.29576	2.37179	2.21059	2.28661	2.57136	2.6663	2.2395	2.27948	2.28389	PREDICTED: fructose-1,6-bisphosphatase 1 [Pelodiscus sinensis]	GO:0005975;GO:0042132;GO:0042578;GO:0016787	carbohydrate metabolic process;fructose 1,6-bisphosphate 1-phosphatase activity;phosphoric ester hydrolase activity;hydrolase activity	K03841	FBP,fbp	http://www.genome.jp/dbget-bin/www_bget?ko:K03841	AMPK signaling pathway;Fructose and mannose metabolism;Glycolysis / Gluconeogenesis;Pentose phosphate pathway;Carbon fixation in photosynthetic organisms;Methane metabolism;Carbon metabolism;Insulin signaling pathway	ko04152,ko00051,ko00010,ko00030,ko00710,ko00680,ko01200,ko04910	KOG1458(G)(Fructose-1,6-bisphosphatase)	sp|P09467|F16P1_HUMAN;sp|P00637|F16P1_RABIT;gnl|BL_ORD_ID|383396	sp|P09467|F16P1_HUMAN Fructose-1,6-bisphosphatase 1 OS=Homo sapiens GN=FBP1 PE=1 SV=5;sp|P00637|F16P1_RABIT Fructose-1,6-bisphosphatase 1 OS=Oryctolagus cuniculus GN=FBP1 PE=1 SV=4;sp|P00637|F16P1_RABIT Fructose-1,6-bisphosphatase 1 OS=Oryctolagus cuniculus GN=FBP1 PE=1 SV=4
LOC106731579	2.24244	1.96128	2.11952	2.14507	2.23872	2.20922	2.3966	2.31167	2.4101	2.23004	2.42745	2.18184	2.32366	2.54551	2.66829	2.42653	2.37493	2.47157	PREDICTED: LOW QUALITY PROTEIN: phosphoenolpyruvate carboxykinase [GTP], mitochondrial-like, partial [Pelodiscus sinensis]	GO:0070062;GO:0006094;GO:0071333;GO:0016831;GO:0006116;GO:0006107;GO:0005739;GO:0017076;GO:0032496;GO:0016829;GO:0004613;GO:0000166;GO:0071356;GO:0004611;GO:0006090;GO:0005525;GO:0032024;GO:0071548;GO:0046872	extracellular exosome;gluconeogenesis;cellular response to glucose stimulus;carboxy-lyase activity;NADH oxidation;oxaloacetate metabolic process;mitochondrion;purine nucleotide binding;response to lipopolysaccharide;lyase activity;phosphoenolpyruvate carboxykinase (GTP) activity;nucleotide binding;cellular response to tumor necrosis factor;phosphoenolpyruvate carboxykinase activity;pyruvate metab…	K01596	E4.1.1.32,pckA,PCK	http://www.genome.jp/dbget-bin/www_bget?ko:K01596	AMPK signaling pathway;FoxO signaling pathway;PI3K-Akt signaling pathway;Citrate cycle (TCA cycle);Glycolysis / Gluconeogenesis;Pyruvate metabolism;Adipocytokine signaling pathway;Glucagon signaling pathway;Insulin signaling pathway;PPAR signaling pathway;Proximal tubule bicarbonate reclamation	ko04152,ko04068,ko04151,ko00020,ko00010,ko00620,ko04920,ko04922,ko04910,ko03320,ko04964	-	sp|Q8BH04|PCKGM_MOUSE;sp|Q5R5J1|PCKGC_PONAB;gnl|BL_ORD_ID|119060	sp|Q8BH04|PCKGM_MOUSE Phosphoenolpyruvate carboxykinase [GTP], mitochondrial OS=Mus musculus GN=Pck2 PE=1 SV=1;sp|Q5R5J1|PCKGC_PONAB Phosphoenolpyruvate carboxykinase, cytosolic [GTP] OS=Pongo abelii GN=PCK1 PE=2 SV=1;sp|Q5R5J1|PCKGC_PONAB Phosphoenolpyruvate carboxykinase, cytosolic [GTP] OS=Pongo abelii GN=PCK1 PE=2 SV=1
HNF4A	1.61458	1.63347	1.63558	1.28194	1.45102	1.61416	1.70449	1.629	1.68006	1.77887	1.63448	1.69662	1.70406	1.99282	1.85376	1.64454	1.76834	1.804	PREDICTED: hepatocyte nuclear factor 4-alpha isoform X2 [Pelodiscus sinensis];PREDICTED: hepatocyte nuclear factor 4-alpha isoform X1 [Pelodiscus sinensis]	GO:0005737;GO:0003705;GO:0042593;GO:0050796;GO:0070328;GO:0003677;GO:2000189;GO:0001102;GO:0005504;GO:0023019;GO:0003707;GO:0055091;GO:0045944;GO:0006629;GO:0000979;GO:0006591;GO:0006351;GO:0042803;GO:0003700;GO:0001228;GO:0008270;GO:0005634	cytoplasm;transcription factor activity, RNA polymerase II distal enhancer sequence-specific binding;glucose homeostasis;regulation of insulin secretion;triglyceride homeostasis;DNA binding;positive regulation of cholesterol homeostasis;RNA polymerase II activating transcription factor binding;fatty acid binding;signal transduction involved in regulation of gene expression;steroid hormone recepto…	K07292	NR2A1,HNF4A	http://www.genome.jp/dbget-bin/www_bget?ko:K07292	AMPK signaling pathway	ko04152	KOG4215(K)(Hepatocyte nuclear factor 4 and similar steroid hormone receptors)	sp|Q91766|HNF4A_XENLA;gnl|BL_ORD_ID|400621;gnl|BL_ORD_ID|399437	sp|Q91766|HNF4A_XENLA Hepatocyte nuclear factor 4-alpha OS=Xenopus laevis GN=hnf4a PE=2 SV=2;sp|P22449|HNF4A_RAT Hepatocyte nuclear factor 4-alpha OS=Rattus norvegicus GN=Hnf4a PE=1 SV=3;sp|Q91766|HNF4A_XENLA Hepatocyte nuclear factor 4-alpha OS=Xenopus laevis GN=hnf4a PE=2 SV=2
MARS	1.43696	1.45924	1.6504	1.92829	1.69504	1.971	1.29907	1.26411	1.46716	1.20222	1.3249	1.29248	1.58501	1.44389	1.48968	1.70995	1.50934	1.52284	PREDICTED: methionine--tRNA ligase, cytoplasmic [Pelodiscus sinensis]	-	-	K01874	MARS,metG	http://www.genome.jp/dbget-bin/www_bget?ko:K01874	Aminoacyl-tRNA biosynthesis;Selenocompound metabolism	ko00970,ko00450	KOG1247(J)(Methionyl-tRNA synthetase)	sp|P56192|SYMC_HUMAN;gnl|BL_ORD_ID|497154	sp|P56192|SYMC_HUMAN Methionine--tRNA ligase, cytoplasmic OS=Homo sapiens GN=MARS PE=1 SV=2;sp|P56192|SYMC_HUMAN Methionine--tRNA ligase, cytoplasmic OS=Homo sapiens GN=MARS PE=1 SV=2
TARS2	1.5427	1.32428	1.43152	1.94939	1.79962	2.00165	1.55315	1.55206	1.74304	1.6219	1.54654	1.58388	1.79379	1.91965	1.95559	1.92645	1.85673	1.80154	PREDICTED: threonine--tRNA ligase, mitochondrial [Pelodiscus sinensis]	-	-	K01868	TARS,thrS	http://www.genome.jp/dbget-bin/www_bget?ko:K01868	Aminoacyl-tRNA biosynthesis	ko00970	KOG1637(J)(Threonyl-tRNA synthetase)	sp|Q9D0R2|SYTC_MOUSE;gnl|BL_ORD_ID|508276;sp|Q0V9S0|SYTC2_XENTR	sp|Q9D0R2|SYTC_MOUSE Threonine--tRNA ligase, cytoplasmic OS=Mus musculus GN=Tars PE=1 SV=2;sp|Q9D0R2|SYTC_MOUSE Threonine--tRNA ligase, cytoplasmic OS=Mus musculus GN=Tars PE=1 SV=2;sp|Q0V9S0|SYTC2_XENTR Probable threonine--tRNA ligase 2, cytoplasmic OS=Xenopus tropicalis GN=tarsl2 PE=2 SV=1
VARS	1.56526	1.44248	1.4312	1.89763	1.94988	1.93571	1.58252	1.67897	1.68806	1.58354	1.61109	1.64816	1.32797	1.40466	1.40739	1.3784	1.37949	1.32305	PREDICTED: valine--tRNA ligase [Chrysemys picta bellii];PREDICTED: valine--tRNA ligase [Pelodiscus sinensis]	-	-	K01873	VARS,valS	http://www.genome.jp/dbget-bin/www_bget?ko:K01873	Aminoacyl-tRNA biosynthesis	ko00970	KOG0433(J)(Isoleucyl-tRNA synthetase)	gnl|BL_ORD_ID|515201;sp|Q9Z1Q9|SYVC_MOUSE	sp|Q9Z1Q9|SYVC_MOUSE Valine--tRNA ligase OS=Mus musculus GN=Vars PE=1 SV=1;sp|Q9Z1Q9|SYVC_MOUSE Valine--tRNA ligase OS=Mus musculus GN=Vars PE=1 SV=1
GPI	2.52372	2.70434	2.59111	2.69546	2.57341	2.76832	2.4715	2.58686	2.57611	2.52673	2.53306	2.63104	2.72288	2.81554	2.75133	2.66519	2.92286	2.76105	PREDICTED: glucose-6-phosphate isomerase [Chelonia mydas];PREDICTED: glucose-6-phosphate isomerase [Chrysemys picta bellii];PREDICTED: glucose-6-phosphate isomerase [Pelodiscus sinensis]	GO:0006096;GO:0031625;GO:0005737;GO:0042593;GO:0070062;GO:0005654;GO:0006094;GO:0001707;GO:0005886;GO:0016020;GO:0004347;GO:0034101;GO:0043209;GO:0016853;GO:0060170	glycolytic process;ubiquitin protein ligase binding;cytoplasm;glucose homeostasis;extracellular exosome;nucleoplasm;gluconeogenesis;mesoderm formation;plasma membrane;membrane;glucose-6-phosphate isomerase activity;erythrocyte homeostasis;myelin sheath;isomerase activity;ciliary membrane	K01810	GPI,pgi	http://www.genome.jp/dbget-bin/www_bget?ko:K01810	Amino sugar and nucleotide sugar metabolism;Glycolysis / Gluconeogenesis;Pentose phosphate pathway;Starch and sucrose metabolism;Carbon metabolism	ko00520,ko00010,ko00030,ko00500,ko01200	KOG2446(G)(Glucose-6-phosphate isomerase)	gnl|BL_ORD_ID|1876;sp|P06744|G6PI_HUMAN;sp|Q3ZBD7|G6PI_BOVIN	sp|Q3ZBD7|G6PI_BOVIN Glucose-6-phosphate isomerase OS=Bos taurus GN=GPI PE=2 SV=4;sp|P06744|G6PI_HUMAN Glucose-6-phosphate isomerase OS=Homo sapiens GN=GPI PE=1 SV=4;sp|Q3ZBD7|G6PI_BOVIN Glucose-6-phosphate isomerase OS=Bos taurus GN=GPI PE=2 SV=4
UGP2	1.58861	1.60271	1.54357	1.57726	1.4239	1.52323	1.64846	1.65935	1.67742	1.75066	1.64098	1.62644	1.70586	2.08138	1.94983	1.71975	1.83537	1.8537	PREDICTED: UTP--glucose-1-phosphate uridylyltransferase [Pelodiscus sinensis]	GO:0070062;GO:0008152;GO:0042802;GO:0003983;GO:0006011;GO:0070569;GO:0005634	extracellular exosome;metabolic process;identical protein binding;UTP:glucose-1-phosphate uridylyltransferase activity;UDP-glucose metabolic process;uridylyltransferase activity;nucleus	K00963	UGP2,galU,galF	http://www.genome.jp/dbget-bin/www_bget?ko:K00963	Amino sugar and nucleotide sugar metabolism;Galactose metabolism;Pentose and glucuronate interconversions;Starch and sucrose metabolism	ko00520,ko00052,ko00040,ko00500	KOG2638(G)(UDP-glucose pyrophosphorylase)	sp|Q91ZJ5|UGPA_MOUSE;gnl|BL_ORD_ID|236215	sp|Q91ZJ5|UGPA_MOUSE UTP--glucose-1-phosphate uridylyltransferase OS=Mus musculus GN=Ugp2 PE=1 SV=3;sp|Q91ZJ5|UGPA_MOUSE UTP--glucose-1-phosphate uridylyltransferase OS=Mus musculus GN=Ugp2 PE=1 SV=3
GMPPB	1.78197	1.6505	1.70834	2.24699	2.261	2.11644	2.18986	2.20074	2.16923	2.08027	2.17014	2.13694	2.03794	2.109	2.23752	2.07056	2.12642	2.11767	PREDICTED: mannose-1-phosphate guanyltransferase beta [Pelodiscus sinensis]	GO:0005737;GO:0070062;GO:0006486;GO:0005739;GO:0016740;GO:0048747;GO:0009058;GO:0016779	cytoplasm;extracellular exosome;protein glycosylation;mitochondrion;transferase activity;muscle fiber development;biosynthetic process;nucleotidyltransferase activity	K00966	GMPP	http://www.genome.jp/dbget-bin/www_bget?ko:K00966	Amino sugar and nucleotide sugar metabolism;Fructose and mannose metabolism	ko00520,ko00051	KOG1322(M)(GDP-mannose pyrophosphorylase/mannose-1-phosphate guanylyltransferase)	sp|Q8BTZ7|GMPPB_MOUSE;sp|Q6DBU5|GMPPB_DANRE;gnl|BL_ORD_ID|21742	sp|Q8BTZ7|GMPPB_MOUSE Mannose-1-phosphate guanyltransferase beta OS=Mus musculus GN=Gmppb PE=1 SV=1;sp|Q6DBU5|GMPPB_DANRE Mannose-1-phosphate guanyltransferase beta OS=Danio rerio GN=gmppb PE=2 SV=1;sp|A2VD83|GMPBB_XENLA Mannose-1-phosphate guanyltransferase beta-B OS=Xenopus laevis GN=gmppb-b PE=2 SV=1
UGDH	1.69205	1.56891	1.72362	1.56372	1.68886	1.45924	1.93852	1.90412	1.96487	2.03007	1.93782	1.87864	1.75328	1.92967	2.0204	1.72198	1.908	2.01119	PREDICTED: UDP-glucose 6-dehydrogenase [Pelodiscus sinensis]<>XP_006129570.1 PREDICTED: UDP-glucose 6-dehydrogenase [Pelodiscus sinensis]<>XP_006129571.1 PREDICTED: UDP-glucose 6-dehydrogenase [Pelodiscus sinensis]	GO:0070062;GO:0005654;GO:0005975;GO:0006065;GO:0005829;GO:0003979;GO:0006024;GO:0055114;GO:0016491;GO:0016616;GO:0001702;GO:0005634;GO:0051287	extracellular exosome;nucleoplasm;carbohydrate metabolic process;UDP-glucuronate biosynthetic process;cytosol;UDP-glucose 6-dehydrogenase activity;glycosaminoglycan biosynthetic process;oxidation-reduction process;oxidoreductase activity;oxidoreductase activity, acting on the CH-OH group of donors, NAD or NADP as acceptor;gastrulation with mouth forming second;nucleus;NAD binding	K00012	UGDH,ugd	http://www.genome.jp/dbget-bin/www_bget?ko:K00012	Amino sugar and nucleotide sugar metabolism;Ascorbate and aldarate metabolism;Pentose and glucuronate interconversions	ko00520,ko00053,ko00040	-	gnl|BL_ORD_ID|237923;sp|Q5F3T9|UGDH_CHICK	sp|Q5F3T9|UGDH_CHICK UDP-glucose 6-dehydrogenase OS=Gallus gallus GN=UGDH PE=2 SV=1;sp|Q5F3T9|UGDH_CHICK UDP-glucose 6-dehydrogenase OS=Gallus gallus GN=UGDH PE=2 SV=1
NAGK	1.39235	1.20817	1.28646	1.68806	1.67633	1.63998	1.70088	1.60724	1.60108	1.62346	1.59824	1.7391	1.29907	1.43696	1.46568	1.3969	1.46135	1.499	PREDICTED: LOW QUALITY PROTEIN: N-acetyl-D-glucosamine kinase [Pelodiscus sinensis]	-	-	K00884	NAGK,nagK	http://www.genome.jp/dbget-bin/www_bget?ko:K00884	Amino sugar and nucleotide sugar metabolism	ko00520	-	gnl|BL_ORD_ID|108059;sp|Q3SZM9|NAGK_BOVIN	sp|Q3SZM9|NAGK_BOVIN N-acetyl-D-glucosamine kinase OS=Bos taurus GN=NAGK PE=2 SV=1;sp|Q3SZM9|NAGK_BOVIN N-acetyl-D-glucosamine kinase OS=Bos taurus GN=NAGK PE=2 SV=1
LOC102456275	1.79609	1.67449	1.61951	1.45439	1.69487	1.55666	1.94993	1.75197	1.87587	1.87651	1.7155	1.6826	1.68958	2.13098	2.22282	1.81231	1.76604	1.94433	PREDICTED: N-acetylated-alpha-linked acidic dipeptidase 2 [Pelodiscus sinensis];PREDICTED: N-acetylated-alpha-linked acidic dipeptidase 2-like isoform X1 [Chelonia mydas];PREDICTED: putative N-acetylated-alpha-linked acidic dipeptidase isoform X1 [Pelodiscus sinensis]	GO:0050129;GO:0008233;GO:0070062;GO:0035609;GO:0005886;GO:0042135;GO:0016021;GO:0004181;GO:0016805;GO:0016020;GO:0005887;GO:1904493;GO:0006760;GO:1904492;GO:0006508;GO:0004180;GO:0009986	N-formylglutamate deformylase activity;peptidase activity;extracellular exosome;C-terminal protein deglutamylation;plasma membrane;neurotransmitter catabolic process;integral component of membrane;metallocarboxypeptidase activity;dipeptidase activity;membrane;integral component of plasma membrane;tetrahydrofolyl-poly(glutamate) polymer binding;folic acid-containing compound metabolic process;Ac-A…	K14592;K01301	FOLH1,GCPII;NAALAD	http://www.genome.jp/dbget-bin/www_bget?ko:K14592;http://www.genome.jp/dbget-bin/www_bget?ko:K01301	Alanine, aspartate and glutamate metabolism;Vitamin digestion and absorption	ko00250,ko04977	KOG2195(OPR)(Transferrin receptor and related proteins containing the protease-associated (PA) domain)	gnl|BL_ORD_ID|115125;sp|Q9Y3Q0|NALD2_HUMAN;sp|O77564|FOLH1_PIG;sp|Q9CZR2|NALD2_MOUSE	sp|Q9Y3Q0|NALD2_HUMAN N-acetylated-alpha-linked acidic dipeptidase 2 OS=Homo sapiens GN=NAALAD2 PE=1 SV=1;sp|Q9Y3Q0|NALD2_HUMAN N-acetylated-alpha-linked acidic dipeptidase 2 OS=Homo sapiens GN=NAALAD2 PE=1 SV=1;sp|O77564|FOLH1_PIG Glutamate carboxypeptidase 2 OS=Sus scrofa GN=FOLH1 PE=1 SV=1;sp|Q9CZR2|NALD2_MOUSE N-acetylated-alpha-linked acidic dipeptidase 2 OS=Mus musculus GN=Naalad2 PE=1 SV=2
ABAT	2.12336	2.24807	2.03623	1.71071	1.86953	2.00501	2.35681	2.33562	2.17872	2.21564	2.15921	2.18073	2.01258	2.3954	2.38979	1.982	2.11039	2.214	PREDICTED: 4-aminobutyrate aminotransferase, mitochondrial [Pelodiscus sinensis]	GO:0003824;GO:0008483;GO:0030170;GO:0009448;GO:0003867	catalytic activity;transaminase activity;pyridoxal phosphate binding;gamma-aminobutyric acid metabolic process;4-aminobutyrate transaminase activity	K13524	ABAT	http://www.genome.jp/dbget-bin/www_bget?ko:K13524	Alanine, aspartate and glutamate metabolism;Valine, leucine and isoleucine degradation;Butanoate metabolism;Propanoate metabolism;beta-Alanine metabolism;GABAergic synapse	ko00250,ko00280,ko00650,ko00640,ko00410,ko04727	KOG1401(E)(Acetylornithine aminotransferase)	gnl|BL_ORD_ID|8014;sp|P80404|GABT_HUMAN	sp|P80404|GABT_HUMAN 4-aminobutyrate aminotransferase, mitochondrial OS=Homo sapiens GN=ABAT PE=1 SV=3;sp|P80404|GABT_HUMAN 4-aminobutyrate aminotransferase, mitochondrial OS=Homo sapiens GN=ABAT PE=1 SV=3
ASPA	1.79671	1.83537	1.4603	1.0799	1.34044	1.55751	2.21264	2.087	1.63929	1.83008	1.77019	1.66876	1.75251	2.19465	2.21846	1.66361	1.83436	1.73767	PREDICTED: aspartoacylase isoform X1 [Pelodiscus sinensis];PREDICTED: aspartoacylase isoform X3 [Pelodiscus sinensis]	GO:0005737;GO:0070062;GO:0008152;GO:0005829;GO:0016788;GO:0016811;GO:0046872	cytoplasm;extracellular exosome;metabolic process;cytosol;hydrolase activity, acting on ester bonds;hydrolase activity, acting on carbon-nitrogen (but not peptide) bonds, in linear amides;metal ion binding	K01437	ASPA,aspA	http://www.genome.jp/dbget-bin/www_bget?ko:K01437	Alanine, aspartate and glutamate metabolism;Histidine metabolism	ko00250,ko00340	-	gnl|BL_ORD_ID|271141	sp|Q5R9E0|ACY2_PONAB Aspartoacylase OS=Pongo abelii GN=ASPA PE=2 SV=1
ASL	1.84429	1.98753	1.86646	2.17612	2.00199	2.10626	1.9805	1.95148	1.9689	2.27676	2.25921	1.98448	2.79636	2.15155	2.2408	2.15924	2.458	2.3448	PREDICTED: argininosuccinate lyase isoform X1 [Pelodiscus sinensis]<>XP_006113158.1 PREDICTED: argininosuccinate lyase isoform X2 [Pelodiscus sinensis]	GO:0006520;GO:0003824;GO:0042450;GO:0005212;GO:0009791;GO:0004056;GO:0019676;GO:0007626	cellular amino acid metabolic process;catalytic activity;arginine biosynthetic process via ornithine;structural constituent of eye lens;post-embryonic development;argininosuccinate lyase activity;ammonia assimilation cycle;locomotory behavior	K01755	argH,ASL	http://www.genome.jp/dbget-bin/www_bget?ko:K01755	Alanine, aspartate and glutamate metabolism;Arginine biosynthesis;Biosynthesis of amino acids	ko00250,ko00220,ko01230	KOG1316(E)(Argininosuccinate lyase)	sp|P24057|ARLY1_ANAPL;sp|P24058|ARLY2_ANAPL;gnl|BL_ORD_ID|286044;sp|P33110|ARLY_ANSAN	sp|P24057|ARLY1_ANAPL Delta-1 crystallin OS=Anas platyrhynchos GN=ASL1 PE=1 SV=1;sp|P24058|ARLY2_ANAPL Argininosuccinate lyase OS=Anas platyrhynchos GN=ASL2 PE=1 SV=4;sp|P24058|ARLY2_ANAPL Argininosuccinate lyase OS=Anas platyrhynchos GN=ASL2 PE=1 SV=4;sp|P33110|ARLY_ANSAN Argininosuccinate lyase OS=Anser anser anser GN=ASL PE=1 SV=1
ASS1	1.83353	1.34498	2.15409	1.3927	2.00608	1.73965	1.74044	1.82092	2.11965	2.42728	2.33203	2.19401	2.58683	2.22539	2.67173	2.41721	2.4715	2.88005	PREDICTED: argininosuccinate synthase [Pelodiscus sinensis]	GO:0005737;GO:0070062;GO:0042802;GO:0071418;GO:0071549;GO:0000050;GO:0005524;GO:1903038;GO:0071242;GO:0010046;GO:0006953;GO:0071230;GO:0043204;GO:0007494;GO:0032355;GO:0042493;GO:0044822;GO:0010043;GO:0001822;GO:0005741;GO:0005829;GO:0007584;GO:0001889;GO:0006531;GO:0060539;GO:0016597;GO:0015643;GO:0071346;GO:0071499;GO:0005764;GO:0045429;GO:0007568;GO:0000052;GO:0005783;GO:0004055;GO:0071222;GO:…	cytoplasm;extracellular exosome;identical protein binding;cellular response to amine stimulus;cellular response to dexamethasone stimulus;urea cycle;ATP binding;negative regulation of leukocyte cell-cell adhesion;cellular response to ammonium ion;response to mycotoxin;acute-phase response;cellular response to amino acid stimulus;perikaryon;midgut development;response to estradiol;response to drug…	K01940	argG,ASS1	http://www.genome.jp/dbget-bin/www_bget?ko:K01940	Alanine, aspartate and glutamate metabolism;Arginine biosynthesis;Biosynthesis of amino acids	ko00250,ko00220,ko01230	KOG1706(E)(Argininosuccinate synthase)	gnl|BL_ORD_ID|285053;sp|P00966|ASSY_HUMAN	sp|P00966|ASSY_HUMAN Argininosuccinate synthase OS=Homo sapiens GN=ASS1 PE=1 SV=2;sp|P00966|ASSY_HUMAN Argininosuccinate synthase OS=Homo sapiens GN=ASS1 PE=1 SV=2
ALDH4A1	2.41143	2.08106	2.22152	2.02808	2.37335	2.18517	2.72282	2.71704	2.62231	2.71363	2.70031	2.5814	2.12398	2.67623	2.63334	2.18033	2.38979	2.50312	PREDICTED: delta-1-pyrroline-5-carboxylate dehydrogenase, mitochondrial [Pelodiscus sinensis]	-	-	K00294	E1.2.1.88	http://www.genome.jp/dbget-bin/www_bget?ko:K00294	Alanine, aspartate and glutamate metabolism;Arginine and proline metabolism	ko00250,ko00330	KOG2455(E)(Delta-1-pyrroline-5-carboxylate dehydrogenase)	gnl|BL_ORD_ID|273218;sp|P30038|AL4A1_HUMAN	sp|P30038|AL4A1_HUMAN Delta-1-pyrroline-5-carboxylate dehydrogenase, mitochondrial OS=Homo sapiens GN=ALDH4A1 PE=1 SV=3;sp|P30038|AL4A1_HUMAN Delta-1-pyrroline-5-carboxylate dehydrogenase, mitochondrial OS=Homo sapiens GN=ALDH4A1 PE=1 SV=3
NIT2	1.91803	2.01017	1.89009	1.6826	1.93445	1.99269	2.43586	2.24957	2.10667	2.18013	2.04407	2.15528	1.96289	2.39782	2.42843	1.98417	2.0911	2.15036	PREDICTED: omega-amidase NIT2 [Pelodiscus sinensis]	GO:0005737;GO:0070062;GO:0006107;GO:0005739;GO:0050152;GO:0016810;GO:0006541;GO:0006528;GO:0006807;GO:0005813	cytoplasm;extracellular exosome;oxaloacetate metabolic process;mitochondrion;omega-amidase activity;hydrolase activity, acting on carbon-nitrogen (but not peptide) bonds;glutamine metabolic process;asparagine metabolic process;nitrogen compound metabolic process;centrosome	K13566	NIT2	http://www.genome.jp/dbget-bin/www_bget?ko:K13566	Alanine, aspartate and glutamate metabolism	ko00250	KOG0806(E)(Carbon-nitrogen hydrolase);KOG0807(E)(Carbon-nitrogen hydrolase)	sp|Q2T9R6|NIT2_BOVIN;gnl|BL_ORD_ID|109824	sp|Q2T9R6|NIT2_BOVIN Omega-amidase NIT2 OS=Bos taurus GN=NIT2 PE=2 SV=1;sp|Q2T9R6|NIT2_BOVIN Omega-amidase NIT2 OS=Bos taurus GN=NIT2 PE=2 SV=1
PTPN6	1.59362	1.60369	1.62665	1.51108	1.60606	1.60874	1.72032	1.65234	1.66229	1.67514	1.549	1.67861	1.59218	1.72509	1.79734	1.61993	1.69845	1.69609	PREDICTED: tyrosine-protein phosphatase non-receptor type 6 isoform X1 [Pelodiscus sinensis]<>XP_006124198.1 PREDICTED: tyrosine-protein phosphatase non-receptor type 6 isoform X1 [Pelodiscus sinensis];PREDICTED: tyrosine-protein phosphatase non-receptor type 6 isoform X2 [Pelodiscus sinensis]<>XP_014429579.1 PREDICTED: tyrosine-protein phosphatase non-receptor type 6 isoform X2 [Pelodiscus sinen…	GO:0005737;GO:0070062;GO:0045577;GO:0005730;GO:0017124;GO:0002924;GO:0004725;GO:0043407;GO:0019901;GO:0005911;GO:0008283;GO:0042105;GO:0005001;GO:0042169;GO:0008284;GO:2000045;GO:0016791;GO:0014068;GO:0001784;GO:0051279;GO:0030220;GO:0050853;GO:0016787;GO:0004721;GO:0005634	cytoplasm;extracellular exosome;regulation of B cell differentiation;nucleolus;SH3 domain binding;negative regulation of humoral immune response mediated by circulating immunoglobulin;protein tyrosine phosphatase activity;negative regulation of MAP kinase activity;protein kinase binding;cell-cell junction;cell proliferation;alpha-beta T cell receptor complex;transmembrane receptor protein tyrosin…	K05697	PTPN6,SHP-1	http://www.genome.jp/dbget-bin/www_bget?ko:K05697	Adherens junction;Jak-STAT signaling pathway;B cell receptor signaling pathway;Natural killer cell mediated cytotoxicity;T cell receptor signaling pathway	ko04520,ko04630,ko04662,ko04650,ko04660	KOG0790(T)(Protein tyrosine phosphatase Corkscrew and related SH2 domain enzymes)	sp|P29350|PTN6_HUMAN;gnl|BL_ORD_ID|437727	sp|P29350|PTN6_HUMAN Tyrosine-protein phosphatase non-receptor type 6 OS=Homo sapiens GN=PTPN6 PE=1 SV=1;sp|P29350|PTN6_HUMAN Tyrosine-protein phosphatase non-receptor type 6 OS=Homo sapiens GN=PTPN6 PE=1 SV=1
LOC102459418	1.95809	1.96407	2.16002	2.26647	2.17566	2.25547	1.87898	1.84242	2.07427	1.84011	1.97731	1.87892	2.12992	1.99092	2.04953	2.19769	2.13149	2.15152	PREDICTED: receptor-type tyrosine-protein phosphatase F isoform X4 [Heterocephalus glaber]	-	-	K05695	PTPRF,LAR	http://www.genome.jp/dbget-bin/www_bget?ko:K05695	Adherens junction;Cell adhesion molecules (CAMs);Insulin signaling pathway	ko04520,ko04514,ko04910	-	gnl|BL_ORD_ID|443127	sp|A7MBJ4|PTPRF_BOVIN Receptor-type tyrosine-protein phosphatase F OS=Bos taurus GN=PTPRF PE=2 SV=1
LOC102455872	1.85866	1.83251	1.73846	1.82354	1.85009	2.01662	2.14842	2.1829	2.18136	2.13453	2.17044	2.13697	2.15954	2.30552	2.20262	2.07144	2.04309	2.15969	PREDICTED: cadherin-1 [Pelodiscus sinensis]	-	-	K05689	CDHE,CDH1	http://www.genome.jp/dbget-bin/www_bget?ko:K05689	Adherens junction;Apelin signaling pathway;Hippo signaling pathway;Rap1 signaling pathway;Cell adhesion molecules (CAMs)	ko04520,ko04371,ko04390,ko04015,ko04514	-	sp|P33145|CADHK_CHICK;gnl|BL_ORD_ID|312082;sp|P08641|CADH1_CHICK	sp|P33145|CADHK_CHICK B-cadherin (Fragment) OS=Gallus gallus GN=K-CAM PE=2 SV=1;sp|P08641|CADH1_CHICK Cadherin-1 OS=Gallus gallus GN=CDH1 PE=1 SV=2;sp|P08641|CADH1_CHICK Cadherin-1 OS=Gallus gallus GN=CDH1 PE=1 SV=2
ABCC12	1.57749	1.69767	1.49262	1.44091	1.60195	1.35102	1.83238	1.76989	1.81875	1.80085	1.69338	1.52101	1.85425	2.04438	2.1181	1.87835	1.97202	1.95134	PREDICTED: multidrug resistance-associated protein 9 [Pelodiscus sinensis]	-	-	K05672	ABCC12	http://www.genome.jp/dbget-bin/www_bget?ko:K05672	ABC transporters	ko02010	KOG0054(Q)(Multidrug resistance-associated protein/mitoxantrone resistance protein, ABC superfamily)	sp|Q96J65|MRP9_HUMAN;gnl|BL_ORD_ID|98431;sp|Q80WJ6|MRP9_MOUSE	sp|Q96J65|MRP9_HUMAN Multidrug resistance-associated protein 9 OS=Homo sapiens GN=ABCC12 PE=1 SV=2;sp|Q80WJ6|MRP9_MOUSE Multidrug resistance-associated protein 9 OS=Mus musculus GN=Abcc12 PE=2 SV=1;sp|Q80WJ6|MRP9_MOUSE Multidrug resistance-associated protein 9 OS=Mus musculus GN=Abcc12 PE=2 SV=1
ABHD17A	1.70663	1.51215	1.63114	2.12317	2.2089	2.06729	2.06681	1.99961	2.01828	1.93171	2.03663	2.00565	2.27533	2.29086	2.28035	2.19487	2.11488	2.3137	PREDICTED: alpha/beta hydrolase domain-containing protein 17A isoform X2 [Pelodiscus sinensis]<>XP_014431967.1 PREDICTED: alpha/beta hydrolase domain-containing protein 17A isoform X1 [Pelodiscus sinensis]	GO:0016020	membrane	-	-	-	-	-	KOG1552(R)(Predicted alpha/beta hydrolase)	gnl|BL_ORD_ID|265936;sp|Q99JW1|AB17A_MOUSE;sp|Q96GS6|AB17A_HUMAN	sp|Q5XIJ5|AB17A_RAT Protein ABHD17A OS=Rattus norvegicus GN=Abhd17a PE=2 SV=1;sp|Q99JW1|AB17A_MOUSE Protein ABHD17A OS=Mus musculus GN=Abhd17a PE=1 SV=1;sp|Q96GS6|AB17A_HUMAN Protein ABHD17A OS=Homo sapiens GN=ABHD17A PE=1 SV=1
ABT1	1.74617	1.55835	1.65639	2.05457	1.9922	1.98784	1.78972	1.80414	1.80963	1.77815	1.82387	1.85382	1.84323	1.73568	1.73143	1.83251	1.82178	1.79831	PREDICTED: activator of basal transcription 1 [Pelodiscus sinensis]	GO:0000472;GO:0000447;GO:0005730;GO:0044822;GO:0034462;GO:0003723;GO:0005667;GO:0000480;GO:0000166;GO:0021522;GO:0006357;GO:0006366	endonucleolytic cleavage to generate mature 5'-end of SSU-rRNA from (SSU-rRNA, 5.8S rRNA, LSU-rRNA);endonucleolytic cleavage in ITS1 to separate SSU-rRNA from 5.8S rRNA and LSU-rRNA from tricistronic rRNA transcript (SSU-rRNA, 5.8S rRNA, LSU-rRNA);nucleolus;RNA binding;small-subunit processome assembly;RNA binding;transcription factor complex;endonucleolytic cleavage in 5'-ETS of tricistronic rRN…	K14785	ESF2,ABT1	http://www.genome.jp/dbget-bin/www_bget?ko:K14785	-	-	KOG3152(K)(TBP-binding protein, activator of basal transcription (contains rrm motif))	gnl|BL_ORD_ID|264606;sp|Q4KLM5|ABT1_RAT	sp|Q4KLM5|ABT1_RAT Activator of basal transcription 1 OS=Rattus norvegicus GN=Abt1 PE=1 SV=1;sp|Q4KLM5|ABT1_RAT Activator of basal transcription 1 OS=Rattus norvegicus GN=Abt1 PE=1 SV=1
ACOT13	2.22081	2.266	2.14557	1.97713	2.09219	2.19363	2.27351	2.28264	2.27891	2.27432	2.19385	2.16298	2.19546	2.53363	2.39883	2.19568	2.33431	2.32597	PREDICTED: acyl-coenzyme A thioesterase 13 isoform X1 [Pelodiscus sinensis]<>XP_006134060.1 PREDICTED: acyl-coenzyme A thioesterase 13 isoform X2 [Pelodiscus sinensis]	GO:0070062;GO:0005739;GO:0047617;GO:0051289;GO:0005634	extracellular exosome;mitochondrion;acyl-CoA hydrolase activity;protein homotetramerization;nucleus	K17362	ACOT13	http://www.genome.jp/dbget-bin/www_bget?ko:K17362	-	-	KOG3328(R)(HGG motif-containing thioesterase)	gnl|BL_ORD_ID|264779	sp|Q5R833|ACO13_PONAB Acyl-coenzyme A thioesterase 13 OS=Pongo abelii GN=ACOT13 PE=2 SV=1
ACP6	1.64355	1.4417	1.54839	1.53403	1.53504	1.47261	1.69827	1.61553	1.71592	1.64207	1.62045	1.57183	1.7129	1.91477	1.966	1.74178	1.77561	1.81578	PREDICTED: lysophosphatidic acid phosphatase type 6 [Pelodiscus sinensis]	GO:0003993	acid phosphatase activity	K14395	ACP6	http://www.genome.jp/dbget-bin/www_bget?ko:K14395	-	-	KOG3720(I)(Lysosomal & prostatic acid phosphatases)	gnl|BL_ORD_ID|137350;sp|Q9NPH0|PPA6_HUMAN	sp|Q9NPH0|PPA6_HUMAN Lysophosphatidic acid phosphatase type 6 OS=Homo sapiens GN=ACP6 PE=1 SV=2;sp|Q9NPH0|PPA6_HUMAN Lysophosphatidic acid phosphatase type 6 OS=Homo sapiens GN=ACP6 PE=1 SV=2
ADAT3	1.69723	1.66792	1.83506	2.05138	1.96848	1.978	1.46419	1.44871	1.66143	1.45758	1.55096	1.49679	1.72296	1.61384	1.65196	1.77532	1.80489	1.79782	PREDICTED: probable inactive tRNA-specific adenosine deaminase-like protein 3 [Pelodiscus sinensis]	-	-	K15442	TAD3,ADAT3	http://www.genome.jp/dbget-bin/www_bget?ko:K15442	-	-	KOG1018(F)(Cytosine deaminase FCY1 and related enzymes)	gnl|BL_ORD_ID|272365	sp|Q96EY9|ADAT3_HUMAN Probable inactive tRNA-specific adenosine deaminase-like protein 3 OS=Homo sapiens GN=ADAT3 PE=1 SV=1
ADGRG1	1.66087	1.63739	1.70766	1.62449	1.63659	1.69082	1.84429	1.83033	1.80672	1.95352	1.77173	1.6149	1.7629	1.93394	1.75205	1.82827	1.67486	1.67431	PREDICTED: G-protein coupled receptor 56 [Pelodiscus sinensis]	-	-	K08450	GPR56	http://www.genome.jp/dbget-bin/www_bget?ko:K08450	-	-	KOG4193(T)(G protein-coupled receptors)	sp|Q50DM8|AGRG1_MACMU;gnl|BL_ORD_ID|273819;sp|Q50DM5|AGRG1_PONPY;sp|Q8K209|AGRG1_MOUSE	sp|Q50DM8|AGRG1_MACMU Adhesion G-protein coupled receptor G1 OS=Macaca mulatta GN=ADGRG1 PE=2 SV=1;sp|Q8K209|AGRG1_MOUSE Adhesion G-protein coupled receptor G1 OS=Mus musculus GN=Adgrg1 PE=1 SV=1;sp|Q50DM5|AGRG1_PONPY Adhesion G-protein coupled receptor G1 OS=Pongo pygmaeus GN=ADGRG1 PE=3 SV=1;sp|Q8K209|AGRG1_MOUSE Adhesion G-protein coupled receptor G1 OS=Mus musculus GN=Adgrg1 PE=1 SV=1
AES	1.8687	1.83276	1.93887	2.2599	2.28244	2.2205	2.33391	2.33862	2.35365	2.35557	2.36975	2.37014	2.40033	2.3064	2.27439	2.35438	2.29088	2.34784	PREDICTED: amino-terminal enhancer of split [Egretta garzetta];PREDICTED: amino-terminal enhancer of split isoform X1 [Gallus gallus];PREDICTED: amino-terminal enhancer of split isoform X3 [Gallus gallus];PREDICTED: amino-terminal enhancer of split, partial [Pelodiscus sinensis];PREDICTED: amino-terminal enhancer of split-like [Galeopterus variegatus]	GO:0032091;GO:0070555;GO:0005654;GO:0016055;GO:0000122;GO:2000210;GO:0009887;GO:0045892;GO:0007275;GO:0003714;GO:0031668;GO:0060761;GO:0090090;GO:0006351;GO:0001501;GO:0040008;GO:0005515;GO:0006355;GO:0010629;GO:0006357;GO:0005634	negative regulation of protein binding;response to interleukin-1;nucleoplasm;Wnt signaling pathway;negative regulation of transcription from RNA polymerase II promoter;positive regulation of anoikis;animal organ morphogenesis;negative regulation of transcription, DNA-templated;multicellular organism development;transcription corepressor activity;cellular response to extracellular stimulus;negativ…	-	-	-	-	-	KOG0639(B)(Transducin-like enhancer of split protein (contains WD40 repeats))	gnl|BL_ORD_ID|273043;sp|Q08117|AES_HUMAN	sp|Q08117|AES_HUMAN Amino-terminal enhancer of split OS=Homo sapiens GN=AES PE=1 SV=4;sp|Q08117|AES_HUMAN Amino-terminal enhancer of split OS=Homo sapiens GN=AES PE=1 SV=4
AGTRAP	1.79134	1.76065	1.71625	1.68269	1.77728	1.7605	1.91132	1.90309	2.00766	2.00043	1.765	1.86016	1.95885	2.00608	2.16194	2.10054	2.06438	2.11975	PREDICTED: type-1 angiotensin II receptor-associated protein [Pelodiscus sinensis]	-	-	-	-	-	-	-	-	sp|Q5EBF8|ATRAP_XENTR;gnl|BL_ORD_ID|301036	sp|Q5EBF8|ATRAP_XENTR Type-1 angiotensin II receptor-associated protein-like OS=Xenopus tropicalis GN=agtrap PE=2 SV=1;sp|Q5EBF8|ATRAP_XENTR Type-1 angiotensin II receptor-associated protein-like OS=Xenopus tropicalis GN=agtrap PE=2 SV=1
AIP	1.58535	1.48954	1.51917	1.95395	1.96218	1.9196	1.90934	1.88412	1.95197	1.89856	1.94503	1.95139	1.93561	1.90151	1.90988	1.89537	1.89081	1.93166	PREDICTED: AH receptor-interacting protein [Pelodiscus sinensis]	GO:0016020;GO:0005737;GO:0017162;GO:0006457;GO:0005654;GO:0006805;GO:0006626;GO:0022417;GO:0005829;GO:0003712;GO:0005886;GO:0036004;GO:1903506;GO:0051082;GO:0034751	membrane;cytoplasm;aryl hydrocarbon receptor binding;protein folding;nucleoplasm;xenobiotic metabolic process;protein targeting to mitochondrion;protein maturation by protein folding;cytosol;transcription cofactor activity;plasma membrane;GAF domain binding;regulation of nucleic acid-templated transcription;unfolded protein binding;aryl hydrocarbon receptor complex	K17767	AIP,XAP2	http://www.genome.jp/dbget-bin/www_bget?ko:K17767	-	-	KOG0543(O)(FKBP-type peptidyl-prolyl cis-trans isomerase)	sp|Q5FWY5|AIP_RAT;gnl|BL_ORD_ID|276928	sp|Q5FWY5|AIP_RAT AH receptor-interacting protein OS=Rattus norvegicus GN=Aip PE=1 SV=1;sp|Q5FWY5|AIP_RAT AH receptor-interacting protein OS=Rattus norvegicus GN=Aip PE=1 SV=1
AMN	1.91424	1.97557	1.83828	1.68151	1.6696	1.62961	1.89851	1.85558	1.89669	2.07405	1.68824	1.79706	2.05223	2.07871	2.44798	1.82491	2.27701	1.88332	PREDICTED: protein amnionless [Pelodiscus sinensis]	GO:0070062;GO:0008104;GO:0045177;GO:0016324;GO:0005102;GO:0030139;GO:0006898;GO:0015889;GO:0016021;GO:0007588;GO:0016020;GO:0005615;GO:0043001	extracellular exosome;protein localization;apical part of cell;apical plasma membrane;receptor binding;endocytic vesicle;receptor-mediated endocytosis;cobalamin transport;integral component of membrane;excretion;membrane;extracellular space;Golgi to plasma membrane protein transport	K18259	AMN	http://www.genome.jp/dbget-bin/www_bget?ko:K18259	-	-	-	gnl|BL_ORD_ID|280610;sp|Q6UKI2|AMNLS_CANLF	sp|Q6UKI2|AMNLS_CANLF Protein amnionless OS=Canis lupus familiaris GN=AMN PE=2 SV=1;sp|Q6UKI2|AMNLS_CANLF Protein amnionless OS=Canis lupus familiaris GN=AMN PE=2 SV=1
ANKRD13D	1.2033	1.21192	1.31133	1.60509	1.57148	1.59682	1.38775	1.45423	1.50024	1.46045	1.45102	1.49748	1.51627	1.41614	1.44138	1.53719	1.49388	1.54974	PREDICTED: ankyrin repeat domain-containing protein 13D [Pelodiscus sinensis]	-	-	-	-	-	-	-	KOG0522(R)(Ankyrin repeat protein)	sp|Q6ZTN6|AN13D_HUMAN;gnl|BL_ORD_ID|274154	sp|Q6ZTN6|AN13D_HUMAN Ankyrin repeat domain-containing protein 13D OS=Homo sapiens GN=ANKRD13D PE=1 SV=2;sp|Q6ZTN6|AN13D_HUMAN Ankyrin repeat domain-containing protein 13D OS=Homo sapiens GN=ANKRD13D PE=1 SV=2
ANXA1	2.07273	2.33905	2.45908	2.212	1.96965	2.26968	2.01674	2.19507	2.16164	2.28461	2.04883	2.24544	2.50524	2.37623	2.16161	2.37751	2.33901	2.20033	PREDICTED: annexin A1 [Pelodiscus sinensis]	GO:0005737;GO:0070062;GO:0005654;GO:0008360;GO:0090303;GO:0005886;GO:0031532;GO:0046883;GO:0002685;GO:0005509;GO:0045920;GO:0016324;GO:0042127;GO:0018149;GO:0004859;GO:0048306;GO:0005768;GO:0005544;GO:0071385;GO:0045629;GO:0019898;GO:0005925;GO:0019834;GO:0031232;GO:0016328;GO:0005198;GO:0030674	cytoplasm;extracellular exosome;nucleoplasm;regulation of cell shape;positive regulation of wound healing;plasma membrane;actin cytoskeleton reorganization;regulation of hormone secretion;regulation of leukocyte migration;calcium ion binding;negative regulation of exocytosis;apical plasma membrane;regulation of cell proliferation;peptide cross-linking;phospholipase inhibitor activity;calcium-depe…	K17091	ANXA1	http://www.genome.jp/dbget-bin/www_bget?ko:K17091	-	-	KOG0819(U)(Annexin)	gnl|BL_ORD_ID|280777;sp|P14087|ANXA1_CAVCU;sp|Q92040|ANX12_COLLI	sp|P14087|ANXA1_CAVCU Annexin A1 OS=Cavia cutleri GN=ANXA1 PE=1 SV=1;sp|P14087|ANXA1_CAVCU Annexin A1 OS=Cavia cutleri GN=ANXA1 PE=1 SV=1;sp|Q92040|ANX12_COLLI Annexin A1 isoform p37 OS=Columba livia GN=CP37 PE=1 SV=1
ANXA11	1.74304	1.98	1.86475	1.65963	1.65514	1.77786	1.83923	1.82478	1.89531	1.90331	1.85003	1.83879	1.84386	1.87373	1.80699	1.86463	1.81171	1.81111	PREDICTED: annexin A11 isoform X2 [Haliaeetus leucocephalus];PREDICTED: LOW QUALITY PROTEIN: annexin A11 [Pelodiscus sinensis]	GO:0005509;GO:0005544	calcium ion binding;calcium-dependent phospholipid binding	K17095	ANXA7_11	http://www.genome.jp/dbget-bin/www_bget?ko:K17095	-	-	KOG0819(U)(Annexin)	sp|P33477|ANX11_RABIT;sp|P27214|ANX11_BOVIN;gnl|BL_ORD_ID|275219;sp|P97384|ANX11_MOUSE	sp|P33477|ANX11_RABIT Annexin A11 OS=Oryctolagus cuniculus GN=ANXA11 PE=1 SV=1;sp|P27214|ANX11_BOVIN Annexin A11 OS=Bos taurus GN=ANXA11 PE=1 SV=1;sp|P27214|ANX11_BOVIN Annexin A11 OS=Bos taurus GN=ANXA11 PE=1 SV=1;sp|P97384|ANX11_MOUSE Annexin A11 OS=Mus musculus GN=Anxa11 PE=1 SV=2
ANXA2	2.17058	2.23401	2.36754	2.12753	2.21835	2.35641	2.29308	2.33562	2.31186	2.4867	2.35917	2.41273	2.53581	2.59629	2.3845	2.60293	2.46966	2.4334	PREDICTED: annexin A2 [Pelodiscus sinensis]	GO:2000273;GO:0030199;GO:0005737;GO:0005769;GO:0005765;GO:0042730;GO:0035749;GO:0001525;GO:0008092;GO:0051099;GO:0019897;GO:0030496;GO:0043086;GO:0005886;GO:0005509;GO:0002091;GO:0004859;GO:0048306;GO:0044822;GO:0045121;GO:0044548;GO:0005544;GO:0005829;GO:0001765;GO:1900121;GO:0016020;GO:0030546;GO:0005546;GO:0002020;GO:0036035	positive regulation of receptor activity;collagen fibril organization;cytoplasm;early endosome;lysosomal membrane;fibrinolysis;myelin sheath adaxonal region;angiogenesis;cytoskeletal protein binding;positive regulation of binding;extrinsic component of plasma membrane;midbody;negative regulation of catalytic activity;plasma membrane;calcium ion binding;negative regulation of receptor internalizat…	K17092	ANXA2	http://www.genome.jp/dbget-bin/www_bget?ko:K17092	-	-	KOG0819(U)(Annexin)	sp|P17785|ANXA2_CHICK;gnl|BL_ORD_ID|283533	sp|P17785|ANXA2_CHICK Annexin A2 OS=Gallus gallus GN=ANXA2 PE=1 SV=2;sp|P17785|ANXA2_CHICK Annexin A2 OS=Gallus gallus GN=ANXA2 PE=1 SV=2
ANXA4	1.24527	1.55883	1.54419	1.32695	1.31869	1.45209	1.64008	1.51481	1.61878	1.7273	1.63094	1.58172	1.76604	2.25597	1.91855	1.70044	1.82007	1.86593	PREDICTED: annexin A4 [Pelodiscus sinensis]<>XP_006119145.1 PREDICTED: annexin A4 [Pelodiscus sinensis]	GO:0032088;GO:0070062;GO:0031965;GO:0042802;GO:0007219;GO:0005886;GO:0005509;GO:0030855;GO:0048306;GO:0048471;GO:0005544;GO:0051059;GO:2000483;GO:0012506;GO:0006357;GO:0005634;GO:0009986	negative regulation of NF-kappaB transcription factor activity;extracellular exosome;nuclear membrane;identical protein binding;Notch signaling pathway;plasma membrane;calcium ion binding;epithelial cell differentiation;calcium-dependent protein binding;perinuclear region of cytoplasm;calcium-dependent phospholipid binding;NF-kappaB binding;negative regulation of interleukin-8 secretion;vesicle m…	K17093	ANXA4	http://www.genome.jp/dbget-bin/www_bget?ko:K17093	-	-	KOG0819(U)(Annexin)	sp|P13214|ANXA4_BOVIN;gnl|BL_ORD_ID|283534	sp|P13214|ANXA4_BOVIN Annexin A4 OS=Bos taurus GN=ANXA4 PE=1 SV=2;sp|P13214|ANXA4_BOVIN Annexin A4 OS=Bos taurus GN=ANXA4 PE=1 SV=2
ANXA5	2.23333	2.25559	2.12071	1.98204	2.05477	2.21733	2.22871	2.28753	2.34502	2.41312	2.32762	2.30033	2.22647	2.44679	2.51803	2.35648	2.3118	2.27295	PREDICTED: annexin A5 [Pelodiscus sinensis]<>XP_006125650.1 PREDICTED: annexin A5 [Pelodiscus sinensis]	GO:0009897;GO:0070062;GO:0005622;GO:0098779;GO:0005509;GO:0098792;GO:0005544;GO:0010033;GO:0002230;GO:0050819;GO:0016020;GO:0005925;GO:0072563	external side of plasma membrane;extracellular exosome;intracellular;positive regulation of macromitophagy in response to mitochondrial depolarization;calcium ion binding;xenophagy;calcium-dependent phospholipid binding;response to organic substance;positive regulation of defense response to virus by host;negative regulation of coagulation;membrane;focal adhesion;endothelial microparticle	K16646	ANXA5	http://www.genome.jp/dbget-bin/www_bget?ko:K16646	-	-	KOG0819(U)(Annexin)	sp|P17153|ANXA5_CHICK;gnl|BL_ORD_ID|275702	sp|P17153|ANXA5_CHICK Annexin A5 OS=Gallus gallus GN=ANXA5 PE=1 SV=2;sp|P17153|ANXA5_CHICK Annexin A5 OS=Gallus gallus GN=ANXA5 PE=1 SV=2
APBA3	1.52853	1.53314	1.63839	1.88241	1.85715	1.96759	1.44498	1.46464	1.67449	1.44028	1.576	1.5302	1.85812	1.7264	1.90966	1.95775	1.71416	1.84522	PREDICTED: amyloid beta A4 precursor protein-binding family A member 3 [Pelodiscus sinensis]	GO:0043086;GO:0050790;GO:0048471;GO:0007268;GO:0010468;GO:0004857;GO:0001540;GO:0019899	negative regulation of catalytic activity;regulation of catalytic activity;perinuclear region of cytoplasm;chemical synaptic transmission;regulation of gene expression;enzyme inhibitor activity;amyloid-beta binding;enzyme binding	-	-	-	-	-	KOG3209(R)(WW domain-containing protein);KOG3605(R)(Beta amyloid precursor-binding protein)	sp|O35430|APBA1_RAT;gnl|BL_ORD_ID|282260;sp|O96018|APBA3_HUMAN	sp|O35430|APBA1_RAT Amyloid beta A4 precursor protein-binding family A member 1 OS=Rattus norvegicus GN=Apba1 PE=1 SV=1;sp|O96018|APBA3_HUMAN Amyloid beta A4 precursor protein-binding family A member 3 OS=Homo sapiens GN=APBA3 PE=1 SV=1;sp|O96018|APBA3_HUMAN Amyloid beta A4 precursor protein-binding family A member 3 OS=Homo sapiens GN=APBA3 PE=1 SV=1
APLP2	2.37411	2.41159	2.31374	2.20507	2.32037	2.27866	2.63795	2.5907	2.62147	2.65165	2.59352	2.51155	2.36199	2.51378	2.41599	2.43992	2.39643	2.44943	PREDICTED: amyloid-like protein 2 isoform X4 [Pelodiscus sinensis];PREDICTED: amyloid-like protein 2 isoform X3 [Pelodiscus sinensis];PREDICTED: amyloid-like protein 2 isoform X1 [Pelodiscus sinensis];PREDICTED: amyloid-like protein 2 isoform X2 [Pelodiscus sinensis]	-	-	K08117	APLP2	http://www.genome.jp/dbget-bin/www_bget?ko:K08117	-	-	KOG3540(R)(Beta amyloid precursor protein)	gnl|BL_ORD_ID|276838;gnl|BL_ORD_ID|278268;sp|Q06481|APLP2_HUMAN	sp|Q06335|APLP2_MOUSE Amyloid-like protein 2 OS=Mus musculus GN=Aplp2 PE=1 SV=4;sp|Q06481|APLP2_HUMAN Amyloid-like protein 2 OS=Homo sapiens GN=APLP2 PE=1 SV=2;sp|Q06481|APLP2_HUMAN Amyloid-like protein 2 OS=Homo sapiens GN=APLP2 PE=1 SV=2
ARHGAP1	1.41397	1.45301	1.42226	1.40054	1.50691	1.42878	1.63185	1.56324	1.63729	1.68404	1.62992	1.64108	1.56241	1.91084	1.87645	1.6535	1.62366	1.83072	PREDICTED: rho GTPase-activating protein 1 [Pelodiscus sinensis]	-	-	K18470	ARHGAP1,CDC42GAP	http://www.genome.jp/dbget-bin/www_bget?ko:K18470	-	-	KOG4406(TZ)(CDC42 Rho GTPase-activating protein)	gnl|BL_ORD_ID|163655;sp|Q5FWK3|RHG01_MOUSE	sp|Q5FWK3|RHG01_MOUSE Rho GTPase-activating protein 1 OS=Mus musculus GN=Arhgap1 PE=1 SV=1;sp|Q5FWK3|RHG01_MOUSE Rho GTPase-activating protein 1 OS=Mus musculus GN=Arhgap1 PE=1 SV=1
ARHGAP24	1.67761	1.68565	1.41564	1.40002	1.43616	1.58737	1.72501	1.74406	1.73456	1.7457	1.73576	1.64572	1.70995	1.83569	1.97617	1.87651	1.85455	1.90886	PREDICTED: rho GTPase-activating protein 24 isoform X1 [Pelodiscus sinensis];PREDICTED: rho GTPase-activating protein 24 isoform X3 [Pelodiscus sinensis];PREDICTED: rho GTPase-activating protein 24 isoform X2 [Pelodiscus sinensis]	GO:0007165;GO:0005096	signal transduction;GTPase activator activity	-	-	-	-	-	KOG1453(T)(Chimaerin and related Rho GTPase activating proteins)	sp|Q5U2Z7|RHG24_RAT;sp|Q8N264|RHG24_HUMAN;gnl|BL_ORD_ID|166955;gnl|BL_ORD_ID|156244	sp|Q5U2Z7|RHG24_RAT Rho GTPase-activating protein 24 OS=Rattus norvegicus GN=Arhgap24 PE=1 SV=2;sp|Q8N264|RHG24_HUMAN Rho GTPase-activating protein 24 OS=Homo sapiens GN=ARHGAP24 PE=1 SV=2;sp|Q5U2Z7|RHG24_RAT Rho GTPase-activating protein 24 OS=Rattus norvegicus GN=Arhgap24 PE=1 SV=2;sp|Q8N264|RHG24_HUMAN Rho GTPase-activating protein 24 OS=Homo sapiens GN=ARHGAP24 PE=1 SV=2
ARL4D	1.42325	1.1784	1.2335	1.72239	1.5934	1.67651	1.455	1.44217	1.44248	1.36624	1.48911	1.52724	1.63969	1.32056	1.16554	1.63286	1.50284	1.5244	PREDICTED: ADP-ribosylation factor-like protein 4D [Pelodiscus sinensis]	GO:0005737;GO:0005622;GO:0007264;GO:0005886;GO:0000166;GO:0005525;GO:0005634	cytoplasm;intracellular;small GTPase mediated signal transduction;plasma membrane;nucleotide binding;GTP binding;nucleus	K07945	ARL4	http://www.genome.jp/dbget-bin/www_bget?ko:K07945	-	-	KOG0071(U)(GTP-binding ADP-ribosylation factor Arf6 (dArf3))	gnl|BL_ORD_ID|289213	sp|Q0VC18|ARL4D_BOVIN ADP-ribosylation factor-like protein 4D OS=Bos taurus GN=ARL4D PE=2 SV=1
ARL9	1.81325	1.84398	1.90966	1.83985	1.82969	1.72024	1.90222	1.8379	1.81697	1.82249	1.86558	1.79176	1.92686	2.02065	2.1378	1.92132	1.98268	2.05019	PREDICTED: ADP-ribosylation factor-like protein 9 [Pelodiscus sinensis]	GO:0005622;GO:0007264;GO:0000166;GO:0005525	intracellular;small GTPase mediated signal transduction;nucleotide binding;GTP binding	K07957	ARL9	http://www.genome.jp/dbget-bin/www_bget?ko:K07957	-	-	KOG0071(U)(GTP-binding ADP-ribosylation factor Arf6 (dArf3))	sp|Q6T311|ARL9_HUMAN;gnl|BL_ORD_ID|288289	sp|Q6T311|ARL9_HUMAN ADP-ribosylation factor-like protein 9 OS=Homo sapiens GN=ARL9 PE=2 SV=1;sp|Q6T311|ARL9_HUMAN ADP-ribosylation factor-like protein 9 OS=Homo sapiens GN=ARL9 PE=2 SV=1
ASNA1	1.51996	1.31091	1.35218	1.78625	1.82465	1.74084	1.76238	1.66624	1.74084	1.75143	1.75082	1.76373	1.55727	1.63246	1.64924	1.61162	1.55328	1.6026	PREDICTED: ATPase ASNA1 [Pelodiscus sinensis]	GO:0005783;GO:0005737;GO:0016787;GO:0016887;GO:0070062;GO:0005524;GO:0045048;GO:0005730;GO:0000166;GO:0006810;GO:0005634;GO:0046872	endoplasmic reticulum;cytoplasm;hydrolase activity;ATPase activity;extracellular exosome;ATP binding;protein insertion into ER membrane;nucleolus;nucleotide binding;transport;nucleus;metal ion binding	K01551	arsA,ASNA1	http://www.genome.jp/dbget-bin/www_bget?ko:K01551	-	-	KOG2825(P)(Putative arsenite-translocating ATPase)	gnl|BL_ORD_ID|289670;sp|O54984|ASNA_MOUSE	sp|O54984|ASNA_MOUSE ATPase Asna1 OS=Mus musculus GN=Asna1 PE=1 SV=2;sp|O54984|ASNA_MOUSE ATPase Asna1 OS=Mus musculus GN=Asna1 PE=1 SV=2
ASPDH	1.59084	1.41697	1.61595	2.05835	1.9882	1.98019	1.55206	1.68966	1.75266	1.65992	1.799	1.4679	1.93872	2.25353	2.26923	1.75671	1.81617	1.91824	PREDICTED: putative L-aspartate dehydrogenase [Pelodiscus sinensis]	GO:0009435;GO:0050661;GO:0006742;GO:0019363;GO:0055114;GO:0016491;GO:0033735	NAD biosynthetic process;NADP binding;NADP catabolic process;pyridine nucleotide biosynthetic process;oxidation-reduction process;oxidoreductase activity;aspartate dehydrogenase activity	-	-	-	-	-	-	gnl|BL_ORD_ID|298431	sp|Q5FW48|ASPD_XENTR Putative L-aspartate dehydrogenase OS=Xenopus tropicalis GN=aspdh PE=2 SV=1
ATP5SL	2.08998	1.99449	2.11391	2.26233	2.13268	2.29119	1.89365	1.97598	2.09454	1.88829	1.86764	1.85582	2.14007	1.95323	2.0463	2.07265	2.24331	2.10185	PREDICTED: ATP synthase subunit s-like protein, partial [Pelodiscus sinensis]	-	-	K09649	PRSS16	http://www.genome.jp/dbget-bin/www_bget?ko:K09649	-	-	KOG2183(OR)(Prolylcarboxypeptidase (angiotensinase C));KOG1947(R)(Leucine rich repeat proteins, some proteins contain F-box)	sp|Q9NQE7|TSSP_HUMAN;sp|Q4R5F9|AT5SL_MACFA;sp|A6QNS9|AT5SL_BOVIN;gnl|BL_ORD_ID|288987	sp|Q9NQE7|TSSP_HUMAN Thymus-specific serine protease OS=Homo sapiens GN=PRSS16 PE=2 SV=2;sp|Q4R5F9|AT5SL_MACFA ATP synthase subunit s-like protein OS=Macaca fascicularis GN=ATP5SL PE=2 SV=1;sp|A6QNS9|AT5SL_BOVIN ATP synthase subunit s-like protein OS=Bos taurus GN=ATP5SL PE=2 SV=2;sp|A6QNS9|AT5SL_BOVIN ATP synthase subunit s-like protein OS=Bos taurus GN=ATP5SL PE=2 SV=2
ATRAID	1.55315	1.2584	1.35122	1.4685	1.65186	1.19117	1.86028	1.7421	1.70062	1.93339	1.65292	1.66624	1.55437	1.91913	1.76678	1.55509	1.92634	1.70927	PREDICTED: LOW QUALITY PROTEIN: all-trans retinoic acid-induced differentiation factor [Pelodiscus sinensis]	GO:0005765;GO:0045669;GO:0033689;GO:0048471;GO:0016021;GO:0016020;GO:0010468;GO:0005635;GO:0030501	lysosomal membrane;positive regulation of osteoblast differentiation;negative regulation of osteoblast proliferation;perinuclear region of cytoplasm;integral component of membrane;membrane;regulation of gene expression;nuclear envelope;positive regulation of bone mineralization	-	-	-	-	-	-	gnl|BL_ORD_ID|287228;sp|Q6PGD0|ARAID_MOUSE	sp|Q6PGD0|ARAID_MOUSE All-trans retinoic acid-induced differentiation factor OS=Mus musculus GN=Atraid PE=2 SV=2;sp|Q6PGD0|ARAID_MOUSE All-trans retinoic acid-induced differentiation factor OS=Mus musculus GN=Atraid PE=2 SV=2
ATXN2L	1.57657	1.50447	1.57438	1.92983	1.86136	1.79727	1.50907	1.51202	1.61805	1.52789	1.57345	1.5867	1.50623	1.46864	1.49318	1.54986	1.47056	1.56526	PREDICTED: ataxin-2-like protein isoform X4 [Pelodiscus sinensis];PREDICTED: ataxin-2-like protein isoform X1 [Pelodiscus sinensis];PREDICTED: ataxin-2-like protein isoform X3 [Pelodiscus sinensis]	-	-	-	-	-	-	-	-	sp|Q7TQH0|ATX2L_MOUSE;gnl|BL_ORD_ID|303663;sp|Q8WWM7|ATX2L_HUMAN;gnl|BL_ORD_ID|293702	sp|Q7TQH0|ATX2L_MOUSE Ataxin-2-like protein OS=Mus musculus GN=Atxn2l PE=1 SV=1;sp|Q7TQH0|ATX2L_MOUSE Ataxin-2-like protein OS=Mus musculus GN=Atxn2l PE=1 SV=1;sp|Q8WWM7|ATX2L_HUMAN Ataxin-2-like protein OS=Homo sapiens GN=ATXN2L PE=1 SV=2;sp|Q8WWM7|ATX2L_HUMAN Ataxin-2-like protein OS=Homo sapiens GN=ATXN2L PE=1 SV=2
AURKB	2.03619	1.94146	2.08817	2.28362	2.17493	2.19607	1.92127	2.02263	2.03826	1.91981	2.0599	2.08016	1.57588	1.52022	1.57264	1.49415	1.77349	1.62118	PREDICTED: aurora kinase B isoform X2 [Pelodiscus sinensis];PREDICTED: aurora kinase B isoform X3 [Pelodiscus sinensis];PREDICTED: aurora kinase B isoform X1 [Pelodiscus sinensis];PREDICTED: aurora kinase B isoform X4 [Pelodiscus sinensis]	GO:0004672;GO:0031577;GO:0005524;GO:0004674;GO:0032467;GO:0032133;GO:0051233;GO:0007067;GO:0043988;GO:0000780;GO:0000166;GO:0004712;GO:0032465;GO:0006468;GO:0007052;GO:0031616;GO:0035174;GO:0005876;GO:0007049	protein kinase activity;spindle checkpoint;ATP binding;protein serine/threonine kinase activity;positive regulation of cytokinesis;chromosome passenger complex;spindle midzone;mitotic cell cycle;histone H3-S28 phosphorylation;condensed nuclear chromosome, centromeric region;nucleotide binding;protein serine/threonine/tyrosine kinase activity;regulation of cytokinesis;protein phosphorylation;mitot…	K11479	AURKB	http://www.genome.jp/dbget-bin/www_bget?ko:K11479	-	-	KOG0580(D)(Serine/threonine protein kinase)	sp|Q6GPL3|AUKBB_XENLA;gnl|BL_ORD_ID|301847;gnl|BL_ORD_ID|294587	sp|Q6GPL3|AUKBB_XENLA Aurora kinase B-B OS=Xenopus laevis GN=aurkb-b PE=2 SV=1;sp|Q6GPL3|AUKBB_XENLA Aurora kinase B-B OS=Xenopus laevis GN=aurkb-b PE=2 SV=1;sp|Q9N0X0|AURKB_PIG Aurora kinase B OS=Sus scrofa GN=AURKB PE=2 SV=2
BLOC1S1	1.58467	1.54283	1.66736	1.99052	1.89785	1.90752	1.75458	1.8604	1.77195	1.75074	1.89713	1.78017	2.02032	1.97827	2.02226	1.85503	1.87846	1.93217	PREDICTED: biogenesis of lysosome-related organelles complex 1 subunit 1 [Pelodiscus sinensis]	GO:0005769;GO:0008089;GO:0005739;GO:0005758;GO:0005829;GO:0031083;GO:0005759;GO:0016197;GO:0048490	early endosome;anterograde axonal transport;mitochondrion;mitochondrial intermembrane space;cytosol;BLOC-1 complex;mitochondrial matrix;endosomal transport;anterograde synaptic vesicle transport	K20185	BLOC1S1	http://www.genome.jp/dbget-bin/www_bget?ko:K20185	-	-	-	sp|O55102|BL1S1_MOUSE;sp|Q2NKW0|BL1S1_BOVIN;gnl|BL_ORD_ID|304536	sp|O55102|BL1S1_MOUSE Biogenesis of lysosome-related organelles complex 1 subunit 1 OS=Mus musculus GN=Bloc1s1 PE=1 SV=2;sp|Q2NKW0|BL1S1_BOVIN Biogenesis of lysosome-related organelles complex 1 subunit 1 OS=Bos taurus GN=BLOC1S1 PE=2 SV=1;sp|Q2NKW0|BL1S1_BOVIN Biogenesis of lysosome-related organelles complex 1 subunit 1 OS=Bos taurus GN=BLOC1S1 PE=2 SV=1
BPHL	1.67715	1.56158	1.54864	1.44623	1.59195	1.55895	1.89321	1.80787	1.86882	1.80699	1.74827	1.65677	1.83001	2.00475	2.03511	1.62128	1.68142	1.90244	PREDICTED: valacyclovir hydrolase isoform X3 [Pelodiscus sinensis];PREDICTED: valacyclovir hydrolase isoform X1 [Pelodiscus sinensis]	GO:0070062;GO:0005739	extracellular exosome;mitochondrion	K18399	BPHL	http://www.genome.jp/dbget-bin/www_bget?ko:K18399	-	-	-	sp|Q86WA6|BPHL_HUMAN;gnl|BL_ORD_ID|305045	sp|Q86WA6|BPHL_HUMAN Valacyclovir hydrolase OS=Homo sapiens GN=BPHL PE=1 SV=1;sp|Q86WA6|BPHL_HUMAN Valacyclovir hydrolase OS=Homo sapiens GN=BPHL PE=1 SV=1
BRI3	1.98994	2.1564	2.03719	2.01085	2.03218	2.05469	2.18336	2.13691	2.15794	2.04891	2.10322	2.01022	2.26401	2.28556	2.46159	2.21524	2.42575	2.29502	PREDICTED: brain protein I3 [Pelodiscus sinensis]	-	-	-	-	-	-	-	-	sp|Q5PPK1|BRI3_RAT;gnl|BL_ORD_ID|303612	sp|Q5PPK1|BRI3_RAT Brain protein I3 OS=Rattus norvegicus GN=Bri3 PE=2 SV=1;sp|Q5PPK1|BRI3_RAT Brain protein I3 OS=Rattus norvegicus GN=Bri3 PE=2 SV=1
BSG	2.69252	2.6685	2.73967	2.70402	2.69503	2.76777	2.84025	2.8684	2.8626	2.84505	2.8938	2.79946	2.91653	2.99311	3.03934	2.95563	3.03834	3.03437	PREDICTED: basigin, partial [Pelodiscus sinensis]	-	-	K06535	BSG,CD147	http://www.genome.jp/dbget-bin/www_bget?ko:K06535	-	-	-	sp|P17790|BASI_CHICK;gnl|BL_ORD_ID|303815	sp|P17790|BASI_CHICK Basigin OS=Gallus gallus GN=BSG PE=1 SV=2;sp|P17790|BASI_CHICK Basigin OS=Gallus gallus GN=BSG PE=1 SV=2
CAPN8	1.63799	1.80353	2.04579	1.44576	1.7026	1.59162	1.65225	1.76065	1.615	1.75876	1.66755	1.59406	2.04434	1.82975	1.95279	2.06461	1.80523	1.85618	PREDICTED: calpain-8 [Pelodiscus sinensis]	GO:0008233;GO:0007586;GO:0005622;GO:0004198;GO:0005509;GO:0008234;GO:0016787;GO:0006508	peptidase activity;digestion;intracellular;calcium-dependent cysteine-type endopeptidase activity;calcium ion binding;cysteine-type peptidase activity;hydrolase activity;proteolysis	K08577	CAPN8	http://www.genome.jp/dbget-bin/www_bget?ko:K08577	-	-	KOG0045(OT)(Cytosolic Ca2+-dependent cysteine protease (calpain), large subunit (EF-Hand protein superfamily))	gnl|BL_ORD_ID|309873;sp|A6NHC0|CAN8_HUMAN	sp|A6NHC0|CAN8_HUMAN Calpain-8 OS=Homo sapiens GN=CAPN8 PE=2 SV=3;sp|A6NHC0|CAN8_HUMAN Calpain-8 OS=Homo sapiens GN=CAPN8 PE=2 SV=3
CBX1	1.94611	1.90439	1.97271	2.29385	2.15366	2.13615	2.03262	2.09653	2.1433	2.0782	2.14408	2.21277	1.70389	1.63083	1.59295	1.71248	1.78226	1.77269	PREDICTED: chromobox protein homolog 1 [Fulmarus glacialis]	GO:0042802;GO:0005721;GO:0001940;GO:0045892;GO:0000775;GO:1990226;GO:0000781;GO:0010369;GO:0000785;GO:0042803;GO:0000784;GO:0005515;GO:0001939;GO:0005819;GO:0005634;GO:0019899	identical protein binding;pericentric heterochromatin;male pronucleus;negative regulation of transcription, DNA-templated;chromosome, centromeric region;histone methyltransferase binding;chromosome, telomeric region;chromocenter;chromatin;protein homodimerization activity;nuclear chromosome, telomeric region;protein binding;female pronucleus;spindle;nucleus;enzyme binding	K11585	CBX1,HP1B,SWI6	http://www.genome.jp/dbget-bin/www_bget?ko:K11585	-	-	KOG1911(B)(Heterochromatin-associated protein HP1 and related CHROMO domain proteins)	gnl|BL_ORD_ID|310645;sp|P83916|CBX1_HUMAN	sp|P83916|CBX1_HUMAN Chromobox protein homolog 1 OS=Homo sapiens GN=CBX1 PE=1 SV=1;sp|P83916|CBX1_HUMAN Chromobox protein homolog 1 OS=Homo sapiens GN=CBX1 PE=1 SV=1
CCDC102A	1.31973	1.30535	1.46315	1.64207	1.73416	1.73183	1.48968	1.40654	1.60563	1.43981	1.47712	1.41581	1.41929	1.3587	1.455	1.47041	1.5012	1.4442	PREDICTED: LOW QUALITY PROTEIN: coiled-coil domain-containing protein 102A [Pelodiscus sinensis]	-	-	K16759	CCDC102A	http://www.genome.jp/dbget-bin/www_bget?ko:K16759	-	-	-	gnl|BL_ORD_ID|311382;sp|Q96A19|C102A_HUMAN;sp|Q6NZW0|C102A_DANRE;sp|Q3TMW1|C102A_MOUSE	sp|Q3TMW1|C102A_MOUSE Coiled-coil domain-containing protein 102A OS=Mus musculus GN=Ccdc102a PE=1 SV=2;sp|Q96A19|C102A_HUMAN Coiled-coil domain-containing protein 102A OS=Homo sapiens GN=CCDC102A PE=1 SV=2;sp|Q6NZW0|C102A_DANRE Coiled-coil domain-containing protein 102A OS=Danio rerio GN=ccdc102a PE=2 SV=1;sp|Q3TMW1|C102A_MOUSE Coiled-coil domain-containing protein 102A OS=Mus musculus GN=Ccdc102…
CCDC189	1.69381	1.63043	1.76335	1.94037	1.70783	2.03818	1.72632	1.51746	1.68377	1.54974	1.60195	1.66219	1.69434	1.49429	1.52905	1.65234	1.66848	1.6289	PREDICTED: coiled-coil domain-containing protein C16orf93 homolog isoform X1 [Pelodiscus sinensis];PREDICTED: coiled-coil domain-containing protein C16orf93 homolog isoform X5 [Pelodiscus sinensis];PREDICTED: coiled-coil domain-containing protein C16orf93 homolog isoform X2 [Pelodiscus sinensis];PREDICTED: coiled-coil domain-containing protein C16orf93 homolog isoform X3 [Pelodiscus sinensis];PRE…	-	-	-	-	-	-	-	-	gnl|BL_ORD_ID|320338;sp|Q6NZQ0|CC189_MOUSE	sp|Q6NZQ0|CC189_MOUSE Coiled-coil domain-containing protein 189 OS=Mus musculus GN=Ccdc189 PE=1 SV=2;sp|Q6NZQ0|CC189_MOUSE Coiled-coil domain-containing protein 189 OS=Mus musculus GN=Ccdc189 PE=1 SV=2
CCDC97	1.71096	1.67237	1.81604	2.12992	1.98005	2.03918	1.6506	1.75328	1.7926	1.61405	1.7614	1.71983	1.83607	1.80468	1.7502	1.72272	1.83033	1.83721	PREDICTED: coiled-coil domain-containing protein 97, partial [Pelodiscus sinensis]	-	-	-	-	-	-	-	-	gnl|BL_ORD_ID|324730	sp|Q96F63|CCD97_HUMAN Coiled-coil domain-containing protein 97 OS=Homo sapiens GN=CCDC97 PE=1 SV=1
CCPG1	1.57124	1.60531	1.52153	1.62655	1.56289	1.70415	1.70243	1.69496	1.73711	1.77561	1.64326	1.63869	1.56526	1.66427	1.71349	1.64048	1.59726	1.63599	PREDICTED: cell cycle progression protein 1 isoform X1 [Pelodiscus sinensis];PREDICTED: cell cycle progression protein 1 isoform X2 [Pelodiscus sinensis];PREDICTED: cell cycle progression protein 1 isoform X3 [Chrysemys picta bellii];PREDICTED: cell cycle progression protein 1 isoform X3 [Pelodiscus sinensis];PREDICTED: cell cycle progression protein 1 isoform X1 [Chrysemys picta bellii]<>XP_0081…	-	-	-	-	-	-	-	-	sp|Q5ZM60|CCPG1_CHICK;gnl|BL_ORD_ID|321113	sp|Q5ZM60|CCPG1_CHICK Cell cycle progression protein 1 OS=Gallus gallus GN=CCPG1 PE=2 SV=1;sp|Q5ZM60|CCPG1_CHICK Cell cycle progression protein 1 OS=Gallus gallus GN=CCPG1 PE=2 SV=1
CDC42SE2	1.45954	1.7165	1.4682	1.25527	1.26387	1.36154	1.60831	1.61215	1.66342	1.76087	1.70834	1.62107	1.92158	1.77786	1.89944	1.91461	1.80645	1.81158	PREDICTED: CDC42 small effector protein 2 [Anolis carolinensis]<>XP_003782268.1 PREDICTED: CDC42 small effector protein 2 [Otolemur garnettii]<>XP_004420296.1 PREDICTED: CDC42 small effector protein 2 [Ceratotherium simum simum]<>XP_004609891.1 PREDICTED: CDC42 small effector protein 2 [Sorex araneus]<>XP_004686743.1 PREDICTED: CDC42 small effector protein 2 [Condylura cristata]<>XP_005024872.1 P…	GO:0005737;GO:0070062;GO:0008360;GO:0042995;GO:0005886;GO:0005856;GO:0009966;GO:0016020;GO:0006909;GO:0007165;GO:0005198;GO:0005515;GO:0001891	cytoplasm;extracellular exosome;regulation of cell shape;cell projection;plasma membrane;cytoskeleton;regulation of signal transduction;membrane;phagocytosis;signal transduction;structural molecule activity;protein binding;phagocytic cup	-	-	-	-	-	-	gnl|BL_ORD_ID|310727;sp|A6QLJ4|C42S2_BOVIN	sp|A6QLJ4|C42S2_BOVIN CDC42 small effector protein 2 OS=Bos taurus GN=CDC42SE2 PE=3 SV=1;sp|A6QLJ4|C42S2_BOVIN CDC42 small effector protein 2 OS=Bos taurus GN=CDC42SE2 PE=3 SV=1
CDCA3	1.97021	1.97923	2.02094	2.05246	1.76893	1.91619	1.70714	1.75213	1.89187	1.69425	1.73949	1.82158	1.45102	1.35468	1.48259	1.44871	1.7273	1.5325	PREDICTED: cell division cycle-associated protein 3, partial [Pelodiscus sinensis]	-	-	-	-	-	-	-	-	sp|Q68FW2|CDCA3_RAT;gnl|BL_ORD_ID|326580	sp|Q68FW2|CDCA3_RAT Cell division cycle-associated protein 3 OS=Rattus norvegicus GN=Cdca3 PE=1 SV=1;sp|Q68FW2|CDCA3_RAT Cell division cycle-associated protein 3 OS=Rattus norvegicus GN=Cdca3 PE=1 SV=1
CEBPA	1.44311	1.27091	1.38075	1.38507	1.69897	1.41229	1.87256	1.73183	1.82308	1.77764	1.86499	1.7696	1.79886	1.86976	2.02796	1.70501	1.67201	2.05918	PREDICTED: CCAAT/enhancer-binding protein alpha [Pelodiscus sinensis]	-	-	K09055	CEBPA	http://www.genome.jp/dbget-bin/www_bget?ko:K09055	-	-	KOG3119(K)(Basic region leucine zipper transcription factor)	gnl|BL_ORD_ID|320746	sp|P53566|CEBPA_MOUSE CCAAT/enhancer-binding protein alpha OS=Mus musculus GN=Cebpa PE=1 SV=2
CEP131	1.62003	1.70303	1.90725	2.10322	1.94635	2.00126	1.58252	1.66549	1.76208	1.62201	1.62675	1.54407	1.68323	1.65205	1.58906	1.82367	1.86034	1.8238	PREDICTED: centrosomal protein of 131 kDa [Pelodiscus sinensis]	-	-	K16540	AZI1,CEP131	http://www.genome.jp/dbget-bin/www_bget?ko:K16540	-	-	-	gnl|BL_ORD_ID|339819;sp|U3JAG9|CP131_DANRE	sp|U3JAG9|CP131_DANRE Centrosomal protein of 131 kDa OS=Danio rerio GN=cep131 PE=1 SV=1;sp|U3JAG9|CP131_DANRE Centrosomal protein of 131 kDa OS=Danio rerio GN=cep131 PE=1 SV=1
CFAP52	1.63002	1.47276	1.71617	1.71105	1.50529	1.80868	1.3249	1.43329	1.52763	1.30878	1.31027	1.35025	1.50987	1.26529	1.31681	1.499	1.59561	1.30899	PREDICTED: WD repeat-containing protein 16 [Chrysemys picta bellii]	-	-	-	-	-	-	-	KOG0266(R)(WD40 repeat-containing protein)	gnl|BL_ORD_ID|329124;sp|Q8N1V2|CFA52_HUMAN	sp|Q8N1V2|CFA52_HUMAN Cilia- and flagella-associated protein 52 OS=Homo sapiens GN=CFAP52 PE=1 SV=3;sp|Q8N1V2|CFA52_HUMAN Cilia- and flagella-associated protein 52 OS=Homo sapiens GN=CFAP52 PE=1 SV=3
CHP1	2.04747	1.93977	1.8589	1.83872	1.99198	1.98381	2.37405	2.2978	2.28531	2.30997	2.34191	2.31154	2.08629	2.36601	2.31551	2.16779	2.01507	2.23482	AltName: Full=EF-hand calcium-binding domain-containing protein p22<>CAG31199.1 hypothetical protein RCJMB04_3d7 [Gallus gallus];calcineurin B homologous protein 1 [Gallus gallus]<>XP_003206498.2 PREDICTED: calcineurin B homologous protein 1 [Meleagris gallopavo]<>Q5ZM44.3 RecName: Full=Calcineurin B homologous protein 1; AltName: Full=Calcineurin B-like protein;hypothetical protein XELAEV_180027…	GO:0005737;GO:0015031;GO:0032088;GO:0070062;GO:0090314;GO:0060050;GO:0061025;GO:0006611;GO:0005886;GO:0006810;GO:0005509;GO:0048306;GO:0005856;GO:0008017;GO:0070885;GO:0001933;GO:0005215;GO:0031122;GO:0005793;GO:0051453;GO:0031953;GO:0061024;GO:0050821;GO:0001578;GO:0016020;GO:0071468;GO:0010923;GO:0042308;GO:0005925;GO:0006469;GO:0030133;GO:0051222;GO:0005783;GO:0004860;GO:0022406;GO:0015630;GO:…	cytoplasm;protein transport;negative regulation of NF-kappaB transcription factor activity;extracellular exosome;positive regulation of protein targeting to membrane;positive regulation of protein glycosylation;membrane fusion;protein export from nucleus;plasma membrane;transport;calcium ion binding;calcium-dependent protein binding;cytoskeleton;microtubule binding;negative regulation of calcineu…	K17610	CHP,CHP1	http://www.genome.jp/dbget-bin/www_bget?ko:K17610	-	-	KOG0034(T)(Ca2+/calmodulin-dependent protein phosphatase (calcineurin subunit B), EF-Hand superfamily protein);KOG0044(T)(Ca2+ sensor (EF-Hand superfamily));KOG0038(R)(Ca2+-binding kinase interacting protein (KIP) (EF-Hand protein superfamily))	gnl|BL_ORD_ID|334276;sp|Q5ZM44|CHP1_CHICK	sp|Q3SYS6|CHP1_BOVIN Calcineurin B homologous protein 1 OS=Bos taurus GN=CHP1 PE=2 SV=1;sp|Q5ZM44|CHP1_CHICK Calcineurin B homologous protein 1 OS=Gallus gallus GN=CHP1 PE=1 SV=3
CHURC1	1.89763	1.87075	1.76223	2.46449	2.40834	2.31677	2.23915	2.07133	2.14523	2.11217	2.24601	2.21293	2.29903	2.09812	2.27983	2.24881	2.01157	2.2782	PREDICTED: protein Churchill [Pelodiscus sinensis]	GO:0042074;GO:0040037;GO:0007275;GO:0045893;GO:0090243;GO:0030334;GO:0008270;GO:0042661;GO:0030336	cell migration involved in gastrulation;negative regulation of fibroblast growth factor receptor signaling pathway;multicellular organism development;positive regulation of transcription, DNA-templated;fibroblast growth factor receptor signaling pathway involved in somitogenesis;regulation of cell migration;zinc ion binding;regulation of mesodermal cell fate specification;negative regulation of c…	-	-	-	-	-	-	sp|Q66JD9|CHUR_XENTR;gnl|BL_ORD_ID|328871	sp|Q66JD9|CHUR_XENTR Protein Churchill OS=Xenopus tropicalis GN=churc1 PE=3 SV=1;sp|Q66JD9|CHUR_XENTR Protein Churchill OS=Xenopus tropicalis GN=churc1 PE=3 SV=1
CLK2	1.5924	1.64562	1.7352	1.82439	1.62315	1.85546	1.37181	1.39076	1.5392	1.3298	1.44607	1.44793	1.5197	1.41764	1.53352	1.67742	1.57124	1.70791	PREDICTED: dual specificity protein kinase CLK2 isoform X2 [Pelodiscus sinensis];PREDICTED: dual specificity protein kinase CLK2 isoform X1 [Pelodiscus sinensis]	GO:0004672;GO:0005654;GO:0005524;GO:0032526;GO:0004674;GO:0016310;GO:0016301;GO:0010033;GO:0043484;GO:0046777;GO:0045721;GO:0000166;GO:0018108;GO:0004713;GO:0006468;GO:0005634;GO:0010212	protein kinase activity;nucleoplasm;ATP binding;response to retinoic acid;protein serine/threonine kinase activity;phosphorylation;kinase activity;response to organic substance;regulation of RNA splicing;protein autophosphorylation;negative regulation of gluconeogenesis;nucleotide binding;peptidyl-tyrosine phosphorylation;protein tyrosine kinase activity;protein phosphorylation;nucleus;response t…	K08823	CLK	http://www.genome.jp/dbget-bin/www_bget?ko:K08823	-	-	KOG0671(T)(LAMMER dual specificity kinases)	gnl|BL_ORD_ID|330145;gnl|BL_ORD_ID|325591;sp|P49760|CLK2_HUMAN;sp|O35491|CLK2_MOUSE	sp|O35491|CLK2_MOUSE Dual specificity protein kinase CLK2 OS=Mus musculus GN=Clk2 PE=1 SV=2;sp|P49760|CLK2_HUMAN Dual specificity protein kinase CLK2 OS=Homo sapiens GN=CLK2 PE=1 SV=1;sp|P49760|CLK2_HUMAN Dual specificity protein kinase CLK2 OS=Homo sapiens GN=CLK2 PE=1 SV=1;sp|O35491|CLK2_MOUSE Dual specificity protein kinase CLK2 OS=Mus musculus GN=Clk2 PE=1 SV=2
CLPTM1	1.8651	1.83308	1.82549	1.88463	1.80044	1.93616	1.82672	1.76982	1.90682	1.78497	1.73488	1.72957	2.00578	2.18693	2.07177	1.91787	2.0159	1.94166	PREDICTED: cleft lip and palate transmembrane protein 1 [Chrysemys picta bellii];PREDICTED: cleft lip and palate transmembrane protein 1 [Pelodiscus sinensis]	GO:0009897;GO:0033081;GO:0016021;GO:0016020	external side of plasma membrane;regulation of T cell differentiation in thymus;integral component of membrane;membrane	-	-	-	-	-	KOG2489(R)(Transmembrane protein)	sp|O96005|CLPT1_HUMAN;gnl|BL_ORD_ID|333522;sp|Q2NL17|CLPT1_BOVIN	sp|O96005|CLPT1_HUMAN Cleft lip and palate transmembrane protein 1 OS=Homo sapiens GN=CLPTM1 PE=1 SV=1;sp|O96005|CLPT1_HUMAN Cleft lip and palate transmembrane protein 1 OS=Homo sapiens GN=CLPTM1 PE=1 SV=1;sp|Q2NL17|CLPT1_BOVIN Cleft lip and palate transmembrane protein 1 homolog OS=Bos taurus GN=CLPTM1 PE=2 SV=1
COPS6	2.13745	2.01309	2.13893	2.55241	2.44626	2.48263	2.28764	2.29863	2.39888	2.33118	2.34019	2.31063	2.3007	2.38364	2.44926	2.41019	2.25215	2.37075	PREDICTED: COP9 signalosome complex subunit 6 [Pelodiscus sinensis]	GO:0005737;GO:0070062;GO:0005654;GO:0008180;GO:0010388;GO:0005634	cytoplasm;extracellular exosome;nucleoplasm;COP9 signalosome;protein deneddylation;nucleus	K12179	COPS6,CSN6	http://www.genome.jp/dbget-bin/www_bget?ko:K12179	-	-	KOG1556(O)(26S proteasome regulatory complex, subunit RPN8/PSMD7)	sp|Q5REY0|CSN6_PONAB;gnl|BL_ORD_ID|340060	sp|Q5REY0|CSN6_PONAB COP9 signalosome complex subunit 6 OS=Pongo abelii GN=COPS6 PE=2 SV=1;sp|Q5REY0|CSN6_PONAB COP9 signalosome complex subunit 6 OS=Pongo abelii GN=COPS6 PE=2 SV=1
COPS7A	1.9424	1.97791	1.93414	1.94822	1.92247	1.9525	2.03121	1.99414	2.06149	2.03902	1.98865	1.96839	2.13351	2.14095	2.06629	2.11096	2.10326	2.10016	PREDICTED: COP9 signalosome complex subunit 7a [Pelodiscus sinensis]	-	-	K12180	COPS7,CSN7	http://www.genome.jp/dbget-bin/www_bget?ko:K12180	-	-	KOG3250(OT)(COP9 signalosome, subunit CSN7)	gnl|BL_ORD_ID|347999;sp|Q9UBW8|CSN7A_HUMAN	sp|Q5R762|CSN7A_PONAB COP9 signalosome complex subunit 7a OS=Pongo abelii GN=COPS7A PE=2 SV=1;sp|Q9UBW8|CSN7A_HUMAN COP9 signalosome complex subunit 7a OS=Homo sapiens GN=COPS7A PE=1 SV=1
COTL1	2.17653	2.23548	2.2652	2.1936	2.11224	2.01182	2.1336	2.21141	2.21484	2.2086	2.14154	2.17035	2.21163	2.30636	2.21021	2.14894	2.16566	2.21527	PREDICTED: coactosin-like protein [Pelodiscus sinensis]	GO:0030041;GO:0070062;GO:0001755;GO:0005622;GO:0003779;GO:0050832;GO:0019899	actin filament polymerization;extracellular exosome;neural crest cell migration;intracellular;actin binding;defense response to fungus;enzyme binding	-	-	-	-	-	-	sp|Q2HJ57|COTL1_BOVIN;gnl|BL_ORD_ID|316298	sp|Q2HJ57|COTL1_BOVIN Coactosin-like protein OS=Bos taurus GN=COTL1 PE=2 SV=3;sp|B0BNA5|COTL1_RAT Coactosin-like protein OS=Rattus norvegicus GN=Cotl1 PE=1 SV=1
CPPED1	1.96194	2.09167	1.88457	1.54839	1.85546	1.71958	2.20325	2.19802	2.18758	2.16471	2.09093	2.09538	1.887	2.20393	2.06243	1.66661	1.90472	1.97809	PREDICTED: LOW QUALITY PROTEIN: calcineurin-like phosphoesterase domain-containing protein 1 [Chelonia mydas];PREDICTED: serine/threonine-protein phosphatase CPPED1 [Pelodiscus sinensis]	-	-	-	-	-	-	-	-	sp|Q58DC0|CPPED_BOVIN;gnl|BL_ORD_ID|336842	sp|Q58DC0|CPPED_BOVIN Serine/threonine-protein phosphatase CPPED1 OS=Bos taurus GN=CPPED1 PE=2 SV=1;sp|Q28FE0|CPPED_XENTR Serine/threonine-protein phosphatase CPPED1 OS=Xenopus tropicalis GN=cpped1 PE=2 SV=1
CPVL	2.06247	2.01098	2.06341	1.95002	2.26538	2.06528	2.18187	2.15482	2.04778	2.08927	2.03121	1.98869	2.28836	2.38434	2.49922	2.0893	2.42221	2.34292	PREDICTED: probable serine carboxypeptidase CPVL [Pelodiscus sinensis]	GO:0070062;GO:0004185;GO:0051603;GO:0006508	extracellular exosome;serine-type carboxypeptidase activity;proteolysis involved in cellular protein catabolic process;proteolysis	K09645	CPVL	http://www.genome.jp/dbget-bin/www_bget?ko:K09645	-	-	KOG1282(OE)(Serine carboxypeptidases (lysosomal cathepsin A))	sp|Q9H3G5|CPVL_HUMAN;gnl|BL_ORD_ID|336862	sp|Q9H3G5|CPVL_HUMAN Probable serine carboxypeptidase CPVL OS=Homo sapiens GN=CPVL PE=1 SV=2;sp|Q9H3G5|CPVL_HUMAN Probable serine carboxypeptidase CPVL OS=Homo sapiens GN=CPVL PE=1 SV=2
CRYZ	1.79134	1.94429	1.68467	1.57921	1.68547	1.70723	2.00979	1.93581	1.9345	2.01397	1.84292	1.92075	1.78675	2.03185	1.99131	1.74617	1.83664	1.9489	PREDICTED: quinone oxidoreductase [Pelodiscus sinensis]<>XP_006130465.1 PREDICTED: quinone oxidoreductase [Pelodiscus sinensis]<>XP_014432642.1 PREDICTED: quinone oxidoreductase [Pelodiscus sinensis]	GO:0005737;GO:0070402;GO:0070062;GO:0003730;GO:0005829;GO:0042178;GO:0003960;GO:0055114;GO:0016491;GO:0051289;GO:0008270	cytoplasm;NADPH binding;extracellular exosome;mRNA 3'-UTR binding;cytosol;xenobiotic catabolic process;NADPH:quinone reductase activity;oxidation-reduction process;oxidoreductase activity;protein homotetramerization;zinc ion binding	K00344	qor,CRYZ	http://www.genome.jp/dbget-bin/www_bget?ko:K00344	-	-	KOG1198(CR)(Zinc-binding oxidoreductase);KOG1197(CR)(Predicted quinone oxidoreductase)	gnl|BL_ORD_ID|151502;sp|Q08257|QOR_HUMAN	sp|Q08257|QOR_HUMAN Quinone oxidoreductase OS=Homo sapiens GN=CRYZ PE=1 SV=1;sp|Q08257|QOR_HUMAN Quinone oxidoreductase OS=Homo sapiens GN=CRYZ PE=1 SV=1
CSTB	1.82814	1.40807	1.37931	1.68151	1.5966	1.49955	1.96881	1.85187	1.73783	2.02502	1.85618	1.88474	1.49206	2.18113	1.97603	1.77262	1.71809	1.708	PREDICTED: cystatin-B [Pelodiscus sinensis]	GO:0005615;GO:0010951;GO:0008344;GO:0005737;GO:0004869;GO:0070062;GO:0010466;GO:0044822;GO:0005622;GO:0030414;GO:0045861;GO:0005730;GO:0004866;GO:0002020	extracellular space;negative regulation of endopeptidase activity;adult locomotory behavior;cytoplasm;cysteine-type endopeptidase inhibitor activity;extracellular exosome;negative regulation of peptidase activity;RNA binding;intracellular;peptidase inhibitor activity;negative regulation of proteolysis;nucleolus;endopeptidase inhibitor activity;protease binding	K13907	CSTA_B	http://www.genome.jp/dbget-bin/www_bget?ko:K13907	-	-	-	gnl|BL_ORD_ID|355115	sp|Q8I030|CYTB_PANTR Cystatin-B OS=Pan troglodytes GN=CSTB PE=3 SV=1
CYS1	1.33365	1.64355	1.53237	1.21059	1.27531	1.49234	1.1827	1.51255	1.45163	1.50623	1.18808	1.36884	1.70312	1.8367	1.8907	1.69975	1.72156	1.89393	PREDICTED: cystin-1 [Pelodiscus sinensis]	-	-	-	-	-	-	-	-	-	-
CYSTM1	2.11274	2.03475	2.22381	2.39508	2.51412	2.51561	2.26475	2.36745	2.43291	2.35949	2.39317	2.17924	2.71413	2.69212	2.71099	2.68546	2.72239	2.6563	hypothetical protein L345_05523, partial [Ophiophagus hannah]	GO:0016021	integral component of membrane	-	-	-	-	-	-	-	-
DAZAP2	2.00363	2.11471	2.06804	1.91339	1.96209	1.95885	2.06618	2.06822	2.17211	2.18304	2.05319	2.11711	2.11348	2.38446	2.32903	2.29354	2.1738	2.30382	PREDICTED: LOW QUALITY PROTEIN: DAZ-associated protein 2 [Chelonia mydas]	GO:0050699	WW domain binding	-	-	-	-	-	-	gnl|BL_ORD_ID|348592;sp|Q5R526|DAZP2_PONAB;sp|Q4R5H7|DAZP2_MACFA	sp|Q5R526|DAZP2_PONAB DAZ-associated protein 2 OS=Pongo abelii GN=DAZAP2 PE=2 SV=1;sp|Q5R526|DAZP2_PONAB DAZ-associated protein 2 OS=Pongo abelii GN=DAZAP2 PE=2 SV=1;sp|Q4R5H7|DAZP2_MACFA DAZ-associated protein 2 OS=Macaca fascicularis GN=DAZAP2 PE=2 SV=1
DBNL	1.53453	1.45909	1.58377	1.84794	1.88332	1.80051	1.77583	1.72411	1.84061	1.88581	1.80963	1.8638	1.72247	1.72941	1.70689	1.75496	1.7237	1.82672	PREDICTED: drebrin-like protein [Pelodiscus sinensis]	-	-	K20520	DBNL,ABP1	http://www.genome.jp/dbget-bin/www_bget?ko:K20520	-	-	KOG3655(Z)(Drebrins and related actin binding proteins)	sp|Q9JHL4|DBNL_RAT;sp|Q62418|DBNL_MOUSE;gnl|BL_ORD_ID|355219	sp|Q9JHL4|DBNL_RAT Drebrin-like protein OS=Rattus norvegicus GN=Dbnl PE=1 SV=1;sp|Q62418|DBNL_MOUSE Drebrin-like protein OS=Mus musculus GN=Dbnl PE=1 SV=2;sp|Q9JHL4|DBNL_RAT Drebrin-like protein OS=Rattus norvegicus GN=Dbnl PE=1 SV=1
DCAF15	1.67025	1.48159	1.48883	2.05683	2.04001	1.91971	1.75899	1.65973	1.67633	1.68187	1.86864	1.71079	1.57576	1.47305	1.54045	1.72107	1.63819	1.67843	PREDICTED: DDB1- and CUL4-associated factor 15 [Pelodiscus sinensis]	-	-	K11791	DCAF15	http://www.genome.jp/dbget-bin/www_bget?ko:K11791	-	-	-	gnl|BL_ORD_ID|354050;sp|Q3SZD5|DCA15_BOVIN	sp|Q3SZD5|DCA15_BOVIN DDB1- and CUL4-associated factor 15 OS=Bos taurus GN=DCAF15 PE=2 SV=1;sp|Q3SZD5|DCA15_BOVIN DDB1- and CUL4-associated factor 15 OS=Bos taurus GN=DCAF15 PE=2 SV=1
DDX39A	2.51896	2.47537	2.58096	2.7574	2.57223	2.7121	2.28576	2.35557	2.42831	2.30133	2.32207	2.3852	2.29791	2.20423	2.23707	2.2777	2.26654	2.31237	PREDICTED: ATP-dependent RNA helicase DDX39A [Pelodiscus sinensis]	GO:0005737;GO:0005524;GO:0044822;GO:0004386;GO:0016020;GO:0003676;GO:0016787;GO:0000398;GO:0006406;GO:0005634	cytoplasm;ATP binding;RNA binding;helicase activity;membrane;nucleic acid binding;hydrolase activity;mRNA splicing, via spliceosome;mRNA export from nucleus;nucleus	K13182	DDX39	http://www.genome.jp/dbget-bin/www_bget?ko:K13182	-	-	KOG0327(J)(Translation initiation factor 4F, helicase subunit (eIF-4A) and related helicases)	sp|Q8VDW0|DX39A_MOUSE;sp|Q5U216|DX39A_RAT;gnl|BL_ORD_ID|375406	sp|Q8VDW0|DX39A_MOUSE ATP-dependent RNA helicase DDX39A OS=Mus musculus GN=Ddx39a PE=1 SV=1;sp|Q5U216|DX39A_RAT ATP-dependent RNA helicase DDX39A OS=Rattus norvegicus GN=Ddx39a PE=2 SV=1;sp|Q8VDW0|DX39A_MOUSE ATP-dependent RNA helicase DDX39A OS=Mus musculus GN=Ddx39a PE=1 SV=1
DEDD2	2.76926	2.84979	2.87576	3.10794	2.98367	3.01231	2.52646	2.49349	2.7252	2.44365	2.61131	2.53941	2.84302	2.70993	2.82143	2.73629	2.62581	2.87637	PREDICTED: DNA-binding death effector domain-containing protein 2 [Pelodiscus sinensis];PREDICTED: DNA-binding death effector domain-containing protein 2, partial [Chelonia mydas]	GO:0042981	regulation of apoptotic process	-	-	-	-	-	-	sp|Q8QZV0|DEDD2_MOUSE;sp|O75618|DEDD_HUMAN;sp|Q8WXF8|DEDD2_HUMAN;gnl|BL_ORD_ID|355443	sp|Q8QZV0|DEDD2_MOUSE DNA-binding death effector domain-containing protein 2 OS=Mus musculus GN=Dedd2 PE=2 SV=1;sp|O75618|DEDD_HUMAN Death effector domain-containing protein OS=Homo sapiens GN=DEDD PE=1 SV=1;sp|Q8WXF8|DEDD2_HUMAN DNA-binding death effector domain-containing protein 2 OS=Homo sapiens GN=DEDD2 PE=1 SV=1;sp|Q8WXF8|DEDD2_HUMAN DNA-binding death effector domain-containing protein 2 OS…
DENR	2.1564	2.29645	2.05007	1.81305	1.49996	1.85878	1.92536	2.0271	1.94359	1.7068	1.69906	1.71933	2.01787	1.86652	1.87396	1.71458	1.80257	1.71003	Density-regulated protein [Acanthisitta chloris];Density-regulated protein [Chlamydotis macqueenii]	-	-	-	-	-	-	-	KOG3239(R)(Density-regulated protein related to translation initiation factor 1 (eIF-1/SUI1))	gnl|BL_ORD_ID|357453;sp|O43583|DENR_HUMAN	sp|O43583|DENR_HUMAN Density-regulated protein OS=Homo sapiens GN=DENR PE=1 SV=2;sp|O43583|DENR_HUMAN Density-regulated protein OS=Homo sapiens GN=DENR PE=1 SV=2
DHRS7	2.25324	2.40652	2.32027	2.26126	2.26776	2.26397	2.4089	2.38268	2.4008	2.38369	2.43492	2.33664	2.33638	2.41244	2.4042	2.41736	2.31775	2.35085	PREDICTED: LOW QUALITY PROTEIN: dehydrogenase/reductase SDR family member 7 [Pelodiscus sinensis]	-	-	K11165	DHRS7	http://www.genome.jp/dbget-bin/www_bget?ko:K11165	-	-	KOG1205(Q)(Predicted dehydrogenase)	gnl|BL_ORD_ID|351296;sp|Q9Y394|DHRS7_HUMAN	sp|Q9Y394|DHRS7_HUMAN Dehydrogenase/reductase SDR family member 7 OS=Homo sapiens GN=DHRS7 PE=1 SV=1;sp|Q9Y394|DHRS7_HUMAN Dehydrogenase/reductase SDR family member 7 OS=Homo sapiens GN=DHRS7 PE=1 SV=1
DNLZ	1.74554	1.87547	1.91153	2.06547	1.9163	2.01803	1.61521	1.65011	1.70586	1.6603	1.6869	1.69566	1.81875	1.81968	1.74202	1.80058	1.84516	1.90428	PREDICTED: DNL-type zinc finger protein [Pelodiscus sinensis]	-	-	K17808	ZIM17,DNLZ,Tim15	http://www.genome.jp/dbget-bin/www_bget?ko:K17808	-	-	KOG3277(S)(Uncharacterized conserved protein)	gnl|BL_ORD_ID|364038;sp|Q0IH40|DNLZ_XENLA	sp|Q0IH40|DNLZ_XENLA DNL-type zinc finger protein OS=Xenopus laevis GN=dnlz PE=2 SV=1;sp|Q0IH40|DNLZ_XENLA DNL-type zinc finger protein OS=Xenopus laevis GN=dnlz PE=2 SV=1
DNTTIP1	1.97285	1.81043	1.94245	2.18741	2.06573	2.10274	1.80733	1.8284	1.91997	1.7859	1.82223	1.84448	1.8815	1.75488	1.77692	1.9689	1.93922	1.88252	PREDICTED: deoxynucleotidyltransferase terminal-interacting protein 1 [Pelodiscus sinensis]	-	-	K08707	DNTTIP1	http://www.genome.jp/dbget-bin/www_bget?ko:K08707	-	-	-	gnl|BL_ORD_ID|506866;sp|Q91Y53|TDIF1_RAT	sp|A6H7A8|TDIF1_BOVIN Deoxynucleotidyltransferase terminal-interacting protein 1 OS=Bos taurus GN=DNTTIP1 PE=2 SV=1;sp|Q91Y53|TDIF1_RAT Deoxynucleotidyltransferase terminal-interacting protein 1 OS=Rattus norvegicus GN=Dnttip1 PE=2 SV=1
DXO	1.25816	1.21059	1.26788	1.62242	1.67934	1.67587	1.62304	1.57194	1.69793	1.54295	1.64058	1.63215	1.75664	1.7214	1.84683	1.76827	1.6826	1.75876	PREDICTED: decapping and exoribonuclease protein [Pelodiscus sinensis]	GO:0005737;GO:0005886;GO:0005634	cytoplasm;plasma membrane;nucleus	K14845	RAI1,DOM3Z	http://www.genome.jp/dbget-bin/www_bget?ko:K14845	-	-	KOG1982(L)(Nuclear 5'-3' exoribonuclease-interacting protein, Rai1p)	sp|Q5E9Y5|DXO_BOVIN;gnl|BL_ORD_ID|375408	sp|Q5E9Y5|DXO_BOVIN Decapping and exoribonuclease protein OS=Bos taurus GN=DXO PE=2 SV=1;sp|Q5E9Y5|DXO_BOVIN Decapping and exoribonuclease protein OS=Bos taurus GN=DXO PE=2 SV=1
ELF3	0.796574	1.14333	1.47202	1.29181	1.21669	1.34044	1.25888	1.25792	1.42521	1.52815	1.4813	1.16316	2.23343	1.82795	1.77159	2.1625	1.9174	1.85394	PREDICTED: ETS-related transcription factor Elf-3 [Pelodiscus sinensis]	-	-	K09429	K09429,ELF3	http://www.genome.jp/dbget-bin/www_bget?ko:K09429	-	-	KOG3806(K)(Predicted transcription factor)	gnl|BL_ORD_ID|376507	sp|P78545|ELF3_HUMAN ETS-related transcription factor Elf-3 OS=Homo sapiens GN=ELF3 PE=1 SV=1
EMC2	1.73496	1.80024	1.62428	1.65725	1.64689	1.75089	2.0616	2.05185	1.96858	2.06206	1.899	1.96393	1.69758	1.92361	1.8302	1.69452	1.72469	1.76537	PREDICTED: ER membrane protein complex subunit 2 [Pelodiscus sinensis]	-	-	-	-	-	-	-	KOG3060(S)(Uncharacterized conserved protein)	sp|Q15006|EMC2_HUMAN;gnl|BL_ORD_ID|380086	sp|Q15006|EMC2_HUMAN ER membrane protein complex subunit 2 OS=Homo sapiens GN=EMC2 PE=1 SV=1;sp|Q15006|EMC2_HUMAN ER membrane protein complex subunit 2 OS=Homo sapiens GN=EMC2 PE=1 SV=1
EMC7	1.81902	1.89131	1.8441	1.82795	1.76133	1.85896	1.94753	1.95041	1.96942	1.91094	1.84856	1.86876	1.98851	1.98068	1.89348	1.8557	1.89719	1.9136	PREDICTED: ER membrane protein complex subunit 7-like, partial [Carlito syrichta];PREDICTED: ER membrane protein complex subunit 7, partial [Pelodiscus sinensis]	-	-	-	-	-	-	-	KOG3306(S)(Predicted membrane protein)	gnl|BL_ORD_ID|378656;sp|A5PJA8|EMC7_BOVIN	sp|A5PJA8|EMC7_BOVIN ER membrane protein complex subunit 7 OS=Bos taurus GN=EMC7 PE=2 SV=1;sp|A5PJA8|EMC7_BOVIN ER membrane protein complex subunit 7 OS=Bos taurus GN=EMC7 PE=2 SV=1
ETFA	2.2349	2.28103	2.22706	2.20439	2.14004	2.24212	2.25902	2.27681	2.29427	2.26186	2.24423	2.21354	2.23712	2.34758	2.43093	2.15833	2.31806	2.33363	PREDICTED: electron transfer flavoprotein subunit alpha, mitochondrial [Pelodiscus sinensis]	GO:0050660;GO:0009055	flavin adenine dinucleotide binding;electron carrier activity	K03522	fixB,etfA	http://www.genome.jp/dbget-bin/www_bget?ko:K03522	-	-	KOG3954(C)(Electron transfer flavoprotein, alpha subunit)	sp|P13804|ETFA_HUMAN;gnl|BL_ORD_ID|382868	sp|P13804|ETFA_HUMAN Electron transfer flavoprotein subunit alpha, mitochondrial OS=Homo sapiens GN=ETFA PE=1 SV=1;sp|P13804|ETFA_HUMAN Electron transfer flavoprotein subunit alpha, mitochondrial OS=Homo sapiens GN=ETFA PE=1 SV=1
ETV4	1.73094	1.79858	1.75059	2.20529	2.05918	2.08005	1.69214	1.80099	1.89393	1.83803	1.83161	1.84029	1.5978	1.54045	1.306	1.53479	1.53237	1.58749	PREDICTED: ETS translocation variant 4 isoform X2 [Pelodiscus sinensis]<>XP_014430387.1 PREDICTED: ETS translocation variant 4 isoform X2 [Pelodiscus sinensis];PREDICTED: ETS translocation variant 4 isoform X1 [Pelodiscus sinensis]	GO:0005622;GO:0003677;GO:0045893;GO:0005730;GO:0008045;GO:0010628;GO:0048863;GO:0000978;GO:0045944;GO:0043565;GO:0003700;GO:0006355;GO:0005634	intracellular;DNA binding;positive regulation of transcription, DNA-templated;nucleolus;motor neuron axon guidance;positive regulation of gene expression;stem cell differentiation;RNA polymerase II core promoter proximal region sequence-specific DNA binding;positive regulation of transcription from RNA polymerase II promoter;sequence-specific DNA binding;transcription factor activity, sequence-sp…	K15592	ETV4	http://www.genome.jp/dbget-bin/www_bget?ko:K15592	-	-	KOG3806(K)(Predicted transcription factor)	sp|P43268|ETV4_HUMAN;gnl|BL_ORD_ID|384434;gnl|BL_ORD_ID|390901;sp|P28322|ETV4_MOUSE	sp|P43268|ETV4_HUMAN ETS translocation variant 4 OS=Homo sapiens GN=ETV4 PE=1 SV=3;sp|P28322|ETV4_MOUSE ETS translocation variant 4 OS=Mus musculus GN=Etv4 PE=2 SV=2;sp|P43268|ETV4_HUMAN ETS translocation variant 4 OS=Homo sapiens GN=ETV4 PE=1 SV=3;sp|P28322|ETV4_MOUSE ETS translocation variant 4 OS=Mus musculus GN=Etv4 PE=2 SV=2
FAHD2A	1.70868	1.58024	1.61416	1.79071	1.75587	1.83778	1.4368	1.50202	1.46374	1.46553	1.45025	1.52905	1.54108	1.62982	1.60379	1.6067	1.73408	1.6637	PREDICTED: fumarylacetoacetate hydrolase domain-containing protein 2A [Pelodiscus sinensis]	GO:0008152;GO:0003824	metabolic process;catalytic activity	-	-	-	-	-	KOG1535(R)(Predicted fumarylacetoacetate hydralase)	sp|Q2KIB0|FAHD2_BOVIN;gnl|BL_ORD_ID|393096	sp|Q2KIB0|FAHD2_BOVIN Fumarylacetoacetate hydrolase domain-containing protein 2 OS=Bos taurus GN=FAHD2 PE=2 SV=1;sp|Q2KIB0|FAHD2_BOVIN Fumarylacetoacetate hydrolase domain-containing protein 2 OS=Bos taurus GN=FAHD2 PE=2 SV=1
FAM195A	2.23152	2.07806	2.08629	2.16325	2.13846	2.3115	2.28553	2.26074	2.28167	2.14267	2.29511	1.97621	2.37044	2.47204	2.42857	2.16956	2.33634	2.38998	PREDICTED: protein FAM195A [Pelodiscus sinensis]	-	-	-	-	-	-	-	-	sp|Q0II70|MCRI2_BOVIN;gnl|BL_ORD_ID|90138	sp|Q0II70|MCRI2_BOVIN MAPK regulated corepressor interacting protein 2 OS=Bos taurus GN=MCRIP2 PE=2 SV=1;sp|Q0II70|MCRI2_BOVIN MAPK regulated corepressor interacting protein 2 OS=Bos taurus GN=MCRIP2 PE=2 SV=1
FAM213A	2.06744	2.11368	2.13824	2.00548	2.1865	2.08934	2.2392	2.12584	2.24284	2.21685	2.1117	2.15788	2.32771	2.52047	2.45071	2.36042	2.32127	2.42912	PREDICTED: redox-regulatory protein FAM213A isoform X1 [Pelodiscus sinensis]	GO:0005737;GO:0070062;GO:0098869;GO:0016209;GO:0005739;GO:0045670;GO:0016021;GO:0016020;GO:0055114	cytoplasm;extracellular exosome;cellular oxidant detoxification;antioxidant activity;mitochondrion;regulation of osteoclast differentiation;integral component of membrane;membrane;oxidation-reduction process	-	-	-	-	-	KOG4498(S)(Uncharacterized conserved protein)	sp|Q5ZI34|F213A_CHICK;gnl|BL_ORD_ID|390311	sp|Q5ZI34|F213A_CHICK Redox-regulatory protein FAM213A OS=Gallus gallus GN=FAM213A PE=2 SV=2;sp|Q5ZI34|F213A_CHICK Redox-regulatory protein FAM213A OS=Gallus gallus GN=FAM213A PE=2 SV=2
FAM234A	1.1827	1.04297	0.987666	1.75182	1.70018	1.76552	1.6869	1.63979	1.78362	1.85083	1.8968	1.73207	2.33399	2.47903	2.39921	2.60723	2.26472	2.29017	PREDICTED: protein ITFG3 [Pelodiscus sinensis]	-	-	K17258	ITFG3	http://www.genome.jp/dbget-bin/www_bget?ko:K17258	-	-	-	sp|Q2HJE5|F234A_BOVIN;gnl|BL_ORD_ID|386555;sp|Q9H0X4|F234A_HUMAN;sp|Q5M7W6|F234A_RAT	sp|Q2HJE5|F234A_BOVIN Protein FAM234A OS=Bos taurus GN=FAM234A PE=2 SV=1;sp|Q9H0X4|F234A_HUMAN Protein FAM234A OS=Homo sapiens GN=FAM234A PE=1 SV=1;sp|Q9H0X4|F234A_HUMAN Protein FAM234A OS=Homo sapiens GN=FAM234A PE=1 SV=1;sp|Q5M7W6|F234A_RAT Protein FAM234A OS=Rattus norvegicus GN=Fam234a PE=1 SV=1
FAM96A	1.85114	2.01161	1.90536	1.75526	1.69583	1.79064	1.85558	1.90993	1.87309	1.89702	1.85703	1.79162	1.89993	1.86882	1.90466	1.80421	1.89226	1.82308	PREDICTED: MIP18 family protein FAM96A isoform X1 [Chinchilla lanigera];PREDICTED: MIP18 family protein FAM96A [Pelodiscus sinensis]	GO:0005737;GO:0005654;GO:0008150;GO:0003674;GO:0005575;GO:0005634	cytoplasm;nucleoplasm;biological_process;molecular_function;cellular_component;nucleus	-	-	-	-	-	KOG3381(S)(Uncharacterized conserved protein)	sp|Q3T0U7|FA96A_BOVIN;gnl|BL_ORD_ID|391085	sp|Q3T0U7|FA96A_BOVIN MIP18 family protein FAM96A OS=Bos taurus GN=FAM96A PE=2 SV=1;sp|Q3T0U7|FA96A_BOVIN MIP18 family protein FAM96A OS=Bos taurus GN=FAM96A PE=2 SV=1
FAM96B	1.91158	1.95424	1.99326	1.97192	1.87679	2.02333	2.06599	2.11744	2.15281	2.12678	2.11618	2.08973	2.08625	2.27471	2.07232	2.09022	2.10154	2.12437	PREDICTED: mitotic spindle-associated MMXD complex subunit MIP18 [Coturnix japonica]	GO:0005737;GO:0005654;GO:0007059;GO:0097361;GO:0016226;GO:0071817;GO:0005819;GO:0005634	cytoplasm;nucleoplasm;chromosome segregation;CIA complex;iron-sulfur cluster assembly;MMXD complex;spindle;nucleus	-	-	-	-	-	KOG3381(S)(Uncharacterized conserved protein)	sp|Q9D187|MIP18_MOUSE;gnl|BL_ORD_ID|95495	sp|Q9D187|MIP18_MOUSE Mitotic spindle-associated MMXD complex subunit MIP18 OS=Mus musculus GN=Fam96b PE=1 SV=1;sp|Q9D187|MIP18_MOUSE Mitotic spindle-associated MMXD complex subunit MIP18 OS=Mus musculus GN=Fam96b PE=1 SV=1
FBRS	1.65427	1.51561	1.57519	2.12769	2.22881	2.13758	2.00208	1.9983	2.03133	1.98985	2.04716	2.04246	2.07302	2.13213	2.14628	2.0936	1.96445	2.14625	PREDICTED: probable fibrosin-1 [Chrysemys picta bellii];PREDICTED: probable fibrosin-1 [Pelodiscus sinensis]	GO:0008083;GO:0048146;GO:0005615	growth factor activity;positive regulation of fibroblast proliferation;extracellular space	-	-	-	-	-	-	sp|Q8WXX7|AUTS2_HUMAN;gnl|BL_ORD_ID|388090;sp|Q9HAH7|FBRS_HUMAN	sp|Q8WXX7|AUTS2_HUMAN Autism susceptibility gene 2 protein OS=Homo sapiens GN=AUTS2 PE=1 SV=1;sp|Q9HAH7|FBRS_HUMAN Probable fibrosin-1 OS=Homo sapiens GN=FBRS PE=1 SV=3;sp|Q9HAH7|FBRS_HUMAN Probable fibrosin-1 OS=Homo sapiens GN=FBRS PE=1 SV=3
FERMT2	1.51282	1.62552	1.53504	1.63809	1.55047	1.5924	1.63869	1.63317	1.72387	1.716	1.7512	1.64914	1.60991	1.58184	1.81525	1.67006	1.73608	1.64256	PREDICTED: fermitin family homolog 2 isoform X3 [Pelodiscus sinensis];PREDICTED: fermitin family homolog 2 isoform X1 [Geospiza fortis];PREDICTED: fermitin family homolog 2 isoform X1 [Pelodiscus sinensis];PREDICTED: fermitin family homolog 2 isoform X4 [Pelodiscus sinensis];PREDICTED: fermitin family homolog 2 isoform X2 [Pelodiscus sinensis]	GO:0005737;GO:0031674;GO:0005654;GO:0034446;GO:0008360;GO:0007160;GO:0016055;GO:0031941;GO:0072657;GO:0048041;GO:0033622;GO:0031234;GO:0005547;GO:0001725;GO:0007179;GO:0005829;GO:0005925;GO:0007229;GO:0034329;GO:0005938;GO:0005515;GO:0005634;GO:0031258;GO:0009986	cytoplasm;I band;nucleoplasm;substrate adhesion-dependent cell spreading;regulation of cell shape;cell-matrix adhesion;Wnt signaling pathway;filamentous actin;protein localization to membrane;focal adhesion assembly;integrin activation;extrinsic component of cytoplasmic side of plasma membrane;phosphatidylinositol-3,4,5-trisphosphate binding;stress fiber;transforming growth factor beta receptor s…	K17083	FERMT2,KIND2	http://www.genome.jp/dbget-bin/www_bget?ko:K17083	-	-	KOG4261(Z)(Talin)	gnl|BL_ORD_ID|386418;sp|Q96AC1|FERM2_HUMAN	sp|Q96AC1|FERM2_HUMAN Fermitin family homolog 2 OS=Homo sapiens GN=FERMT2 PE=1 SV=1;sp|Q96AC1|FERM2_HUMAN Fermitin family homolog 2 OS=Homo sapiens GN=FERMT2 PE=1 SV=1
FKBP8	1.93892	1.66801	1.75884	2.09902	2.19429	2.08842	2.21822	2.24112	2.21021	2.22549	2.25431	2.2463	2.27492	2.5197	2.41672	2.28126	2.2552	2.34177	PREDICTED: peptidyl-prolyl cis-trans isomerase FKBP8 [Pelodiscus sinensis]	-	-	K09574	FKBP8	http://www.genome.jp/dbget-bin/www_bget?ko:K09574	-	-	KOG0543(O)(FKBP-type peptidyl-prolyl cis-trans isomerase)	sp|Q14318|FKBP8_HUMAN;gnl|BL_ORD_ID|723	sp|Q14318|FKBP8_HUMAN Peptidyl-prolyl cis-trans isomerase FKBP8 OS=Homo sapiens GN=FKBP8 PE=1 SV=2;sp|Q14318|FKBP8_HUMAN Peptidyl-prolyl cis-trans isomerase FKBP8 OS=Homo sapiens GN=FKBP8 PE=1 SV=2
FNBP4	1.8485	1.84205	1.94335	2.30563	2.16545	2.24135	1.70723	1.67651	1.80875	1.66342	1.80387	1.72852	1.81405	1.73376	1.85932	1.84683	1.79428	1.93379	PREDICTED: formin-binding protein 4 isoform X1 [Pelodiscus sinensis];PREDICTED: formin-binding protein 4 isoform X3 [Pelodiscus sinensis];PREDICTED: formin-binding protein 4 isoform X2 [Pelodiscus sinensis]	GO:0005654	nucleoplasm	-	-	-	-	-	-	sp|Q8N3X1|FNBP4_HUMAN;gnl|BL_ORD_ID|55	sp|Q8N3X1|FNBP4_HUMAN Formin-binding protein 4 OS=Homo sapiens GN=FNBP4 PE=1 SV=3;sp|Q8N3X1|FNBP4_HUMAN Formin-binding protein 4 OS=Homo sapiens GN=FNBP4 PE=1 SV=3
FOXRED1	1.92195	1.46315	1.84757	1.4501	1.88264	1.62418	2.19187	2.01649	1.88997	2.11962	1.93339	1.85962	1.7195	2.41078	2.4131	1.69609	1.77452	1.96341	PREDICTED: FAD-dependent oxidoreductase domain-containing protein 1 isoform X1 [Pelodiscus sinensis]<>XP_006111306.1 PREDICTED: FAD-dependent oxidoreductase domain-containing protein 1 isoform X1 [Pelodiscus sinensis]	GO:0016020;GO:0005747;GO:0032981;GO:0005743;GO:0055114;GO:0016021;GO:0005739;GO:0016491;GO:0070469	membrane;mitochondrial respiratory chain complex I;mitochondrial respiratory chain complex I assembly;mitochondrial inner membrane;oxidation-reduction process;integral component of membrane;mitochondrion;oxidoreductase activity;respiratory chain	K18166	FOXRED1	http://www.genome.jp/dbget-bin/www_bget?ko:K18166	-	-	-	gnl|BL_ORD_ID|3475	sp|Q6DCP1|FXRD1_XENLA FAD-dependent oxidoreductase domain-containing protein 1 OS=Xenopus laevis GN=foxred1 PE=2 SV=1
FSTL1	1.87633	1.58001	1.64758	2.00294	2.10315	1.9286	2.23338	2.14376	1.97534	2.06692	2.14436	2.33556	1.27623	1.29226	1.12057	1.56372	1.48216	1.37291	PREDICTED: RNA-directed DNA polymerase from mobile element jockey-like [Nanorana parkeri];PREDICTED: follistatin-related protein 1 [Pelodiscus sinensis]	-	-	-	-	-	-	-	KOG3649(R)(FOG: Kazal-type serine protease inhibitor domain)	gnl|BL_ORD_ID|1462;sp|Q12841|FSTL1_HUMAN	sp|Q58D84|FSTL1_BOVIN Follistatin-related protein 1 OS=Bos taurus GN=FSTL1 PE=2 SV=1;sp|Q12841|FSTL1_HUMAN Follistatin-related protein 1 OS=Homo sapiens GN=FSTL1 PE=1 SV=1
GBAS	2.00385	2.07969	1.89293	1.82066	1.73094	1.90129	2.11558	2.10261	2.02576	2.07569	2.07588	2.01824	1.93757	2.02428	2.22984	1.91693	2.00307	2.00574	PREDICTED: protein NipSnap homolog 2 [Pelodiscus sinensis];PREDICTED: protein NipSnap homolog 2 [Chelonia mydas]<>EMP41079.1 Protein NipSnap like protein 2 [Chelonia mydas]	-	-	-	-	-	-	-	-	gnl|BL_ORD_ID|116447;sp|O75323|NIPS2_HUMAN	sp|O75323|NIPS2_HUMAN Protein NipSnap homolog 2 OS=Homo sapiens GN=GBAS PE=1 SV=1;sp|O75323|NIPS2_HUMAN Protein NipSnap homolog 2 OS=Homo sapiens GN=GBAS PE=1 SV=1
GHITM	1.96741	1.97552	1.90309	1.85769	1.83289	1.8109	2.11939	2.14616	1.95933	2.11354	1.95961	1.95453	1.85169	2.08045	2.01816	1.81218	1.86906	1.9348	PREDICTED: LOW QUALITY PROTEIN: growth hormone-inducible transmembrane protein [Pelodiscus sinensis]	GO:0016020;GO:0070062;GO:0005739;GO:0016021	membrane;extracellular exosome;mitochondrion;integral component of membrane	-	-	-	-	-	KOG1630(T)(Growth hormone-induced protein and related proteins)	sp|Q9H3K2|GHITM_HUMAN;gnl|BL_ORD_ID|10357	sp|Q9H3K2|GHITM_HUMAN Growth hormone-inducible transmembrane protein OS=Homo sapiens GN=GHITM PE=1 SV=2;sp|Q9H3K2|GHITM_HUMAN Growth hormone-inducible transmembrane protein OS=Homo sapiens GN=GHITM PE=1 SV=2
GJB1	2.31706	1.51428	2.30237	1.81974	2.44696	2.02111	2.5688	2.41992	2.72359	2.40805	2.66011	2.30322	2.49932	2.67664	2.93016	2.76378	2.4526	2.85889	PREDICTED: gap junction beta-1 protein isoform X1 [Pelodiscus sinensis]<>XP_006119250.1 PREDICTED: gap junction beta-1 protein isoform X2 [Pelodiscus sinensis]	GO:0005737;GO:0005886;GO:0030054;GO:0005922;GO:0016021;GO:0016020;GO:0007154;GO:0042803;GO:0005921	cytoplasm;plasma membrane;cell junction;connexin complex;integral component of membrane;membrane;cell communication;protein homodimerization activity;gap junction	K07620	GJB1,CX32	http://www.genome.jp/dbget-bin/www_bget?ko:K07620	-	-	-	gnl|BL_ORD_ID|338746	sp|Q6WGK6|CXB1_HORSE Gap junction beta-1 protein OS=Equus caballus GN=GJB1 PE=2 SV=1
GNL1	1.7767	1.77583	1.85836	2.06386	2.03834	1.98682	1.67468	1.78118	1.86386	1.75793	1.74515	1.77144	1.74889	1.76403	1.76953	1.79204	1.78732	1.84261	PREDICTED: guanine nucleotide-binding protein-like 1 [Pelodiscus sinensis]	GO:0003924;GO:0005525;GO:0042254;GO:0006974;GO:0005634	GTPase activity;GTP binding;ribosome biogenesis;cellular response to DNA damage stimulus;nucleus	-	-	-	-	-	KOG2423(R)(Nucleolar GTPase)	sp|P36915|GNL1_HUMAN;gnl|BL_ORD_ID|28956	sp|P36915|GNL1_HUMAN Guanine nucleotide-binding protein-like 1 OS=Homo sapiens GN=GNL1 PE=1 SV=2;sp|P36915|GNL1_HUMAN Guanine nucleotide-binding protein-like 1 OS=Homo sapiens GN=GNL1 PE=1 SV=2
GPR108	1.55715	1.37144	1.60217	1.86747	1.97132	1.89883	1.87274	1.77844	1.85278	1.80154	1.82543	1.87081	2.09047	2.11146	1.89741	2.12261	1.92267	2.00869	PREDICTED: protein GPR108 [Pelodiscus sinensis]	GO:0016021;GO:0016020	integral component of membrane;membrane	-	-	-	-	-	-	sp|Q9NPR9|GP108_HUMAN;gnl|BL_ORD_ID|18988	sp|Q9NPR9|GP108_HUMAN Protein GPR108 OS=Homo sapiens GN=GPR108 PE=2 SV=3;sp|Q9NPR9|GP108_HUMAN Protein GPR108 OS=Homo sapiens GN=GPR108 PE=2 SV=3
HCFC1R1	1.97114	1.83046	1.97891	2.42346	2.3166	2.32278	1.91561	1.94963	2.10075	1.86534	1.92236	2.00753	2.20809	2.18837	2.21864	2.08895	2.14264	2.25809	PREDICTED: host cell factor C1 regulator 1 [Pelodiscus sinensis]	-	-	-	-	-	-	-	-	-	-
HECTD3	1.88497	1.70449	1.80475	2.12267	2.1294	2.15703	1.9491	1.84148	1.92675	1.82289	1.84448	1.88258	1.86564	1.91025	1.94944	1.87361	1.88997	1.84423	PREDICTED: E3 ubiquitin-protein ligase HECTD3 [Pelodiscus sinensis]	-	-	K12233	HECTD3	http://www.genome.jp/dbget-bin/www_bget?ko:K12233	-	-	KOG0939(OK)(E3 ubiquitin-protein ligase/Putative upstream regulatory element binding protein);KOG0942(O)(E3 ubiquitin protein ligase)	gnl|BL_ORD_ID|33862;sp|Q3U487|HECD3_MOUSE	sp|Q3U487|HECD3_MOUSE E3 ubiquitin-protein ligase HECTD3 OS=Mus musculus GN=Hectd3 PE=1 SV=2;sp|Q3U487|HECD3_MOUSE E3 ubiquitin-protein ligase HECTD3 OS=Mus musculus GN=Hectd3 PE=1 SV=2
HGFAC	1.74202	1.98408	1.94973	1.71096	1.64434	1.61215	1.67099	1.71634	1.85715	1.74586	1.78168	1.55497	2.07711	1.9431	1.98829	1.88292	1.92829	2.09812	PREDICTED: hepatocyte growth factor activator [Pelodiscus sinensis]	GO:0008233;GO:0008236;GO:0005576;GO:0016787;GO:0006508;GO:0004252	peptidase activity;serine-type peptidase activity;extracellular region;hydrolase activity;proteolysis;serine-type endopeptidase activity	K09631	HGFAC	http://www.genome.jp/dbget-bin/www_bget?ko:K09631	-	-	KOG3627(E)(Trypsin)	gnl|BL_ORD_ID|397257;sp|Q9R098|HGFA_MOUSE	sp|Q9R098|HGFA_MOUSE Hepatocyte growth factor activator OS=Mus musculus GN=Hgfac PE=1 SV=1;sp|Q9R098|HGFA_MOUSE Hepatocyte growth factor activator OS=Mus musculus GN=Hgfac PE=1 SV=1
[truncated: 270 more rows]
